# Supplementary material for: PERT: A Method for Expression Deconvolution of Human Blood Samples from Varied Microenvironmental and Developmental Conditions
Source: PLoS Comput Biol. 2012 Dec 20;8(12):e1002838. doi: 10.1371/journal.pcbi.1002838 (PMC3527275; doi:10.1371/journal.pcbi.1002838)
Supplement: Table S12 — Gene expression profiles for deconvolving uncultured mono-nucleated and lineage-depleted cell samples. (XLS) [file pcbi.1002838.s015.xls]

## Sheet: ReferenceProfiles
	BASO_1	BASO_2	BASO_3	BASO_4	BASO_5	BASO_6	CMP_1	CMP_2	CMP_3	CMP_4	EOS_1	EOS_2	EOS_3	EOS_4	EOS_5	ERY1_1	ERY1_2	ERY1_3	ERY1_4	ERY1_5	ERY1_6	ERY1_7	ERY2_1	ERY2_2	ERY2_3	ERY2_4	ERY2_5	ERY2_6	ERY2_7	ERY3_1	ERY3_2	ERY3_3	ERY3_4	ERY3_5	ERY3_6	ERY4_1	ERY4_2	ERY4_3	ERY4_4	ERY4_5	ERY4_6	ERY4_7	ERY5_1	ERY5_2	ERY5_3	ERY5_4	ERY5_5	ERY5_6	GMP_1
1007_s_at	39.3892	40.4129	27.4682	51.1814	45.7682	50.445	29.2117	27.5208	19.6191	29.7715	31.3571	35.7357	37.8121	34.4182	39.9625	28.0566	28.1212	35.9577	40.6436	29.6594	35.035	30.7387	41.0496	32.8526	26.4951	29.0409	35.3366	36.869	38.4404	49.6158	38.9075	38.5	34.7	40.3563	36.2764	32.2305	36.7939	22.0827	41.5832	28.0137	29.5904	32.5241	48.6536	33.2957	46.1546	35.3142	46.4152	38.0203	41.5175
1053_at	54.2831	46.3323	42.9777	45.0568	44.0846	45.9587	44.1354	111.761	58.7214	28.1163	30.758	39.8078	51.0433	33.8731	47.2196	74.792	36.6924	55.0545	57.071	75.7929	59.171	53.9626	44.1182	91.1026	56.1884	75.3718	51.3388	64.2613	46.699	44.0576	43.518	62.1868	45.4222	35.7777	33.8363	43.4722	46.714	32.2272	46.8638	59.4468	30.8669	95.061	31.3355	49.7061	32.8406	29.8009	54.0971	26.6426	45.2915
117_at	43.1522	47.6712	42.0597	32.3082	40.3543	36.365	30.0052	32.4484	42.9368	22.8614	32.2094	30.0316	26.856	25.9371	36.255	31.5813	31.0934	32.4632	33.2056	32.1586	29.7697	28.683	30.7253	33.4664	29.361	36.3873	36.8807	32.4929	30.1809	31.2484	26.9327	33.1326	32.8681	29.7744	32.2821	29.5549	27.5644	33.24	25.2904	31.2815	33.6164	31.0665	29.494	31.8149	32.0428	27.7724	31.631	32.3634	43.7433
121_at	37.0458	33.2501	30.1509	36.6908	38.0668	35.953	35.2935	30.1462	18.8725	26.2933	28.267	32.0901	33.5357	33.5675	33.3258	30.1906	29.7154	38.5599	34.1322	32.096	34.2103	39.5857	31.9144	36.1974	27.0599	36.3586	37.4793	31.1356	33.4792	37.7035	38.3946	37.2224	35.7063	35.2023	35.4077	31.405	36.7841	31.6595	28.2701	34.5247	26.9414	32.3944	37.8176	38.1743	38.0339	32.2546	40.8697	34.7535	34.3049
1255_g_at	23.4945	24.1856	25.2531	26.7704	25.9228	22.9578	23.3314	23.7149	30.7276	23.387	23.8537	22.3977	22.9484	20.5286	22.3948	22.8516	26.0899	27.9116	21.6808	22.5776	23.7713	25.6905	21.0121	22.8147	21.3228	22.412	25.3531	24.6761	22.9305	22.7933	23.7932	23.0043	25.423	24.2253	23.1933	23.987	23.0434	23.2724	22.3297	22.771	23.8037	23.9365	22.4671	23.9354	22.9326	22.8159	20.9653	24.4003	25.6624
1294_at	36.8477	28.1638	46.4348	36.1141	36.5474	57.9896	37.7268	50.291	63.3364	33.572	25.0206	29.9063	40.9032	21.8415	35.7859	38.3136	28.2976	49.2737	35.9343	51.2815	47.9807	40.5613	28.1371	46.9083	45.8051	64.3797	55.7541	39.4564	40.0522	26.9555	34.1843	28.2314	23.0456	28.8288	27.9228	30.0513	33.6282	29.3711	29.6331	44.4545	27.9743	26.5491	34.8904	30.5258	31.7948	25.7297	28.3847	55.7108	48.8223
1316_at	65.4598	55.3237	54.6437	48.1583	47.9799	53.3967	52.0945	50.2146	61.9809	43.5601	56.4757	46.4704	54.3485	41.7604	36.3824	54.3115	68.1093	51.3902	41.7961	46.8407	49.401	50.6562	53.4269	47.2583	60.6888	45.4709	51.1895	51.9826	50.8483	50.7582	60.6111	45.6609	53.9273	48.2363	45.4885	43.9622	40.5569	61.4762	58.784	55.0204	59.8326	53.7848	44.4555	58.2772	45.7315	53.4176	49.9041	45.7867	43.4074
1320_at	27.4768	28.5224	29.2514	31.9785	28.627	28.5882	34.354	35.5435	51.2356	30.5299	32.8348	28.7089	27.7326	26.1964	28.4773	31.3761	31.1974	29.7555	32.4422	30.3352	25.8941	35.5204	30.3393	30.7595	29.8547	31.0797	31.8339	27.0615	28.3807	26.7243	23.8676	25.9662	28.7178	24.4156	27.1583	26.5478	26.3237	36.8873	26.2255	36.0533	31.4079	26.2631	26.0424	28.5523	29.883	29.0873	28.7728	36.0426	32.3023
1405_i_at	306.704	305.87	658.077	425.919	465.693	249.933	493.502	683.24	596.071	1403.4	3327.67	692.41	458.543	526.735	285.984	917.409	3455.64	249.541	183.112	2116.42	600.404	919.312	836.029	972.592	3648.52	2664.04	473.984	217.188	378.823	183.361	367.581	174.034	729.391	161.405	151.287	400.084	284.464	4217.73	306.586	2586.24	1937.38	222.736	281.177	843.798	566.12	1114.79	391.678	212.583	181.051
1431_at	39.0285	41.1873	47.4204	34.861	34.8962	42.1057	32.4459	42.6182	35.3573	52.1543	29.5007	30.7858	26.6935	34.3087	33.2472	33.1439	50.0144	28.1229	29.5336	31.1117	31.52	36.3292	37.5259	34.56	31.6227	31.7073	25.3166	28.0018	32.2485	28.802	30.8548	27.8472	29.0998	29.6869	27.2766	34.3557	29.9142	29.2917	33.7469	48.9026	27.324	29.5788	26.9774	31.4132	24.8943	29.812	27.3353	29.329	33.3605
1438_at	31.3515	40.6734	47.4187	43.0497	37.3619	36.8651	40.7408	49.8404	74.9114	27.5103	41.1592	38.0088	38.1619	37.7637	35.1857	41.4275	44.7167	40.1436	32.643	38.4119	47.7242	52.4247	46.047	45.4498	40.0558	43.5059	38.3673	38.2599	41.9187	37.2996	41.1041	34.0426	45.5325	39.5318	32.9262	41.0932	40.4561	40.0216	31.8894	45.5815	42.236	34.5701	37.6506	38.8477	37.0357	42.4269	35.7041	34.0901	41.7949
1487_at	34.6277	35.8236	33.0736	33.701	33.2205	37.7108	21.6226	23.3639	17.0324	16.4618	14.1022	25.3833	50.6695	18.2804	31.7814	33.3956	13.8457	24.0048	24.4887	26.3855	27.066	22.6474	18.3561	32.9631	37.8067	31.5464	36.0515	32.923	19.246	18.7335	19.4417	33.287	19.1947	20.8113	22.57	13.8042	19.6348	17.9393	18.7045	22.7433	20.365	35.5993	23.8822	20.8327	18.4867	17.5244	16.1827	27.7433	39.2325
1494_f_at	27.8757	29.1069	26.6761	25.5242	26.1609	28.4231	31.2887	33.1018	52.9714	32.8874	32.7353	31.8043	33.4598	33.3421	28.0162	32.0979	37.1343	33.6942	33.5583	33.9432	36.7102	34.09	33.9026	32.1837	37.4777	33.5556	31.3312	29.0364	29.4241	31.0611	30.4095	31.2636	31.367	29.3826	30.8315	33.0106	28.8832	32.769	28.889	48.5032	35.0586	30.7679	26.4766	33.9987	30.31	36.4765	27.6469	31.4384	30.4324
1598_g_at	30.4861	29.0698	24.1749	27.4614	29.9287	28.3292	21.5198	18.5671	10.6011	15.2661	15.1261	24.0809	31.1557	22.2159	32.1191	18.8069	14.6687	21.1466	20.04	18.9506	18.2448	18.5097	18.2911	21.0306	13.6571	21.4854	23.8563	20.3268	19.9735	22.8975	23.0026	23.9882	18.2956	25.3548	20.6485	18.0622	21.7749	16.5091	19.3002	19.4929	16.6908	20.5291	23.5225	16.5929	25.0939	17.3923	19.7384	20.549	21.0655
160020_at	30.6458	32.6816	29.4682	32.3946	35.0862	30.0452	30.1088	23.212	16.8018	24.0754	23.8829	28.9643	30.0747	27.5181	35.608	27.3317	22.183	34.6203	28.7443	27.1463	25.6713	26.5139	28.0266	32.9945	20.4771	26.3152	40.8515	28.6219	32.7114	39.2579	29.3356	27.1867	25.9958	37.5344	32.8224	27.2461	32.4758	22.7632	31.7935	22.6537	21.162	27.3266	35.2819	29.4532	34.4511	24.5404	33.6001	34.1295	30.0937
1729_at	30.9707	29.299	23.6884	28.7001	29.2709	32.115	27.0084	34.8701	11.0505	20.392	20.4838	26.6304	30.2824	25.3827	31.9426	25.2358	19.5096	27.7881	24.4008	20.4312	24.0282	26.857	22.6602	28.6857	26.1336	29.534	28.3201	30.7014	30.7043	24.3575	22.6534	26.7794	20.1548	25.4803	23.4681	22.5704	24.69	16.4419	25.3455	17.7142	18.2194	37.8518	29.8442	24.4966	24.7285	22.5929	29.0773	29.9987	28.2453
177_at	34.8486	30.621	52.9791	29.1745	25.4223	25.5273	51.9409	36.3097	73.4319	22.7081	32.6079	26.4179	27.0114	22.2119	24.8963	46.0825	43.0221	33.0055	32.9002	33.7342	52.1843	38.7415	36.9819	52.647	44.3601	42.8893	48.1247	74.9697	35.6068	34.96	30.8214	27.3177	28.2059	25.2576	26.0183	33.0569	28.3832	47.9064	32.1658	66.8388	23.866	42.7163	28.5101	32.8745	27.1655	27.2448	23.662	26.5985	29.8641
1773_at	29.3797	23.1608	26.2012	28.2721	26.0016	26.2758	27.3757	25.9545	25.746	21.8201	23.1887	24.3473	25.4058	23.5956	25.2793	23.3498	24.7096	25.5024	24.4022	25.8817	23.9338	27.4496	30.84	30.082	22.1319	26.6203	31.3689	30.3462	25.4323	26.2128	24.4765	27.6859	24.4583	24.7986	24.3758	23.1468	25.4449	20.9637	24.5601	22.1291	29.2038	25.5628	29.1297	23.9875	31.0487	24.5696	25.7904	25.9442	22.3026
179_at	21.8755	20.8641	22.5094	20.5648	20.4755	21.7541	20.9184	19.8122	28.2489	22.3711	18.6322	19.2605	22.3314	17.4007	19.0072	20.8018	19.8543	26.2168	20.9572	17.4234	24.4757	19.6828	17.7603	22.0658	18.0736	21.1181	23.8736	25.1013	22.259	23.4988	21.6718	24.5437	20.5126	24.7389	28.4416	21.9392	20.6994	19.7218	25.2173	19.7817	22.2248	22.2462	23.2627	19.7333	23.2932	18.4697	23.6786	26.6407	24.8255
1861_at	23.1035	25.1782	29.3984	21.7988	22.5167	22.7802	28.6971	19.638	29.7158	20.4406	21.4342	23.2234	25.2006	20.8062	25.8818	21.9139	20.481	23.2057	22.2124	20.9868	22.5067	22.7851	23.4474	25.6864	21.2218	23.5237	24.5574	24.8596	20.6075	23.1077	20.5833	25.5193	18.4832	23.0766	22.8595	22.2225	22.2424	17.131	20.5424	21.5765	24.2717	23.6982	19.4292	20.6673	21.3547	19.7686	20.92	22.5137	26.5293
200000_s_at	58.443	56.2578	56.8353	55.6642	51.7988	44.572	61.5335	77.6043	72.6511	57.4979	45.4649	53.3545	72.3394	51.0278	48.2863	158.093	60.2648	81.5288	55.5818	95.0766	132.59	183.493	65.1393	68.6364	163.39	181.521	116.684	115.588	56.4993	81.7851	55.3018	50.2859	54.4213	42.6634	55.7343	64.7227	51.6569	73.903	38.579	82.535	65.6356	219.717	46.4618	84.9049	50.6678	66.2744	29.9394	40.1878	55.2075
200001_at	116.45	90.3939	70.0976	77.7865	78.0094	245.726	118.901	83.7199	51.8453	22.7442	40.3457	117.679	188.25	111.076	227.325	235.328	54.0543	216.452	90.3199	164.234	433.879	421.158	101.326	244.737	390.054	451.642	332.695	365.447	249.481	522.903	332.845	307.085	153.792	414.573	99.3169	146.318	358.69	80.3997	173.082	144.175	24.2401	343.734	79.9302	155.947	163.2	65.755	97.0751	128.49	327.039
200002_at	1061.63	711.143	644.176	464.866	479.031	1132.71	2333.14	2063.89	1769.64	1451.81	664.678	644.286	755.666	553.563	619.735	2444.59	1526.58	1581.24	1137.66	887.288	1176.88	1318.1	2028.31	1391.26	2492.83	1771.74	638.926	734.182	827.925	358.467	44.0706	913.07	53.1436	92.6241	292.226	70.6977	101.352	15.4896	116.273	306.082	149.464	768.134	819.487	31.3772	245.112	547.792	311.81	308.145	1032.31
200003_s_at	3625.22	2550.65	3414.9	2177.88	1918.52	2671.18	6105.77	3924.19	3448	3890.67	1590.59	1737.43	2421.77	1289.27	1834.84	4527.37	3459.7	3089.29	2501.22	2641.68	3131.5	3458.27	908.563	2508.91	4979.91	3616.07	1839.52	2361.38	2046.1	614.126	497.458	670.318	550.557	429.229	660.39	1213.9	378.549	522.839	469.955	2108.65	646.54	1226.39	1662.41	536.002	594.547	1429.36	695.976	1019.34	4520.01
200004_at	2384.42	1348.02	2917.58	1514.26	1794.07	1954.78	2434.19	2308.36	2854.79	1895.78	1290.58	1509.41	2479.78	875.833	1851.85	2914.29	2278.89	2027.79	1661.88	2447.5	2345.23	3023.86	1222.89	3179.88	3559.21	2541.35	3114.08	2967.44	2930	1692.27	1107.58	1573.72	1566.54	1506.25	1436.17	2166.52	1285.17	2968.84	1676.79	3022.13	1587.06	1332.63	2252.79	2074.27	1978.51	2650.24	1379.99	1267.83	2336.49
200005_at	233.029	277.163	234.342	270.386	250.326	392.832	488.69	346.523	426.339	270.763	197.313	252.664	377.127	143.933	380.515	589.547	249.766	618.318	463.274	520.451	465.115	448.172	63.7729	413.514	410.636	695.256	417.394	318.552	429.171	169.869	60.5054	303.896	38.9171	80.9079	99.1571	86.4693	166.022	46.3537	81.8649	159.84	53.8075	352.961	84.4776	90.5303	64.2281	23.104	121.492	108.552	279.667
200006_at	780.684	696.733	750.673	533.953	926.172	704.449	815.75	859.329	1082.35	372.605	543.769	785.4	970.994	693.392	1039.33	1246.32	828.758	1470.83	631.46	1290.79	927.188	1037.02	181.335	1046.97	1494.07	1230.71	1233.82	1061.27	986.737	485.644	85.3638	1003.11	166.268	266.512	195.422	195.117	155.54	237.379	290.787	717.062	168.948	512.42	137.5	481.175	323.79	100.768	320.381	275.943	656.173
200007_at	1233.49	818.1	1117.91	747.708	1000.85	1102.1	2669.88	2259.27	2245.49	1593.71	849.209	948.886	1441.02	645.225	1026.74	2774.34	1937.59	1408.99	1323.18	2423.11	1891.83	2516.78	1064.84	1813.81	3088.91	2216.19	1991.01	1933.43	2233.04	1702.93	880.532	1281.41	1295.89	1194.08	794.955	2331.11	742.046	2309.74	1142.87	2785.19	1123.55	1379.61	1319	1295.62	993.828	2106.47	619.085	735.611	1219.8
200008_s_at	282.63	432.047	300.001	344.178	225.215	626.239	291.399	107.905	169.804	29.4309	283.342	319.51	573.992	191.034	335.434	431.897	191.498	759.986	251.739	228.215	199.011	322.695	103.73	743.54	447.885	605.999	526.003	453.555	457.252	79.7737	46.6913	216.217	38.1516	34.67	145.166	51.72	44.7685	32.4837	43.7683	73.9271	50.5731	191.065	41.0424	42.9824	52.8337	37.9134	79.798	153.428	271.924
200009_at	5329.81	4645.98	5410.23	3778.58	4256.56	3114.28	6619.57	5897.95	5648.41	3512.86	2747.02	3651.96	5604.33	2719.78	4248	6173.24	6244.56	4576.38	4646.14	3450.52	4740.69	4104.38	3082	5129.73	6040.37	5551.52	3766.93	4455.64	2824.41	1448.36	706.608	1209.2	867.728	829.828	1366.24	2251.14	805.447	1183.74	1137.73	3924.91	1953.14	1770.33	2941.68	682.814	1115.91	2734.13	1865.81	1906.95	5818.69
200010_at	1950.1	1747.51	2320.75	1546.45	1486.05	1916.23	4214.07	3208.1	2978.27	3318.25	1471.04	1613.5	2404.74	1023.09	1872.73	4118.89	4015.64	2910.95	2252.76	2833.1	3120.21	2992.99	479.744	2308.11	4282.22	3203.94	1910.59	2268.79	2303.57	657.923	473.443	747.501	677.512	389.731	496.762	847.715	306.291	663.494	488.168	2209.94	518.535	1197.29	1391.36	553.014	555.298	575.731	704.375	718.015	2029.86
200011_s_at	301.125	357.026	154.014	394.241	585.88	612.585	466.63	321.045	405.015	31.3661	222.322	433.322	802.51	260.967	757.222	925.202	477.665	884.99	523.277	599.313	529.638	626.132	695.353	1414	1157.31	797.351	691.078	729.115	832.834	52.1555	30.511	43.8487	25.2129	16.9392	20.6083	44.3886	54.6385	7.26911	64.7979	196.936	59.4066	59.1528	40.995	44.3172	163.841	28.2029	162.409	142.045	631.261
200012_x_at	3747.89	3536.16	5033.29	2974.87	3591.14	2949.31	5654.66	4122.87	3720.34	4507.78	1799.96	2549.23	4073.11	1746.65	3297.92	5152.81	4906.27	3534.92	3305.92	4499.73	5008.81	4764.98	1199.17	3503.21	5094.56	4219.51	3956.22	4596.31	3922.74	3673.05	3259.48	3373.49	3849.4	3574.34	2342.41	4523.33	3121.39	4966.11	3505.73	5497.3	2796.78	3778.29	5292.28	3690.34	3426.51	4616.65	2095.16	3164.74	3468.73
200013_at	4993.84	4713.9	5172.52	3902.84	4022.2	3295.29	6775.99	5264.18	4150.23	4774.4	2260.88	3055.69	4551.81	2364.83	3582.44	5288.31	5332.88	4191.62	4524.57	4190.22	4409.31	3889.7	2324.55	4360.62	4906.35	4320.91	3777.03	4124.2	3371.9	2169.99	1404.04	2182.86	2041.6	2043.62	2096.77	3143.31	1619.95	3382.55	2262.63	4617.21	2518.92	2780.13	3478.06	2423.9	2571.6	3596.13	2490.73	3014.87	4786.66
200014_s_at	1655.91	765.735	1001.67	703.683	1107.13	1168.87	1826.26	1446.23	2187.96	1158.26	572.113	777.203	1181.62	510.392	1057.49	2081.99	1553.48	1617.54	1020.76	1435.94	1169.08	1450.57	413.99	1835	2139.3	1322.92	1770.46	1760.68	2324.06	748.601	367.52	818.09	779.302	748.422	704.953	1008.26	609.009	1097.77	892.461	1707.73	600.685	702.181	1037.63	833.777	886.175	494.028	897.09	511.16	1681.69
200015_s_at	1609.51	1349.78	1456.27	1217.39	1758.72	1279.09	2637.3	3228.43	3247.83	1304.8	1297.28	1622.95	2019.66	1300.18	2036.59	2781.25	2340.58	1684.27	2145.81	2379.06	2610.2	2746.11	1348.32	2563.61	3017.29	2432.67	2482.38	2383.12	2766.31	1303.77	1224.28	1021.96	1032.43	871.644	874.092	1874.42	1376.2	1442.28	1488.67	2366.08	1162.38	1031.84	1424.93	1051.71	1082.82	1426.55	1121.82	992.406	1828.93
200016_x_at	5935.19	4899.38	5226.17	4080.82	4722.84	3805.5	8266.47	5998.63	5919.92	4933.72	2461.8	3431.45	5589.23	2290.64	4398.96	7346.43	7469.49	6103.25	4982.79	4771.59	6544.85	5523.95	2202.67	6550.53	6987.91	5746.2	4802.61	5661.94	3638.46	1976.14	1308.47	2042.17	2216.95	1539.9	2217.84	2492.41	1713.6	2749.94	2091.99	5635.89	2836.87	3241.77	2982.79	1802.19	2222.45	2703.26	2978.43	2720.16	5860.4
200017_at	5108.15	4025.07	5107.31	3755.7	3826.21	3330.08	7259.42	5697.63	4519.7	5787.11	2497.83	3099.44	4770.48	2335.48	3316.12	6206.28	5996.16	4592.24	4729.76	4153.96	4506.98	4319.79	2261.8	4518.76	6540.77	4760.87	3427.04	4713.62	2836.7	1485.35	722.78	1633.12	1555.06	835.124	1481.56	1863.22	715.174	2436.91	1261.88	4815.26	2234.45	2245.06	3660.47	1184.58	1379.07	3084.45	1625.28	2695.52	4877.21
200018_at	4605.85	3836.94	4826.87	3016.34	3519.73	3170.22	5700.16	4950.19	4768.11	4566.81	2083.57	2850.18	4540.62	1900.94	3669.43	7529.72	7849.64	5050.5	4792.25	4119	5584.74	4610.88	1649.37	5232.24	7183.93	5438.41	3856.83	4678.26	3024.22	1297.03	505.779	1287.8	1526.26	792.699	1165.99	1905.64	568.179	1683.83	1586.52	4403.89	1732.97	2297.46	4177.2	815.734	1666.96	2863.58	1560.55	2237.49	4151.62
200019_s_at	1643.95	1556.62	1835.94	1063.13	894.26	2208.86	2741.04	2022.48	2362.82	2082.1	1267.97	1284.86	1381.68	1309.6	1187.86	2369.04	2069.58	1967.36	1159.36	1413.83	2105.07	2278.48	789.607	1678.79	2918.96	1972.39	1549.43	1737.14	2437.43	748.734	629.964	837.068	785.351	726.566	841.252	1253.92	537.938	675.152	704.458	1060.19	347.725	1183	1168.3	434.948	763.94	661.248	931.226	667.833	1903.4
200020_at	2388.33	1895.21	1987.4	1313.33	1897.87	1330.43	3144.15	2978.97	3916.07	1895.36	1622.92	1778.97	2442.89	1378.68	1832.34	3732.15	3487.29	2637.77	2670.16	1863.71	2317.94	2046.62	1554.28	2904.04	3632.72	2916.24	2090.63	2367.64	2256.13	755.68	119.874	1097.01	280.876	271.718	725.132	914.986	256.669	234.631	405.4	1727.35	788.927	935.089	1164.81	381.25	521.364	576.038	890.143	560.829	2575.77
200021_at	2813.26	2156.59	3513.37	2045.12	2552.07	2193.67	3936.19	3546.71	3719.53	2688.83	2085.24	2194.02	2777.85	1661.63	2407.49	4629.9	4427.22	3003.57	2173.08	2297.03	2205.3	2702.98	4641.31	4634.18	6109.54	3313.79	2446.4	2558.86	2085.12	468.957	1183.3	718.84	515.088	186.408	683.754	625.245	149.878	134.192	1389.68	2017.94	886.631	1024.35	2102.46	122.266	476.351	1573.24	1109.93	512.013	3185.27
200022_at	1391.87	1685.06	1721.17	982.739	953.061	1779.52	3059.96	2561.63	2781.4	2731.9	1237.81	1133.66	1386.24	892.206	1078.89	2802.16	2479.08	2135.29	2243.94	2049.89	1764.17	1802.51	1543.26	2014.37	3264.63	2284.49	1353.01	1455.34	1743.05	509.262	108.606	689.047	347.57	209.608	381.611	498.14	277.526	169.98	292.696	1196.19	393.292	777.382	1743.05	211.822	360.759	1873.99	598.889	729.343	2269.88
200023_s_at	817.333	876.468	953.284	603.564	660.859	946.173	1564.52	1349.09	1695.22	1164.42	717.782	739.984	1087.86	433.082	886.654	1681.41	1170.35	1942.07	1371.78	1044.67	777.937	969.199	201.049	1585.39	1635.44	1641.56	720.441	662.969	778.583	100.165	84.4027	507.802	50.0833	51.8007	225.199	78.6293	41.3326	21.738	84.1662	343.202	139.717	506.311	648.11	24.0198	121.53	107.173	127.909	236.392	1132.34
200024_at	957.74	1088.97	1043.13	798.25	727.614	1309.28	1757.18	2122.59	1959.49	1612.26	1143.99	810.325	934.701	596.69	675.759	2485.04	1436.35	1512.28	1262.5	1752.07	1603.59	1666.82	1154.67	1084.01	2114.99	1690.87	858.508	935.433	1035.48	303.631	109.706	500.37	174.662	46.1467	208.235	122.024	91.4094	142.124	124.948	604.174	179.889	1052.64	526.077	155.163	113.173	586.625	211.102	419.992	777.344
200025_s_at	5434.79	4185.33	4950.53	3681.52	3651.29	3312.15	6751.3	5752.97	4616.66	4996	2342.2	3110.46	4887.08	2244.58	3643.28	6787.07	6284.96	5007.66	4364.47	3464.65	4520.85	3992.18	2879.78	4941.11	6627.72	5151.47	3273.81	4115.53	2508.88	1059.01	599.453	1257.41	1083.12	611.964	1333.53	1552.34	443.744	946.661	999.893	3822.56	1632.32	1977.95	2862.08	615.073	1052.26	2185.49	1643.01	2224.2	4933.87
200026_at	3713.18	3765.55	4904.66	3597.38	3508.17	3137.4	6920.78	4940.59	5201.94	5139.79	2226.06	2936.07	4289.89	2085.92	3730.65	6891.79	7212.73	4924.44	4109.23	3714.45	4820.02	4631.84	1357.43	4918.34	6532.19	4920.18	3568.54	4247.92	3307.89	1062.52	685.593	1272.71	1256.41	699.054	1366.74	1923.11	510.392	1387.01	1248.26	3777.95	1149.94	2111.72	2808.79	777.245	1280.72	1334.37	2466.98	1574.3	4614.94
200027_at	409.781	520.863	241.631	379.354	425.341	517.493	670.21	870.889	1030.03	321.837	275.303	449.188	707.286	296.856	704.308	977.203	671.188	835.624	670.265	793.14	698.065	877.553	96.4814	991.187	1056.38	809.957	1035.97	1104.35	1489.82	1308.34	973.803	1215.07	1095.06	1140.15	787.909	1456.2	983.386	2154.12	1042.81	1486.68	949.778	737.921	789.95	1405.68	1031.45	664.087	861.997	572.355	660.269
200028_s_at	4019.66	3603.35	4200.82	2718.74	3024.09	2689.7	5436.97	4622.32	5181.16	2113.99	2558.14	3005.35	4311.45	2358.76	3135.81	7752.25	6234.64	4666.44	3448.33	2764.76	3989.39	3758.22	3848.77	5221.5	8302.13	4646.87	2920.04	3552.43	2268.09	783.216	100.99	1128.02	293.815	152.754	695.315	311.332	144.58	91.9492	358.624	2377.59	766.655	1180.73	1826.26	73.2219	480.409	135.952	1086.45	743.874	4505.93
200029_at	4345.22	3721.06	4859.54	2414.19	2274.41	3631.84	7730.08	5727.78	4937.51	4934.67	2319.77	2663.72	4078.47	1921.55	2769.26	7886.72	7146.16	4974.88	3434.86	3939.36	5202.2	5304.63	3297.25	4256.51	8498.37	6184.36	3254.4	4221.1	2811.04	701.489	339.172	755.285	969.842	482.856	990.864	865.161	282.868	474.101	546.4	3351.66	889.018	1932.73	3379.9	388.484	486.491	370.468	1277.08	1158.21	4081.52
200030_s_at	1097.37	1202.16	1032.16	718.081	798.894	1418.53	2225.3	1695.02	2710.26	1645.19	994.124	1161.39	1627.47	824.87	1363.26	3278.84	2749.6	2858.11	1687.06	1083.38	1000.64	1195.17	182.852	3221.48	2743.31	1691.94	1346.81	1321.06	1569.25	795.993	45.8754	649.793	104.929	111.392	577.279	171.04	155.99	86.6628	298.442	752.189	490.444	439.681	109.713	169.98	248.191	213.083	643.012	428.49	2133.27
200031_s_at	7512.79	6651.97	7476.68	5528.23	6418.39	4697.04	8836.72	6787.34	5192.98	5884.88	2852.17	4253.67	6682.01	3208.14	5354.53	6592.84	6019.98	5198.55	5273.53	5370.58	6296.82	5647.74	2500.59	5422	5922.32	5805.59	4837.87	5825.59	4188.27	3980.14	2637.73	4007.56	3717.1	3944.22	3405.72	4917.3	3449.19	5079.71	3864.01	5906.69	3999.82	4596.73	5716.74	4023.5	4079.49	5642.42	3492.78	5052.75	6266.85
200032_s_at	5723.44	4898.55	5884.57	4307.1	4912.91	3560.44	6477.81	6120.08	4870.52	5200.67	2201.74	3277.21	5602.69	2258.97	4139.48	8058.95	7933.01	5713.61	4690.09	3969.75	5651.74	4373.2	1937	6146.25	7161.79	5602.3	4225.47	4911.69	2954.11	1921.95	1068.03	2287.35	2131.43	1658.58	2191.83	2175.5	1094.9	1946.94	1613.13	4785.56	2078.37	2637.8	3883.61	674.855	2163.42	2692.4	2761.11	2890.22	5412.37
200033_at	2464.69	2869.67	3782.95	2628.07	2617.91	2827.7	4229.04	2971.88	3546.73	3687.63	2711.97	2683.82	3697.51	2249.93	2299.57	3757.08	3402.36	3413.6	2500.32	1625.66	1894.23	1708.75	972.385	3108.68	4187.59	2605.72	1705.72	1979.19	1406.34	791.337	73.8699	638.748	173.232	164.346	682.782	279.14	151.333	161.654	264.161	1134.72	588.701	628.86	1259.34	76.2984	340.516	495.883	913.859	692.345	2430.4
200034_s_at	2490.24	2365.1	3327.73	1850.96	1916.94	2282.81	4225.58	3454.16	3493.33	2281.81	1700.27	1848	2749.92	1247.36	1999.76	4831.11	5047.93	2946.2	2365.33	3174.42	3951.9	3695.75	1130.5	2703.36	5184.79	3563.21	2524.43	2907.74	2319.66	1043.39	778.359	1144.49	1031.95	768.727	792.933	1090.5	524.594	1892.3	910.677	2959.21	981.963	1518.88	910.422	1197.7	806.607	1861.43	856.069	917.608	2464.77
200035_at	74.824	88.6951	68.6287	79.5261	88.935	100.589	49.233	31.7852	25.2018	21.2779	22.8916	53.7953	75.89	45.6453	105.614	34.954	15.8754	54.0387	35.9233	59.3396	68.5262	63.7102	23.908	90.2557	41.9926	72.0237	79.8185	96.1201	111.932	92.1843	53.592	142.122	44.4173	93.6105	70.5668	66.4858	92.2542	35.3921	55.2996	23.4802	28.4874	93.844	111.346	72.5293	116.291	32.9025	41.5687	36.7931	174.569
200036_s_at	2978.96	2645.43	3438.95	1728.64	1531.28	2639.71	5797.95	4127.16	4593.89	4023.02	1963.22	1841.21	2473.91	1466.93	1613.06	6576.24	6847.84	5394.98	2957.35	1876.63	2974.08	2861.54	2257.22	4891.13	7085.8	4085.08	2131.01	2575.74	1784.47	456.129	92.0488	724.521	260.945	99.5395	435.44	97.1649	96.6046	166.583	127.206	1290.54	452.998	947.826	254.712	62.1475	300.068	256.698	848.638	588.776	4129.94
200037_s_at	563.69	814.315	340.218	909.627	619.423	708.56	1471.82	1372.03	1926.41	570.396	473.054	630.019	927.246	456.472	786.856	1586.94	1680.8	1422.96	1578.29	1268.24	1234.6	1453.13	405.636	1586.09	1794.87	1112.39	1565.48	1719.01	2021.85	667.96	324.775	769.266	386.007	309.673	720.449	809.017	584.932	704.944	526.353	1319.71	614.158	650.974	877.779	528.395	583.683	485.491	605.14	592.873	1183.68
200038_s_at	3165.58	2820.97	4537.41	2452.26	2310.01	3325.45	7255.75	5503.83	4178.27	4140.25	2331.69	2526.38	3863.96	1679.29	2692.57	8652.73	9322.65	4871.18	2771.68	3989.64	4508.34	4294.38	1447.79	4241.13	9083.25	5740.21	2963.13	3417.15	2116.81	585.828	645.16	855.323	711.685	303.804	655.762	264.376	256.783	545.444	457.551	3204.82	753.114	1670.76	756.492	510.321	447.309	732.751	1039.99	678.064	2248.27
200039_s_at	104.814	142.482	96.8654	75.9925	89.8086	146.105	232.849	177.923	174.202	49.3933	77.4636	147.802	255.618	87.9058	274.163	386.236	97.2361	300.766	160.53	263.569	404.72	320.615	183.999	340.285	320.068	480.7	360.682	438.301	246.444	108.141	88.9361	202.856	67.393	66.5264	95.4799	102.019	118.656	67.7916	108.163	138.813	62.7452	421.299	123.39	83.9949	70.0736	103.413	72.3498	102.24	274.443
200040_at	912.199	964.607	1062.36	561.415	747.617	972.117	1833.69	1609.92	2699.04	930.475	686.031	847.626	1375.42	491.475	1113.11	3297.91	3207.49	2961.94	1210	1241.3	1204.04	1507.66	913.857	2674.87	3191.21	1733.8	1306.42	1401.56	1414.25	470.667	38.724	624.858	65.6108	94.7418	332.605	112.791	28.7731	32.0463	301.661	599.178	170.646	485.879	138.429	51.1944	260.066	60.4825	354.025	268.482	1370.67
200041_s_at	1915	1735.64	1781.1	1086.23	1448.67	1187.79	3884.72	2522.06	4193.91	953.403	1358.97	1524.83	2535.22	1092.14	1436.74	5500.79	4382.68	4838.3	2991.34	2164.62	2252.16	2269.26	3268.85	4520.52	5696.66	3587.71	1975.2	2383.18	1535.45	1130.24	73.1675	1500.46	120.688	158.894	540.285	383.414	303.661	198.906	422.033	1707.48	598.534	568.44	51.4622	26.7692	314.683	742.426	665.646	577.877	2544.02
200042_at	105.211	148.91	91.1946	86.5838	114.779	188.259	103.396	93.3647	54.1358	79.6985	36.1652	90.5683	196.247	67.2887	140.887	308.738	73.9719	306.095	105.744	261.443	267.376	305.413	104.894	301.753	278.778	426.094	441.578	400.2	288.746	149.683	123.015	190.982	59.2658	91.8416	148.033	102.122	75.1786	67.9804	160.027	103.326	49.7331	318.045	121.357	142.766	113.611	78.2537	58.3607	150.495	239.501
200043_at	452.651	361.441	295	274.382	371.622	413.678	596.1	498.781	578.607	338.869	263.322	322.795	463.581	243.674	364.995	999.835	806.823	730.07	561.95	412.135	543.313	564.195	167.17	725.728	680.848	515.088	417.318	436.885	553.482	172.861	60.1041	302.035	69.27	40.2257	205.669	105.225	79.6506	19.6236	125.667	154.939	71.2766	370.092	162.604	33.2542	100.356	76.747	151.588	126.126	358.309
200044_at	431.746	505.157	243.376	396.688	540.802	528.656	540.618	739.928	771.598	393.785	359.276	441.535	588.229	297.186	605.144	744.954	528.121	812.764	920.262	455.912	325.763	354.302	305.776	896.952	538.911	525.055	457.415	456.644	547.43	131.386	35.734	235.928	42.5494	74.4729	126.413	81.7669	56.7116	20.6151	78.9112	200.752	93.378	133.487	350.845	26.8469	147.125	212.516	178.361	146.002	743.363
200045_at	89.008	75.2381	41.166	72.2649	83.8842	98.822	65.0232	42.1582	32.8947	36.5455	30.2029	60.8433	92.2639	52.0223	94.5327	122.896	26.811	66.154	73.4975	92.831	190.357	121.657	125.067	78.2286	87.5616	126.334	105.984	132.16	103.379	150.315	81.8182	225.178	59.4825	94.9165	79.7833	65.0293	114.162	58.0986	77.5124	65.956	37.8288	291.557	68.3341	65.289	102.901	40.6948	57.3842	101.838	81.3532
200046_at	63.8921	70.8844	49.1625	67.0234	122.115	118.817	144.812	164.643	94.0108	86.5571	20.391	65.2904	139.133	47.9219	133.658	467.039	123.323	223.916	164.533	278.75	487.288	693.715	90.2912	468.968	359.745	425.524	644.65	491.671	654.804	601.099	580.777	438.474	301.311	695.3	209.105	339.897	907.639	205.553	453.87	320.057	70.8668	275.545	88.3185	367.491	549.787	55.8919	186.758	133.476	62.9406
200047_s_at	1132.75	859.636	806.916	824.837	998.302	948.629	1418.81	1269.05	1921.51	640.116	712.373	841.066	1149.56	509.755	1198.72	1606.59	1312.69	1204.8	1025.29	1336.58	1240.72	1532.17	421.572	1551.19	1694.54	1179.04	1635.38	1531.3	2048.97	1242.4	802.729	1008.45	1140.97	1276.67	825.636	2026.3	1084.99	1918.67	1429.88	2041.75	756.607	810.547	2321.02	1405.91	1491.16	1769.4	809.991	717.118	960.259
200048_s_at	146.79	132.886	141.866	94.481	147.601	238.914	298.688	307.443	286.002	378.168	86.4387	150.359	331.444	76.4566	233.339	244.601	99.6561	262.391	152.54	197.721	309.327	283.323	484.819	344.653	418.252	411.091	280.917	371.535	370.72	439.291	115.47	310.66	270.777	357.654	218.323	153.157	274.281	149.535	269.385	171.697	101.336	482.429	307.851	174.252	224.72	136.503	239.741	111.313	104.702
200049_at	196.352	154.203	67.8571	90.0734	174.359	181.254	401.455	209.021	245.8	124.667	73.3029	161.181	326.531	85.2402	330.8	490.775	295.862	440.323	309.409	328.31	311.618	394.21	164.674	418.73	442.635	409.886	372.314	328.121	343.095	313.565	88.0086	362.931	116.552	108.308	234.156	100.115	125.3	67.1239	93.5977	140.824	81.2915	394.038	127.126	83.5208	211.577	32.1147	182.233	189.091	284.717
200050_at	588.51	475.405	401.235	445.828	506.063	862.003	1045.27	1427.13	1921.74	549.847	433.751	534.72	892.201	335.415	629.826	1298.86	1417.97	1726.53	1885.85	766.442	657.078	657.835	1363.16	1743.26	1115.75	912.899	1047.75	997	1153.76	277.362	18.3708	407.585	50.2867	90.2794	378.364	166.001	180.741	59.803	178.376	403.572	113.238	249.439	170.127	100.157	291.421	691.133	366.089	265.959	714.083
200051_at	642.694	671.259	721.251	685.456	632.267	436.884	1046.08	1365.71	668.268	1015.01	1578.68	793.278	506.587	1060.18	467.061	1316.18	1374.4	244.659	326.333	1482.22	1323.82	1302.72	1368.18	328.608	1554.56	1072.78	566.479	228.563	232.21	196.388	1366.53	626.421	1241.91	122.129	189.041	310.383	169.899	1604.41	150.887	860.909	708.629	1177.02	225.537	1444.23	190.508	1500.2	173.086	210.419	949.104
200052_s_at	171.131	176.942	91.8171	123.953	136.209	192.968	394.817	345.038	340.682	145.252	74.3549	145.519	255.241	113.756	207.703	671.462	179.184	521.136	252.856	307.193	497.066	467.69	138.828	541.915	432.639	470.03	484.215	485.346	508.703	212.764	62.4207	304.731	44.7748	43.1411	178.826	107.949	99.9314	37.1782	82.6226	131.014	63.9	416.297	103.583	39.2587	50.6988	40.5182	46.2979	87.663	198.937
200053_at	80.6668	84.2933	65.3584	69.6787	87.5013	109.242	73.5052	32.7369	57.0588	31.667	53.3968	70.2904	92.1318	47.5791	104.29	98.5659	29.5235	71.9292	77.4823	124.442	106.295	71.391	87.4968	133.543	105.28	105.733	175.523	128.101	105.29	61.7491	52.4642	58.0959	40.547	50.545	58.3301	71.982	63.6071	40.1597	65.0001	60.3126	32.0645	78.4629	68.0349	45.4079	44.8162	54.5348	51.3261	59.3521	44.044
200054_at	102.575	32.6758	32.473	30.0221	47.4597	81.6999	104.81	69.687	60.3829	23.8293	9.68031	43.239	177.57	23.7516	85.6153	138.745	33.3581	177.213	88.6734	59.5552	84.1272	132.248	54.1391	183.215	94.2035	123.738	149.825	160.76	265.426	58.4632	43.6017	103.716	36.0226	39.4357	44.0931	29.1879	42.1884	12.2654	45.5381	30.3362	16.7574	74.9086	75.1981	29.2857	47.5471	61.5013	40.4932	50.1324	136.424
200055_at	65.9173	112.269	131.582	76.6073	78.0237	217.135	83.6289	87.3239	48.9613	145.002	53.8943	89.6663	130.856	78.249	117.14	155.503	63.0984	74.4211	33.3646	153.466	210.162	241.194	70.0648	150.796	221.431	434.585	212.608	191.713	142.609	218.687	396.761	502.549	235.866	194.164	137.092	84.4032	228.896	81.7221	172.15	56.3097	46.9476	842.811	574.843	119.965	102.189	48.407	80.2747	184.492	42.5885
200056_s_at	84.0504	102.235	56.0969	48.0579	71.314	148.664	44.2544	45.0066	46.0274	46.0075	15.408	43.7739	77.2593	34.6009	89.1407	78.9153	20.8099	52.7222	46.2829	54.0332	99.7908	137.925	136.613	182.22	85.7578	96.3852	156.778	167.924	237.567	517.409	543.97	416.991	601.355	782.176	278.544	586.557	619.363	510.728	485.681	459.86	181.527	233.867	379.025	364.085	675.257	229.576	240.196	173.391	185.068
200057_s_at	2763.5	2820.5	3025.6	1941.47	1945.45	2209.16	4358.95	4189.04	4497.61	2694.59	2068.6	2363.67	3014.88	2024.05	2472.75	6420.75	6889.11	5334.07	3578.68	2475.65	3273.86	3158.56	3750.38	5216.95	5936.75	3831.76	2930.08	3381.88	2305.12	848.668	158.424	855.173	313.285	201.62	696.73	443.684	86.1511	149.197	622.965	2141.3	706.125	688.497	1981.94	97.4996	491.771	1233.31	1155.03	551.22	4028.3
200058_s_at	95.1899	112.254	92.4124	76.8266	97.4636	158.694	124.83	95.1854	108.166	86.3569	38.6974	71.3284	126.726	52.2971	100.931	189.647	43.4704	167.618	94.3887	85.5919	160.758	127.263	51.0545	152.89	191.995	226.98	133.784	142.293	126.122	84.0702	41.6185	241.969	36.7101	23.4373	82.1662	45.9101	27.2038	20.0755	29.354	40.9711	40.6842	305.907	18.8698	30.5762	29.2471	14.9593	36.0034	49.849	72.439
200059_s_at	642.854	447.568	544.248	571.426	761.088	798.159	753.437	734.432	891.281	347.354	445.653	657.425	915.093	423.628	1081.28	1009.84	640.868	1026.2	693.137	785.043	587.44	742.63	450.585	1741.09	1376.69	1058.53	1128.04	1026.78	1219.44	363.504	140.41	447.702	224.565	344.739	345.825	137.611	442.447	194.033	335.476	397.494	216.065	287.08	287.429	291.984	367.865	314.371	456.135	227.44	1290.54
200060_s_at	182.945	134.924	68.5502	95.9596	89.4361	345.014	115.862	111.616	80.4417	37.9225	74.5569	131.262	264.342	96.8414	155.54	327.151	80.0643	404.724	176.429	130.381	238.951	301.012	54.8596	361.914	235.986	259.01	286.177	321.333	605.409	72.9977	59.559	307.561	36.2898	54.513	138.294	53.7449	64.0794	16.373	51.4243	45.4347	32.8344	291.377	263.286	29.5526	124.506	23.996	48.6148	143.95	129.647
200061_s_at	7164.79	6359.35	7232.18	5276.33	5681.73	4672.8	10332.1	8166.56	6489.04	6513.43	3297.45	4607.24	7108.97	3421.19	5618.26	9044.3	7434.63	6761.94	6170.15	6093.26	7825.05	7163.06	2953.81	7017.51	8512.53	7842.08	6086.61	6840.6	4468.02	2794.68	2043.44	2821.99	2558.95	2305.27	2987	4043.2	2439.11	3918.1	2745.34	6579.39	3642.27	4573.72	5761.78	2472.39	3021.35	4270.36	3051.4	4369.64	7446
200062_s_at	4568.15	3867.19	5593.44	3193.95	3693.17	3368.7	7316.84	5815.73	4552.22	5663.36	2472.65	3067.82	4625.15	2196.15	3526.72	6341.94	5605.08	4617.32	4084.13	4775.12	5531.74	5574.63	1956.13	4302.16	6604.48	5623.2	3787.35	4594.62	3410.84	1577.94	1119.67	1582.13	1636.57	1417.71	1378.77	2784.08	964.976	3099.21	1509.48	4921.9	1890.17	2419.65	4056.93	1848.2	1831.58	3387.26	1711.58	2241.17	4858.81
200063_s_at	2134.43	1904.42	2008.58	1403.62	1631.12	1522.54	3860.8	3184.22	3555.27	2674.71	1210.11	1403.63	2164.67	1004.43	1475.29	5794.97	6277.26	4410.26	2519.56	2328.01	2482.4	2772.28	3146.91	3832.01	4995.94	2886.81	2520.11	2925.97	1872.12	463.501	74.7926	483.564	260.464	84.6011	415.703	386.703	99.6163	71.5536	377.625	2050.95	412.116	616.974	2029.06	36.2925	380.869	570.51	850.786	326.989	2183.51
200064_at	601.271	704.127	662.96	506.953	377.353	680.678	1277.82	1159.53	1551.65	680.287	570.349	434.612	431.309	336.104	431.523	2363.99	1703.26	1349.51	630.536	1470.78	1718.01	1894.54	793.593	808.977	2097.05	1136.29	1440.96	1398.83	1438.7	596.436	160.546	337.516	378.908	268.465	178.007	599.227	269.976	447.96	426.39	1090.34	214.173	316.285	509.87	272.589	380.026	907.019	249.635	189.077	514.257
200065_s_at	744.881	897.44	742.041	905.921	1121.29	1195.74	1661.9	1411.43	1645.97	615.898	1221.44	1273.23	1220.06	1119.54	1575.21	1389.95	768.055	1196.99	1075.35	2531.7	1641.59	2335.19	1352.68	2629.16	2830.41	1985.57	3337.45	2550.97	3919.55	5011.87	4045.98	3660.71	3886.63	5404.5	1862.66	9166.24	4398.52	10199.7	5006.66	7522.8	2623.21	2037.92	7409.83	6681.01	4921.56	8821.86	1941.86	1629.41	1322.17
200066_at	409.331	425.429	477.99	429.436	209.774	620.018	274.462	195.947	543.671	375.078	534.737	378.176	447.483	179.308	476.715	415.471	260.547	703.532	199.756	545.219	348.436	448.545	86.8771	781.35	724.794	451.935	706.732	572.816	1022.83	1072.3	201.946	1058.83	743.73	1232.6	663.139	579.531	244.725	1356.66	886.532	993.076	530.524	747.607	448.799	1524.08	1051.64	86.8258	564.132	333.615	322.173
200067_x_at	929.723	908.037	1158.67	1016.12	1136.59	936.728	1019.99	1291.37	1472.61	551.118	610.927	850.684	1209.4	625.7	1132.78	1289.62	1070.2	1029.14	1055.37	1201.95	1089.74	1582.68	116.718	1833.76	1648.12	1266.41	1564.14	1382.86	2201.15	3587.02	3191.54	2719.36	2640.3	3588.26	1651.97	4584.1	2860.43	4217.85	2834.14	3938.26	1692.72	1776.79	5253.13	3142.94	2808.59	4477.18	1426.14	1673.64	1304.55
200068_s_at	3529.33	2928.68	3439.8	2259.22	3006.09	1934.67	6937.83	5826.49	5248.13	2085.95	1842.53	2573.28	3946.15	2086.46	2890.34	6304.03	6824.71	4551.96	4318.39	2972.44	3996.67	3900.37	3844.45	5669.19	5777.91	4334.8	3548.17	4484.51	2921.77	1008.87	278.131	815.08	597.633	318.853	905.923	1757.87	395.6	505.892	853.049	3305.34	1158.43	1267.01	1299.73	384.829	713.557	1144.62	1740.94	1238.84	3817.4
200069_at	137.979	133.577	98.1021	158.834	140.454	276.965	181.056	57.4895	100.815	74.1551	92.0599	168.407	358.075	110.435	220.949	353.915	52.4945	545.757	142.5	213.128	116.488	165.056	96.2012	300.435	240.92	420.452	316.627	292.787	243.725	83.4448	54.3468	71.1324	58.294	54.1005	219.025	92.7566	74.3249	35.0724	59.1575	39.4421	39.4446	371.339	75.9646	74.5662	55.9966	25.524	42.237	138.637	100.566
200070_at	553.988	723.925	748.723	714.322	1040.23	1065.98	504.908	817.782	869.629	316.94	543.099	629.758	887.458	271.511	1201.93	571.877	243.061	515.849	571.928	899.373	516.986	729.998	70.4388	2088.54	988.385	839.829	1279.94	1065.83	2215.88	6223.62	4969.88	4775	4561.37	7034.89	1661.36	8243.62	6095.73	8127.85	5470.19	6607.89	2365.21	1861.3	7094.85	6390.62	5772.53	8639.26	1325.19	2613.89	789.893
200071_at	1144.02	743.637	705.32	831.674	922.531	944.809	1405.71	1803.42	1815.9	971.297	749.463	874.952	1212.17	631.801	1021.04	1524.09	1266.57	1220.96	1484.45	737.422	961.466	1054.63	189.829	1523.45	1530.91	1177.25	1085.73	962.486	1460.15	573.471	162.386	623.523	236.829	168.179	472.533	276.838	387.704	170.687	233.415	572.694	415.004	523.626	685.704	327.45	253.861	367.049	658.184	412.478	1336.51
200072_s_at	394.515	667.303	334.229	470.185	306.663	670.913	573.415	655.516	1027.02	399.466	805.144	655.743	578.024	572.684	693.744	904.098	596.941	1323.64	832.708	469.384	713.861	945.466	494.716	1153.2	776.017	741.804	741.479	750.308	995.516	322.465	186.745	635.859	104.337	105.609	343.852	78.3792	69.4067	84.9676	269.333	207.167	201.566	869.037	758.495	60.546	175.969	108.025	282.695	381.266	851.509
200073_s_at	1551.04	1607.27	1422.98	1503.15	1689.99	1363.55	2783.8	2137.67	2763.69	1767.88	1142.09	1236.12	1923.05	858.499	1238.27	2410.75	2934.32	1957.83	2191.73	956.263	1154.2	1219.27	1339.76	2089.7	2124.35	1621.46	1101.61	1358.68	1026.11	476.683	108.657	478.22	172.608	183.983	568.933	225.238	141.682	99.0759	113.867	900.694	443.247	510.034	977.273	164.123	348.656	706.678	755.405	508.374	2214.62
200074_s_at	3350.97	2727.79	4101.93	2396.63	2480.23	2415.91	7305.94	5403.65	5090.44	4574.96	2162.01	2525.83	3880.61	1838.09	2639.3	8045.64	6940.77	5705.02	3841.08	3719.51	4891.39	4468.21	2459.34	5264.05	8237.21	5609.56	3471.52	4000.17	2671.89	1031.77	209.079	1366.78	695.889	417.199	959.439	616.964	253.253	593.744	544.451	3163.49	1172.74	1758.4	2076.02	590.326	650.905	1256.28	1281.12	1291.97	2999.96
200075_s_at	185.588	149.383	234.398	149.693	92.3466	181.502	96.3948	126.985	126.623	142.9	119.137	152.358	192.47	117.812	199.465	263.796	71.0299	176.292	98.6665	245.349	445.861	395.209	165.563	416.022	477.386	324.511	401.704	307.12	339.498	4274.33	6264.29	3993.84	4671	5269.35	1879.7	6424.53	3513.9	5689.62	4502.83	6049.23	1666.22	2243.55	4841.06	3696.3	3802.8	9206.11	1474.77	1036.34	256.066
200076_s_at	47.135	56.4658	40.6416	54.8467	55.2247	71.1428	53.1487	32.1092	22.0887	29.3113	25.3908	41.753	48.3791	35.9418	68.8361	92.2774	28.8645	50.3545	55.8929	39.6174	94.15	86.7158	37.8258	80.7037	58.6033	109.376	117.195	95.7289	98.1228	119.505	73.2252	158.152	39.4439	109.308	69.8637	63.7103	100.627	43.4394	72.2846	43.1015	30.4818	171.725	46.4173	50.4998	77.0591	32.9949	54.5275	63.2576	51.6769
200077_s_at	1204.13	1181.18	1239.27	1153.67	1348.79	1322.65	1923.48	2460.56	2344.93	682.244	839.784	1300.08	1535.99	1026.4	2157.77	1713	1132.94	1310.06	1551.76	2158.21	2090	2850.56	603.246	3291.13	3564.29	2720.73	3363.2	3534.82	4519.04	7294.66	8210.08	6454.53	6213.46	8429.02	2384.81	9286.99	6229.91	10640.8	6409.41	9517.14	2806.86	3488.3	11852.8	8084.32	6185.83	11082.1	2591.47	3068.58	2130.33
200078_s_at	82.0967	84.7513	48.9285	61.8803	75.6567	111.641	91.0216	61.5544	30.4984	36.9129	19.2664	67.189	129.799	47.2186	172.587	66.5407	19.2318	104.834	53.4959	54.2176	124.613	72.6486	53.8893	167.288	79.9231	168.646	128.577	257.296	115.933	227.433	102.923	273.07	92.1929	225.533	166.245	110.679	362.84	73.7866	166.435	73.7818	67.6097	207.261	140.721	202.495	225.862	86.0783	72.4647	155.198	214.971
200079_s_at	116.724	132.625	70.7579	107.26	92.3286	230.124	129.686	69.7673	72.0872	80.4748	74.719	124.424	211.19	77.397	196.239	340.176	87.5985	233.84	120.502	259.905	380.01	334.475	150.72	304.995	306.386	447.789	375.876	416.403	209.115	258.141	70.7334	472.008	85.4783	139.744	101.61	117.231	143.44	92.5357	134.505	179.365	61.7489	475.044	116.922	143.5	192.274	85.135	58.7322	144.208	218.206
200080_s_at	4742.46	3899	5205.2	3893.69	4737.19	3215.07	6215.87	5303.98	5093.71	3710.87	2331.53	3274.05	4962.96	2265.7	4382.84	5560.05	4991.73	4057.22	4538.61	4423.29	5032.99	4492.9	1943.37	5064.12	5302.09	4483.03	4630.8	5323.49	3987.82	4497.91	3579.05	4757.35	4127.33	5257.82	3906.92	4435.7	3986.84	5556.48	4280	5414.02	4435.48	3703.5	4751.78	4431.71	4514.39	4346.74	3573.77	4416.67	4913.94
200081_s_at	3588.63	3028.31	3954.22	2633	2651.52	2879.57	6830.87	4818.84	4424.9	4366.9	2032.43	2497.93	3972.92	1802.25	2675.34	6615.26	6727.67	4721.34	3731.04	3046.67	3582.5	3381.21	1855.52	4588.51	6172.25	4426	2588.04	3450.32	1994.01	663.013	332.783	1011.67	888.591	426.361	922.968	578.692	271.75	756.803	549.097	3214.15	1037.98	1400.17	1919.64	355.033	548.733	1425.86	1237.91	1279.2	3656.51
200082_s_at	1966.19	1867.22	2489.85	1474.3	1494.18	1905.08	3604.17	3201.09	3089.9	2183.42	1458.49	1593.37	2237.39	1181.46	1671.86	4526.73	4554.15	3192.31	2145.04	2888.55	2551.61	2838.51	1107.97	2599.41	4816.95	3136.69	2205.67	2411.23	1807.78	522.396	215.539	774.235	400.097	323.922	510.982	265.361	281.955	373.796	431.536	1748.07	464.711	898.973	1184.62	335.127	393.351	584.549	644.567	549.356	2107.42
200083_at	211.453	210.978	167.803	218.355	319.56	471.187	553.047	239.062	532.966	93.4872	187.222	277.471	428.767	201.608	366.253	947.097	589.884	769.809	470.257	700.191	672.669	803.401	776.43	1002.96	1050.89	729.029	759.803	747.324	799.164	212.88	77.6316	247.968	68.438	100.355	111.364	112.932	154.414	34.8036	128.438	304.536	82.7706	177.957	79.4428	80.7425	129.023	55.6699	154.736	148.938	672.636
200084_at	706.992	500.091	409.788	357.451	469.874	542.793	569.492	488.087	805.226	460.531	303.612	357.161	471.435	265.022	428.976	634.129	482.899	585.467	503.471	517.638	463.507	690.358	551.29	670.925	692.241	438.598	831.013	662.975	1021.8	546.502	251.514	468.222	452.313	586.309	318.243	674.578	357.447	725.027	573.899	701.443	285.068	397.025	428.277	509.794	719.392	490.672	335.517	230.908	648.466
200085_s_at	60.9587	69.8435	52.6051	66.9886	55.2714	115.702	130.216	81.8034	90.3717	42.6687	24.0952	51.0841	83.8624	34.9155	96.5215	143.385	45.3434	67.8476	57.5767	140.146	418.703	492.816	31.3045	98.9936	201.783	267.239	256.234	246.473	147.302	538.573	1089.12	401.807	581.767	828.714	197.439	968.272	672.641	234.464	447.915	148.513	48.2594	962.769	911.07	286.358	336.566	99.7915	90.9497	196.889	49.1092
200086_s_at	287.856	146.219	158.05	134.279	141.648	444.52	343.339	164.979	183.123	160.972	75.7645	144.447	310.996	112.617	164.063	389.317	225.585	275.881	159.812	144.921	332.731	366.254	127.631	354.359	467.38	593.554	198.36	289.344	277.352	62.2283	32.3492	231.804	33.6917	57.2316	108.568	56.7833	46.3175	36.728	61.7542	76.2825	26.2561	376.984	64.7264	33.3251	54.4882	36.0378	52.4945	98.9987	324.668
200087_s_at	1974.36	1857.26	1554.78	1441.45	1469.27	1325.69	3727.39	3751.56	3502.93	2217.68	1379.39	1828.55	2597.18	1516.55	2057.71	3978.7	4262.2	2920.03	2642.02	1921.92	2455.75	2585.21	2098.83	3675.37	3895.75	2609.23	2430.48	2933.55	2258.26	561.425	223.839	773.697	304.561	279.799	703.835	834.863	280.729	300.861	693.081	1664.83	637.947	745.898	2112.84	134.441	708.86	574.123	1396.49	891.486	2929.19
200088_x_at	1913.14	1860.81	2055.69	1516.23	1451.43	1924.89	3585.73	2839.35	2847.23	2215	1559.23	1430.33	1866.93	1043.02	1378.51	3039.76	4033.7	2761.17	1804.7	2167.7	1853.79	2429.39	1857.41	2201.79	3635.8	2499.09	1695.34	1726.33	2224.55	468.629	294.859	536.108	506.885	365.008	543.854	618.494	265.081	354.725	547.993	1446.43	450.622	1011.98	1915.82	353.79	423.492	1148.52	702.263	692.922	2057.57
200089_s_at	3055.28	3039.93	4071.82	2620.51	2252.08	2754.74	5549.61	4243.22	4029.32	4251.82	2141.06	2321.47	3178.2	1739.05	2454.34	6715.99	6703.97	4748.18	3349.75	3216.83	4167.18	4205.16	2556.14	4537.17	7107.94	4477.83	3143.91	3534.4	2565	756.792	563.621	1116.75	777.782	445.733	1017.86	877.789	298.419	890.247	557.572	2853.16	969.894	1738.02	874.307	524.887	833.631	1334.03	1106.8	1229.85	2756.02
200090_at	965.055	1096.66	1058.35	900.722	1141.9	1082.76	1217.65	1736.88	1917.55	1294.88	1349.63	1140.04	1561.19	746.958	1073.29	1592.01	942.915	1472.37	1791.39	1033.98	748.554	857.134	91.4539	1502.78	1516.89	1519.32	863.751	820.623	1017.28	208.609	55.4498	482.993	40.7573	41.9025	243.172	73.6216	35.6565	98.8198	124.622	400.248	170.336	152.336	387.992	54.6192	57.2143	219.713	88.0156	179.887	1070.7
200091_s_at	4827.65	4576.17	5843.5	3226.68	4127.31	3274.91	6426.09	5046.69	4101.29	4760.51	2121.63	2912.24	4492	2366.32	3189.55	5606.35	5966.88	4254.18	3932.23	3863.81	4689.73	4112.82	2522.71	4213.38	4890.17	4342.01	3406.9	4513.51	2954.53	2114.62	1341.83	2351.12	2785.71	2446.84	2345.73	2881.26	1612.63	2973.39	2575.41	4431.42	2432.37	2711.33	4189.82	1994.5	2599.77	3527.51	2583.24	3128.85	4685.87
200092_s_at	5745.55	4886.81	6505.3	3887.29	4371.53	4239.43	8789.47	6785.36	5491.8	5927.3	2799.77	3659.78	5743.34	2642.39	4222.19	8673.96	8443.33	6166.33	4860.75	4277.11	5551.54	5489.37	3224.62	6027.12	7971.67	6156.64	4066.6	5474.92	3067.16	1349.34	799.575	1838.58	2068.15	998.209	1836.47	1933.4	583.55	1581.62	1314.59	4597.65	1878.89	2631.89	2988.64	1059.57	1609.89	3069.46	2344.75	2744.2	5775.29
200093_s_at	662.185	806.923	763.28	532.02	594.553	1193.39	1557.74	1403.54	1797.55	1472.2	673.414	762.118	985.098	686.187	741.116	2052.81	2027.26	1842.13	921.398	746.04	1000.7	1028.55	290.385	1068.99	2077.34	1225.05	633.27	739.102	840.163	226.351	53.3838	324.874	64.4566	106.126	242.457	88.908	84.9688	19.9284	118.579	270.819	98.2622	510.153	110.161	31.5024	134.194	45.9903	149.81	170.178	1019.33
200094_s_at	1319.09	1419.48	1598.28	1118.07	1159.35	1495.99	2659.55	1956.2	2505.07	1903.34	1072.36	1191.52	1597.74	773.927	1520.06	2220.39	2285.88	1982.44	2119.89	2604	1889.4	1743.82	675.37	1486.66	2279.4	1967.78	1654.76	1732.53	2513.74	719.961	736.688	760.363	930.71	868.2	468.707	1505.15	603.349	1370.41	920.61	2321.49	597.429	893.707	2166.02	1106.42	742.51	2112.96	756.763	647.023	2028.49
200095_x_at	4902.99	4356.23	5118.13	3705.62	3749.24	3545.65	7664.21	5780.64	4957.23	5377.93	2279.39	2928.03	4997.6	1781.01	3622.91	5666.33	4867.18	4572.73	4143.62	4055.57	4880.65	4566.68	2720.61	4334.34	5435.14	4961.91	3584.64	4614.21	3038.89	1464.91	1015.44	1488.03	1470.51	1053.83	1665.63	2628.27	931.045	2130.13	1311.65	4045.18	2043.31	2247.89	3810.12	1434.05	1426.05	2373.21	2148.93	2170.49	5357.9
200096_s_at	600.798	452.038	416.456	704.329	803.538	595.901	660.269	504.355	607.612	356.182	559.113	697.758	805.659	546.621	962.682	527.272	290.246	459.772	700.998	791.81	586.763	874.759	285.862	1000.61	824.273	1012.1	1292.33	1274.46	1484.4	1083.08	566.305	809.864	618.008	1135.61	241.647	1805.51	836.362	1035.57	958.509	1172.67	349.957	382.113	538.648	1093.33	817.373	575.719	522.863	276.015	676.92
200097_s_at	2182.98	1947.09	2782.04	1912.42	2314.09	1963.48	3635.12	2752.68	3545	3016.58	1365.52	1806.7	2784.97	1136.54	2465.14	3587.27	3390.39	2712.64	2594.55	3064.49	3361.46	3617.12	900.778	3195.01	3448.35	2618.85	3354.28	3662.38	3406.5	3625.61	3373.91	3276.81	3345.91	4261.19	2394.56	4386.89	3102.43	4581.53	3585.58	4749.86	2537.54	2246.12	3711.22	3579.62	3436.68	3897.94	2305.24	2577.23	3007.05
200098_s_at	405.6	398.849	437.203	486.57	526.182	671.701	788.661	762.2	873.298	290.48	546.115	568.824	896.912	510.713	418.505	817.649	427.138	891.164	775.017	400.165	380.812	385.477	78.0503	526.042	554.91	687.122	399.38	454.043	575.467	71.9988	43.7086	183.433	62.0478	16.1003	177.653	63.6116	43.0483	27.6148	55.0639	135.61	67.6814	316.037	65.3508	40.6378	36.5634	17.3965	117.355	169.855	1424.42
200099_s_at	5336.85	4599	6172.53	4120.31	4478.97	3762.24	7629.59	7063	5305.27	5972.62	2981.57	3814.42	6200.93	2682.26	4268.83	9058.31	8210.8	6539.34	5283.84	4788.43	6221.43	5382.36	2489.49	6120.37	8285.63	6778.75	4559.59	5259.25	3035.62	1242.85	737.915	1546.81	1496.45	924.283	1348.48	1931.12	710.746	1854.17	1114.67	5224.59	2092.35	2426.15	2295.03	1019.58	1153.61	2935.98	1926.54	2202.3	5337.5
200593_s_at	793.029	967.39	955.565	617.163	490.589	927.427	918.897	1263.87	1062.4	1518.3	1021.02	801.595	899.465	653.679	687.762	1349.57	1029.88	1570.44	710.302	576.032	697.408	872.973	233.064	1629.66	1320.83	954.671	1071.55	969.683	1128.52	405.845	63.61	487.803	120.606	99.2622	461.067	99.3851	139.464	107.03	130.096	211.133	144.027	698.353	347.482	112.323	155.912	94.8817	397.879	255.993	1305.28
200594_x_at	2900.57	2494.86	2587.45	1838.42	2201.52	1888.68	4259.99	3968	4301.36	2613.38	1543.57	1931.94	2953.09	1418.46	2154.56	5371.26	4916.51	4031.67	3365.28	2255.16	3133.55	2796.5	1531.41	4136.56	4906.08	3220.97	2468.41	2803.16	2210.14	930.762	278.124	1116.8	408.168	411.243	1120.18	1221.39	199.62	482.667	1123.98	2387.91	1048.81	1212.44	1384.58	289.25	622.143	752.816	1242.1	1006.2	3045.61
200595_s_at	2744.16	2074.03	2754.34	1865.89	2034.34	1778.7	4026.75	3680.99	3712	2662.52	1678.13	1912.81	2766.57	1445.65	1994.62	4347.33	4435.7	3003.83	3060.63	2666	3141.68	3144.81	1234.17	3615.77	4124.59	2825.78	3123.2	3448.56	3042.89	1243.55	470.761	1038.72	810.79	954.49	1235.34	1983.1	630.035	1380.26	1427.12	3148.41	1570.24	1472.51	3158.87	1096.56	1428.74	1088.89	1282.83	1242.93	3102.87
200596_s_at	179.222	114.989	83.5972	138.277	158.044	124.759	413.444	143.927	244.656	244.43	95.5653	167.058	266.872	112.625	271.165	351.134	111.717	435.024	264.368	375.666	292.775	244.49	145.181	421.517	250.024	435.885	500.385	418.9	205.173	93.3347	63.3418	130.825	95.9969	49.1153	95.22	70.0647	68.1567	89.8975	60.0807	192.589	95.9785	174.809	60.0072	130.723	69.5966	61.7622	75.8	86.0502	231.908
200597_at	270.961	155.315	99.2337	106.119	217.075	245.505	505.823	293.297	547.764	181.564	144.629	265.159	579.06	170.165	346.877	763.219	307.554	792.572	510.776	387.359	545.446	681.552	243.843	874.592	656.481	636.271	708.326	811.756	832.239	206.963	80.1416	280.918	58.5262	50.3878	256.996	81.4744	59.3207	32.4778	73.318	134.846	98.9807	375.363	122.409	58.9106	129.746	26.2201	88.0728	104.073	537.681
200598_s_at	486.541	559.54	162.897	211.907	201.227	341.289	298.876	376.339	296.047	219.461	512.437	493.32	596.889	329.112	588.352	400.374	179.62	429.41	238.436	330.34	373.227	242.98	174.426	934.702	464.14	577.744	701.65	871.782	333.041	78.6136	60.1829	107.801	70.3042	34.3846	153.748	91.1435	60.7061	49.3822	85.0764	207.57	62.7467	168.87	149.666	83.7369	91.8204	94.2959	191.539	107.25	1257.68
200599_s_at	685.592	850.773	485.482	601.502	433.073	635.507	950.032	1417.25	1130.28	442.264	770.04	768.175	931.896	682.702	710.768	944.739	609.001	1086.36	538.847	472.262	527.696	515.963	264.384	1477.77	878.331	756.248	862.907	1249.9	839.939	128.579	57.2034	331.64	35.3793	28.2834	213.796	136.678	52.268	29.2169	144.932	228.311	94.9702	325.168	569.804	28.575	280.051	124.457	525.62	247.682	1176.86
200600_at	2200.86	2087.31	2345.86	2251.11	2562.21	2029.43	3217.31	2529.43	3306.45	2134.58	1857.73	2209.95	2543.19	1964.8	2569.48	3955.74	3835.41	3434.68	2636.34	2071.83	1775.56	1942.09	4332.05	4380.55	5072.07	2779.96	2233.36	2445.24	2118.09	185.187	85.9357	590.391	402.544	125.064	296.221	222.501	366.08	95.4773	430.639	1430.5	531.878	312.656	1761.29	104.332	634.767	2089.39	1554.25	811.59	2769.79
200601_at	45.9846	43.284	29.7955	40.4231	56.664	61.095	55.7933	19.6989	29.9933	33.81	23.3221	48.0349	61.3616	44.9148	82.8277	50.281	21.4822	71.9572	51.4526	42.9245	47.6944	52.1264	86.9671	112.32	45.9377	92.9338	107.753	104.382	86.4867	46.0409	40.8597	63.4198	29.7699	49.9091	93.6302	65.4056	40.8728	23.1826	59.2883	27.1019	26.2247	169.84	33.9237	53.5846	90.3363	20.8768	49.1732	71.4075	153.403
200602_at	1182.66	1374.98	1009.2	1105.23	1759.72	1014.48	1505.62	1646.98	1894.27	1570.32	711.571	1452.1	2326.13	1395.89	1924.37	1267.03	958.831	1766.96	2181.5	1392.15	1215.46	977.592	2310.76	2303.3	1644.41	1805.42	1340.93	2405.93	1152.07	154.943	114.075	51.4411	65.0552	41.312	120.501	259.304	137.347	24.1907	410.931	605.788	259.338	53.2929	2012.42	57.4099	254	121.666	1104.39	308.24	1723.15
200603_at	1145.46	1187.78	1127.88	1158.11	1452.74	1210.15	1521.72	1407.96	2127.22	476.715	792.944	1122.89	1575.45	915.668	1389.82	1467.98	1829.72	1625.28	1475.77	1067.97	1139.19	1512.31	235.229	1885.78	1899.16	1240.16	1814.48	1686.47	1680.32	622.512	255.77	446.057	365.344	491.507	439.476	775.774	452.219	473.607	702.5	912.158	360.051	291.753	1292.85	434.325	642.673	290.139	1072.46	644.149	1714.16
200604_s_at	209.14	281.904	150.43	365.672	288.588	319.781	78.7646	52.733	67.5895	41.2063	215.073	300.531	311.179	250.548	486.483	90.7176	52.4685	583.762	128.834	207.531	217.018	130.787	243.668	787.556	209.695	360.781	957.802	660.803	329.516	359.599	62.4097	255.991	52.0173	448.376	157.863	111.093	910.769	83.795	226.481	132.036	69.6432	118.4	66.5214	144.987	410.971	43.8088	116.065	141.317	747.24
200605_s_at	809.058	906.268	667.417	1012.85	796.504	1111.61	1065.25	1215.04	1109.45	190.616	631.678	954.498	1216.5	891.213	1212.02	991.31	1384.32	1152.23	1233.75	619.073	699.544	1195.62	342.264	1716.25	1309.13	764.343	1552.22	1323.1	1714.46	513.021	227.645	437.001	312.758	397.519	353.9	787.587	359.813	355.254	558.134	581.796	242.116	181.27	722.981	285.331	596.061	569.283	958.674	524.579	1327.32
200606_at	38.1979	127.902	25.3594	196.013	74.0498	115.679	35.4914	29.8566	10.3435	29.4626	82.4698	82.5942	70.2852	102.843	78.0664	35.0145	38.5661	37.606	31.1578	49.7542	45.0156	41.4723	67.4563	33.8138	31.4552	27.2702	36.6093	40.7667	52.7932	95.8018	60.3325	135.398	172.059	79.2079	54.3556	85.2136	82.8131	79.8839	84.2788	120.024	69.5555	80.914	115.874	51.065	132.288	72.8861	46.6002	58.984	29.9847
200607_s_at	294.06	187.46	359.256	228.721	176.995	291.826	172.438	70.471	85.3598	250.691	163.143	141.473	127.737	151.784	126.644	156.862	306.23	218.925	25.9265	312.23	96.0844	191.865	82.3533	456.211	271.181	173.971	563.851	324.381	152.45	543.089	131.064	441.927	293.052	888.712	590.479	106.609	571.703	409.837	850.929	206.472	220.781	203.442	176.376	1267.54	731.228	701.746	125.71	307.833	61.5292
200608_s_at	298.574	229.521	145.875	208.381	323.239	484.29	284.889	260.273	295.853	263.575	171.806	236.483	348.017	153.833	340.024	440.169	215.401	406.687	283.253	318.944	269.111	372.719	330.866	527.624	527.758	399.271	455.205	464.344	608.058	577.113	260.036	730.693	353.37	446.586	594.437	232.691	315.169	402.574	357.281	455.06	375.278	543.911	998.091	412.971	341.504	512.086	344.355	344.596	348.473
200609_s_at	277.724	254.821	214.236	319.671	484.692	442.235	386.583	295.006	221.79	297.462	252.506	456.157	553.346	417.81	741.673	383.927	140.059	475.543	531.846	231.639	288.604	316.995	1322.73	731.343	507.632	731.169	473.654	453.645	597.016	76.4571	77.9655	220.008	77.3108	131.455	130.434	110.473	120.272	62.8386	120.488	138.651	105.908	270.18	200.225	66.3766	207.598	80.2546	301.304	183.275	837.776
200610_s_at	425.912	256.267	166.1	220.633	167.211	583.516	407.656	621.769	716.128	312.261	165.488	214.177	390.483	126.049	258.337	1011.97	714.227	1029.16	444.627	591.074	588.377	719.76	246.255	912.385	908.086	548.917	879.007	805.301	1542.89	242.033	43.5693	263.379	50.8847	91.3101	235.145	108.65	71.1722	45.9464	271.725	199.101	82.6342	316.751	505.776	63.118	253.851	19.0837	190.431	131.308	306.301
200611_s_at	63.7361	127.379	154.881	92.7786	126.214	178.021	73.1507	47.6283	67.3316	59.7713	47.3798	74.909	124.904	60.9055	87.3589	148.25	46.6346	58.4782	55.5809	48.1803	104.09	124.14	56.7877	239.945	282.262	312.241	260.108	96.1679	164.823	53.1579	59.0854	88.7829	46.4995	67.0663	85.7029	70.3843	77.376	37.6965	45.0696	76.5712	73.2293	137.037	55.5017	60.8861	40.6136	40.8161	35.4442	45.9497	68.6867
200612_s_at	49.153	69.6206	80.6788	67.4001	69.9041	72.7101	48.6235	53.3599	58.518	27.4906	28.4056	47.8316	59.1151	40.9488	76.1231	74.6089	29.8677	90.0437	41.9277	170.917	168.294	195.008	60.3945	134.829	96.284	121.27	210.958	162.341	133.718	1118.59	316.631	618.152	411.236	893.805	189.771	752.071	730.295	604.931	676.645	475.369	142.271	320.354	122.351	748.216	599.872	96.4674	107.682	315.007	53.6777
200613_at	34.2312	32.4796	42.1123	33.0898	37.8049	35.674	32.6919	24.4892	55.9823	25.3579	21.0733	28.1564	33.1871	21.7057	41.403	62.7193	33.1399	38.9989	28.6447	45.4694	73.9755	75.2078	36.1575	56.8115	87.8745	71.2459	83.7196	68.5083	56.1017	253.145	102.185	354.255	78.0087	298.699	93.2606	105.342	185.72	89.0519	186.04	115.169	47.1053	376.421	64.1766	126.313	126.917	45.4557	46.6096	87.0653	62.1325
200614_at	1050.86	1172.56	1142.75	909.21	1429.95	944.811	1741.22	1449.95	2208.01	272.644	943.492	1245.25	1473.84	1077.9	1604.23	1571.85	1236.06	1378.73	1561.73	1740.39	1249.37	1783.08	2206.75	3040.25	3144.7	1796.85	2610.66	2463.21	3350.64	3774.91	1778.77	3418.23	2469.93	3517.97	2857	4887.7	2379.58	5411.81	3117.22	3836.18	3051.89	2693.86	1780.66	3183.66	2420.29	3817.28	1734.44	1826.42	1535.13
200615_s_at	60.1101	68.5251	106.828	66.2872	60.1919	78.2056	43.5847	63.4395	88.5377	35.179	62.4697	61.9653	64.4696	56.1427	65.2045	86.7588	60.2627	55.4013	37.9399	171.36	202.78	234.441	69.2089	87.8609	100.011	100.203	232.427	148.458	116.725	1958.08	221.816	1391.73	728.326	1585.55	200.084	1215.21	534.625	924.341	1315.53	1019.09	291.52	421.958	320.206	2028.41	1084	242.445	113.184	250.115	41.8209
200616_s_at	55.5269	93.135	41.6988	44.481	74.9628	73.0587	106.813	54.7173	48.7349	12.5567	24.7947	42.1383	86.165	29.7099	49.6728	83.3395	20.7805	59.3697	28.873	42.8693	87.6813	70.1717	49.0311	104.201	42.9539	95.8244	111.854	144.701	57.0637	20.183	12.7669	20.349	12.22	9.49675	11.3137	19.0151	14.2201	22.8162	18.0103	40.2161	10.716	31.2785	15.9581	11.9036	20.3993	18.4583	17.9906	21.5303	30.6269
200617_at	180.009	206.962	155.803	192.007	243.213	222.43	598.155	328.363	580.612	113.94	162.276	253.206	452.344	182.819	306.304	851.407	267.317	620.885	384.437	675.736	633.306	552.896	190.449	1009.32	691.768	1142.92	637.878	756.063	670.515	77.3712	76.4981	52.2256	51.5068	55.6909	58.6499	105.411	89.4992	80.3457	84.2138	277.646	59.2567	90.8395	69.055	64.7101	83.3389	80.3048	56.7551	70.6904	261.995
200618_at	347.857	132.246	95.2802	190.155	194.434	274.951	164.601	122.379	115.645	28.9702	191.892	298.264	384.368	249.559	429.957	167.723	54.6873	144.117	87.5446	136.858	175.141	153.295	94.381	416.631	290.646	398.517	231.607	259.058	184.753	91.7171	117.936	145.887	59.4129	150.121	78.5175	62.8447	149.99	36.2291	100.25	120.507	37.6125	150.54	30.0454	83.4131	75.5544	46.675	57.1528	74.6328	195.245
200619_at	57.9672	46.8289	33.0782	27.9746	34.5991	124.91	78.0476	21.0844	28.7591	26.9393	19.3064	40.1625	111.524	24.6013	49.1195	101.747	24.5428	86.5008	43.509	37.0617	83.5732	56.2502	32.1949	105.7	111.401	145.612	64.6787	84.1584	85.2927	34.374	20.1887	53.3997	16.9648	18.7253	64.8086	26.9417	20.419	7.80237	23.6737	28.0405	17.0147	213.766	21.4812	16.7304	16.6906	11.4144	15.5264	19.2903	79.1478
200620_at	303.299	337.491	240.83	276.002	462.65	467.936	287.015	389.586	407.177	445.122	263.256	367.982	442.586	287.51	547.366	326.395	145.784	531.511	460.799	341.015	441.146	461.108	162.439	685.803	646.43	523.226	826.964	867.505	902.44	1681.55	1238.5	1424.94	1266	1941.6	778.481	2433.37	1460.43	2684.12	1503.02	2217.48	665.272	696.951	1356.4	1842.72	1328.73	2553.99	885.353	452.952	510.294
200621_at	34.0108	44.918	36.329	43.4135	43.8365	49.4561	37.6287	33.6041	26.7392	23.2549	14.9891	27.7624	29.984	31.5777	41.8584	87.158	25.1187	50.9348	31.7269	64.1963	91.2261	99.1342	43.0803	111.964	63.2146	130.905	167.333	90.3245	120.505	36.6156	33.5081	38.0727	21.7557	28.4909	28.7365	36.3401	34.3593	30.7505	26.2035	31.7942	21.9614	34.7489	26.1423	28.9156	22.7808	21.1773	25.012	21.1563	46.945
200622_x_at	36.9715	49.4768	121.589	125.515	101.362	150.139	156.012	116.91	100.82	102.189	94.8224	96.4629	150.618	53.0181	114.348	182.549	126.834	84.605	68.8036	174.605	314.212	337.102	113.592	374.814	419.386	510.017	479.154	354.376	203.109	613.363	593.389	917.944	348.572	1199.55	399.966	245.006	846.822	221.975	302.877	351.208	193.802	1388.25	752.722	342.404	560.11	372.366	124.894	335.985	113.817
200623_s_at	1338.7	1395.59	2170.56	1595.18	1829.74	1793.79	5341.49	2992.19	4509.4	2346.21	2077.16	2054.64	2357.23	1407.87	2585.29	5220.15	3581.13	3545.03	3410.67	4078.05	2853.02	3573.34	591.58	5085.07	7427.13	5609.33	3685.58	2975.71	4194.15	2485.58	1268.56	3442.37	1510.99	1618.02	2767.7	3697.51	1338.59	2509.71	1420.98	4077.49	2391.13	2897.58	4856.03	2341.97	1673.83	5296.79	2016.64	2738.63	2203.11
200624_s_at	1389.48	1324.2	1893.42	1266.33	1241.81	1549.25	2527.57	2030.16	2687.02	2835.22	1415.09	1356.25	1617.78	1139.16	1297.41	3020.18	3059.67	2310.99	1870.93	1404.88	1643.59	2096.22	1548.08	2318.9	2966.65	1874.05	1818.59	1768.7	1430.21	535.874	237.772	569.724	260.175	174.462	669.77	555.816	353.82	498.121	308.177	1260.85	604.317	510.862	180.982	322.924	427.601	857.812	739.468	547.35	1367.16
200625_s_at	1148.86	1330.86	1649	1489.24	1517.22	1156	1367.52	2668.39	1991.68	1430.81	1385.11	1698.77	2589.09	1210.7	1918.09	1657.15	1405.07	1583.01	1080.09	1096.6	779.916	985.173	273.133	4636.95	3864.78	2745.07	1556.82	1320.81	1511.37	151.202	77.532	589.628	112.851	60.4081	162.071	166.293	182.153	63.0535	145.581	349.133	198.168	172.892	86.6126	58.3066	250.937	648.585	699.298	333.6	2154.22
200626_s_at	1385.41	1343.65	1269.2	1267.66	1392.85	1631.5	2714.06	2246.51	3119.71	2170.07	1279.34	1286.38	2042.48	699.298	1498.54	3321.82	2945.2	2255.71	2367.33	1922.75	1962.23	2005.26	1230.51	2699.62	2918.11	2096.39	1896.48	2047.05	1611.28	555.859	193.645	689.031	498.552	331.496	676.65	788.976	386.382	609.773	430.213	1952.39	763.828	662.742	1630.01	352.613	528.93	1196.36	824.272	606.241	2103.4
200627_at	952.272	1045.11	788.757	807.045	949.237	789.695	1051.57	1070.95	1836.12	751.635	661.288	768.237	790.062	648.485	1028.09	1935.55	1530.07	1607.79	1080.32	1259.54	1587.33	1677.25	517.621	1854.18	2033.94	1243.86	2317.03	2127.84	3022.4	1976.31	1199.33	1456.51	1571.88	1890.51	1320.12	2856.23	1400.44	2743.37	2128.7	2204.71	1182.96	1105.19	1814.9	1575.05	1886.96	888.309	1390.83	912.022	1155.49
200628_s_at	37.0718	38.8772	22.5729	31.6087	35.6383	40.0735	28.333	38.6584	13.1549	23.2811	16.5393	23.3638	25.3934	22.9965	30.8514	32.6776	22.132	22.889	19.5744	22.662	23.5591	40.776	32.1995	25.8558	35.6644	38.262	27.8982	28.7423	34.5916	24.1789	22.115	27.2715	24.9228	21.6882	22.9361	23.8753	21.9397	23.9165	24.1626	23.0264	24.0316	33.228	24.6645	23.9365	21.7201	24.0702	23.0332	24.0255	31.884
200629_at	48.4923	41.6783	22.3028	38.6982	45.5995	73.2533	52.8578	49.6426	18.1451	55.6013	12.423	30.2005	43.261	20.8237	74.3324	35.2138	17.1771	25.5601	25.3306	11.3147	43.962	44.3917	31.1666	58.4552	70.6697	134.817	54.3335	52.1605	63.7702	18.8966	15.299	25.3595	12.5799	18.5525	16.7666	21.3449	15.9599	12.7234	20.848	14.1894	12.9573	37.9289	19.1565	18.8144	15.5037	13.258	19.6838	79.0476	103.685
200630_x_at	1045.62	1123.54	922.351	893.438	991.066	877.554	1848.01	2126.3	2319.73	1228.11	765.981	935.616	1245.01	791.792	1014.82	2661.72	3202.8	2285.21	2062.64	1162.08	1698.34	1644.45	1674.75	2137.53	2491.54	1495.09	1808.76	1822.71	1528.91	429.595	91.4711	446.388	186.966	173.122	477.236	590.283	125.116	65.3947	356.724	852.295	326.987	500.729	1993.52	87.4982	353.205	229.516	827.257	422.876	1904.1
200631_s_at	921.337	933.151	957.301	830.624	919.173	1260.45	2344.93	1659.75	2708.54	750.392	896.785	902.303	1417.71	527.717	987.948	3983.86	3313.97	2404.47	1543.86	1569.15	1337.93	1652.64	1602.81	2243.39	3393.42	1810.17	1376	1484.42	1179.08	289.06	54.2804	409.34	106.495	27.9311	294.04	101.679	49.6346	28.3898	137.978	657.506	178.795	435.913	164.67	28.6571	166.565	136.035	359.248	170.15	1021.41
200632_s_at	330.197	242.665	79.6896	93.5921	158.102	202.298	266.005	103.558	120.481	175.498	42.4422	163.619	445.126	110.688	342.731	57.0357	17.5517	219.055	53.2355	112.705	97.5006	50.6545	32.8259	280.941	111.616	228.986	115.178	348.606	95.1861	63.3753	17.6083	38.5087	17.8454	48.4405	27.1908	25.7316	51.6169	18.7015	110.065	24.9356	16.8108	14.4438	16.9429	14.4614	62.4529	10.3698	43.7873	38.5917	424.972
200633_at	2045.02	1778.71	2679.6	1583.88	1679.85	2195.37	4228.58	3349.98	3949.54	1212.35	1698.64	1767.95	1891.97	1654.7	1837.16	4637.22	4577.34	2319.7	1531.83	2614.38	4606.68	5380.54	871.438	4370.28	6795.98	3890.27	2868.93	3564	4456.54	10841.8	9733.68	10749.9	8121.01	11819.7	6649.76	9346.28	8700.12	10809.3	7682.68	9603.06	5844.47	7742.68	8066.34	8766.27	8283.32	9781.8	4631.76	5256.86	1430.16
200634_at	531.131	689.521	471.172	630.106	594.126	841.262	826.67	1151.94	688.824	402	775.464	872.472	1113.88	603.832	1110.94	1197.85	581.406	659.332	590.329	616.143	855.548	1125.26	858.521	2005.12	2266.39	1673.37	1317.05	1133.27	1021.74	194.035	59.2797	317.803	75.591	63.3743	184.572	128.75	140.692	49.8986	96.9668	193.76	120.162	692.373	730.343	105.226	166.524	74.98	351.268	280.026	1489.23
200635_s_at	80.5085	54.503	54.2019	80.3245	98.467	92.3707	66.5561	55.2772	90.0097	49.9039	48.5538	70.7652	83.9402	74.7532	82.3105	68.4831	46.7876	89.3191	61.8533	96.398	107.611	90.4579	48.8381	141.754	60.7659	71.1745	100.046	125.313	117.644	861.087	702.032	897.405	969.011	1437.11	847.096	693.662	1623.74	741.728	1299.87	447.452	451.661	421.393	896.305	1530.42	1387.5	445.223	756.481	621.968	125.22
200636_s_at	43.691	44.9943	63.336	47.7508	44.8815	42.4694	34.4716	44.8233	56.4372	29.2382	43.6335	39.6727	38.2488	34.5308	42.9855	49.865	41.8449	39.9616	31.1827	52.5083	47.1603	49.4535	47.3184	49.1998	40.95	41.286	44.5526	50.7105	66.2354	512.655	394.837	480.449	437.436	1008.52	391.319	219.612	868.214	305.918	506.966	175.33	239.733	317.699	123.514	592.926	538.389	85.907	197.852	369.043	39.2994
200637_s_at	30.2933	24.2514	26.3545	29.3371	24.9711	25.0788	19.9343	22.6955	34.8763	16.6577	19.9215	21.8342	22.7833	24.4577	20.4738	22.1983	21.7804	25.0987	21.0009	23.5707	25.3252	22.3224	21.3229	18.7791	24.4948	22.8376	23.8338	26.482	22.3316	23.4389	27.622	31.8548	25.1463	24.2216	26.2866	26.2429	25.8009	45.9479	30.5511	31.903	20.1986	25.5397	24.7564	25.2443	27.3096	26.6108	21.7573	24.1027	24.024
200638_s_at	551.563	446.893	894.381	773.337	656.533	1376.38	567.938	874.906	657.449	605.503	552.032	724.897	1180.39	515.746	821.64	1027	737.156	1342.88	602.184	341.347	565.419	794.286	140.484	2454.31	1555.83	825.73	1622.65	1095.75	1481.4	178.447	72.678	159.652	58.0566	68.1282	276.852	102.367	139.496	15.1137	155.757	151.839	77.3714	187.668	602.106	53.1046	339.324	32.1248	876.258	355.854	884.568
200639_s_at	1990.36	1407.51	2676.36	2006.23	2248.94	1759.66	2237.69	1965.91	2290.52	2004.57	1233.62	1566.97	2279.09	1153.5	1858.99	2753.05	2974.6	2152.31	1930.49	1628.6	1665.47	1915.01	1818.49	3071.94	3460.52	2240.02	2257.3	2201.26	1994.06	370.361	166.747	429.199	388.376	199.054	459.432	522.641	264.561	287.502	426.186	1419.86	441.64	382.814	1226.79	188.365	590.328	600.759	1488.31	634.046	2096.72
200640_at	2451.4	2148.47	4032.08	2838.01	2999.78	2601.65	3155.44	2405.06	3149.08	2435.27	1909.12	2273.48	3134.58	1739.61	2566.27	3908.65	3696.56	2978	2020.42	2009.67	2374.69	2734.08	2364.8	4407.3	5242.52	3151.23	3005.1	2965.36	2222.62	530.268	226.212	463.823	423.362	208.465	487.052	413.678	303.881	326.263	544.542	1621.34	581.977	526.992	1316.41	178.4	655.875	708.887	1725.32	715.562	2829.67
200641_s_at	305.688	271.631	416.767	370.534	364.193	443.13	204.268	126.543	146.903	202.764	332.788	319.664	295.241	304.404	349.123	236.849	188.588	341.52	211.31	219.757	271.494	364.251	211.921	636.255	348.704	402.195	721.872	338.562	320.135	43.1466	69.1444	25.4268	57.2339	31.545	45.0747	87.3148	73.8211	204.601	101.853	130.232	100.442	116.213	93.8603	312.522	70.5164	247.304	145.693	121.349	265.629
200642_at	422.474	188.772	181.629	212.831	237.917	405.386	636.603	564.485	709.947	640.789	139.974	182.052	231.637	159.712	212.122	896.715	568.067	651.767	574.704	1004.62	822.302	1166.23	1703.12	700.06	1176.46	620.865	1094.36	850.872	1599.29	1318.44	1167.16	1360.87	1784.02	1616.18	724.053	2007.11	978.973	3043.02	1605.81	2113.86	929.585	1042.68	1738.2	1596.26	1343.92	2030.23	625.705	487.319	500.997
200643_at	52.7272	49.4329	52.7109	75.0149	46.7896	60.5431	46.13	47.5009	21.1037	29.7597	42.03	45.8056	44.4007	44.0521	53.5497	55.4403	36.8018	37.8226	32.1025	59.4547	64.3834	74.0141	81.0065	49.2167	63.8318	54.4925	45.9711	65.997	56.8052	63.5344	63.8974	65.433	57.0371	60.3071	53.3877	56.1627	73.6828	69.3361	56.6078	64.4964	59.1108	51.2301	52.2551	72.8826	52.1773	50.0286	43.984	39.8309	37.8259
200644_at	124.727	103.897	56.4171	89.1396	120.624	134.248	98.6429	88.8512	74.6094	44.9183	24.0964	50.7456	81.9902	43.9548	76.3614	164.87	46.8561	193.17	105.126	95.0813	176.432	166.929	122.794	120.049	71.5681	100.767	102.105	132.47	154.447	19.4519	25.5214	20.4517	27.0312	22.5026	18.1088	17.9055	15.2255	15.9022	85.7034	42.4915	18.0068	28.3864	40.6224	20.9788	18.0808	21.3807	30.0723	17.2463	111.179
200645_at	1668.22	1525.04	1274.21	1031.59	1826.03	857.975	1629.97	1931.82	2397.1	1173.89	1129.78	1522.69	1971.69	1013.3	2381.68	1139.66	660.092	875.808	1005.64	2504.37	1353.88	1429.07	967.037	2028.52	2287.96	2417.4	1652.04	2252.81	1699.11	5045.44	4633.31	4472.03	4209.15	6726.94	1886.89	7667.46	4759.6	8729.09	4071.06	9351.77	2806.37	1814.35	5195.54	6107.2	4357.64	9286.68	1707.12	1979.4	2378.37
200646_s_at	70.538	36.6186	43.0721	47.3454	42.1831	47.2832	33.1018	33.0716	37.2354	29.9469	26.8368	29.589	31.2683	28.3025	32.2744	38.9352	27.0704	39.9117	29.8355	44.1219	42.8392	46.7376	27.5884	36.9021	41.3467	45.0041	45.954	41.2217	32.618	60.5103	53.7872	53.5539	63.6164	75.9731	42.5704	38.6737	75.5	37.0141	62.5272	59.8127	30.4457	47.1422	48.3446	48.2504	51.3539	48.7667	44.5083	36.7035	30.5417
200647_x_at	111.585	75.5894	76.7108	76.7819	96.3725	99.2501	201.455	117.061	74.2328	36.3589	43.9654	72.8434	106.7	50.3577	119.184	210.164	61.3659	181.045	53.2667	118.982	212.313	173.862	137.578	131.415	189.65	251.142	168.562	124.444	110.965	65.1193	36.2368	121.096	39.796	35.3781	72.1195	43.7	39.6212	41.7166	42.2322	69.6037	38.702	244.999	34.9784	39.8561	34.9924	36.1768	30.3446	33.4682	59.4147
200648_s_at	268.913	200.739	248.772	196.894	173.778	157.936	139.585	240.313	217.188	279.415	268.334	154.744	83.8833	106.877	238.352	152.758	174.456	98.7206	85.7768	575.924	433.148	487.491	155.962	293.338	242.718	175.823	208.253	236.167	246.81	2666.07	1926.44	1603.96	2328.97	5213.53	314.507	3363.23	2639.74	2706.77	3274.27	3527	750.8	469.834	3125.86	3311.09	3146.14	3049.98	220.089	232.988	74.2965
200649_at	35.9462	43.2148	31.6454	40.2919	40.3308	45.703	22.5605	20.2131	20.6643	25.7352	19.8305	25.758	24.0809	22.7932	40.4423	39.1344	31.2645	42.0553	28.6714	55.6301	52.0122	41.8989	42.4948	46.6638	36.1212	75.0118	70.1348	76.7265	64.9558	139.576	101.508	196.819	83.8672	405.948	60.8513	91.1281	278.647	64.1395	218.033	97.9181	28.1548	125.728	58.2448	90.5338	163.469	40.7215	42.1706	68.8208	20.8069
200650_s_at	2169.87	2096.77	1809.92	1342.43	1829.43	1019.91	3735.35	3207.19	3229.81	2106.95	916.859	1345.38	1901.58	1111.33	1690.9	5190.66	4502.97	3166.93	2764.02	2257.72	2957.3	2863.84	2844.85	4644.98	4595.71	3114.47	2558.99	3169.87	1672.43	623.737	42.5017	242.576	156.442	72.0849	285.233	963.814	138.552	40.0752	332.014	1997.87	335.686	237.303	636.943	45.1772	322.769	481.319	681.278	277.221	2528.61
200651_at	1510.54	1271.11	2014.39	1031.64	848.103	1409.03	3350.19	2800.95	3023	1869.61	1223.17	1100.87	1587.93	668.391	1131.35	4539.29	4140.01	2862.34	1683.67	2360.82	2556.09	2871.04	1817.74	2492.53	4608.07	2759.26	1630.93	1738.03	1711.8	317.783	255.481	602.217	190.103	184.8	338.871	132.562	116.182	263.749	291.432	1141.19	257.129	906.291	190.885	154.005	298.478	169.046	421.775	348.946	1755.48
200652_at	168.991	207.308	102.623	107.382	121.919	268.078	575.997	319.889	358.079	229.97	73.416	149.31	296.846	87.8355	259.632	418.679	206.463	419.799	360.742	289.324	406.113	391.115	43.8407	371.203	415.019	565.418	271.209	362.433	262.586	65.2887	42.5235	56.8219	26.6448	29.7121	65.049	39.7136	40.2351	28.7133	29.5321	62.3048	29.9608	172.771	22.281	28.6733	27.0749	13.4952	21.2337	45.7204	358.412
200653_s_at	1168.61	797.567	2435.79	1224.61	1340.19	1589.84	698.229	686.609	884.434	1884.1	2116.55	1276.15	1396.55	732.958	1224.16	664.343	475.267	598.028	870.449	1111.98	588.811	873.08	1585.62	1967.66	2472.82	1475.98	1839.68	1991.83	1242.38	665.063	525.21	503.848	481.901	589.974	296.521	742.168	610.266	806.361	556.095	968.204	502.592	316.682	652.332	790.333	571.356	1243.83	753.084	354.691	1591.99
200654_at	286.568	196.124	126.781	128.67	257.948	286.57	1111.89	506.272	873.244	266.251	177.521	325.074	536.023	221.747	529.225	531.453	178.756	835.777	663.268	432.081	451.152	424.892	2672.38	1467.78	875.743	908.247	628.795	1211.97	894.27	339.666	37.2673	416.233	56.0772	165.16	222.093	163.876	158.696	25.2077	257.06	200.621	137.634	315.104	478.178	53.775	166.222	254.722	264.105	189.466	1026.42
200655_s_at	1109.72	911.058	966.774	1243.19	1246.66	1440.76	691.337	764.93	1102.42	1415.67	1754.97	1235.6	1231.84	776.146	1389.13	552.179	325.841	687.661	540.177	493.249	554.941	711.364	399.604	2495.63	1852.71	1141.99	1430.8	1609.83	1230.74	312.993	97.1518	715.095	77.2404	122.511	292.081	146.884	412.596	141.946	281.872	172.691	220.265	275.73	199.271	301.162	309.036	275.744	486.278	374.877	1522.73
200656_s_at	54.2334	90.8812	97.3576	43.5921	44.37	64.0406	55.5186	77.8502	38.3672	51.8186	39.9187	45.7043	78.9819	35.8929	38.5581	65.597	37.6207	58.4937	27.4836	71.367	69.6379	54.6301	60.1369	167.082	112.786	64.6501	190.479	454.831	104.192	37.5478	37.2891	30.7955	30.6461	23.2378	40.8424	37.3344	28.101	74.6592	31.87	41.0239	43.3661	38.7917	23.832	44.1334	36.3059	19.9758	20.5096	34.487	68.0451
200657_at	1133.3	901.761	807.611	643.882	550.574	820.541	1513.29	1415.53	1902.5	434.553	884.699	814.989	1035.05	583.473	825.709	2063.13	1168.33	1714.38	861.96	1195.92	843.335	1287.96	551.956	1404.35	1844.28	1326.24	1178.38	1016.05	1258.85	276.147	69.2092	453.506	182.747	82.7743	267.76	154.204	117.119	31.693	117.185	400.769	223.986	686.81	638.444	98.3136	117.021	57.9845	169.763	288.789	1352.03
200658_s_at	78.9479	51.2797	50.5445	52.3082	49.7313	87.3562	73.6408	58.9648	63.1727	65.0954	41.1591	62.2892	92.4621	64.3288	61.4917	103.199	50.4796	97.6499	75.8641	95.516	181.998	154.122	56.7957	132.63	117.355	177.677	140.621	191.897	122.926	75.1381	67.7793	89.2489	36.5968	77.235	42.8938	55.963	58.4704	55.5703	62.2421	72.0896	32.3699	145.5	71.5692	47.9045	54.7151	26.0387	41.111	48.1806	73.9064
200659_s_at	37.1537	35.4959	27.7881	32.101	34.9049	40.0093	61.0034	20.5325	17.9954	20.1395	18.9395	26.9723	36.6378	23.8591	31.9682	50.3323	29.4396	67.0038	39.5586	48.8104	71.2462	58.4307	33.4952	50.2136	39.9191	55.8342	72.722	85.8505	77.8494	35.8597	33.9766	47.2106	31.9511	41.5347	30.7811	47.5136	46.5067	28.0674	47.9882	24.1248	21.2595	38.4713	48.5921	31.56	43.6611	26.9148	49.6145	31.9311	32.6435
200660_at	161.627	122.128	169.583	86.1768	100.975	119.511	214.608	262.721	82.6045	84.0342	99.1901	165.387	174.436	163.142	265.052	88.2812	63.0695	35.4363	58.8029	57.8449	136.033	67.9902	92.4463	239.065	249.382	968.534	52.5691	222.222	61.0012	38.2737	50.5892	22.7016	33.8534	17.9604	31.7133	47.1091	30.7424	69.0641	39.481	115.934	45.5586	57.8448	38.8281	54.9536	29.4158	48.3755	45.5362	73.6526	119.427
200661_at	36.7505	40.3634	75.4609	85.889	95.3612	75.213	133.412	96.8494	45.0855	48.523	47.0386	101.604	183.448	85.5623	144.341	122.856	81.6486	78.1895	70.3004	76.052	146.979	91.4834	152.056	166.308	199.441	353.433	188.146	179.575	141.745	55.1709	91.817	69.8271	74.9905	61.3055	69.2097	62.8947	60.8383	80.7791	60.3914	69.1501	68.9222	76.1996	58.5355	115.381	69.5009	58.1176	95.0717	68.514	162.193
200662_s_at	846.361	1029.61	826.55	596.147	566.295	1362.96	2780.58	1342.04	3071.8	1032.91	984.049	1001.79	1304.93	702.215	1116.95	3844.24	3792.01	3254.69	1940.71	3011.93	2965.9	3540.54	2028.96	3213.37	4541.14	2716.12	3451.36	3341.87	3178.17	846.516	200.922	592.862	240.573	372.332	582.173	287.005	442.996	398.075	482.501	1870.72	436.845	764.149	803.874	288.973	527.639	94.9472	517.466	466.595	1359.65
200663_at	528.505	285.163	161.864	270.979	615.287	206.428	1281.97	1297.11	1414.82	115.3	232.891	388.663	630.158	244.391	636.215	1009.94	702.749	621.353	456.579	713.328	694.836	943.76	848.628	2252.14	1373.33	1064.77	1110.43	1173.94	710.603	41.9101	61.546	56.275	44.1975	32.9838	53.3629	59.9237	57.9929	28.7579	96.4349	239.231	57.3465	63.86	99.3585	66.6403	112.782	74.2737	176.321	57.9575	517.852
200664_s_at	49.6005	41.7994	36.7475	44.5576	52.0705	54.6668	25.4099	18.0397	10.1918	115.352	20.9204	25.0836	23.7309	25.7281	30.9931	23.088	15.1361	28.3264	25.2065	30.6152	49.3483	26.7467	25.3957	33.7482	35.1488	32.4479	31.4809	37.3384	37.4439	97.7495	31.6568	90.1703	29.6253	45.6597	64.4007	83.6457	44.0711	18.2876	72.8079	46.7127	46.7218	131.339	300.399	73.8312	39.3912	62.9588	69.944	66.5923	28.0496
200665_s_at	56.0407	68.9512	104.9	397.511	266.905	129.112	515.54	219.083	376.24	81.638	75.5187	327.091	415.877	308.451	1181.59	2698.06	427.838	6365.37	7296.55	2787.37	2085.9	1291.64	2323.24	6708.37	4105.52	6462.22	9672.84	3100.59	1652.88	575.893	367.609	930.279	686.749	932.849	602	1742.06	1677.39	176.237	4760.63	1913.52	1783.3	482.316	22265	376.536	4038.95	855.33	9144.45	1713.01	2487.62
200666_s_at	217.109	258.027	182.454	210.896	321.525	319.149	242.869	225.029	258.326	522.867	186.918	208.238	157.438	238.646	267.748	190.478	92.6522	222.104	279.894	259.036	172.044	212.082	222.155	304.626	238.212	266.946	282.122	260.935	381.83	204.956	77.1212	357.687	174.67	126.936	323.009	748.187	216.591	73.9098	244.919	316.524	191.666	267.669	3258.53	81.5003	196.978	272.388	384.106	260.855	360.75
200667_at	892.101	940.142	1187.06	768.986	1391.71	942.349	1647.9	1037.96	2207.78	1113.65	739.431	893.192	1202.17	542.741	1319.24	1831.18	1471.67	1132.54	1333.11	1939.2	1685.47	1914.3	170.805	1538.95	2415.1	1730.29	2013.62	1932.09	2528.94	2944.82	2441.93	2611.98	2657.06	3246.08	1250.07	4590.33	2721	5575.03	2979.4	4883.29	1864.44	1412.41	3958.25	3338.04	2339.54	4780.71	1111.07	1015.8	1166.79
200668_s_at	1576.1	1554.53	1848.69	1402.12	1727.98	1395.93	1705.88	1239.07	1859.93	1474.94	1151.77	1282.54	1564.34	927.289	1619.46	1676.16	1580.7	1250.54	1498.72	1698.76	1753.55	1894.67	1077.74	2080.66	2194.97	1660.29	2339.17	2271.09	2617.46	3118.35	2789.94	2625.64	2863.91	3713.47	1526.41	4163.22	2756.68	4433.36	3183.92	4503.34	1885.91	1663.96	4359.88	3357.75	3094	6103.59	1619.47	1803.18	1347.37
200669_s_at	378.643	481.447	459.906	535.966	531.643	772.662	359.293	329.473	341.764	627.544	526.598	511.967	484.001	418.837	643.572	360.373	281.086	486.749	400.226	329.217	430.275	588.311	311.861	777.651	615.851	432.269	935.066	930.651	1080.69	1617.77	1661.28	1414.98	1767.79	2490.24	805.566	3247.56	1585.77	3444.25	2160.53	3203.09	1044.82	914.022	2887.87	2209.48	1758.04	4400.23	1147.6	701.514	499.288
200670_at	82.1812	84.5499	81.5113	56.7552	106.933	84.0746	311.984	224.585	228.474	145.369	97.1741	156.187	212.544	164.627	175.017	191.627	77.8146	325.816	98.5808	187.083	258.307	195.674	142.025	212.544	211.769	311.2	223.402	409.048	148.298	39.7408	55.6502	38.3396	41.976	25.7408	29.3111	53.7303	40.4965	39.1421	31.4648	124.745	28.9638	47.1134	51.0989	31.8803	51.578	37.3924	58.3689	65.8358	303.484
200671_s_at	32.4562	27.0991	30.6327	30.2395	33.41	35.4167	29.127	30.055	27.7995	28.0555	27.6487	32.7741	40.3353	29.1496	35.492	22.9459	29.5282	35.9158	37.8435	38.8055	29.6996	31.0621	35.7272	31.8996	29.8395	32.3799	37.5522	40.7945	40.2173	41.9267	43.7498	39.6548	34.0479	45.7971	35.4019	37.4446	43.5987	30.108	40.238	27.9223	27.7685	31.2938	39.223	37.3165	43.5836	29.6714	38.5298	35.2149	28.6284
200672_x_at	123.485	89.0557	91.031	168.592	148.31	237.416	89.9275	35.9927	41.1815	53.4152	89.2041	99.3835	192.841	66.4041	85.404	48.5702	34.7538	93.5768	40.7885	84.8538	49.4349	58.0899	33.6478	73.682	51.5189	88.2639	52.7447	111.367	61.4199	37.7936	50.0588	42.7174	46.9005	29.2823	31.3132	40.6799	40.5917	39.2609	31.6462	37.7922	34.0539	36.2829	32.9249	40.9427	42.9781	37.1992	58.9754	32.9231	66.5939
200673_at	1450.35	1428.98	1217.46	943.659	1361.18	1136.32	2431.36	2452.9	2266.95	1219.87	905.328	1197.4	1624.28	1125.73	1241.81	1827.86	2234.1	1607.31	2028.09	1118.56	1235.92	1200.56	1246.63	1358.55	1688.27	1342.07	1015.41	1135.11	1342.27	283.599	204.575	414.752	223.822	280.735	360.654	581.562	267.28	194.245	275.193	974.554	395.67	323.995	1114.26	141.437	379.526	1463.74	504.507	476.935	1877.03
200674_s_at	5417.01	4589.85	6020.94	4245.31	4190.14	4337.67	8790.62	6538.75	5283.51	5958.34	3191.4	3660.39	5513.72	2644.53	3857.77	8732.61	8529.8	6282.65	4155.23	5020.48	6414.93	5986.78	2217.14	5620.05	8518.84	6537.58	4364.83	5210.48	3660.13	1478.75	1208.93	1644.14	2155.9	974.96	1805.96	2481.96	568.223	1872.7	1370.4	4781.54	1670.51	2982.21	2973.28	1110.42	1387.37	2570.3	2013.5	2110.62	5249.74
200675_at	88.3535	69.2417	43.1141	57.4131	85.6679	143.61	49.4361	33.7162	28.056	31.2725	34.5872	62.3516	140.613	35.105	88.5281	66.0193	27.0393	106.943	77.7727	42.4205	97.7891	67.5083	54.2053	68.4702	65.6723	119.807	67.1311	86.9878	83.2714	20.716	13.4838	16.511	10.2709	13.0864	17.0235	24.8651	20.4485	15.6668	22.1235	50.8672	17.4133	21.6524	50.5069	12.7391	37.2879	12.2265	35.5513	30.6083	120.045
200676_s_at	38.854	40.8393	28.1946	31.6861	42.2705	41.9595	36.7576	18.2469	22.979	11.5024	16.2887	30.1782	55.0842	20.8524	44.3305	58.6989	16.8279	49.4734	28.7418	60.1138	40.7747	60.5508	34.666	61.7506	53.773	98.3116	88.6384	62.0738	67.2463	21.3417	21.2406	31.0865	17.4165	21.9163	18.5624	21.1063	19.9867	16.7953	20.8558	40.0149	7.74964	41.6467	22.2389	26.3415	22.2844	10.4564	12.5809	20.555	154.306
200677_at	180.006	243.893	88.847	347.224	286.477	339.694	555.737	438.244	676.763	59.638	148.128	401.113	755.822	268.303	861.755	606.769	172.369	814.059	532.193	707.437	382.612	431.418	550.671	1170.98	761.996	1239.69	1052.5	585.83	820.521	226.14	62.526	511.636	87.3957	112.922	314.756	149.977	82.5813	83.3611	96.0911	235.124	161.208	244.129	276.863	179.268	120.558	38.6812	374.707	265.643	505.739
200678_x_at	39.6823	44.1196	25.1288	30.7796	34.567	34.2313	32.0703	28.5969	26.9742	17.2803	20.6283	36.0385	54.6094	34.1882	43.7987	30.4317	28.0432	26.4369	24.4257	33.4584	45.3625	30.4939	28.821	42.5046	45.5964	120.227	35.99	38.9963	37.4001	33.9236	24.4976	31.3966	23.2935	22.505	24.7697	27.4561	26.1765	29.7158	22.7133	34.5822	29.292	33.5063	26.0985	34.8328	24.8769	25.6071	27.9226	29.8484	32.0555
200679_x_at	1843.88	1892.76	2537.09	1717.18	1473.66	1689.16	4523.58	3730.56	4854.84	3264.37	3061.18	2258.85	2511.42	1952.23	1734.65	4650.13	4714.34	4583.7	2822.27	3091.9	2500.48	2718.78	1832.79	3762.49	5225.12	2959.94	2737.45	2910.98	2904.81	894.031	192.486	1027.22	559.111	275.839	1004.81	414.429	275.521	742.079	601.362	2119.68	1013.74	1147.7	1595.56	536.758	590.946	1847.06	1097.01	536.185	3245.78
200680_x_at	2150.73	1897.26	2098.63	1754.36	2014.02	1600.62	4518.95	3711.06	4047.17	2639.79	1519.54	1860.5	2427.12	1536.35	2114.57	4056.08	4276.71	2758.6	3355.88	2294.67	2793.98	2820.76	3134.66	2845.98	3667.72	2689.05	2393.26	2497.92	2483.25	1057.85	744.347	1065.16	1008.7	630.491	1197.76	1631.06	501.548	1128.47	1118.7	2605.58	1294.66	1401.29	3246.35	711.74	896.413	2922.64	1623.23	1069.21	2997.69
200681_at	390.401	407.685	193.931	232.306	376.269	496.785	298.097	387.647	480.365	103.351	211.538	302.45	530.944	193.018	385.992	721.006	385.035	844.523	369.244	437.278	407.203	563.006	91.4229	895.962	558.092	500.492	670.162	535.487	814.759	331.417	64.0368	406.545	117.421	121.567	236.241	143.252	197.799	83.5508	274.364	280.648	116.319	350.181	77.986	283.225	167.514	72.1406	104.329	193.678	550.969
200682_s_at	340.441	288.91	383.997	271.859	274.746	376.972	618.623	556.745	529.39	502.803	439.718	375.591	490.369	180.256	512.006	1241.32	1004.07	561.067	404.368	754.727	797.031	1098.48	1137.06	992.148	1300.26	1100.51	861.917	921.123	572.992	984.638	188.806	951.636	356.095	754.912	391.027	303.226	232.795	456.829	281.505	638.227	330.369	1356.21	191.801	691.758	533.832	141.742	313.144	303.315	423.73
200683_s_at	40.5959	59.3371	48.1855	44.8227	57.7307	56.8985	39.9415	76.009	34.883	17.8316	28.648	41.9034	50.0775	37.2583	57.6815	83.3632	28.5556	59.5299	36.9402	60.9662	57.8871	70.0205	52.0084	64.732	83.1156	135.594	133.984	97.9832	65.7326	30.3685	28.7838	33.7074	22.2651	27.1624	28.0201	31.8358	29.0127	28.3879	26.6936	40.8539	18.1932	59.4977	45.3234	25.3124	29.5452	19.7116	25.1165	23.2197	122.873
200684_s_at	374.767	174.268	138.738	170.801	302.438	310.238	190.037	51.7098	203.047	16.5246	160.118	265.395	501.464	153.829	401.655	534.703	149.713	548.034	365.583	428.123	280.599	429.454	91.8277	797.84	489.059	731.035	455.485	359.913	659.746	74.1292	39.1776	198.8	26.8725	99.8396	71.0499	61.1057	87.5554	30.1336	42.1082	159.909	51.341	110.638	45.4303	88.7255	145.301	16.4764	87.43	132.055	716.369
200685_at	387.782	412.767	499.573	380.353	382.8	617.742	855.943	463.758	1196.86	840.491	628.882	534.481	843.209	378.943	406.117	897.29	725.001	1028.85	1325.05	577.944	415.472	405.514	106.538	811.981	543.839	721.939	435.766	403.405	541.625	199.254	29.5622	171.138	24.9635	11.2083	213.98	55.8105	46.3062	22.3783	37.0892	159.746	128.386	204.114	60.7944	21.8642	73.1529	15.5397	190.351	282.442	687.381
200686_s_at	626.017	555.87	567.501	533.639	546.793	554.559	1462.01	1224.66	1821.13	1484	503.134	563.14	966.401	296.155	698.403	1346.25	1023.52	1039	986.317	799.636	534.452	610.716	60.6198	1004.48	968.28	773.8	791.077	792.034	1044.63	342.167	35.5852	407.038	81.5078	73.5112	317.563	100.355	90.0325	74.4843	142.294	488.652	261.169	237.218	1693.12	103.466	185.586	51.0506	416.288	174.566	441.599
200687_s_at	108.859	53.2563	39.8971	72.5816	74.8495	61.1815	128.831	123.209	56.1662	30.8054	23.0396	57.2627	146.315	45.6962	69.7982	111.485	31.1214	116.791	90.4076	87.8429	168.871	131.917	110.9	129.224	78.9173	150.866	207.984	182.691	133.576	171.506	82.7104	300.03	58.7017	137.133	84.579	76.3297	145.596	85.6546	97.1691	92.9951	84.4718	149.121	32.9881	94.8241	68.3028	22.0735	66.513	90.0938	193.739
200688_at	21.958	20.9341	20.245	21.7475	20.5568	21.8611	23.7439	19.0599	14.9858	32.7703	21.9204	21.5338	22.2841	21.8645	20.1327	26.3678	16.4707	25.2691	19.2331	23.337	26.4655	26.3983	17.6841	24.1251	21.904	26.559	31.118	27.7946	21.7233	59.8797	35.8168	214.737	28.1077	58.9479	28.9049	29.6333	56.6763	26.8042	32.2079	19.5059	18.4665	70.8681	19.283	28.9282	23.1467	23.0387	24.7255	30.3483	20.7285
200689_x_at	2950.08	2544.81	3224.2	2206.26	2136.18	2308.61	5670.98	4227.58	4525.19	3801.42	1754.94	1995.98	3162.18	1303.09	2194.85	5731.32	5065.44	4525.49	3123.63	3430.44	3530.18	3647.22	1012.74	4094.33	5985.06	4172.47	2854.09	2892.87	2249.82	828.067	381.549	859.669	639.816	454.272	624.414	803.209	432.397	570.518	542.949	2956.57	770.119	1007.39	1204.07	482.473	590.731	1472.17	1020.04	1159.98	3466.66
200690_at	271.621	88.8208	84.721	76.6213	79.4549	191.256	257.982	188.186	274.465	130.843	46.299	100.279	335.831	42.4551	153.183	559.098	122.999	609.441	255.244	318.887	516.825	483.239	428.953	474.547	571.864	524.624	483.236	474.187	620.705	120.929	33.301	66.4027	23.5255	48.4137	31.438	59.5142	70.2328	18.3487	52.8878	99.5823	35.799	204.417	28.7497	38.8458	203.736	14.197	49.849	89.9937	44.5355
200691_s_at	727.886	631.136	399.987	337.873	427.117	565.767	895.492	564.498	1294.4	437.959	366.34	442.504	685.578	283.921	537.687	1678.48	1193.53	1127.59	949.426	912.384	1076.24	1236.46	1138.41	1152.74	1811	947.503	1297.86	1442.22	1788.51	371.439	84.5111	450.518	140.048	153.409	212.176	149.868	102.189	124.125	263.262	582.043	139.906	465.254	153.728	264.343	353.658	58.8884	146.579	306.981	649.436
200692_s_at	154.708	183.497	74.674	126.975	141.544	186.521	188.425	87.8995	234.446	108.73	64.8318	106.291	165.639	80.1207	148.353	377.236	187.97	399.645	152.518	184.299	275.348	362.942	130.686	406.908	254.462	319.586	487.352	434.249	308.147	92.5049	62.9445	108.16	46.2642	33.6018	40.7225	61.8	47.8578	44.2081	67.8984	129.367	67.7314	203.263	113.595	42.2498	106.404	34.9444	47.4541	54.3024	152.888
200693_at	229.386	251.677	182.281	271.447	288.542	497.682	571.139	409.193	651.788	213.635	85.0486	177.47	410.655	124.733	227.707	807.352	352.74	697.098	683.464	478.43	367.803	383.868	160.6	871.301	614.43	682.636	453.243	484.625	516.126	331.059	59.7077	427.507	34.6945	75.9808	203.174	99.8784	106.585	35.8413	82.5206	252.429	157.609	355.519	97.3375	29.2135	73.3116	105.059	89.182	122.123	262.741
200694_s_at	106.889	130.889	43.759	118.478	76.4475	173.291	88.2988	74.5867	65.4384	157.096	46.3236	81.6501	151.364	65.7323	96.4325	212.39	47.4967	182.414	134.009	60.1486	161.28	172.058	60.8486	184.726	158.591	225.53	179.055	164.971	131.652	61.063	46.616	113.433	20.9318	38.2241	126.887	46.8997	46.3135	29.8581	48.7017	59.4445	41.5146	283.342	49.3968	31.6513	44.6038	22.5115	53.5049	76.8838	90.2769
200695_at	31.4005	31.2661	26.785	26.8716	30.1431	34.0915	38.2711	26.393	24.8214	23.3094	25.4498	30.4568	34.0819	28.2097	35.1668	37.3616	25.6418	43.3501	34.1028	31.7857	33.0158	48.6497	24.9508	42.1244	35.7643	41.3151	48.4933	44.1139	47.9297	43.7379	41.4269	41.0898	31.4666	37.0723	39.8983	33.0048	33.4762	38.1633	27.6061	23.9695	23.7379	33.7172	32.4405	29.4469	38.5335	29.8563	39.1348	34.3913	32.6374
200696_s_at	34.0527	43.4441	45.6456	53.5999	54.8281	56.5236	40.8892	37.6307	14.7483	31.4149	34.0209	49.2881	61.822	41.2229	68.0675	34.6502	34.9197	46.0639	51.9057	32.7598	34.6114	32.0919	44.7618	147.935	25.5827	88.0289	84.4778	95.09	67.9158	55.038	44.057	49.7289	32.2203	44.1219	42.6642	38.9868	40.2098	35.4778	40.3538	33.0589	48.7172	38.1943	52.4495	38.9847	45.904	33.6785	48.5751	47.2825	60.0472
200697_at	46.1729	25.5665	45.991	41.4208	47.28	70.9248	62.844	26.3215	26.3592	20.5514	21.227	38.0272	50.9002	22.5968	85.6487	60.6096	27.6031	37.7226	25.9083	86.1951	91.7874	167.215	32.3756	189.069	86.818	131.101	165.681	100.043	142.993	548.703	904.215	821.221	655.548	1170.39	343.984	790.764	1050.82	393.639	923.843	564.896	201.88	681.412	568.648	797.582	689.68	528.693	215.133	319.952	43.6325
200698_at	678.397	586.572	375.932	474.807	514.528	596.812	1001.51	1014.32	979.547	362.421	440.019	542.546	493.654	569.603	700.293	772.335	847.787	663.459	1281.96	826.233	790.991	1024.11	386.713	957.894	833.901	569.011	1283.75	1090.23	1286.05	674.912	285.063	520.949	367.895	459.253	449.648	1342.16	381.963	656.061	777.396	562.506	374.071	404.806	1722.71	625.998	511.345	648.721	383.951	337.744	664.432
200699_at	258.506	151.056	73.4308	83.8302	174.897	129	388.751	181.285	152.76	20.9483	34.5739	151.238	374.819	102.262	394.779	646.917	216.725	572.906	449.386	412.829	408.113	381.019	68.9349	836.267	480.023	664.071	842.814	559.889	631.794	590.143	55.7975	406.192	57.8011	151.234	247.123	156.461	350.081	38.3599	175.213	197.712	108.225	314.811	117.128	189.069	455.801	66.8608	118.843	205.816	276.46
200700_s_at	130.359	148.727	92.1359	118.673	169.482	173.004	254.134	190.658	98.1563	64.1037	87.5542	162.573	214.48	159.139	233.753	136.958	78.1065	171.243	128.058	83.4951	310.571	344.752	245.224	351.618	258.002	207.254	364.232	901.689	570.549	527.347	225.224	516.551	215.702	252.888	452.232	425.868	187.653	232.629	441.425	100.59	120.109	431.102	377.785	280.79	439.924	257.307	222.221	246.045	429.826
200701_at	925.638	1378.8	581.161	728.462	723.851	908.504	988.094	665.785	619.096	591.842	1057.21	1508.85	1482.19	2168.71	1525.15	488.866	300.697	1011.23	834.599	609.936	537.62	504.13	1275.6	1318.94	682.959	1429.32	741.065	807.557	518.411	180.655	88.0256	238.853	46.3328	59.2267	134.162	88.6785	79.5616	19.6414	105.408	128.93	82.4005	299.757	80.673	52.8465	110.956	32.748	144.737	591.058	1830.99
200702_s_at	200.191	160.249	94.2789	144.679	149.248	249.872	115.74	97.9584	89.1835	473.943	115.798	183.197	236.142	189.417	217.462	145.038	75.98	175.998	163.359	199.166	179.775	128.935	167.093	274.566	188.849	276.024	289.563	230.735	172.943	41.6482	46.9115	94.4375	43.0163	45.5976	134.108	58.4412	79.8377	88.5696	74.6363	94.9795	92.3525	152.011	48.4718	148.745	86.3802	49.5838	76.7575	121.467	307.6
200703_at	636.583	726.497	499.898	674.344	813.58	539.2	988.537	1150.92	1251.41	264.413	708.913	766.083	914.033	604.505	879.322	1416.88	1153.42	787.989	1122.67	1704.25	1539.02	1680.79	873.984	1030.21	1660.16	1081.93	1599.63	1365.67	1594.16	2703.83	2039.75	1569.99	2349.32	3167.52	768.017	4331.3	1759.51	4488.49	2484.03	4736.94	983.321	1248.21	3096.46	2936.03	2121.06	3701.69	636.181	693.034	622.917
200704_at	1085.91	854.454	1037.37	810.093	918.442	1043.2	706.802	501.015	857.923	802.13	749.514	885.15	885.763	818.828	1129.21	52.5361	138.651	638.535	453.546	477.112	136.159	126.29	93.4697	1538.26	989.037	877.706	297.667	358.8	191.677	65.0027	60.8926	67.3659	53.5955	25.2844	31.2459	58.2384	47.752	31.329	68.8925	129.343	79.8365	37.458	307.336	62.3924	154.511	678.076	435.078	194.512	732.711
200705_s_at	4245.92	3434.51	4453.98	2985.61	3107.09	2947.61	7589.41	5500.23	5434.87	4795.46	2376.7	2817.96	4657.19	2039.94	2792.71	8244.82	7838.29	5970.13	4439.63	3205.16	4534.38	3933.48	1697.16	5819.33	7428.29	5344.52	3251.48	3908.85	2262.06	811.725	209.451	1043.14	591.798	288.714	875.304	926.945	227.466	353.49	613.966	3513.21	1134.16	1327.16	3068.27	171.787	444.391	951.906	1518.18	1496.78	4806.24
200706_s_at	362.45	301.067	242.784	344.456	410.729	392.076	76.2632	77.3871	131.541	193.792	265.338	318.95	310.808	268.144	467.985	17.2868	34.9911	187.673	105.135	135.108	49.3527	24.632	50.375	458.081	162.811	213.315	102.794	113.93	55.6305	24.6705	16.4948	21.301	14.9322	12.7047	23.4285	21.1009	25.3953	17.5176	41.8272	50.5082	46.7138	14.4896	77.1198	31.9394	118.599	32.2481	196.997	149.4	381.67
200707_at	91.3375	82.6463	71.6473	53.8775	54.9322	137.422	77.8775	55.668	58.5605	46.6202	44.8192	53.5799	72.574	41.4277	61.1607	121.415	35.9506	120.031	29.5011	51.2315	79.627	94.3704	43.0808	139.13	178.988	154.502	102.365	203.322	74.7424	17.0294	18.9931	27.7425	22.7928	11.0311	32.8467	19.0888	26.7235	39.7209	19.0355	32.3204	16.9745	48.465	18.472	36.8463	18.2265	19.1316	25.506	43.183	17.8117
200708_at	106.723	90.4366	33.6236	97.0208	102.87	83.2367	209.653	76.0513	102.072	40.3361	42.374	92.4908	158.972	66.7546	162.74	425.709	76.2844	243.926	146.139	208.467	180.548	302.032	99.0332	368.656	317.85	324.519	357.328	274.604	415.228	137.706	77.2071	116.126	33.2056	54.306	118.81	85.4116	114.165	23.5683	124.098	133.104	39.1701	281.21	83.6113	35.4454	76.9931	33.9634	28.4618	85.0789	110.329
200709_at	2363.92	2465.52	3696.11	2274.98	2230.26	2069.43	3916.37	4209.85	3754.38	1886.07	1699.36	2226.96	2939.21	1693.27	2908.11	3640.92	3478.48	3209.73	3790.75	2766.81	3302.3	3589.07	2044.09	4494.81	4277.17	4079.87	3265.85	3635.44	3168.1	1607.28	1074.07	1108.78	1159.54	1567.66	846.215	2732.25	1222.57	1612.08	1309.32	2901.57	1310.77	1378.01	3546.92	1218.59	1316.47	3610.64	1972.35	1809.92	3333.95
200710_at	26.6475	27.0752	21.7168	24.9906	31.207	28.6982	32.9264	24.8641	17.3431	22.1809	16.7545	23.2029	28.4056	21.5206	28.2997	30.3956	17.6533	31.61	25.665	23.9701	45.4579	29.1589	20.8462	29.2964	29.6048	45.0717	30.2596	39.6929	27.4839	24.4669	23.0917	22.8073	19.7596	22.6423	21.8308	17.6018	22.0989	26.0648	15.9417	18.8527	16.9434	32.8346	17.5174	25.568	17.6881	17.8608	17.5808	17.8115	24.2749
200711_s_at	359.568	438.116	268.55	333.252	438.014	608.208	900.917	1006.49	1061.07	874.781	393.113	495.657	581.067	397.026	665.525	1003.05	809.889	822.014	1118.46	1135.48	1284.59	1395.25	648.261	1054.21	1056.46	810.426	1413.91	1185.9	2023.15	1983.82	1710.8	1355.38	1315.99	2283.85	890.98	3254.04	1750.63	2934.24	1850.48	2087.71	950.719	708.199	1368.66	2167.44	1904.47	3133.66	807.048	715.897	881.328
200712_s_at	73.3466	111.079	111.655	101.008	141.485	100.652	77.6665	45.4235	78.5949	94.8603	63.0371	86.1497	134.067	60.6591	107.448	99.3438	85.1843	86.4531	65.8671	100.605	137.75	129.415	155.7	347.016	155.551	249.659	381.867	216.826	211.143	90.0658	65.9309	163.42	70.7288	88.5843	85.6334	66.4164	117.655	109.554	73.3618	87.1781	110.006	191.999	51.2206	165.548	64.6723	50.2499	58.6099	260.476	65.9641
200713_s_at	1063.25	1068.56	1067.53	914.08	1159.69	1190.87	2763.85	1762.25	2492.43	1254.41	1086.62	1355	1868.48	1200.49	1383.03	2750.14	2776.35	2112.64	1484.36	1336.36	1465.58	1835.35	358.659	2953.66	3086.65	2062.06	1868.59	1872.55	1928.06	393.129	119.835	849.308	188.605	205.49	472.894	421.614	168.354	113.918	217.665	810.679	355.069	532.588	876.371	328.654	342.815	770.68	661.478	282.054	1727.05
200714_x_at	203.47	309.826	102.624	175.026	248.263	243.38	207.302	159.178	152.789	107.899	177.331	266.795	344.468	182	455.726	239.216	102.916	309.817	376.385	232.772	261.786	225.491	220.904	284.004	229.264	498.572	230.44	356.22	163.437	105.487	104.069	262.907	36.2959	105.746	176.09	75.2179	251.765	44.0922	168.253	103.024	59.4386	280.945	62.8262	130.19	97.0578	107.715	92.2944	120.555	261.425
200715_x_at	1390.09	1466.58	1765.01	1093.06	1067.01	1588.04	3465.39	1912.92	3042.84	2569.16	1052.95	1207.18	1938.38	711.642	1462.11	4784.64	4048.71	3806.47	2660.3	2284.02	2381.4	2711.98	1599.51	3099.97	4987.05	3077.65	1996.73	2024.74	1945.05	194.304	69.6139	414.351	142.844	73.9625	203.392	198.365	157.313	42.8506	208.095	1015.74	190.228	744.009	234.258	118.875	250.849	106.671	432.84	486.173	1941.73
200716_x_at	4587.69	4484.13	5244.34	3240.08	3460.73	3099.95	6456.4	5488.23	4518.35	5195.86	2420.32	3050.95	4632.44	2422.07	3190.56	6634.13	6441.93	5195.51	4171.11	3978.07	4779.63	4658.44	1562.15	4837.97	6539.6	5288.01	3571.91	3917.91	3044.78	1136.24	665.324	1297.99	1124.23	743.853	1189.1	1719.73	500.332	1243.11	934.985	4018.69	1312.07	1735.01	2781.29	854.062	1062.53	2158.99	1798.12	1954.87	4304.18
200717_x_at	4336.38	3733.88	4684.18	3062.77	3302.9	3091.11	6800.89	5722	5115.58	4635.16	2346.13	2929.59	4690.31	1956.56	3421.21	7032.15	6729.22	5020.2	4260.34	5332.94	5443.12	5464.95	1395.31	5083.66	6466.4	5245.58	4514.8	4977.07	3700.99	1763.04	999.905	1529.52	1744.15	1250.28	1254.39	2909.72	1080.6	2723.75	1795.65	5528.02	1771.42	2729.99	3902.38	1481.08	1595.85	2344.9	1671.24	2018.69	4139.13
200718_s_at	406.253	475.106	385.54	458.351	367.593	806.806	528.05	1404.42	1101.55	521.271	426.122	451.203	586.308	283.357	585.453	808.491	797.352	707.232	793.275	1133.73	1084.51	1366.22	828.636	1176.66	1363.45	808.752	1229.16	1078.71	1430.69	2255.76	2412.94	2084.58	2189.56	3279.82	997.712	3208.58	2388.88	4404.83	2355.65	4218.75	1215.15	1250.82	1564.58	3121.09	2331.33	3282.61	869.42	678.571	482.928
200719_at	210.902	300.801	172.331	368.789	327.699	691.19	456.053	358.092	369.925	707.686	258.213	349.506	510.024	209.537	540.739	541.533	214.773	491.615	319.131	695.975	785.948	904.487	100.438	573.073	518.033	596.605	1026.74	869.088	1178.77	2477.36	1978.56	1390.23	1508.97	2265.5	718.694	3974.64	1854.23	2419.43	2149.23	2591.88	779.694	655.289	3426.23	2101.37	1977.1	2701.57	718.716	549.741	573.595
200720_s_at	74.1682	95.7606	54.6101	82.7816	90.0093	88.9222	33.756	61.8577	25.3059	25.572	35.8904	48.4508	43.8723	40.7566	85.8694	60.3698	37.0763	37.2997	39.4067	60.2115	82.76	118.534	37.2414	58.1968	44.0408	78.0079	105.631	77.7928	50.712	427.158	191.49	548.078	144.304	907.717	122.957	172.862	333.415	183.645	260.91	162.895	53.4105	339.622	70.3744	359.771	448.325	91.1834	52.7222	74.3258	22.9856
200721_s_at	577.948	451.999	320.813	393.656	674.234	508.004	795.962	510.752	846.084	284.039	338.776	454.68	662.047	247.033	771.377	1001.81	451.572	1070.38	778.326	1460.29	866.561	1137.29	184.092	1344.68	1684.13	1444.84	1366.8	992.345	2383.76	3143.95	1931.34	2828.18	2170.48	2871.03	1378.5	3657.04	1806.78	5460.72	2446.6	2700.71	1388.06	1362.73	913.442	3811.08	2166.95	1983.79	1141.17	838.767	158.425
200722_s_at	74.338	108.976	90.433	89.088	111.044	120.275	78.0032	60.2532	57.5931	59.5318	63.9805	88.4866	90.2865	101.188	104.884	111.404	65.5997	144.343	101.79	100.983	119.385	67.5692	80.0165	134.821	86.5885	134.286	145.478	131.226	112.817	53.1896	78.823	62.695	70.609	40.519	46.8874	42.4782	50.3508	58.3177	50.5421	84.8817	42.1539	53.4195	38.5965	67.0065	45.2675	57.804	44.9386	91.3829	107.204
200723_s_at	116.326	113.676	64.9603	88.657	85.0417	165.729	190.342	126.319	140.344	32.17	43.9752	112.531	231.011	97.2402	162.329	303.161	85.1539	465.754	182.132	230.511	131.939	231.527	48.407	534.093	224.747	342.935	318.836	319.711	330.379	82.1436	29.1135	77.681	23.6041	25.9397	57.9743	37.155	35.1758	32.2168	47.0271	101.601	27.331	159.572	33.1375	24.4325	46.9769	15.7186	41.0565	86.049	222.687
200724_at	60.9474	46.3339	27.3025	44.2191	43.4071	108.791	78.7212	24.6324	26.6079	15.9633	10.9411	27.8314	45.7783	20.7887	57.6222	54.6967	25.7339	82.1075	43.0535	44.2982	27.3509	66.3397	28.9721	118.758	65.4454	179.148	115.286	110.713	83.1631	25.6149	22.0728	35.5381	20.6263	27.0483	29.6286	25.9514	25.0514	21.8571	22.3873	17.6939	16.4715	58.2536	29.8901	31.9723	21.8325	18.3827	24.3375	83.5695	27.4274
200725_x_at	3039.19	3049.41	3578.32	2491.81	2389.18	2821.05	5138.1	5021.28	5413.26	4483.66	2713.22	2499.17	3662.1	1653.5	2374.46	7698.36	7613.73	4680.9	4146.87	3227.05	3086.24	3300.91	3262.22	4917.33	8713.09	4871.41	2693.53	2716.95	1920.92	528.455	111.624	1213.19	414.466	148.482	470.681	283.467	163.692	156.948	266.443	2341.24	626.78	1110.43	535.774	226.819	445.085	1231.24	1011.06	723.408	4115.43
200726_at	1822.17	1386.48	2393.16	1348.77	1558.65	1557.57	2442.03	2048.46	2541.02	1293.66	1344.51	1309.94	1871.17	784.054	1492.73	2938.24	2401.29	1867.23	1894.92	2055.59	1941.58	2463.24	636.881	2350.76	2734.17	1884.61	2289.94	2181.13	2469.85	1028.8	370.069	932.018	551.103	746.585	1010.89	2002.25	613.404	1435.45	859.914	2451.1	1133.97	1116.76	2062.83	859.893	925.895	379.496	1042.79	851.275	2079.86
200727_s_at	983.326	833.488	731.556	836.584	927.939	814.33	922.288	1476.81	1241.24	994.62	1341.68	1171.35	991.486	972.006	1455.95	1121.12	681.136	1277.11	857.031	740.871	555.543	547.15	2163.31	2464.23	1910.05	1842.55	1376.75	1064.85	833.908	141.232	51.8087	157.587	75.0769	96.1129	218.249	113.6	72.3275	73.4641	70.5742	224.847	86.5815	250.772	59.9005	75.1982	99.7744	65.1341	408.776	162.919	2062.76
200728_at	1744.55	1748.43	1835.78	1493.97	1439.88	1802.29	1318.53	1671.37	1780.64	1095.27	1343.66	1499.61	2007.41	1126.58	1664.28	1922.36	1998.77	2355.35	1647.66	785.931	772.889	1034	1134.46	3571.5	2561.8	1629.64	1450.67	1693.75	1359.51	219.881	38.8301	319.905	35.1257	61.6041	266.91	75.3468	70.4831	20.6921	265.814	343.715	137.909	204.767	230.574	38.4007	312.381	265.64	547.427	377.689	2101.63
200729_s_at	985.016	775.23	691.994	780.264	761.927	964.705	442.357	818.471	759.693	550.046	707.739	758.367	1153.87	454.417	891.321	897.299	940.63	1452.08	721.96	401.843	539.712	687.225	138.45	2041.31	1428.31	905.837	1034.08	1119.29	1033.65	135.143	60.8342	261.496	35.6	42.0694	236.202	63.665	57.4561	27.6049	110.76	187.353	95.5388	210.211	98.6423	81.2813	261.127	29.0584	262.698	249.51	1003.18
200730_s_at	80.9511	75.5672	61.5934	113.878	55.4009	316.872	38.9616	33.0496	28.9401	56.4322	45.5089	74.8097	64.3544	80.5028	132.845	55.0146	22.7667	53.7593	20.7852	15.1745	86.9654	67.119	40.1567	98.6514	22.112	67.5496	136.419	94.857	38.2033	18.7254	16.5932	18.1994	16.3304	12.9707	12.6337	20.1433	39.0413	11.4506	18.6482	32.2159	11.7072	34.9432	44.5041	14.4862	15.4326	19.4118	14.824	27.603	335.739
200731_s_at	444	501.115	420.093	485.444	503.514	610.048	671.554	712.859	601.651	626.658	536.372	551.754	445.254	600.51	646.231	516.701	490.272	618.914	444.716	315.963	454.152	523.431	301.351	662.978	372.46	441.268	414.386	476.037	529.418	49.5901	53.7684	113.186	79.9439	20.5646	130.009	59.7856	50.5722	85.6605	35.1453	109.455	60.7824	214.2	161.177	63.3054	90.6272	133.563	118.653	154.894	732.01
200732_s_at	767.155	541.496	735.989	465.918	527.028	931.961	1260.06	952.138	1172.95	751.125	629.623	620.928	666.432	586.262	604.281	1075.65	852.933	885.662	826.274	728.688	701.906	734.194	1427.78	979.449	994.196	829.08	569.261	685.672	636.769	81.8901	26.7277	136.501	27.8722	22.5022	118.104	67.1161	46.2091	16.9637	34.1155	171.871	68.0053	198.144	153.567	18.9369	94.1906	14.9627	337.426	122.904	1188.24
200733_s_at	766.836	613.036	661.885	448.423	759.397	949.368	957.622	1181.07	1388.14	723.372	480.04	588.744	803.466	429.556	725.171	872.061	841.096	788.826	867.925	598.436	755.827	612.182	266.061	917.825	845.95	650.663	623.563	768.149	856.795	232.906	68.9694	156.74	86.4736	74.6372	125.817	342.393	213.447	49.8321	186.15	344.701	136.574	221.665	787.272	90.5999	132.588	290.243	399.158	251.556	864.007
200734_s_at	34.008	46.7731	36.2568	62.6426	59.9746	64.3999	31.9643	151.487	26.0186	14.6383	29.2004	43.62	61.9411	35.8922	55.7669	56.5478	46.7783	55.2003	47.8754	64.1596	100.955	101.741	50.0367	74.4429	115.587	187.466	87.4935	95.1237	51.2375	27.145	30.5212	23.9929	16.8686	24.1599	22.9151	22.7048	27.3565	41.9296	17.7343	28.071	28.4726	19.7853	29.2696	34.4624	22.5476	19.3719	35.8522	47.0198	31.3805
200735_x_at	4657.92	4611.84	5494.46	3717.45	3492.02	3587.12	6789.42	5171.12	4710.52	4637.19	2369.16	3193.43	4824.29	2390.98	3805.6	6081.38	5370.81	4788.71	3849.28	5586.4	5816.34	5869.79	1475.61	4935.25	6438.44	5086.14	5122.88	5527.03	4435.75	2648.63	1623	2166.38	2764.6	1892.04	1566.97	4305.07	1877.75	4214.86	2917.04	5804.95	2479.35	3306.8	3877.2	2552.6	2483.65	3285.64	2299.46	2513.86	4544.65
200736_s_at	139.747	151.643	137.078	276.322	347.517	332.535	323.07	232.714	169.7	30.25	83.1915	301.973	492.617	302.573	670.582	326.155	72.192	357.853	323.642	491.067	694.84	686.774	93.8484	811.838	521.698	859.043	1125.87	653.144	707.387	4723.6	6159.18	3688.14	4102.05	6598.58	1070.47	5420.88	4149.22	5959.62	3667.72	5731.43	1008.12	925.433	4231.15	4538.26	2721.22	5333.89	1261.26	620.733	892.126
200737_at	103.349	79.7918	59.8229	84.3144	87.7888	115.105	116.328	63.0656	51.3598	77.5116	25.8404	77.4942	178.534	54.9845	142.172	103.608	20.2659	127.153	56.8503	46.3435	119.319	127.73	247.068	252.05	120.586	247.943	230.743	233.955	197.311	28.8943	26.8568	52.1396	20.3336	23.4151	40.2949	29.6046	33.9314	13.8311	33.0194	40.3564	19.9095	96.7241	85.0506	66.3198	38.9462	15.2555	35.5068	45.7678	426.437
200738_s_at	668.087	404.993	324.425	451.309	391.128	495.138	869.63	840.66	913.76	538.438	392.031	455.506	538.991	363.265	560.853	631.659	452.299	525.063	442.129	343.973	414.579	574.31	1382.9	696.612	926.709	897.646	494.855	522.191	506.054	42.8436	28.5833	101.334	23.4927	20.2686	100.993	41.8868	50.5272	22.6759	38.029	132.057	35.4668	361.751	229.451	79.1741	53.5633	114.903	86.1267	115.998	876.402
200739_s_at	33.9055	38.5717	31.6974	41.9974	40.0635	36.654	34.5755	32.3435	42.9564	26.1585	31.324	38.2798	44.0058	38.2997	40.6721	46.1142	38.3209	51.8807	35.2074	31.3121	40.1167	42.8475	42.1419	43.5898	41.9533	48.1007	80.4734	45.3371	44.7316	41.1915	39.6561	42.8948	35.5814	49.9053	38.7958	43.7228	47.109	29.8386	42.8883	45.7737	25.1825	74.8248	48.9403	48.4036	35.3935	31.0806	35.3717	45.854	37.1433
200740_s_at	124.374	157.214	106.736	171.311	207.161	360.636	240.591	82.4865	126.795	116.173	112.615	205.538	303.411	175.663	297.347	442.254	126.774	459.202	235.807	261.487	266.666	360.332	741.767	489.797	417.905	445.086	378.104	430.771	610.489	156.571	101.824	255.927	53.8119	105.205	225.75	114.885	154.816	49.8764	119.926	155.278	96.0792	560.367	253.327	92.5827	73.3295	86.7199	105.25	161.426	486.425
200741_s_at	3267.73	2761.81	4214.94	2306.3	2428.74	2985.57	5338.98	4267.85	3634.91	4772.86	1974.01	2285.01	3320.2	1955.46	2127.1	5592.39	5493.56	3895.72	2723.8	2204.11	3306.46	3245.99	935.044	2990.01	6231.46	3624.83	1816.95	2290.11	1888.08	541.054	386.764	842.255	841.02	295.911	837.638	384.74	242.455	524.025	469.146	1920.06	577.178	1249.33	2042.74	272.281	493.004	1485.56	1002.89	1020.93	3474.66
200742_s_at	231.274	272.737	134.71	286.201	325.816	306.125	158.156	87.9564	60.273	39.9669	186.445	381.359	406.685	418.696	666.24	98.1975	36.0077	133.069	58.0877	74.2956	206.09	146.784	1091.29	834.036	189.339	544.381	379.644	1037.12	236.35	424.204	237.405	475.773	155.377	583.639	359.163	172.341	578.005	100.583	274.548	168.1	196.265	321.821	83.8586	182.969	438.203	73.7978	196.395	316.626	833.061
200743_s_at	558.862	621.827	401.559	484.527	597.479	638.702	327.896	393.069	415.901	142.907	364.05	647.949	867.692	470.033	1187.15	264.863	94.6848	404.362	304.131	281.449	410.641	289.685	255.024	1271.09	528.129	1068.28	464.409	1165.38	505.456	529.965	224.203	615.532	251.971	440.511	328.401	339.14	554.232	252.913	493.937	323.629	219.585	493.605	346.066	318.97	365.321	127.58	223.455	358.668	977.229
200744_s_at	118.628	133.509	124.008	121.676	116.089	119.727	94.0799	115.614	89.3084	60.587	95.8532	111.6	127.596	95.454	132.866	99.2832	54.7514	86.0862	66.2608	75.6165	129.45	117.23	60.0365	151.988	110.603	161.45	167.479	152.816	139.011	83.5386	72.0611	115.412	94.2302	93.3889	90.9026	90.2765	63.1587	99.4845	87.9636	80.9109	81.9013	215.646	443.751	62.8323	96.3922	64.1503	73.0755	90.8114	84.317
200745_s_at	472.749	447.962	427.07	563.483	534.006	586.128	419.615	280.426	484.901	214.508	577.684	724.113	950.421	589.992	848.735	831.553	452.471	1480.19	733.673	583.147	588.603	635.78	370.322	1687.84	1006.28	966.828	943.345	852.69	939.761	232.892	91.7442	228.368	61.9145	108.696	173.136	112.839	95.3636	58.9202	116.614	201.038	167.923	188.992	72.3245	117.404	278.605	140.703	138.652	201.676	1070.9
200746_s_at	659.803	546.943	573.447	529.82	763.613	914.967	658.682	698.034	867.856	315.125	750.082	837.327	1017.09	675.124	954.398	1069.99	412.566	1274.3	686.039	786.589	772.371	731.508	3125.32	1220.48	1219.91	1174.18	802.54	824.341	750.236	284.885	64.4468	440.136	39.5571	98.509	208.441	89.1841	97.7994	38.3372	224.776	215.142	149.147	278.382	53.5661	52.8815	178.991	64.8724	136.777	236.911	966.619
200747_s_at	60.0804	74.5303	46.4137	58.9446	77.7388	125.753	68.2796	50.9666	52.6092	46.4961	33.5797	69.745	136.844	49.8654	103.265	76.2626	19.3712	127.017	84.8462	52.2979	65.4114	62.8313	30.6745	99.3647	97.6175	113.331	81.5527	85.8604	89.5545	83.9412	28.8945	58.8533	23.2856	43.1282	89.3796	34.7024	44.4566	28.0897	44.0586	24.4546	27.3244	165.242	23.131	20.5604	41.5523	23.87	58.0685	27.5012	163.924
200748_s_at	2758.85	2206.77	4073.14	2153.07	2564.13	2605.58	3960.88	3137.19	2838.18	2550.17	2200.77	2901.73	3424.52	2485.81	3784.29	2920.6	3123.64	1719.78	1928.33	3395.27	3867.88	3240.19	1235.17	3290.06	5150.16	3990.77	3357.4	2492.08	3672.78	4513.75	3849.11	4361.36	3558.31	4165.28	2996.4	6190.27	3100.36	8206.8	3800.39	6050.43	3814.24	4759.05	6174.85	5239.51	3554.34	6365.02	2285.48	3347.82	3026.25
200749_at	647.452	699.135	452.423	455.156	559.24	596.325	1345.07	1190.27	1638.56	641.985	334.01	458.185	848.138	253.653	613.335	2075.58	1745.03	1218.41	1249.51	994.811	1094.32	1034.03	835.529	1516.87	1858.9	1191.9	956.154	1164.96	891.397	349.318	34.2014	562.478	82.6697	45.3292	287.014	224.814	34.2821	12.4321	153.578	518.648	216.536	356.342	1101.56	34.2575	178.918	45.8513	226.897	235.636	615.585
200750_s_at	431.427	387.128	322.207	267.025	287.215	419.037	1271.13	952.165	1548.42	492.579	337.029	378.181	604.123	223.629	449.239	1969.22	1020.06	1208.07	1209.94	913.898	743.866	1036.66	604.594	1351.82	1482.82	1162.21	1009.88	965.333	1125.6	407.796	60.9509	855.321	53.8824	88.3505	437.26	149.381	61.6458	103.155	160.903	477.796	252.532	906.917	939.625	86.1273	162.116	231.975	148.517	288.897	729.357
200751_s_at	826.79	976.569	878.077	735.388	686.319	774.646	1116.3	752.485	1220.28	482.922	740.731	738.426	871.249	522.208	882.231	1552.17	1558.53	1792.01	959.074	1194.9	1004.84	1274.78	137.7	2008.66	1719.02	1112.7	1662.61	1655.97	1772.68	696.669	178.574	565.984	188.414	355.608	442.801	194.942	504.665	558.275	456.637	884.812	343.568	309.528	554.873	468.371	582.681	234.292	407.038	338.513	925.98
200752_s_at	31.8237	39.5852	29.1535	39.6046	42.6799	56.6481	36.5817	28.3055	15.5247	23.0508	23.403	30.0902	38.1242	28.45	32.2957	52.3612	27.858	51.0887	26.3832	25.601	36.4106	50.5965	34.8856	56.2623	73.5966	76.891	59.8432	58.4957	44.2384	45.7357	34.461	62.1776	34.9537	44.7326	78.1306	31.5169	29.9526	21.5095	48.3306	19.7266	21.3473	114.127	37.9815	39.1119	35.558	26.0818	49.9952	44.1414	64.9232
200753_x_at	145.586	175.259	89.7351	174.335	177.852	199.357	233.769	152.713	163.538	164.545	89.0275	179.143	316.179	156.633	233.591	262.159	104.997	340.252	268.31	117.042	191.43	184.037	209.637	366.666	180.946	240.886	279.02	262.838	304.105	147.705	37.8875	214.294	52.5869	46.9337	204.953	126.134	39.5424	57.2007	69.7799	88.2795	91.5693	270.973	54.5906	80.5026	80.2284	69.614	117.373	122.139	497.349
200754_x_at	4012.72	3634.96	4437.9	2970.4	3107.26	2580.36	7336.53	5878.16	6144.23	4344.9	2569.4	3232.08	5161.46	2508.96	3279.66	8665.52	7600.66	5722.33	5044.48	2935.91	3971.84	4298.57	3753.69	6925.66	6712.59	5009.45	3664.28	4175.59	2604.73	1669.91	182.244	1715.77	582.847	481.235	1751.05	1901.04	239.412	398.805	891.046	3272.44	1847.63	1742.67	2810.51	208.19	729.057	1775.95	2138.78	1271.49	5038.08
200755_s_at	67.4141	76.9984	78.8746	69.1355	104.455	79.0124	185.943	99.3845	81.3948	33.4504	34.8408	75.5955	213.637	41.6083	105.448	249.425	83.5196	283.05	246.282	143.175	166.618	179.756	86.575	717.81	190.508	308.428	435.025	387.017	186.867	67.0016	30.7257	78.1065	29.2348	24.0088	116.114	69.8461	86.8984	22.9433	69.4409	62.535	42.1719	132.565	41.8162	28.3431	32.5662	55.1155	82.6812	87.9676	90.3173
200756_x_at	46.0654	33.8869	30.8807	35.2092	42.6976	36.658	48.7532	28.3602	29.6527	33.9316	24.0516	27.0565	29.2941	21.5073	35.3648	38.3432	28.5996	40.5885	31.7548	20.1036	35.8925	38.6678	31.1001	88.8556	25.787	45.2259	96.1032	89.6573	36.1519	31.8097	26.0799	35.7417	25.7384	25.0632	40.5503	34.3522	36.6885	21.776	24.1482	27.1778	34.5719	39.2175	25.0089	28.2721	30.7096	20.1726	36.3985	26.6894	27.2653
200757_s_at	71.5281	83.7609	47.8185	60.3985	78.6195	93.4678	256.679	188.522	72.8419	18.7515	28.5079	93.3672	209.367	83.8444	151.856	419.184	166.65	439.456	369.504	158.695	314.492	416.235	179.011	737.618	288.802	495.278	532.641	483.494	326.267	107.293	33.5558	182.888	34.133	52.0692	170.744	55.2107	67.942	20.1725	47.6403	64.1697	38.9244	241.426	104.747	42.7026	62.8153	28.9575	59.9926	214.843	86.9561
200758_s_at	91.135	96.3016	141.701	70.6244	82.179	79.1163	85.1015	89.7548	101.848	90.4505	86.888	84.3335	94.5134	77.5318	79.4452	142.193	92.0036	120.915	101.924	120.385	127.803	197.965	108.247	217.141	144.291	180.321	139.709	101.5	184.962	79.1627	110.671	99.8897	62.623	68.1242	97.3325	79.2744	81.4688	111.682	89.8839	152.129	66.5482	164.92	84.8727	84.9591	69.7062	55.4598	107.433	82.8277	72.023
200759_x_at	562.626	359.315	277.271	346.43	521.361	392.633	412.017	275.212	335.474	139.009	383.508	509.706	581.109	438.299	690.998	546.102	262.586	697.18	843.759	620.849	462.383	585.066	1173.16	841.409	564.269	676.806	647.582	416.958	1145.96	368.499	89.7764	408.656	94.5882	142.538	237.356	214.986	284.617	84.5738	284.226	194.872	150.779	411.451	315.925	133.367	347.501	372.348	223.323	234.202	1281.07
200760_s_at	521.154	427.406	623.2	673.622	655.062	1026.61	591.681	442.585	507.1	854.486	845.012	847.622	817.773	626.552	1192.22	324.647	194.118	1096.26	839.324	1053.04	477.209	784.177	2133.13	1187.34	1039.76	1094.04	1526.2	835.786	1049.12	1002.78	244.561	852.517	429.557	390.762	523.463	709.565	975.232	442.335	713.482	588.599	329.736	317.505	598.048	478.571	798.591	1947.17	797.248	311.19	777.652
200761_s_at	917.717	852.002	1177.63	1007.02	1249.22	1259.34	1046.63	1197.2	1777.85	1264.67	960.115	1079.31	1326.48	732.198	1455.25	850.984	673.455	978.604	986.158	1529.2	948.782	1164.5	1192.47	1351.36	1871.11	1380.09	1679.39	1324.17	1571.81	697.281	420.788	717.699	608.013	704.96	542.038	1359.82	753.932	923.847	627.107	1447.95	574.242	641.053	828.504	795.585	850.868	119.667	943.518	577.604	1564.57
200762_at	3278.1	2565.53	1860.82	1407.1	1999.37	1149.19	2368.69	3021.51	3012.9	847.423	1071.63	2000.02	2985.96	2020	2475.47	2447.34	2595.3	2462.67	2560.36	1415.71	1394.95	1501.24	801.901	2134.62	2341.57	2138.57	1551.27	1241.18	1832.38	304.957	155.803	356.724	157.163	140.158	319.392	246.007	435.829	26.5226	429.47	789.772	224.713	404.325	1095.61	260.87	370.756	484.083	901.782	621.974	3439.18
200763_s_at	2696.04	2288.14	3028.14	1767.81	1603.66	2379.9	5867.05	4406.81	4144.8	3472.68	1750.88	1967.94	2732.05	1582.06	1981.91	5401.62	5037.64	4127.13	2534.97	2918.24	3792.92	3978.22	2084.55	3312.04	6183.36	4313.51	2621.07	3452.77	2663.5	789.309	492.955	966.238	982.308	598.536	943.732	1249.71	360.252	660.158	739.025	2399.59	730.106	1672.52	3922.58	435.395	730.109	1851.38	1089.6	1327.93	3097.42
200764_s_at	56.769	63.6556	54.7978	48.1312	65.9209	65.7548	76.7805	75.3792	56.7495	34.3421	43.6985	49.5838	49.1533	44.9539	62.5995	98.999	55.3353	59.0117	36.5348	82.346	111.209	151.6	74.3828	97.7431	93.1513	102.623	119.657	90.8932	102.728	177.648	119.471	290.546	116.136	175.777	144.172	94.5384	113.798	99.009	120.226	111.191	94.5531	243.04	57.1945	155.509	141.254	63.8597	63.3697	83.3045	51.6306
200765_x_at	81.133	68.6133	34.6087	40.9483	72.63	74.2694	97.8958	72.673	58.8447	16.0852	17.0638	63.2811	115.641	54.0862	150.253	224.837	69.8733	244.009	176.821	196.539	249.603	351.533	170.091	457.792	219.578	326.603	539.315	337.213	365.492	533.836	203.761	816.648	344.917	649.409	415.98	233.242	347.63	275.314	688.258	396.249	237.077	601.425	881.621	546.451	499.056	239.508	191.128	185.138	169.166
200766_at	32.8404	34.9018	32.8931	31.6274	40.3018	33.6506	67.0623	25.0355	25.1395	27.1687	25.7589	44.67	52.8021	36.175	80.9237	35.1019	26.0076	43.0491	45.3156	143.646	37.27	41.7891	83.1851	95.8949	42.0442	100.072	60.1373	115.005	78.0316	70.1931	37.1486	89.0843	37.3668	50.5027	54.6172	51.7907	56.0026	44.663	53.5915	36.1322	37.697	68.5549	46.1811	58.4519	52.1043	50.2811	45.0392	38.0137	47.212
200767_s_at	29.4189	26.3665	20.1458	31.8256	34.2943	28.7128	26.1247	19.4006	31.8661	14.7552	21.335	25.3999	34.0674	19.1309	29.9337	30.1745	21.3029	29.1304	25.6846	20.8039	28.6132	31.4123	29.3951	32.1797	23.9734	24.9216	66.4784	43.4843	28.1645	22.7305	17.3029	16.6262	16.654	16.4357	17.5302	17.7358	21.7512	23.7708	20.667	18.7693	17.3358	19.3047	22.8687	20.3255	23.964	17.2265	21.7077	26.2808	246.578
200768_s_at	2321.41	1785.86	1914.93	1115.38	1691.15	774.235	3828.25	3778.9	4302.41	1005.69	1143.03	1487.45	2150.09	1133.8	1756.8	3921.67	3586.65	2883.27	2828.86	1388.17	2197.28	1670.68	1527.66	2479.86	3086.34	2342.45	1256.8	1685.94	1215.43	773.063	68.5195	610.597	79.8955	67.2609	409.918	193.129	35.7277	57.8323	686.659	1129.71	376.856	454.066	991.042	65.2427	137.09	435.45	634.684	365.998	2973.71
200769_s_at	37.6296	28.0518	28.3273	29.0978	37.776	34.9971	17.3998	13.4842	9.95417	9.7531	7.44692	13.3032	15.0369	12.8007	21.8503	26.7695	11.0818	23.36	11.9149	12.4562	17.8633	20.3747	14.3638	26.29	10.4881	16.7786	35.7541	43.2574	20.7582	11.9313	12.1875	12.4411	10.2067	9.85572	10.7201	12.1503	11.3266	8.08888	11.1152	8.11022	6.84183	16.1213	12.2609	12.9835	9.71148	7.87849	10.9836	10.0754	22.2821
200770_s_at	37.1309	34.1379	34.7698	28.8635	24.5323	44.2351	37.5043	38.7366	74.3344	25.8036	31.3983	28.2212	30.2826	22.8338	29.2164	43.4921	33.2523	35.6835	39.634	46.3857	44.9699	59.8922	31.4874	38.9549	51.2644	47.3934	43.8564	37.3773	35.7205	38.4902	38.9325	46.1965	39.3968	32.5486	34.2201	37.1051	41.1097	69.3934	33.5048	53.0811	47.0658	40.6478	34.9795	39.3201	31.9597	27.1846	28.9858	34.9134	35.4048
200771_at	149.305	154.113	97.9853	222.841	180.322	305.128	204.513	135.795	106.041	46.0528	114.442	160.508	354.912	106.296	153.732	231.51	112.623	405.19	510.136	165.553	153.548	271.343	131.696	232.148	82.6894	238.922	209.648	300.199	179.652	26.1083	21.9649	25.3052	19.1245	19.3916	26.3685	43.9081	42.6692	37.7328	35.269	123.963	23.5747	24.1365	44.6902	41.1659	31.7952	26.9921	35.2271	88.3414	284.434
200772_x_at	4174.84	3912.69	4835.63	3481.22	3545.56	2885.9	6459.57	5705.25	5197.26	4979.25	3441.13	3712.84	4865.9	3214.52	3530.56	9349.37	8571.63	7032.29	4575.3	4553.86	4546.23	4424.5	4458.62	6791.33	8587.86	5884.83	4127.79	4635.72	3520.21	1020.76	321.262	1677.95	581.135	483.042	1489.21	451.294	333.378	419.119	948.142	3989.72	1566.28	1751.15	3214.86	383.156	763.665	775.206	1856.59	905.47	4722.78
200773_x_at	3364.66	2895.92	3379.67	2490.56	2862.81	2480.59	4358.62	4013.8	3896.22	3336.19	2005.8	2275.63	3293.24	1755.46	2312.63	4750.55	5931.3	3767.93	3738.29	2482.64	3496.17	3078.67	2326.67	4122.65	4239.83	3042.5	3009.16	3294.12	2607.67	1309.77	491.581	1323.79	1198.16	1043.75	1327.44	2574.76	488.674	1054.3	1274.6	3097.96	1519.05	1442.78	4337.29	532.752	1206.91	2623.57	1974.51	1579.69	3879.01
200774_at	688.424	738.129	556.608	675.501	897.47	884.775	601.285	418.624	1028.37	218.119	731.217	760.645	856.272	579.328	922.882	914.121	599.157	982.842	930.422	741.747	616.912	742.44	2780.89	1278.5	1132.1	878.298	1227.9	1290.36	1713.25	567.626	64.8619	446.944	200.263	437.811	417.586	352.647	357.452	179.897	481.731	534.463	189.2	416.676	449.117	182.04	363.085	185.308	340.137	375.596	1216.25
200775_s_at	4560.42	3697.55	5023.77	3407.52	4276.79	2952.1	5249.82	4956.71	4505.66	3547.9	2221.67	2834.72	4420.59	1947.19	3376.55	5061.66	4577.65	3494.79	3949.95	4496.92	5324.57	4741.39	2444.31	4411.65	4862.05	4243.69	4601.39	4895.63	4383.83	5575.08	4434.52	5088.36	4535.06	5618.92	3455.24	5326.72	4454.17	6063.85	4921.35	6129.57	3979.5	4016.74	4666.78	5225.79	4554.92	6004.29	3115.76	3962.73	4320.18
200776_s_at	63.8474	63.9544	50.9247	61.7891	73.367	118.035	74.4041	35.5315	32.5049	30.4225	33.254	54.6982	68.7254	40.8449	95.8946	105.747	21.9836	63.843	47.3243	29.1054	54.8899	84.0623	54.8303	166.844	58.7961	100.189	167.218	135.875	118.21	43.9372	37.2967	63.0167	24.6084	41.6901	99.1619	34.7049	36.6242	20.0659	26.2888	32.1471	34.4552	110.647	883.936	37.678	42.6179	25.9734	49.4232	59.3752	86.6152
200777_s_at	1017.41	841.965	987.142	629.519	807.67	1032.85	1520.18	1626.14	1978.55	668.032	893.542	936.976	1259.8	623.676	1097.84	2029.88	1956.29	1592.34	1384.49	1069.54	1007.92	1215.91	1149.84	1783.04	2051.95	1456.75	1353.06	1457.36	1362.6	353.116	66.3555	597.687	118.271	101.427	323.205	197.895	161.085	90.7985	212.814	885.527	360.175	367.543	1003.94	81.1555	253.993	500.826	427.103	288.331	989.346
200778_s_at	90.6393	142.503	111.521	179.629	236.987	173.851	54.6284	86.0572	39.5615	48.5465	42.1424	123.331	190.104	116.32	248.265	115.298	62.67	141.602	135.737	104.495	222.836	254.586	163.741	407.183	125.25	193.057	659.068	491.797	660.601	473.828	568.384	475.437	361.038	986.833	225.78	730.973	1244	364.872	810.811	288.636	128.924	256.244	276.954	340.316	601.344	139.774	197.556	278.201	383.435
200779_at	594.255	648.645	858.003	686.771	826.75	877.05	2106.63	1023.53	1857.21	1256.68	870.075	819.144	852.94	624.863	970.916	1724.25	1311.91	1045.61	1812.48	1451.4	1680.1	1747.11	1710.17	1754.56	1955.23	1614.84	1963.08	2113.44	2167.95	836.47	611.738	956.996	611.374	733.818	700.103	1775.28	645.644	1346.43	820.951	1834.84	592.333	1083.71	2152.22	954.006	779.431	1219.13	1010.2	678.246	1021.19
200780_x_at	698.554	1055.26	1289.32	1376.07	1148.52	1608.01	1907.49	1274.92	2065.69	884.141	1372.26	1309.63	1683.16	840.6	1515.12	1445.44	868.633	1282.46	1092.76	2260.98	1923.29	2014.11	1504.03	1487.66	1915.39	1797.92	2019.49	1662.23	1934.02	1748.7	1508.82	1246	2310.87	2026.62	761.369	4429.66	1278.88	2247.85	1874.85	3716.46	633.579	1850.6	7117.71	1396.08	1660.89	4702.26	1035.35	673.666	1529.91
200781_s_at	4607.55	4545.56	5750.31	3638.82	3933.79	3836.78	7805.72	6032.21	5202.56	5257.48	2491.75	3196.35	5073.79	2123.4	3888.19	6723.09	6028.08	4670.06	4131.51	5032.1	6008.54	5694.41	2854.31	4583.16	6775.51	5689.02	4215.09	4936.71	3578.31	1785.19	1184.75	1682.07	2027.69	1349.88	1450.31	2464.91	1066.19	3141.42	1594.82	5001.46	2062.7	2934.3	3828.05	1837.44	1546.75	3388.4	1627.22	2340.34	3951.42
200782_at	111.665	80.3786	36.0067	70.1155	64.7265	67.7023	74.3908	48.4857	25.7572	21.4356	25.4787	95.0208	225.368	65.6398	216.291	41.6755	26.7656	82.0228	43.7079	24.7228	49.2042	98.3855	31.2019	109.932	65.1048	228.774	101.501	79.9589	73.2097	22.6663	26.9935	23.1761	24.0333	25.4759	20.686	22.7275	39.1132	19.8902	28.3665	37.5631	25.6667	23.7043	31.1394	37.0876	21.7492	19.7222	34.2833	40.2748	265.19
200783_s_at	651.804	641.65	210.038	208.21	323.067	375.305	2441.61	2116.66	3303.15	391.605	725.502	679.354	1011.73	823.756	352.275	3206.23	2922.78	2107.94	2480.85	1212.45	1570.63	1348.63	389.606	1761.92	1864.53	1376.36	1013.49	1073.02	1306.29	229.744	193.462	299.988	94.5149	37.0671	203.876	107.875	55.2779	27.7029	69.3326	532.503	165.819	387.343	140.927	61.0768	93.2144	89.5452	199.295	142.057	1106.08
200784_s_at	45.0279	44.1647	37.1413	41.6118	37.915	40.573	45.8432	39.7041	43.7773	36.7619	41.9456	44.5022	55.9553	37.6068	44.4357	34.7771	54.9538	47.0488	36.5153	60.5138	35.0142	45.8266	43.2674	37.9718	43.2352	43.2648	40.8004	31.7721	34.0896	42.5625	47.7796	46.8956	44.7912	61.9165	40.837	34.6878	40.8311	38.9287	48.2495	38.6097	49.0996	46.5497	35.4335	45.2537	34.672	37.2191	37.7924	39.6556	48.7266
200785_s_at	38.9616	40.1854	29.4651	44.8427	49.6193	39.4851	23.229	22.3382	16.8677	13.5029	11.4253	23.3079	23.6767	23.5492	46.3283	28.9007	26.6969	43.3208	32.5176	24.1934	24.8945	22.4562	31.1626	33.7279	22.1309	119.243	49.9843	41.8078	63.0629	39.5053	28.4276	58.9557	26.6537	42.6412	44.2698	34.8441	47.0785	15.5635	40.4186	18.0173	21.7854	140.082	43.7459	33.8656	37.9837	24.8344	38.1642	65.9276	42.3149
200786_at	511.679	490.04	450.511	331.7	417.187	552.36	1116.42	1055.51	1743.53	525.837	405.702	518.748	811.445	315.865	696.399	1335.82	1163.9	1191.05	900.387	1577.12	1355.75	1632.31	749.768	1773.3	1900.99	1438.75	1663.19	2282.28	2008.5	1138.5	554.889	953.536	708.232	1166.8	693.217	1210.45	566.967	1789.64	997.509	1519.37	597.462	797.626	1288.41	1074.09	881.961	581.767	718.714	526.826	1385.34
200787_s_at	54.5119	48.7313	67.25	60.1986	42.1281	55.6967	41.0098	99.5207	81.6948	36.0133	31.484	40.834	52.4118	36.9259	45.6287	59.3044	67.0926	30.7425	33.3821	36.7513	61.9964	67.7513	30.6773	36.901	65.2442	45.433	38.232	40.7748	48.4172	33.2355	68.0713	37.8837	52.0595	45.6118	35.1306	41.7275	44.3779	56.674	41.9906	42.1358	36.973	33.3757	34.8016	39.2926	42.1034	46.5576	34.9823	27.113	45.1925
200788_s_at	144.885	121.427	50.5047	75.8332	79.1835	135.66	75.6755	21.1537	35.3886	21.7609	18.3716	67.4937	167.135	38.8293	174.052	114.528	28.4063	39.6652	43.4422	49.4435	67.7739	77.9261	40.2775	50.0019	61.8025	234.673	118.413	37.7817	45.4575	25.6541	26.992	51.2855	16.6323	18.4304	20.9391	26.8544	19.4962	24.0749	22.0799	39.818	19.4022	34.68	18.4551	22.2989	17.0314	21.6478	19.3365	34.8628	242.827
200789_at	53.5953	58.6838	59.7887	75.5616	62.7655	73.6266	88.7343	62.374	99.5455	67.6256	61.3801	61.929	61.4522	59.9869	65.0063	99.7781	66.0166	69.038	49.944	110.211	127.678	176	93.6486	90.1638	156.903	149.863	101.38	155.27	89.8989	91.2921	57.5938	68.696	75.5477	54.4947	38.4814	80.3809	74.2068	96.8654	55.8011	85.6598	52.603	148.664	64.5726	64.1959	80.7249	67.5636	44.0723	54.8201	57.7278
200790_at	74.5579	159.644	143.225	191.011	119.554	588.385	145.597	143.881	124.846	55.17	76.2994	159.61	401.455	111.57	189.905	362.355	90.0869	258.191	80.7468	350.396	506.854	543.213	161.336	736.954	318.306	331.088	820.357	650.75	1037.17	1250.29	1242.52	1181.16	1000.4	1660.23	775.11	543.864	2407.44	1530.48	1673.16	767.268	569.802	549.954	314.667	2035.45	1745.31	339.357	618.423	519.665	351.072
200791_s_at	3892.41	3138.56	4339.35	3103.6	3594.35	2018.71	3907.55	3647.73	3206.33	2316.44	2324.17	3032.74	4399.66	2117.5	3906.89	4951.16	5938.37	4355.43	2185.26	1901.13	2377.95	2511.89	210.836	5918.42	9243.47	4096.14	2067.53	2293.19	1823.48	184.048	105.713	501.334	316.096	31.9263	280.433	133.658	237.494	88.7356	521.305	996.626	571.089	275.243	1029.28	81.611	552.067	1255.16	1631.32	959.625	2394.93
200792_at	252.85	253.42	137.469	176.834	156.691	393.391	428.147	212.413	391.352	217.873	125.9	231.668	477.094	131.987	363.333	1182.3	446.691	1019.23	608.235	840.636	552.033	646.734	163.221	1103.84	1174.12	1180.81	816.164	778.854	724.478	435.334	77.9264	451.604	67.8154	86.792	210.894	113.094	90.2169	65.2617	79.1897	266.322	94.3783	502.716	82.4449	61.3785	94.477	36.2441	143.514	247.281	282.833
200793_s_at	36.8418	38.528	35.1779	32.1899	30.9345	34.4245	27.7142	35.2838	86.7221	26.3262	42.0886	32.5723	29.973	25.7061	34.7107	32.7831	34.9117	35.0774	27.0996	34.6568	49.8777	43.4111	33.8754	32.9292	49.2436	41.4314	41.5398	33.8181	37.8906	67.4491	36.6502	77.8742	36.3607	44.2999	33.5063	49.3196	47.8018	39.9661	39.7654	65.5324	30.3371	76.7498	24.8269	43.9381	42.089	31.8248	27.9557	36.6978	42.1403
200794_x_at	592.06	604.949	575.992	569.216	512.819	978.813	444.1	745.543	457.771	650.183	842.411	776.794	662.584	737.798	884.14	546.67	268.513	412.435	422.32	442.941	682.379	692.261	1324.5	819.812	763.234	844.364	891.237	983.964	964.552	553.409	501.401	576.921	399.567	873.832	417.678	405.275	401.861	365.972	440.247	465.782	230.475	506.72	914.508	479.378	443.652	214.332	402.159	274.018	736.011
200795_at	50.9008	52.5412	45.9613	56.4458	65.6527	62.8273	60.32	70.7425	33.6605	95.0121	56.3131	63.3271	57.2938	65.6353	75.9458	73.954	119.713	72.7111	174.029	83.0698	79.3095	105.95	80.115	66.8592	71.4469	71.2393	77.0731	67.8272	75.0904	71.3205	91.9223	68.9821	83.7642	70.6045	79.0275	108.346	83.8073	121.938	91.2037	58.3208	72.8141	84.9001	52.1091	70.7552	54.6021	105.076	62.9007	64.7767	57.6819
200796_s_at	24.1859	26.5297	24.538	22.9427	25.7081	25.4885	28.3187	24.7746	34.7373	20.9573	25.8042	24.9982	22.8267	26.3959	25.1167	24.4665	27.7488	26.2364	23.1607	25.0441	24.7147	28.2361	27.1976	29.2967	28.3513	26.5104	26.0483	33.3762	32.7936	23.0565	23.3082	25.587	25.2992	26.1566	26.7052	24.0313	29.9101	22.9534	29.1041	30.4187	23.5846	24.8751	29.68	29.0083	25.6569	24.2643	31.3625	26.3953	23.1894
200797_s_at	1129.58	545.723	686.785	658.681	1030.75	634.209	1543.33	1310.19	1351.2	1854.69	628.519	888.021	1777.01	421.225	1321.81	673.739	253.906	820.957	381.503	438.911	247.066	335.841	66.7746	864.351	962.491	885.277	523.836	477.548	677.479	141.676	49.0851	362.656	65.4717	83.2731	234.681	99.7091	129.761	38.1348	132.252	253.503	143.324	230.486	388.475	157.274	164.327	138.406	292.874	142.342	1861.1
200798_x_at	209.489	109.284	67.7627	106.802	214.164	207.358	78.5203	57.7021	44.5148	77.8891	92.2865	143.415	256.375	68.668	260.379	50.1167	16.4597	98.6326	37.4497	33.7952	42.3111	35.9047	24.7679	156.896	70.1907	150.753	110.428	124.651	93.0283	56.6397	19.4294	101.593	11.9778	27.8883	72.7445	20.3479	33.2884	11.0766	30.8486	19.9489	22.1139	61.8696	28.1786	21.1872	45.6684	7.33741	70.6822	37.7155	242.388
200799_at	751.283	1033.1	261.985	844.633	1200	247.06	842.727	973.274	834.558	400.288	476.068	663.142	565.303	773.809	928.627	770.424	771.62	570.168	865.393	646.347	730.341	565.039	1221.65	828.775	817.773	794.81	597.877	771.86	975.382	556.969	535.009	543.029	1157.67	356.547	452.929	1404.98	377.688	643.431	498.155	882.757	657.369	439.965	2296.95	366.132	528.461	2017.28	1023.46	734.489	935.444
200800_s_at	43.1481	29.6821	72.4817	29.5477	48.0633	14.808	12.383	35.9605	16.172	8.01123	6.81307	15.5288	12.7039	32.6543	20.5748	9.78105	9.20345	15.1537	9.99209	16.9069	19.4403	10.9613	9.32574	28.7925	14.4811	22.9134	21.4792	16.192	11.0393	19.2944	9.34608	57.4645	15.9396	14.9175	20.158	22.1975	11.2849	14.0534	21.3059	13.4782	15.4633	28.8754	91.1887	11.708	18.0248	21.7779	28.2235	53.3298	56.3323
200801_x_at	8282.76	7046.34	8545.47	7615.79	8788.45	5485.78	10340.2	9089.4	7178.98	6984.06	4145.39	6088.12	9852.65	4339.44	7751.4	9562.35	8151.07	6567.72	6980.29	7670.04	9396.92	8303.55	3281.23	9518.76	8704.67	8810.68	8705.65	9472.88	6200.16	8575.93	6475.98	8758.02	6145.98	8946.11	5783.34	7473.73	7264.87	8890.52	7183.44	8777.68	6843.74	7519.96	7389.98	7213.15	7479.39	7738.99	5932.49	8624.02	8650.76
200802_at	41.0568	48.4926	45.5009	44.4667	42.0507	83.1505	46.0033	56.5489	40.0343	50.9796	28.1784	44.3092	81.6594	26.0635	64.2718	114.727	27.1735	68.1004	47.2464	91.555	146.1	224.765	61.0539	128.177	148.897	180.199	243.068	175.232	117.093	306.326	141.508	469.22	205.234	300.569	163.624	102.453	561.683	139.243	162.535	72.748	75.6014	563.031	56.9017	189.629	253.941	53.1425	55.9723	91.6915	48.6294
200803_s_at	254.115	306.687	175.414	248.339	476.199	357.78	199.333	210.449	139.298	73.0562	256.862	397.452	408.85	364.324	652.209	305.166	139.574	336.014	306.665	343.974	531.002	633.091	381.129	896.494	733.364	704.099	1009.2	1433.33	1242.67	2545.47	1768.99	1671.94	1695.8	2697.01	910.525	3565.83	1675.62	3120.17	1646.42	2465.44	660.546	982.293	1876.77	2009.43	1708.16	1180.53	1071.71	905.157	360.157
200804_at	1197.03	1138.92	1127.31	1069.16	1275.69	1081.54	1389.27	1108.16	1383.3	1380.32	1187.55	1204.45	1352.23	866.916	1511.74	1232.63	874.597	1215.62	1087.53	1965.98	1286.33	1364.35	2441.68	1639.72	2106.31	1830.57	1881.92	1763.85	2194.69	1303.62	803.081	1046.31	833.277	1488.87	899.926	1674.65	1146.98	2355.93	1445.04	2219.66	1084.13	625.592	1512.33	2006.43	1278.96	1772.25	862.367	842.118	1283.12
200805_at	155.816	237.155	98.3741	158.708	126.867	178.054	380.795	219.029	256.912	107.917	137.553	243.646	396.045	165.292	391.357	300.8	181.265	496.532	375.416	250.761	244.836	318.136	93.1736	699.903	345.9	597.816	420.946	365.626	237.406	174.936	60.6087	391.575	38.7879	36.3431	207.215	67.1573	58.7138	79.9493	59.285	121.311	98.4185	282.073	66.6533	47.8272	64.3955	85.9969	109.073	219.59	682.72
200806_s_at	290.611	412.679	137.55	256.039	246.705	251.234	468.348	369.897	603.165	169.864	175.565	253.396	253.122	260.931	355.554	1070.41	607.248	1494.36	655.578	614.077	429.51	531.098	2006.59	1145.74	910.917	579.879	868.525	724.415	1016.64	109.146	39.2942	92.6729	28.6586	19.8248	230.929	75.919	47.9843	13.1387	87.077	192.829	78.4054	231.649	45.47	30.9108	143.26	13.6259	155.463	102.153	592.91
200807_s_at	388.71	464.12	193.367	283.413	263.673	361.459	780.387	733.778	956.401	131.635	208.937	263.875	346.472	218.927	305.922	1240.45	787.387	985.426	565.08	536.605	484.37	630.467	646.692	819.578	947.338	589.416	645.53	622.387	821.094	86.2205	19.5861	183.604	17.6093	13.1475	162.449	81.38	40.076	8.15793	89.7597	245.323	68.874	298.277	206.583	14.7574	97.2063	12.1209	77.8464	85.3842	686.155
200808_s_at	57.3542	40.7524	151.329	73.899	66.8411	45.5636	65.6753	52.4925	166.354	84.6001	48.1378	48.8096	51.9268	32.2044	70.5064	59.202	63.5369	51.1189	53.9386	79.6086	74.1709	68.276	58.6055	161.898	79.6384	150.67	132.437	98.1427	74.5807	50.0424	60.8561	45.5351	48.6936	52.7934	57.6193	53.517	57.4575	101.246	50.4118	75.985	57.1528	45.4637	46.206	42.7706	56.2728	51.5641	59.7144	55.4821	205.872
200809_x_at	1687.64	2070.41	2189.61	1584.56	1340.33	1886.71	3591.61	2448.46	2779.34	2063.83	1427.42	1345.08	1837.44	917.032	1360.97	3262.32	4034.19	2499	1688.6	2243.05	1859.85	2379.72	1439.93	1923.49	3969.33	2365.94	1614.74	1616.18	1901.69	398.27	259.347	597.277	318.647	316.869	470.61	638.769	220.981	266.345	511.973	1463.03	410.776	914.318	1195.44	334.247	365.702	894.129	650.565	599.729	1845.33
200810_s_at	2924.44	2799.63	3770.98	2662.15	2392.92	3095.47	5061.06	4293.47	4512.43	4779.55	2289.03	2660.59	4020.45	1738.54	3131.86	4445.16	4423.73	3237.76	3946.51	4002.98	4325.46	3920.92	2685.02	3691.29	4390.52	3886.61	3830.58	4383.94	3502.85	2351.45	2395.52	2049.01	2173.25	2582.96	1663.92	3309.43	2156.79	3595.76	2475.88	4815.91	2319.23	2104.3	3296.78	2386.64	2245.92	3637.68	2251.55	2437.87	3530.64
200811_at	2290.42	2353.64	3159.55	2159.39	1828.1	2769.59	4191.89	3512.27	3758.12	4400.32	2191.56	2377.36	3320.62	1744.14	2516.67	3359.16	2887.45	2722.78	3479.89	3702.25	3731.71	3560.84	2999.71	3344.56	3998.34	3426.9	3557.61	3320.37	3049.5	1930.84	1770.35	1639.86	1559.8	1983.4	1324.5	2835.59	1663.54	2676.66	1882.58	3657.85	1651.64	1630.31	2446.29	2146.06	1672.97	3104.48	1781.11	1737.59	3074.3
200812_at	168.808	157.429	85.6149	75.3886	107.003	224.225	149.865	71.9852	117.928	31.357	44.1545	92.646	230.031	58.5128	123.963	260.659	60.6407	352.499	185.554	157.166	171.441	189.974	45.2154	409.524	211.341	302.162	209.814	229.709	472.647	94.0216	20.1298	212.527	19.5727	35.3642	82.2965	37.7582	35.7379	16.8624	41.3742	45.9063	36.6517	190.377	24.9691	105.394	59.368	24.6566	37.0895	99.0474	172.429
200813_s_at	955.633	861.946	1428.02	1088.93	1332.82	1111.63	3131.38	1016.34	2737.93	1213.01	1980.09	1631.09	2148.36	1035.88	1606.24	3030.29	2617.56	2983.84	1496.29	2712.1	1765.81	1958.18	164.001	2567.84	4237.69	3233.86	2163.72	2047.62	2127.68	686.862	250.151	814.561	428.248	243.841	826.934	189.737	621.621	428.298	665.958	1202.84	678.952	494.913	751.93	513.615	585.75	178.531	805.68	583.462	870.683
200814_at	553.256	497.621	404.219	349.349	437.491	806.136	796.034	869.849	1067.51	577.859	528.472	565.634	782.235	321.911	769.215	861.297	409.393	949.421	739.31	1353.02	910.507	938.518	87.1398	710.459	1031.04	972.169	942.833	801.38	881.717	977.561	504.528	701.908	582.47	850.365	289.561	1143.69	743.353	594.016	528.266	1058.43	337.855	725.008	1373.09	775.612	618.059	416.806	335.92	465.932	782.036
200815_s_at	239.417	144.084	140.828	219.1	254.51	349.489	221.028	107.468	77.0954	101.308	115.303	181.142	289.364	129.652	248.889	104.576	43.0308	136.829	90.8662	80.144	165.006	119.135	53.4345	242.327	78.8996	297.386	298.714	244.434	235.085	187.686	126.162	463.665	118.54	157.975	259.414	217.959	358.106	104.412	227.15	160.471	137.606	244.964	309.993	251.3	129.238	119.017	246.482	133.878	171.977
200816_s_at	279.312	193.489	185.572	293.51	359.076	308.197	294.804	463.711	480.95	143.079	257.909	334.982	717.717	187.2	363.377	519.138	165.358	850.882	542.557	473.559	302.467	309.178	112.863	849.107	545.16	691.168	399.975	409.092	493.412	217.347	43.4732	317.456	30.962	42.4099	166.716	50.0968	57.4838	22.9097	156.785	162.239	106.945	158.539	34.1011	59.9473	100.933	24.2921	110.888	158.791	484.458
200817_x_at	3371.76	3140.33	3717.64	2917.2	2410.06	2617.66	5895.39	4803.04	4876.01	4928.64	1949.92	2092.5	3993.83	1072.52	2295.36	4322.81	4010.34	3993.15	3754.21	3668.32	4026.75	3553.86	2227.24	3392.1	4961.34	3995.44	3042.71	3731.47	2659.56	1118.26	681.896	1151.85	907.94	749.757	1153.18	2114.65	663.456	1676.96	1071.82	3439.45	1405.18	1516.37	3484.51	1117.7	989.713	2064.11	1833.76	1551.43	5186.93
200818_at	560.447	576.373	364.968	296.689	440.883	588.516	1075.41	1081.56	1213.42	681.321	333.19	432.438	635.773	272.876	604.971	1395.03	792.69	911.773	738.148	1039.03	1056.3	1269.18	912.457	1065.08	1499.43	1159.64	850.862	931.013	1013.11	607.727	78.4611	863.926	212.185	129.22	322.326	132.841	174.662	142.398	167.108	411.887	295.931	843.155	125.114	150.301	216.273	28.8359	112.887	394.675	822.63
200819_s_at	1440.71	1135.26	1648.53	727.484	465.178	2654.82	3181.98	2334.98	1890.09	1713.27	1083.59	954.01	858.337	1139.12	781.839	3695.54	3977.97	1787.05	770.302	1023.91	3535.16	3819.59	641.155	1099.92	4551.39	2606.47	1366.86	1899.92	2376.99	499.961	589.2	579.85	714.965	584.41	731.282	826.003	230.394	195.361	460.856	511.841	167.259	2148.35	1282.34	245.374	436.647	73.5265	459.489	573.356	951.303
200820_at	122.183	83.3277	61.8186	63.0104	67.1552	134.587	54.5662	64.09	59.9801	35.2042	38.5486	63.9901	98.504	57.52	76.7664	173.71	52.7782	108.323	71.9515	75.379	271.825	163.919	78.7065	140.15	208.551	283.543	225.946	142.981	150.411	153.545	111.841	192.834	72.294	244.697	133.78	65.4025	178.835	62.6509	89.8991	51.7082	61.082	501.587	79.3997	103.899	64.9199	56.1396	57.7684	64.6732	812.852
200821_at	219.241	130.979	63.9407	105.909	164.935	206.107	207.134	262.148	217.901	115.36	74.8267	165.914	295.346	101.499	337.821	237.561	134.782	381.788	271.158	195.839	332.405	244.981	99.9098	606.644	242.791	311.895	352.011	605.316	494.487	293.707	90.9529	220.475	52.6064	161.078	127.348	80.7928	256.112	44.9145	145.545	94.6231	56.1464	147.11	80.7957	90.9415	229.051	31.8351	114.141	109.907	529.8
200822_x_at	102.682	77.3709	46.7177	54.6109	70.6666	76.6599	193.224	163.759	105.202	31.5559	32.3294	84.828	145.827	77.041	142.561	357.951	105.053	242.633	166.84	184.598	305.89	387.833	175.383	329.569	286.45	434.31	255.698	287.421	344.565	61.3465	42.5733	92.5788	43.6618	35.5498	54.3906	71.7426	47.9565	26.7301	35.3571	86.3023	46.6642	170.394	143.752	31.8105	45.8275	25.3338	43.3265	76.7734	230.737
200823_x_at	262.685	397.945	361.718	309.07	238.505	979.516	1200	787.209	664.136	389.14	321.849	369.707	465.593	402.846	309.482	1238.34	1042.55	710.562	432.75	385.226	886.669	1302.96	1361.07	474.063	1848.23	1090.68	387.587	460.304	861.136	119.692	91.3173	244.525	92.3873	64.2985	200.076	50.2486	65.4605	14.5451	36.5401	101.04	48.1882	945.653	194.067	30.6406	73.551	17.8137	144.815	207.348	494.393
200824_at	146.826	215.858	72.9854	71.9624	122.06	94.6501	161.117	131.925	83.9863	55.7099	62.5546	149.124	244.955	105.006	307.35	455.853	103.067	291.84	380.107	230.803	343.721	311.071	336.392	411.176	251.091	664.967	197.658	346.297	165.629	192.118	31.4707	127.953	52.5934	85.8165	84.255	47.6712	56.626	56.864	68.0735	83.0647	39.3557	209.586	56.8371	36.3001	72.2052	19.3023	50.3008	133.527	161.007
200825_s_at	41.8674	48.3235	32.7963	41.0807	52.866	65.0306	71.6193	40.3286	21.4359	25.3322	27.6504	44.8567	55.6553	47.4683	55.4243	57.945	25.4839	42.0975	38.8221	37.8773	113.78	49.6628	51.887	57.226	55.348	73.8657	63.5728	76.871	63.7242	55.9224	40.4813	56.2097	29.0552	51.3384	44.1046	42.5272	43.3649	25.4829	40.9888	26.3942	18.8189	70.3939	35.284	41.173	62.286	26.0727	30.5731	45.2306	36.7627
200826_at	388.72	343.127	334.783	260.961	217.985	509.373	991.121	989.381	614.794	442.595	264.867	294.75	421.038	251.85	268.735	1459.95	1343.97	785.871	312.846	513.048	1018.84	1122.8	135.845	491.512	1358.28	1118.38	384.206	494.018	438.901	75.9631	166.938	292.79	108.491	41.8448	185.732	66.3861	77.7857	54.2902	36.0636	162.567	55.4323	998.026	196.407	47.5513	123.913	78.8926	97.2505	177.399	115.629
200827_at	136.754	101.665	72.9371	133.009	138.932	87.0977	87.1989	169.672	167.002	74.1685	133.302	119.434	88.7598	160.52	107.135	94.2901	109.35	87.7803	93.5334	110.162	140.993	152.238	152.479	113.993	164.828	129.714	125.893	85.3798	108.156	142.259	121.347	96.4406	139.714	126.366	125.697	111.619	150.418	162.735	113.256	148.072	161.386	126.607	131.799	129.816	117.69	142.15	114.635	92.2779	71.2122
200828_s_at	136.386	154.933	96.2355	164.387	174.896	279.205	217.131	106.895	141.929	194.022	74.4138	166.779	271.649	101.315	377.774	352.331	91.2077	374.808	174.435	203.082	332.851	392.337	176.013	495.805	290.777	413.919	584.142	487.239	565.164	512.612	124.394	409.307	105.32	176.213	264.347	115.2	340.056	92.4561	173.378	160.177	72.7642	397.818	185.018	188.473	158.723	120.562	113.868	99.0608	437.868
200829_x_at	188.749	173.451	106.389	173.152	210.078	302.974	350.902	242.45	393.485	258.946	94.5747	184.367	263.836	129.816	356.696	448.183	173.989	448.892	310.227	234.406	238.591	295.871	147.717	460.398	392.385	485.641	367.264	341.94	503.928	133.054	42.1954	298.04	46.5926	66.2775	153.342	78.9597	95.8061	37.7292	88.6736	161.083	83.8341	268.806	48.3857	84.5118	64.3626	31.7276	34.4489	85.8512	222.549
200830_at	66.656	92.1196	61.3305	84.899	89.4962	186.593	127.593	86.4083	72.5807	57.1307	40.0372	102.072	213.562	70.9182	179.013	168.069	41.825	171.109	107.447	155.243	239.402	317.655	149.182	280.858	229.89	280.205	312.019	293.149	336.286	629.887	386.746	698.749	255.115	463.441	497.562	351.501	648.422	456.591	467.318	323.172	262.919	661.713	276.449	548.716	383.93	86.8272	135.477	366.736	270.773
200831_s_at	138.447	107.437	60.0648	48.9049	62.6292	53.9596	220.357	90.83	216.15	55.6885	30.5272	41.899	41.887	38.9637	61.8571	314.533	150.023	773.432	345.754	598.995	343.857	424.975	934.295	1130.39	454.387	568.921	719.85	908.718	1226.91	240.791	69.0475	190.128	91.8554	71.1407	224.825	102.941	98.5235	71.7902	196.202	177.69	144.099	192.365	979.294	56.4056	120.426	199.615	73.047	179.702	146.422
200832_s_at	634.437	365.588	188.186	151.14	364.901	167.199	1822.97	1636.67	2731.79	97.2453	305.593	347.693	502.47	229.162	415.324	2567.02	2836.07	1977.83	1849.04	1110.37	1220.78	1280.56	194.736	2408.06	2276.19	1584.46	922.964	1265.82	1279.12	549.541	104.52	531.68	168.095	165.556	301.195	523.267	172.341	98.6979	195.986	824.452	332.222	410.025	763.149	41.4032	233.731	684.658	262.987	274.061	973.108
200833_s_at	3223.18	2855.47	4355.72	3485.73	3997.84	2617.8	5732.06	4402.59	4827.82	4417.15	2471.83	3267.99	4443.7	2569.05	4041.94	7989.38	7139.41	4666.31	4183.2	4366.21	4836.2	5412.95	2518.87	8391.13	7594.51	5996.37	5587.96	5680.08	3898.95	1032.19	1050.93	1290.43	1898.86	1123.11	1519.52	2944.28	1318.37	2073.24	1932.04	5297.95	2330.9	1743.93	2015.7	1636.2	1980.62	3430.12	3486.84	2261.91	4888.01
200834_s_at	4204.07	3842.51	3892.7	2800.14	2859.65	2663.15	6082.79	4634.54	4279.16	4998.11	2036.52	2490.87	3411.14	2011.5	2754.85	4857.18	4486.63	4208.1	4101.03	2542.76	3009.43	2800.19	2425.91	4103.79	4938.03	3821.1	2230.34	2720.7	2031.13	906.6	295.403	1395.19	692.761	515.949	1201.65	1415.76	264.147	724.991	658.527	2474.31	1175.21	1476.61	2340.79	271.157	725.779	2242.25	1681.36	1690.77	4368.82
200835_s_at	221.848	382.895	412.41	267.015	201.974	505.115	143.935	161.754	141.76	135.62	321.201	282.316	263.008	272.941	275.503	200.543	228.051	535.026	316.669	178.973	366.084	219.612	249.697	257.765	215.257	325.918	523.706	397.327	173.023	89.359	58.9733	120.07	73.8996	70.2809	48.906	77.4103	75.8272	126.884	51.634	211.665	77.0339	96.5045	96.5167	88.6398	82.5614	57.9099	151.901	195.158	281.137
200836_s_at	103.009	76.7195	43.8807	80.6509	115.892	132.894	65.7774	43.7204	29.994	19.5777	22.1516	53.5471	109.523	39.2226	86.3973	96.659	22.999	112.202	78.3673	91.8567	125.607	87.1335	45.2447	122.878	67.5015	179.626	139.831	174.166	197.586	76.9586	27.115	66.0675	12.4881	36.6545	58.4061	43.8464	98.5306	26.1434	67.6647	48.3975	18.8791	46.9403	58.217	45.153	56.4898	12.8437	51.3041	67.2138	65.7569
200837_at	132.266	138.688	83.5304	161.676	205.502	225.666	156.802	183.542	122.602	56.1258	101.053	178.714	209.925	152.287	315.76	291.763	73.8516	225.988	144.545	220.5	245.935	201.297	201.047	355.942	251.322	534.136	343.473	367.808	221.983	89.526	69.0614	106.24	52.0287	65.9147	67.9968	69.6072	59.5153	42.585	58.1182	109.361	49.8045	103.871	96.4513	63.5246	75.1755	111.27	56.5273	56.5498	575.303
200838_at	770.394	300.592	290.229	281.223	448.975	278.744	167.398	107.951	269.175	150.956	232.969	386.551	338.959	416.579	678.709	106.617	51.4957	231.046	77.9223	106.194	171.052	244.494	43.2599	581.397	386.341	387.107	430.755	279.819	1035.16	3545.7	2146.66	3180.31	2039.99	4571.19	1614.59	4212.61	2239.85	5150.49	2608.98	4433.88	1574.14	1348.56	3276.63	3882.66	2256.04	3766.6	1072.4	1069.55	517.691
200839_s_at	1688.02	1354.03	817.458	1021.1	1302.39	653.186	1139.87	1046.36	1308.8	933.093	771.806	1386.74	1579.6	1484.83	2042.89	628.922	399.319	808.122	648.606	1031.29	776.026	992.385	313.735	2056.25	1820.49	1418.56	1171.59	881.595	2433.41	4375.31	4507.13	3941.48	3464.55	5473.67	2710.25	6381.06	3774.54	6268.67	3448.21	5700.54	3250.35	2328.26	7541.22	4838.37	3539.96	6036.02	2015.71	2747.95	1856.2
200840_at	209.674	323.308	158.639	204.899	135.459	475.646	446.75	260.429	412.51	303.471	212.012	296.793	357.85	200.138	511.002	739.359	237.151	580.158	283.198	621.911	652.636	807.328	965.714	621.051	784.791	733.906	742.683	763.093	682.735	599.694	96.3235	770.969	219.539	356.143	231.455	236.561	302.065	182.675	372.185	380.053	116.016	760.882	216.715	281.371	473.321	210.891	103.658	220.779	403.305
200841_s_at	45.0084	36.5428	29.614	43.8322	49.9771	46.9682	39.7592	23.6475	16.0218	22.4176	24.2114	37.1037	63.809	28.9368	42.3953	60.0011	22.742	61.2047	34.3883	43.2278	31.7412	41.3969	32.8336	55.7712	31.707	54.3852	127.038	68.267	52.1528	28.2832	25.4211	26.1834	21.6277	23.3501	29.7325	28.2895	28.5019	20.8883	24.8954	24.7615	20.4893	54.5986	30.5158	24.3361	25.5582	18.4783	24.4813	36.4451	35.4692
200842_s_at	167.213	94.2564	65.3187	75.3964	103.399	215.427	141.429	98.7205	106.604	107.935	98.9683	130.829	175.611	72.1385	233.668	256.491	88.4757	326.927	118.593	148.551	279.925	237.817	186.281	395.903	285.033	414.26	304.201	425.554	317.353	69.3687	103.498	93.0797	47.4038	41.4414	123.731	88.4819	71.326	72.6393	84.8941	126.7	89.8957	413.121	70.5366	56.9659	48.2171	46.0629	58.5996	65.365	515.287
200843_s_at	183.447	185.184	122.18	147.857	151.489	254.938	413.204	266.463	467.613	278.694	134.248	201.863	379.446	112.292	290.285	413.509	163.363	552.166	157.784	299.077	294.394	413.999	156.557	713.97	430.497	464.6	681.522	789.957	382.035	356.022	89.9588	536.963	156.482	165.649	466.832	308.844	87.8655	76.7322	243.451	200.353	206.786	920.837	881.801	179.081	285.769	159.579	88.7779	400.213	539.286
200844_s_at	617.382	634.645	611.524	552.984	628.39	1000.41	2012.11	1791.26	1813.99	807.568	468.815	637.257	769.454	539.428	847.501	2150.88	1802.25	1174.25	1039.24	2030.88	2072.37	2356.75	236.649	1987.28	2910.38	1992.06	2118.26	1840.21	2745.84	4679.14	4586.77	3220.47	4309.98	4561.54	2285.73	6553.62	3694.7	6150.29	3939.76	5300.39	2194.82	2804.39	6992.73	4290.48	3934.03	6296.31	1485.3	1758.74	769.384
200845_s_at	755.638	972.368	717.341	843.691	1079.33	885.654	2418.1	1963.65	2735.65	790.408	698.923	1068.84	1234.46	1068.37	1415.86	2564.42	2165.99	2086.83	2161.85	2488.52	2041.16	2320.44	369.05	2273.16	2508.7	1851.12	2372.35	2185.97	3164.93	2784.35	2554.69	2303.3	3127.27	3279.02	1718.36	4243.92	2273.81	3990.1	3158.83	4171.21	1902.96	1513.5	3707.44	2883.88	2995.28	3098.34	1791.1	1423.21	1747.08
200846_s_at	168.474	152.106	70.0649	146.051	100.16	220.35	102.49	82.839	69.3794	47.7925	71.8026	150.08	264.389	89.3332	299.157	212.112	36.2555	176.656	90.3608	120.3	184.609	179.629	572.984	379.563	235.33	399.996	246.013	187.82	203.256	140.395	95.7613	169.456	74.1068	146.85	114.098	104.252	119.156	58.5031	119.325	66.9104	70.7971	436.716	86.943	132.614	130.32	586.407	95.395	148.068	437.594
200847_s_at	2630.54	3163.16	4140.08	2826.91	3334.98	2415.58	3735.58	3914.84	3116.82	4001.34	1730.37	2327.98	3269.06	1741.72	2981.07	3215.43	3229.7	2434.99	2525.42	2941.74	3253.65	3166.28	337.415	2724.69	3564.19	2757.48	2877.94	2876.35	3103.01	2119.24	1696.41	1813.43	1859.19	2007.14	1376.39	3165.44	2102.34	3396.06	2188.07	3491.66	1685.06	1744.72	3634.8	2507.49	2094.17	2747.09	1421.32	2117.12	2851.7
200848_at	74.0496	90.814	53.6461	78.2153	74.526	132.21	104.298	52.3424	52.4813	30.1343	38.9824	100.96	183.03	77.7883	187.195	171.459	40.4524	262.493	99.1971	118.575	173.036	212.07	96.7658	314.332	126.092	247.68	383.731	321.561	233.154	113.752	51.4725	127.201	23.8796	80.7787	91.1844	51.2324	79.7961	26.5568	71.6422	53.1498	29.3415	106.497	105.665	48.0482	116.544	22.8328	44.6313	106.255	431.069
200849_s_at	283.175	231.502	147.011	180.932	332.894	320.003	205.507	213.848	338.627	84.9936	135.773	241.203	355.235	171.167	409.995	348.868	122.647	377.048	452.064	350.414	252.472	351.392	84.1093	487.307	337.969	474.361	483.438	438.349	543.998	137.663	71.1212	149.14	58.2554	200.426	213.087	116.453	335.768	78.372	109.667	183.687	82.7494	197.195	355.565	139.432	120.365	29.5456	39.2973	139.6	839.327
200850_s_at	1251.77	684.09	963.331	699.175	944.237	967.901	1907.09	1479.1	2456.93	607.89	800.889	923.672	1339.52	568.299	1193.91	2403.76	1847.34	1504.48	1495.12	1921.04	1377.31	1950.61	1000.03	1785.21	2304.08	2040.59	1659.24	1521.1	1840.23	515.09	186.393	494.387	269.084	481.343	511.825	803.525	368.449	560.204	490.948	1785.92	440.084	434.43	1236.31	365.027	563.504	631.446	355.186	496.232	1760.46
200851_s_at	93.7532	104.242	57.8256	110.597	116.852	144.432	94.3044	60.1941	50.7938	78.1568	32.2725	78.5346	204.656	44.9642	128.091	134.332	36.2133	145.493	80.7345	75.691	61.3569	85.1086	71.2292	204.967	92.9203	225.654	144.952	150.96	116.01	50.4063	26.9715	90.0885	24.7953	42.8981	105.065	63.6877	53.9971	16.0331	50.1108	38.3111	45.1464	149.433	88.281	29.4022	51.2958	22.4443	36.8732	105.606	102.122
200852_x_at	27.3266	29.0544	48.0584	26.7778	21.8776	26.3713	17.91	21.4167	57.2368	17.5607	20.0367	19.9818	21.0238	16.5735	22.8345	27.4379	25.2673	26.3754	26.5984	25.4268	33.648	22.7868	22.114	30.8458	23.8782	28.0182	31.7752	27.5412	25.1954	33.4343	26.5059	44.7298	20.8829	38.4786	34.5301	22.6444	21.9547	24.4334	26.9791	36.9814	23.6568	27.3798	39.4427	23.8079	28.6224	19.5784	26.3447	33.7365	33.0236
200853_at	275.925	185.866	72.87	148.27	150.829	183.58	630.316	469.866	479.146	196.156	98.4623	192.724	272.554	158.125	325.101	1029.78	443.492	727.74	677.279	358.242	353.66	560.297	649.796	1044.99	559.639	541.977	611.005	722.664	760.358	163.785	59.0606	355.045	55.223	35.8474	306.782	111.127	52.6379	50.3001	88.6427	162.129	131.277	436.106	82.3308	39.7689	137.447	40.3103	150.474	154.179	559.86
200854_at	263.77	238.992	160.138	268.932	332.246	355.46	205.82	213.699	193.222	65.4853	231.968	278.159	436.511	172.7	342.337	308.028	142.243	446.578	411.477	324.367	267.566	305.026	45.5835	437.799	257.44	368.108	508.518	485.093	239.575	277.789	77.5524	309.13	96.4363	274.942	182.432	141.369	198.646	75.8027	275.394	160.232	105.428	257.924	1086.6	192.99	181.442	165.158	125.444	170.603	240.997
200855_at	105.213	158.628	132.467	182.585	206.143	295.543	80.8738	77.7086	74.278	62.9598	181.902	249.678	337.074	151.211	419.155	154.393	58.3829	256.276	121.648	185.976	170.817	152.762	107.335	342.952	171.92	358.674	403.138	346.56	185.895	188.01	64.8858	220.609	77.6495	340.349	202.647	74.0228	138.047	76.468	187.79	86.4617	59.3743	211.413	64.8612	313.75	192.782	141.986	108.573	141.726	97.1766
200856_x_at	233.795	281.918	188.549	292.656	410.192	437.635	213.101	315.406	140.565	140.961	204.387	306.946	414.376	244.68	428.354	289.184	176.501	344.733	422.22	310.728	331.671	382.151	368.019	466.973	389.096	394.647	597.433	455.94	564.365	385.425	234.503	406.432	157.255	362.717	234.128	176.159	497.287	139.439	251.168	231.39	166.677	312.014	95.2226	253.155	251.818	63.1458	219.685	157.739	117.485
200857_s_at	83.7623	88.848	48.2924	125.294	85.5607	81.9565	66.1053	29.1361	62.3583	49.899	47.6922	76.4618	105.964	51.8348	130.483	43.5033	19.6665	62.2547	73.6348	98.8285	74.9562	49.3463	41.4197	92.6992	54.8508	71.6548	104.037	81.753	58.3368	44.5355	29.7085	65.58	35.5518	47.1695	41.6557	33.5142	30.9064	49.7097	28.761	38.001	30.9991	51.5219	88.8638	42.2422	58.812	30.1841	24.8723	45.026	39.4547
200858_s_at	750.156	898.728	1053.08	665.421	475.262	1477.51	2255.27	1796.04	1587.36	1203.58	773.731	693.636	844.973	647.143	547.134	2734.14	2879.54	1588.84	849.446	647.8	1376.71	1537.97	183.937	1132.68	2938.9	1568.95	632.642	844.927	952.947	254.549	189.894	486.218	178.846	81.5132	191.168	60.7362	160.999	52.4057	90.8425	248.713	70.0899	924.164	188.53	66.4227	146.416	860.466	334.589	174.365	879.038
200859_x_at	47.2945	69.6237	104.904	118.97	134.345	148.554	114.852	97.948	50.1621	39.2676	45.9292	118.045	220.301	74.5382	257.458	150.913	53.3896	105.903	97.3729	88.6444	150.577	161.179	95.3646	618.483	190.923	538.202	451.568	294.051	344.315	59.086	62.1151	75.672	65.6863	63.164	51.3026	53.2561	57.9882	61.7908	60.6679	74.3316	51.4237	68.9976	133.161	78.9076	105.757	63.3739	138.589	125.362	141.867
200860_s_at	153.999	181.366	87.0531	166.264	122.649	284.974	165.943	101.091	94.8992	40.9289	79.1711	159.855	315.394	105.416	248.07	277.657	71.2937	378.492	302.049	170.159	189.97	184.114	45.1959	312.1	222.737	369.438	198.586	268.181	142.542	91.0797	37.0428	222.76	17.5467	23.6437	112.115	34.8516	25.5756	23.6368	38.9832	49.0854	62.2437	255.383	21.5937	48.3451	33.5915	12.131	35.8987	99.4355	422.964
200861_at	337.399	275.251	223.774	207.689	203.234	497.683	404.87	334.93	456.271	103.106	164.598	248.856	575.819	144.117	280.781	650	287.754	705.694	412.899	363.919	244.264	308.114	71.9508	519.392	471.924	388.997	303.056	316.887	462.23	63.707	37.7028	375.121	38.621	22.9645	158.077	56.0144	34.8112	20.8801	53.9804	143.442	70.4354	199.382	47.4573	24.169	57.1859	18.8449	65.4881	86.0542	418.014
200862_at	399.031	227.101	135.967	179.651	250.19	227.333	777.809	962.064	1312.59	222.274	182.019	281.392	337.58	249.445	409.049	1148.66	775.028	1242.98	632.951	1006.16	1088.4	830.351	906.252	1334	570.652	983.137	752.946	870.814	751.852	204.14	259.848	296.147	181.738	131.166	522.462	127.074	73.8278	73.3854	338.452	467.485	332.702	698.457	3305.3	141.587	143.297	197.62	261.32	235.548	636.379
200863_s_at	560.657	275.359	593.685	780.416	524.281	1142.74	522.309	465.173	597.994	388.385	649.807	626.437	666.355	451.439	787.808	1033.52	600.379	1292.29	740.129	679.408	821.119	1134.22	165.977	1731.74	1372.95	1398.08	1379.61	1308.82	1955.1	554.155	250.272	1369.2	448.938	410.787	607.092	276.349	540.332	262.064	402.668	384.739	168.175	891.517	618.121	386.239	414.917	211.453	781.917	300.277	564.324
200864_s_at	114.276	200.004	160.921	224.307	205.925	298.499	215.248	226.972	169.29	140.35	151.966	274.075	526.091	205.137	344.054	413.799	216.312	989.62	371.917	191.316	336.316	522.191	121.147	1242.82	460.261	398.851	1160.85	653.585	926.561	253.768	63.7057	189.21	34.2723	98.8635	235.261	80.9951	135.577	34.8567	233.944	73.178	68.0901	84.009	96.5696	86.8406	227.519	30.0886	256.324	195.408	596.375
200865_at	70.4181	49.1926	63.4363	64.2179	71.0923	52.3508	56.1011	65.1569	26.4154	58.0812	62.4935	55.7638	49.5894	61.3294	50.8764	61.735	52.5116	36.7896	36.101	59.8162	55.0152	67.4969	47.3861	38.5525	101.895	47.7497	35.4383	45.2198	52.8828	47.8636	53.1488	39.9547	55.9737	43.926	42.1602	63.4301	47.8778	83.4029	49.2009	40.9989	84.3891	46.5592	51.92	58.3202	52.7088	87.2684	43.1333	39.9173	40.0606
200866_s_at	318.832	370.227	214.119	382.085	479.654	489.954	169.158	106.184	94.3139	114.647	381.572	518.302	484.507	371.836	1049.79	135.582	32.8542	110.049	234.772	356.907	290.503	250.616	441.719	600.743	506.41	1090.67	622.398	440.15	918.823	1065.94	711.931	986.397	647.554	1073.09	332.119	1609.65	1169.92	1466.05	801.929	1209.18	485.3	299.182	519.198	1964.27	706.664	1041.6	308.455	374.035	462.025
200867_at	298.402	231.816	182.052	279.62	230.132	379.886	383.008	270.183	384.712	276.971	260.994	249.751	408.977	124.256	293.35	350.404	183.266	461.978	198.53	347.837	245.213	291.277	129.803	598.419	371.73	508.139	342.071	326.824	308.369	88.191	75.3401	172.288	77.0829	58.5646	204.234	60.5923	78.0393	93.6857	56.094	113.519	67.8501	180.771	244.836	30.377	100.934	37.5178	148.395	104.156	562.054
200868_s_at	84.303	106.558	60.1865	74.1118	78.345	150.471	69.6074	54.8685	64.2421	105.64	45.7013	91.6962	96.978	114.045	139.871	86.2573	48.149	109.41	33.8615	39.815	105.107	73.988	37.9976	116.493	68.8559	98.8136	101.327	136.113	78.2849	86.9772	38.3365	54.8411	29.575	30.7144	61.9788	39.5964	37.5574	43.0444	46.462	40.6799	33.9041	111.88	38.4317	35.6781	102.776	23.2282	46.7904	57.7682	197.812
200869_at	2846.56	2379.41	2963.44	1679.74	1613.46	2045.14	3939.1	3283.65	3182.22	2696.51	1245.46	1477.41	2169.57	1222.03	1442.86	4288.63	3557.82	3357.24	2589.14	2107.06	2680.06	2744.92	210.679	2696.09	4358.22	2909.27	1765.63	2039.5	2042.25	665.644	153.073	611.777	393.102	251.347	415.781	855.046	218.054	375.36	453.142	1620.2	410.803	795.134	1896.14	229.055	360.486	1063.37	753.577	963.056	2569.52
200870_at	772.71	861.303	676.581	531.742	833.221	960.284	1456.4	1484.94	1661.46	1190.14	883.195	886.654	1029.37	728.268	933.464	1465.52	1084.4	920.719	1072.59	1241.48	1387.67	1274.72	580.009	993.738	1532.78	957.996	1352.84	1140.88	1887.32	814.094	435.879	786.214	761.077	634.593	486.802	963.859	674.796	891.471	599.359	1529.55	459.793	497.903	1808.71	558.084	611.768	1459.41	598.438	301.733	1275.66
200871_s_at	1976.58	1835.17	1998.48	1717.03	2305.85	1385.4	2461.5	1622.42	1646.35	1512.65	1790.72	2480.79	2877.78	1956.57	3756.48	1440.58	841.489	1074.2	1651.2	2144.51	1276.09	2007.78	1244.97	4131.45	4799.82	4258.33	3326.9	2358.72	4268.54	2911.27	2315.55	3191.54	2251.95	3756.18	1658.53	5592.59	3193.76	8034.73	2686.32	5037.38	2499.02	1896.58	2454.41	5309.96	3121.04	3103.45	1665.04	1936.22	3469.14
200872_at	1479.31	1558.93	711.78	577.847	981.755	401.638	464.767	1351.48	816.906	402.964	681.976	864.825	792.535	677.66	1527.26	236.942	111.338	264.333	540.917	768.17	379.324	532.98	259.5	200.842	310.806	1020.59	355.777	183.886	157.298	335.327	1039.48	338.013	144.904	2008.4	101.307	274.118	1672.56	358.141	220.254	655.096	112.391	293.483	1212.99	446.509	328.896	352.137	275.681	282.853	1283.75
200873_s_at	582.947	552.251	464.571	378.054	355.348	637.722	1412.62	948.036	1281.71	555.925	474.193	571.1	677.185	539.527	614.005	1537.77	1152.66	1356.51	992.779	770.915	701.165	913.576	253.56	1381.81	1325.07	1036.32	1151.9	919.173	1616.58	419.799	95.0524	619.249	127.656	161.32	499.991	125.277	93.8809	147.76	201.495	407.147	172.772	479.545	2416.1	97.4021	250.427	424.13	402.442	151.885	879.615
200874_s_at	24.2582	24.8361	22.4325	23.4608	22.194	22.9378	28.2878	20.0829	33.2652	17.1128	15.941	20.8291	27.8278	16.4672	25.7671	38.4088	18.9992	38.678	31.2921	32.6354	36.6024	54.7718	25.2764	34.8052	49.3012	45.4134	43.1685	41.2252	34.9024	28.6986	25.6456	31.7835	21.2569	22.7382	34.263	26.9456	21.6824	22.5678	23.7643	28.9186	21.8117	31.954	23.4473	25.1641	22.63	17.4681	23.6016	21.6805	36.8097
200875_s_at	428.663	609.775	547.018	339.879	338.665	724.99	1678.8	1331.32	1852.15	704.153	916.603	609.771	952.475	473.93	334.133	2433.92	1683.65	1291.2	1277.4	873.163	1222.04	1024.83	156.271	705.218	1614.3	1220.69	673.064	794.095	858.613	133.56	62.545	144.103	64.0101	17.0428	280.114	100.075	55.4682	67.9985	50.218	368.875	126.282	472.046	88.2283	45.9019	97.3851	36.1095	78.8184	266.492	233.855
200876_s_at	138.634	97.9556	73.4733	74.5189	105.02	293.224	265.574	191.807	202.393	167.476	54.7684	143.048	341.616	76.2292	293.588	322.108	64.3346	324.45	241.528	205.525	183.953	191.152	55.8475	503.733	305.392	448.718	240.355	241.954	155.656	178.983	46.8622	366.195	29.0434	26.9445	218.139	61.4608	57.1978	24.6632	39.8031	82.9031	77.4946	374.295	44.9821	33.9793	90.1227	15.2158	145.041	182.37	278.441
200877_at	356.57	224.468	129.263	182.651	235.061	198.673	430.135	366.41	491.849	156.347	116.03	193.828	355.887	139.789	244.517	547.18	247.337	661.387	232.623	408.278	288.097	338.898	81.2768	571.877	508.208	573.395	493.82	383.636	832.04	161.674	25.2796	243.214	24.8048	39.0069	136.54	48.5475	26.0278	15.9067	47.841	150.797	34.3362	343.793	641.779	24.1781	47.209	17.7168	66.9577	53.04	971.874
200878_at	41.265	40.1156	53.6123	42.8968	52.6881	39.3433	81.0537	37.6693	25.9837	37.8448	50.3828	68.3223	173.464	54.7961	45.4995	67.265	42.6544	38.7602	83.344	44.6446	42.5482	78.6738	40.2582	39.3363	85.4932	45.7913	53.8294	43.7054	51.2779	27.1423	35.2428	25.1861	34.1228	35.9577	36.3859	48.5978	35.2039	94.1716	35.0149	45.1584	28.8885	38.0804	38.914	38.5714	28.2898	41.0449	28.9751	33.5667	31.8449
200879_s_at	84.976	61.5334	66.7162	82.0518	62.6112	59.8764	73.9288	86.8634	97.4968	77.8652	132.986	77.9247	77.8123	91.2349	39.0558	54.9319	161.014	44.9896	48.5576	182.073	68.7755	71.4414	55.6816	49.5451	222.6	54.5811	39.7004	42.7215	50.0145	41.5211	64.3666	51.3112	72.8319	44.955	45.0205	72.3479	55.9077	148.563	64.7846	193.654	91.2925	55.5817	44.2811	66.9286	58.5881	68.8577	44.2763	45.7684	46.3609
200880_at	125.089	126.328	68.9341	52.8633	113.162	67.2175	54.0008	38.2783	43.6428	40.1119	32.104	74.6088	110.874	88.6833	98.1588	110.488	41.7113	157.416	60.8111	141.913	152.725	150.105	50.4732	168.244	119.972	126.584	237.608	158.091	91.6715	226.095	95.5646	158.577	152.2	210.078	129.124	153.45	258.418	49.3126	240.16	139.05	55.2937	170.289	136.925	89.5235	166.358	38.3001	40.8985	74.5291	66.627
200881_s_at	560.59	503.234	496.746	274.528	415.938	353.719	357.181	442.73	622.89	371.508	415.572	387.29	432.169	259.812	482.153	809.403	503.397	727.456	556.151	699.438	573.904	778.732	156.078	772.749	885.13	579.667	990.985	818.447	1289.63	971.078	569.707	623.129	872.666	754.462	572.57	1647.62	803.171	1389.69	1073.13	1188.13	458.456	498.128	833.7	806.945	1030.37	1466.39	305.722	275.521	297.173
200882_s_at	400.177	398.858	355.876	262.56	330.571	332.665	567.33	216.596	499.867	191.603	232.14	294.298	495.534	152.069	428.832	556.617	232.505	363.827	495.498	863.416	544.996	580.363	93.568	686.014	564.079	600.568	884.421	699.375	894.194	952.679	617.276	1015.73	677.694	1029.81	306.861	1433.9	861.299	2039.19	953.745	2026.6	535.902	475.901	1235.91	1471.48	700.052	1809.44	267.271	352.266	557.602
200883_at	84.4297	120.513	80.1019	64.866	83.0088	241.885	246.336	98.5715	111.731	33.3115	48.6886	112.64	230.187	92.1845	155.812	294.925	101.532	400.569	136.782	262.747	323.22	342.688	113.058	267.945	294.356	322.286	392.531	431.388	246.055	347.973	98.9376	344.485	111.016	240.32	186.315	154.043	166.934	122.232	224.659	185.702	69.9253	334.388	105.15	136.471	151.152	60.5078	39.6468	175.104	193.357
200884_at	31.221	25.782	31.1573	27.3898	27.2279	26.3049	19.6944	22.3117	26.8926	30.6723	25.9193	23.7617	28.539	19.1237	22.536	30.1744	22.3339	26.3139	25.3998	24.9082	23.6473	29.0463	25.4087	28.4263	22.9051	31.256	37.431	32.9214	32.2616	23.1664	25.8354	26.76	26.7987	28.5134	24.2401	24.2682	32.5365	22.9552	26.0406	24.3302	20.1736	24.8876	34.2763	24.6926	28.4836	24.1649	28.5478	32.871	36.438
200885_at	22.9727	25.4605	25.5115	29.7434	27.8648	34.1543	17.7319	19.3486	9.44337	21.4865	19.4652	23.2014	27.736	19.7749	27.1418	18.2835	16.3534	24.4651	19.8665	18.9469	18.0488	17.6459	18.7367	24.6227	28.8008	31.1344	32.7719	26.4625	27.0551	19.3632	19.9192	21.7856	17.4255	16.9702	17.3037	16.5328	17.6922	17.1179	17.0344	17.2497	16.164	19.4922	19.2524	18.2998	18.2598	18.1628	22.2937	23.0737	22.3404
200886_s_at	462.429	281.005	216.925	238.33	477.908	371.808	797.26	558.879	771.574	278.335	189.252	421.854	761.855	270.28	812.681	1133.48	458.419	840.327	718.649	507.336	535.752	810.43	2968.5	1732.44	1387.52	1060.57	986.478	1430.04	905.334	128.614	38.9102	59.9564	22.4883	24.5605	92.2312	76.4724	73.4239	19.0683	99.1382	242.019	64.1946	146.466	66.2636	24.077	160.755	25.8729	75.8548	193.675	844.158
200887_s_at	208.725	256.336	126.041	221.606	237.659	578.575	277.221	397.228	339.007	871.93	295.358	340.377	523.779	146.033	594.143	338.02	103.018	485.161	348.17	321.662	204.988	224.369	218.683	509.551	383.626	464.839	425.568	410.465	481.952	156.359	33.9861	156.448	53.0219	52.3691	93.2829	68.8224	58.3127	22.1725	67.0509	129.094	34.2756	196.379	160.229	44.7047	71.7057	20.7707	136.569	171.355	337.902
200888_s_at	7551.44	6366.81	7370.58	5696.31	6400.2	4495.85	10114.2	7487.99	6083.72	6829.62	3218.02	4770.81	7585.77	3523	6023.76	7975.2	8235.5	6887.92	6207	5532.24	6871.21	6214.33	3101.46	7064.19	7018.28	6627.11	5789.28	6654.32	4332.16	3302.77	1654.48	3493.16	3200.19	2964.29	3133.8	4097.66	2457.71	4759.11	3487.43	6389.43	4178.19	4341.02	4836.05	3162.98	3586.76	4981.47	4103.92	5108.55	7580.25
200889_s_at	166.524	170.407	82.6746	186.19	184.038	129.067	158.812	125.195	47.4369	46.0442	120.185	163.737	156.265	146.469	261.295	192.961	62.899	218.38	118.989	109.811	139.572	138.454	191.2	413.072	190.57	236.539	390.356	502.523	275.688	52.5357	42.8657	80.7267	60.3935	39.3579	89.7057	65.4321	66.8883	38.4126	71.808	49.9422	46.8579	99.2463	107.122	57.5098	63.6334	60.0806	46.1498	72.6174	166.942
200890_s_at	413.64	265.771	173.028	200.303	227.843	263.308	403.901	394.341	465.596	162.201	186.507	291.502	311.872	332.916	372.873	402.568	227.798	611.438	450.762	213.225	231.222	329.192	147.365	1131.17	411.232	493.712	650.289	578.691	562.276	48.7795	37.0509	87.9393	28.2257	20.6223	159.805	50.2277	35.6554	33.0597	47.2948	102.205	35.1427	145.493	45.5553	26.9842	59.7052	21.5504	71.5928	119.425	1042.16
200891_s_at	2877.5	1957.6	2351.32	1873.2	2360.18	1286.81	4343.18	3974.79	3593.24	2453.83	1439.06	1983.54	2904.65	1605.62	2306.5	4108.75	4528.46	2842.65	2820.59	2024.98	2466.28	2364.31	1765.03	3518.49	3716.09	2621.38	2291.25	2909.75	1950.75	507.097	290.312	623.566	472.737	193.487	712.144	878.581	159.406	265.18	581.443	2189.51	803.35	711.836	2882.89	308.554	671.721	923.62	1352.04	854.665	3373.06
200892_s_at	245.998	182.738	144.099	179.414	134.717	469.664	326.536	352.53	426.391	376.878	185.039	225.843	393.122	127.508	280.476	363.339	150.323	363.886	336.745	230.65	248.042	259.543	40.7231	400.36	213.025	291.315	374.29	449.066	493.806	244.08	49.8209	285.635	41.184	81.2153	247.573	208.509	82.3313	73.9726	80.8658	134.105	125.598	237.276	480.101	136.774	74.0871	80.0722	142.848	113.07	467.287
200893_at	1788.07	1239.8	1598.44	926.155	1351.31	1281.54	2204.59	2410.01	2718.94	1647.13	1020.43	1143.95	1653.67	840.022	1208.11	3208.8	2750.73	2389.28	1882.88	1962.27	1760.4	2055.74	365.351	2698.2	2781.18	1900.8	2265.05	2215.72	2547.63	1170.57	585.127	1026.76	739.476	754.428	1060.87	1435.27	805.057	1369.89	962.703	1996.59	933.561	989.601	1052.32	729.161	935.826	1270.58	1015.58	726.053	1512.97
200894_s_at	35.3683	34.5109	25.8898	28.8556	34.9376	32.4825	30.0974	22.1596	25.6845	10.6726	19.1548	22.5193	27.0723	16.9286	29.2951	82.9765	22.6208	63.5526	32.929	71.1553	67.3443	78.431	42.1086	72.13	70.82	48.3197	117.192	115.252	95.0332	29.7329	38.4286	36.7753	23.6638	20.7149	28.2497	36.1576	42.1148	24.8444	33.0186	40.7744	20.5515	42.0551	34.4481	29.3212	26.884	19.722	14.7818	28.8833	52.3299
200895_s_at	253.982	166.703	58.902	65.5649	126.037	104.75	116.009	61.6971	102.575	9.00107	32.7582	51.5496	68.0983	67.0393	47.2187	421.97	170.999	362.963	170.288	275.999	210.68	254.453	378.851	309.349	477.665	281.894	264.627	300.403	558.833	81.4659	16.8641	166.01	26.9467	29.1258	78.9557	46.7801	105.49	8.02765	65.8495	116.288	38.7364	139.65	81.0232	54.0071	45.5787	76.0106	36.7269	36.9567	192.508
200896_x_at	519.79	379.416	259.487	311.846	595.579	484.265	1173.36	1260.93	1299.23	190.315	334.8	598.161	837.241	470.224	971.254	1637.75	654.15	1098.09	1151.04	1741.75	1595.81	1831.17	3985.19	2085.06	3027.53	1893.85	2413.34	2454.79	2993.82	4179.72	3293.85	3740.55	4690.02	4184.34	2872.07	7163.22	2910.31	6908.82	4206.55	6567.24	3073.32	3216.39	7382.52	4495.21	3747.08	7885.61	2094.14	2364.52	1344.31
200897_s_at	38.4984	61.5224	33.792	39.1792	47.2323	47.1261	30.2386	41.003	12.6958	12.1417	29.4666	49.3368	92.4938	30.1368	72.1348	31.1195	24.9334	32.1075	51.1746	43.716	23.1141	23.8872	43.343	22.143	33.9162	59.8869	25.6634	28.1058	33.5734	60.238	30.6386	37.2263	27.0617	45.2578	50.8392	29.7383	25.6526	14.3846	32.0173	42.51	18.5374	62.584	26.1051	23.1368	28.353	21.4502	28.3343	31.4539	33.0334
200898_s_at	119.583	136.962	178.927	331.64	179.912	506.143	118.861	49.4339	46.8296	72.8869	153.464	178.996	265.721	131.435	191.525	84.0601	35.7204	124.025	121.163	73.2154	96.1911	63.3319	28.1393	161.072	67.9158	91.4201	194.17	168.602	90.6111	123.094	54.9581	152.701	53.0898	81.1569	260.943	90.0005	222.663	48.825	121.626	50.0921	109.609	136.042	313.159	139.379	90.5895	27.4197	240.805	217.5	238.892
200899_s_at	1969.78	1796.53	3232.82	2133.7	2315.47	2342.74	2345.04	1850.9	2854.17	1758.38	1533.8	1634.55	3006.58	847.345	1826.81	1927.6	2010.64	1809.83	1748.15	2017.81	1614.2	1785.1	1207.54	2002.34	2594.76	1792.91	2047.17	2035.17	2114.83	1602.34	1266.79	1409.56	1726.26	1719.29	1537.75	2128.84	1623.4	2538.06	2014.57	2681.34	1909.47	1234.06	1863.73	1626.17	1874.74	1674.74	1880.13	1452.91	2054.3
200900_s_at	53.5284	75.5396	33.4221	81.3349	62.9717	82.0231	88.3449	21.0393	28.5014	28.7323	32.5322	69.715	143.703	42.8198	118	38.2603	22.5913	53.5781	27.9139	50.1505	39.5998	62.7877	62.4241	207.364	33.3006	89.5232	172.984	130.07	65.8254	28.5697	20.512	17.9425	27.8563	14.0622	45.7403	17.9667	15.4838	36.6841	15.8507	20.6608	20.863	35.0473	14.5093	23.0078	17.0524	13.5256	11.31	19.0544	205.985
200901_s_at	806.498	968.395	641.29	708.522	865.094	1010.82	1366.37	966.413	1744.08	399.357	1151.74	1266.76	1640.56	1148.05	1187.07	1373.66	1325.13	1578.51	1448.82	1093.84	748.993	906.272	242.071	2167.85	1303.4	1320.04	1165.1	1154.99	1424.48	286.465	105.219	385.026	59.9165	76.2687	313.587	104.739	219.324	68.7239	186.944	553.264	206.943	328.015	127.68	68.1585	315.656	28.3704	270.698	353.548	1652.3
200902_at	969.49	764.963	1211.5	788.069	892.569	1339.36	1221.3	1142.51	1675.72	801.71	770.505	809.114	1226.42	543.022	835.228	1010.29	788.358	922.019	1085.05	823.361	646.662	865.556	919.867	1204.33	1212.34	953.827	1044.23	1125.18	1241.09	388.235	119.439	482.728	134.87	364.571	468.316	151.55	157.518	236.774	332.069	522.837	212.605	430.791	836.282	448.361	296.718	280.522	353.453	389.519	1263.26
200903_s_at	67.3107	60.6036	25.2966	38.0084	30.9237	46.331	75.8087	37.7498	33.5982	14.2197	14.6391	29.3747	59.2178	21.6788	39.6181	177.469	44.6138	92.0665	50.1065	65.6169	224.56	173.049	44.4087	108.485	96.5549	165.998	123.515	181.278	73.138	23.4104	25.4497	24.4459	18.3576	18.0999	16.0311	25.7135	24.7398	11.2764	22.5623	69.4062	14.1382	54.3493	26.3007	22.2258	22.6921	15.5494	17.9743	33.4226	50.7235
200904_at	994.453	813.767	1870.14	1602.82	1543.1	2802.57	878.067	642.164	1544.1	3809.04	2506.24	1880.79	1909.27	1198.24	2182.37	593.672	214.229	1618.72	1085.42	1988.27	525.8	483.149	518.677	2412.88	3470.21	2992.57	1508.34	478.526	1056.24	123.479	136.415	345.659	354.38	116.355	189.444	203.236	327.092	103.984	376.653	513.508	559.89	166.857	520.241	649.267	366.798	490.483	1710.93	648.034	1661
200905_x_at	506.702	627.324	1122.99	1246.43	1037.07	1650.37	456.317	500.588	562.617	2084.7	1354.08	1223.87	1264.57	882.819	1484.18	360.159	140.87	1080.09	923.629	679.004	429.274	272.944	173.245	1611.83	1186.72	1210.67	1143.94	473.608	581.06	107.724	90.7161	154.703	129.704	83.4193	126.261	172.757	110.635	179.733	211.291	281.148	178.279	87.779	233.556	87.225	224.638	89.1957	1004.2	498.418	1332.09
200906_s_at	46.4587	49.3048	33.0678	40.0498	38.838	35.2569	40.4546	39.8091	61.2909	38.315	43.1264	47.3061	61.5397	39.6883	47.5451	42.5811	39.4705	44.2403	45.9546	33.7109	40.1503	33.4871	32.996	31.2397	31.9259	38.9885	37.4291	37.9438	32.8807	35.7829	37.5255	37.463	40.7135	48.3075	37.0909	42.124	43.4512	45.5951	37.8585	42.0478	49.1686	35.6256	39.3817	30.4348	42.4337	30.2831	35.9318	32.7235	62.5821
200907_s_at	72.0454	45.4392	49.7429	59.3592	64.9663	62.3801	39.4241	41.6337	38.983	18.022	42.3783	60.4732	95.4618	42.7205	77.3824	31.8832	35.5286	55.0669	50.8919	44.6342	26.017	25.2208	27.1242	53.5474	34.4098	70.1331	48.2294	31.1413	43.1234	52.1833	34.6846	40.7157	31.2859	31.8679	75.6734	31.5404	33.392	29.2256	54.5499	47.3666	29.2701	34.1014	29.837	32.5161	33.9653	23.9685	36.3337	59.3405	29.1191
200908_s_at	1998.02	1446.86	1976.86	1199.34	1206.89	2289.8	3458.75	2865.85	3025.7	3194.66	1154.44	1302.13	1786.89	1093.12	1274.93	2924.76	3103.18	2135.8	1614.31	1492.09	2551.48	2708.85	1935.24	1816.84	3486.32	2327.49	1507.97	2183.76	2530.88	1001.78	848.866	1028.97	1294.51	1213.59	1303.4	1788.48	648.94	780.259	1083.55	1409.87	645.289	1521.53	3294.21	460.65	1203.26	1675.81	1191.27	1455.12	2719.47
200909_s_at	4968.73	4076.72	4722.19	3050.51	2576.56	4041.35	6184.76	5003.05	3867.51	5347.54	2134.09	2559.01	3274.59	2276.23	2695.88	5187.48	4691.36	4059.14	2858.18	2724.6	5208.33	4480.63	2846.4	3913.1	5385.5	4499.87	3088.43	4257.55	3618.87	2169.79	1576.16	2322.69	2310.88	2584.35	2900.08	3732.67	1387.19	1929.29	2108.6	2841.81	1494.33	3131.46	4549.33	1012.76	2500.5	2905.25	2169.32	2940.08	4461.79
200910_at	201.746	179.581	155.218	156.43	174.2	162.538	389.578	333.708	378.046	60.5153	105.665	171.707	392.261	108.564	193.18	678.005	277.442	472.386	352.391	332.147	394.873	517.398	143.586	416.389	473.664	523.163	383.598	271.773	427.409	143.854	28.9666	528.195	31.9512	41.59	95.1274	73.9385	43.8623	32.6267	58.2649	133.222	65.4222	497.188	71.8993	29.9177	58.9829	13.9527	41.3952	125.488	480.444
200911_s_at	206.296	286.802	186.006	408.236	399.119	491.963	373.537	166.662	236.873	229.924	567.169	673.957	792.632	649.517	706.571	285.453	77.7752	448.426	253.624	235.378	161.581	273.535	119.855	1118.91	556.134	756.932	652.085	393.237	576.247	294.112	47.8936	691.14	46.1981	65.1306	367.893	108.049	95.0324	32.4531	69.3234	117.265	139.05	409.693	100.131	46.3041	76.4345	16.6053	106.044	211.313	701.189
200912_s_at	2510.21	2431.02	2767.6	2487.27	2007.56	2294.32	2828.75	2775.6	3175.71	2949.06	1983.02	1994.85	3060.02	1394.05	1872.04	3215.01	3099.57	2671.69	2507.6	2496.37	2752.69	2387.33	621.286	2550.56	3171.23	2128.91	2674.61	2909.3	2713.76	1400.54	981.959	1371.58	1412.17	1223	1357.09	1983.32	1153.51	2543.31	1563.38	2870.16	1497.54	1246.26	3132.25	1572.3	1498.17	2332.66	1519.36	1266.76	2804.87
200913_at	51.1136	50.3922	29.8866	46.1603	52.4774	62.6041	63.481	35.05	23.6086	16.3296	16.8693	39.21	91.2806	24.6086	62.3774	94.3532	20.4778	62.2907	40.4349	45.5093	60.0957	61.8252	53.9886	99.8522	53.505	96.3382	95.7598	97.5166	90.991	20.6354	32.0583	65.6841	26.305	17.897	63.2575	32.8341	26.3684	15.1739	20.7476	33.4981	25.1606	96.686	27.0247	29.5438	16.5577	17.955	20.8045	19.476	61.7533
200914_x_at	137.49	246.585	79.8618	206.539	243.297	205.342	159.214	117.698	88.9789	96.4434	125.239	204.549	232.844	214.114	280.377	170.018	94.3994	170.894	252.608	148.486	189.991	155.226	89.9379	144.261	130.614	179.657	158.805	177.873	202.365	99.8031	76.568	131.545	102.309	156.547	76.6591	77.1821	143.159	55.5752	40.2892	87.5533	51.3212	123.203	192.496	72.2286	147.951	110.809	61.3391	69.9942	317.807
200915_x_at	291.763	270.877	150.352	196.485	194.209	424.323	362.822	371.635	441.909	288.597	158.108	255.113	407.473	192.827	340.963	387.652	201.896	485.255	473.234	312.738	218.687	278.838	123.958	393.219	310.447	299.115	381.41	379.647	325.299	113.985	65.1912	141.199	52.3735	119.548	84.8881	82.4103	95.7588	44.8562	72.3591	83.2614	81.9391	168.235	99.9908	64.9621	160.56	65.8082	108.94	96.6062	577.826
200916_at	310.757	277.536	244.216	431.083	311.134	749.891	521.021	587.503	400.415	97.3955	308.919	475.887	681.775	445.934	546.084	1318.46	518.594	899.143	471.111	685.471	1005.12	1072.67	227.995	997.939	1405.68	1316.28	1019.99	598.642	517.786	78.3974	93.9361	87.8117	70.8732	65.9175	95.5925	91.353	139.955	38.3623	71.2566	247.588	55.4956	170.669	137.657	82.1784	129.179	55.1191	188.458	107.825	632.711
200917_s_at	39.7654	45.7146	33.6188	43.0816	43.8239	49.5756	31.0578	37.1266	16.4504	24.8589	32.8163	41.0924	42.8675	40.0819	50.5682	33.695	29.7473	40.0633	36.6807	34.058	34.2608	33.289	52.386	33.7204	30.1255	42.0639	46.2831	34.7192	42.2499	39.6561	33.5234	34.8584	29.2643	38.2249	34.8778	38.0344	35.7412	29.9739	31.5984	31.1884	27.6066	34.4076	36.8083	38.2993	35.8891	31.2536	43.4677	38.6673	42.3724
200918_s_at	67.8593	80.6155	43.1254	50.8733	65.2065	132.016	116.253	85.2952	53.6283	31.0181	31.4218	80.1431	229.945	53.5072	106.708	144.575	31.914	69.2544	50.8089	74.3395	141.758	86.6286	46.8068	172.323	133.17	233.934	110.772	168.773	69.067	27.2264	27.5973	37.287	18.3557	21.5674	32.2787	36.2156	26.523	16.2387	24.1277	33.3407	18.9257	171.93	28.7267	28.1279	19.0413	19.9601	17.5022	53.1258	113.73
200919_at	35.8166	33.4824	38.2223	33.5201	35.0616	27.5626	22.4591	22.7664	15.1353	20.8571	17.3427	22.0861	18.5454	19.1617	38.6092	27.1284	18.1943	22.7715	27.8416	22.0334	23.0822	23.0214	24.6842	30.5831	34.76	29.4681	23.0223	27.2295	26.4319	24.3367	22.5768	16.3349	20.2994	24.6638	19.3904	18.5095	21.1028	16.2286	19.1988	30.5511	21.8107	33.2011	19.6417	19.9233	13.4383	20.4437	21.3351	19.5868	29.1868
200920_s_at	272.391	339.838	587.075	361.01	500.485	616.499	46.5771	60.102	89.7353	589.942	579.673	358.42	344.506	152.836	540.712	60.8084	39.3501	90.9689	263.554	153.024	106.007	82.4569	3048.91	176.114	184.831	255.06	153.987	202.005	210.773	213.743	76.4798	122.884	51.2042	132.915	104.903	99.3881	183.702	122.43	88.9604	108.581	136.03	109.086	80.2193	68.775	117.566	78.7081	115.898	161.219	285.859
200921_s_at	1596.69	1427.43	3105.52	2125.45	2123.04	2494.85	1210.32	1147.67	1178.65	2739.16	1713.55	1625.6	2305.67	875.855	2018.02	379.238	448.153	623.759	588.671	887.803	654.06	514.386	346.42	1174.72	2173.51	1348.83	784.449	1403.58	1043.85	769.58	668.929	709.04	685.217	983.187	447.017	1094.88	929.058	1397.7	704.992	843.201	701.01	326.386	2255.59	865.287	802.382	1105.47	1410.06	551.641	2624.91
200922_at	26.4576	25.934	23.0532	25.8598	23.9663	26.3832	20.8827	30.2826	10.4602	14.1112	10.0843	15.9622	18.0314	16.5888	21.5222	16.9082	16.5965	26.0365	16.797	21.0543	22.3553	22.2731	18.7526	25.9398	18.3496	20.383	25.3662	23.8464	26.6201	18.7681	19.7789	19.6011	14.9342	19.5734	21.8607	19.0316	20.8608	16.064	16.9829	16.012	13.682	22.2764	32.2384	16.7932	24.727	17.3157	22.8246	19.1726	22.6183
200923_at	29.0916	27.4256	27.0392	28.4504	25.7715	23.6971	19.0418	30.6718	24.4796	28.4108	21.3713	21.9965	23.0447	21.1436	22.4818	22.6592	24.2832	25.6579	24.7412	21.1548	22.8186	21.6493	21.2507	22.4716	25.5589	21.4157	30.1236	21.6477	22.1692	27.6163	21.7953	21.7181	19.0169	26.7368	20.5736	22.946	23.6561	20.3885	21.9832	25.9141	20.7551	20.9885	21.2569	21.8872	20.7867	23.948	24.9829	25.0331	22.7027
200924_s_at	22.5443	23.6216	18.7112	23.7184	24.4738	19.2619	23.7297	28.5231	16.1896	11.55	11.6947	15.9733	20.6043	12.851	21.0228	27.1625	14.6234	24.1337	21.7526	27.6354	31.0768	26.4801	18.3806	37.9403	23.2158	25.1714	36.7532	35.8275	26.7262	34.5164	18.2554	51.39	16.6696	19.9069	54.2573	22.4044	22.38	19.7334	18.8151	19.1163	26.4463	50.4495	31.8901	30.0177	30.8991	12.1283	26.1993	32.375	15.4656
200925_at	402.181	366.712	334.245	287.958	287.291	661.329	816.129	753.995	734.696	425.205	278.955	422.78	607.768	264.427	712.655	946.656	755.138	614.213	672.347	715.918	778.688	1032.57	425.423	755.903	1094.57	837.14	849.954	951.291	1128.13	575.516	491.666	643.2	497.695	566.339	404.263	909.452	517.296	575.236	469.465	772.474	285.077	670.81	782.104	500.695	498.222	655.542	289.957	350.881	524.449
200926_at	6514.08	5772.74	7152.19	4809.89	4988.7	4882.23	9201.07	7023.05	6063.93	6193.75	2971.63	4049.34	6680.13	3094.44	4376.98	9512.36	9675.06	7288.16	5528.08	4410.6	6576.04	5624.7	3674.32	7499.3	8611.89	6937.47	4609.08	6152.57	3072.47	1691.17	594.718	2014.76	1835.01	808.066	1903.62	2247.2	665.832	1232.17	1249.02	5473.52	2282.42	2976.29	3323.04	697.287	1507.39	3480.72	2612.89	2945.96	6804.43
200927_s_at	161.737	267.147	183.48	266.506	261.381	351.95	290.926	186.965	165.998	130.101	129.174	223.985	297.735	196.466	333.104	336.089	122.776	480.232	296.041	140.418	206.4	347.591	197.583	751.714	322.298	370.231	637.219	454.107	661.877	90.2425	35.9286	103.588	52.7652	70.8043	183.159	126.447	77.6247	31.1349	78.7924	50.4558	40.5032	119.641	141.57	60.4231	77.937	40.3625	131.614	96.7899	222.633
200928_s_at	120.387	78.2004	95.4698	81.2163	116.398	109.588	49.8888	60.7025	50.6717	38.1072	46.0833	78.8675	186.432	46.4597	96.9285	77.5056	52.7865	77.2746	45.7426	87.7811	91.7923	105.252	57.2163	220.28	65.1914	165.652	172.761	107.451	59.9082	27.0034	18.3107	23.6077	23.7921	18.5375	34.5269	33.7483	24.1472	23.8486	26.0913	53.4927	24.2073	31.5153	27.4575	23.7747	35.1209	20.8686	39.6824	19.3805	217.493
200929_at	118.506	138.993	35.0577	71.7457	105.813	137.86	103.204	82.5186	44.9571	56.1245	22.2254	73.6198	130.05	73.1898	138.857	79.0238	31.1793	82.7825	65.9536	86.2053	135.625	129.229	113.479	126.529	64.9363	140.464	167.883	260.681	176.241	134.927	66.4442	189.757	48.0021	178.358	91.524	123.872	178.17	48.8508	133.905	67.546	32.1383	160.041	208.381	105.928	168.783	38.8563	60.6853	113.438	189.377
200930_s_at	25.4667	24.6233	35.6703	24.8082	24.2759	21.9471	39.1574	29.4068	35.5783	35.2871	30.5583	29.0932	29.2807	29.5588	27.0874	29.8227	28.429	29.9464	28.1446	35.2229	31.2429	34.3962	32.6391	35.4101	38.3532	30.3845	29.4097	33.8155	30.0685	27.1164	25.6894	27.693	23.8574	22.8972	28.3019	25.4787	25.3225	43.4458	24.6795	38.1968	28.0818	26.7836	25.3205	27.2856	29.8893	28.8979	22.5077	29.9494	27.8027
200931_s_at	1474.82	1289.79	1740.08	1913.16	2364.28	1252.68	1920.24	1387	2344.79	618.207	1334	2033.93	2563.98	1638.64	3053.44	3422.49	2120.51	1804.89	2257.95	3413.96	1655.83	2535.83	6146.53	7268.9	6753.7	5495.4	5364.02	3387.59	3528.4	907.039	1013.3	811.693	1290.2	2876.22	381.68	1356.33	1570.77	1072.7	1348.09	4002.28	1180.83	379.081	994.248	1301.26	1595.86	3137.58	3181.34	1453.31	4685.99
200932_s_at	43.0262	52.4218	38.3183	56.8482	57.3667	63.5534	87.0599	113.004	43.204	39.8164	39.2813	63.2069	86.1081	56.5571	83.4337	150.654	52.9241	134.16	89.2911	82.2708	161.941	134.627	47.0954	90.9378	141.518	213.044	170.473	129.579	80.4389	82.6533	76.2689	117.112	48.5158	48.8252	80.1981	76.4681	55.347	82.6203	58.0792	63.2151	60.8211	281.988	44.5425	55.446	36.4674	33.2618	47.2933	51.4461	81.9726
200933_x_at	4269.26	3623.51	4756.82	2985.01	3395.55	2922.82	8502.21	6093.99	5565.33	5196.99	2169.65	2898.28	5103.6	1973.14	3229.51	6797.52	7936.16	5460.23	4691.85	3321.66	4519.69	4557.12	1497.63	5472.31	6240.36	4871.08	3093.68	4105.35	2650.12	868.705	566.715	1011.5	832.042	400.74	1055.32	1077.78	514.811	764.008	616.995	3550.85	1398.12	1622.71	1985.52	370.413	676.755	1224.79	1912.2	1719	5048.56
200934_at	926.204	810.7	622.542	680.88	834.013	837.61	1616.34	1906.2	2181.76	882.868	744.714	884.977	1128.97	748.716	974.403	2499.39	2133.29	2073.2	2164.38	846.656	1136.81	1410.52	899.531	2285.21	2510.97	1718.46	1391.94	1628.51	1337.36	683.254	172.05	893.7	202.07	277.016	860.061	645.021	215.508	118.673	160.257	707.548	616.275	687.395	1028.52	110.986	321.838	613.112	729.851	756.54	1788.03
200935_at	26.8121	30.522	25.7801	26.606	27.6457	29.1319	33.5704	29.1565	35.5249	30.6316	21.6056	28.0015	32.5777	26.5214	32.934	34.3935	26.6344	45.1357	27.5276	20.3532	81.4891	39.9981	27.9851	55.797	39.544	42.8747	55.2624	121.91	55.3984	51.1738	29.5705	69.7654	24.9828	42.4476	29.2914	30.1975	49.2457	30.9514	36.2674	27.2433	23.4865	54.3562	24.3972	29.492	46.8555	24.0042	35.4995	42.9383	58.7487
200936_at	1754.85	1619.65	2426.48	1339.11	1181.42	2383.84	4007.99	2964.64	2828.98	2572.3	1682.85	1406.51	1723.28	1147.85	1175.68	4687.41	3858.67	2483.89	2043.63	3035.06	2721.23	3461.17	5648.38	2048.43	5819.05	4096.82	1947.25	2289.61	2246.79	749.211	531.234	982.112	466.693	420.895	831.645	530.503	436.476	441.014	457.205	1883.13	676.492	1587.22	1156.32	410.95	360.726	1052.1	579.602	1133.55	2337.24
200937_s_at	2708.3	2461.34	2882.57	1752.89	1747.87	2195.7	5492.17	4334.61	4376.28	3058.14	1824.01	1955.26	2962.84	1348.76	2005.14	6438.61	6426.82	4439.92	2963.14	3433.49	3723.9	3783.31	1727.95	3954.08	6397.78	3979.51	2726.69	3194.09	2164.69	504.24	249.536	781.248	441.686	251.434	485.187	344.807	253.569	348.952	440.698	2558.44	550.253	1032.76	1015.9	263.203	417.432	616.027	848.182	786.041	2478.68
200938_s_at	60.3064	63.6103	63.6478	69.0413	66.1343	51.7531	76.8919	72.2116	77.1513	77.2645	123.697	83.3385	100.024	78.7609	49.5002	62.1691	83.8826	64.9199	47.7703	158.761	88.5967	76.4333	72.4266	51.6635	187.751	60.1162	59.1759	53.231	58.1814	47.2004	78.9103	51.0288	76.6244	45.0728	50.1095	68.786	51.2658	166.248	62.9892	81.9513	100.074	61.601	54.237	81.4806	53.2842	77.3947	50.7672	51.2241	60.1482
200939_s_at	28.7451	33.0588	30.7801	27.4861	28.9685	26.0929	26.7975	28.4719	76.2757	19.9163	32.3903	27.753	24.876	28.7249	25.6322	29.8513	42.8393	25.7445	25.4001	28.2423	26.9308	27.9213	27.6514	26.7686	29.3407	32.1795	24.2615	23.4304	25.659	22.2743	27.5171	18.4326	25.84	21.4264	19.8442	25.2367	22.9506	32.1326	22.4704	34.5718	35.5171	22.7448	22.1197	25.8566	25.0138	33.2266	21.2222	25.5179	24.9384
200940_s_at	1018.65	1219.52	1487.57	1009.51	1290.54	1118.59	1703.49	473.164	1408.73	713.692	1447.32	1215.45	1321.25	895.174	1274.92	1294.28	661.336	1394.68	1202.69	1540.81	951.612	800.632	1990.3	1126.98	1194.61	1288.54	885.837	874.242	775.504	336.338	139.686	438.868	105.213	125.044	216.073	104.956	185.766	130.91	175.723	457.768	224.911	224.615	59.079	321.906	330.079	347.017	278.465	327.063	1311.95
200941_at	532.58	615.747	628.163	557.631	702.57	531.686	1309.87	825.982	1506.71	465.016	687.936	742.107	753.196	774.775	755.5	1548.27	944.491	1481.23	1442.98	1101.37	681.798	769.267	418.738	1176.46	1122.18	1488.74	839.368	812.086	513.654	84.2748	44.9829	110.566	29.3257	38.3454	144.392	75.0872	56.2918	76.3609	62.4628	362.5	172.412	209.436	51.7912	49.5987	48.4578	26.337	148.398	288.642	1361.07
200942_s_at	104.183	165.387	151.031	173.191	138.688	163.17	269.083	388.918	241.838	198.669	135.144	173.673	227.085	116.076	255.388	305.633	119.896	318.459	232.066	229.634	373.285	215.331	281.022	372.734	290.208	463.645	361.696	476.08	167.332	43.2057	57.9598	175.324	43.6476	42.0385	87.4725	49.174	46.7063	83.9752	61.5864	116.722	81.6609	286.295	460.54	79.1074	57.381	87.1693	106.641	51.8733	192.397
200943_at	2723.46	2335.02	2792	2408.24	2114.76	2182.43	4288.61	3843.54	4356.58	2570.97	1762.76	2182.66	3328.79	1761.76	2195.44	5044.34	5157.31	3967.52	3101.56	2053.06	2188.68	2213.4	2842.37	4771.78	4408.12	2720.98	2508.12	3037.52	2110.3	507.437	135.582	600.191	272.78	206.799	582.616	502.542	305.464	78.4243	476.916	1988.09	604.291	607.517	1482.98	154.681	623.616	1095.43	1356.25	682.941	3686.16
200944_s_at	4303.41	3523.11	4871.61	3251.62	3674.23	2945.89	6908.23	5149.85	5561.15	4053.05	2234.06	2927.2	4663.78	2298.07	3066.31	7414.1	7073.18	5843.79	4035.94	2784.03	3670.37	3555.34	3688.08	6411.86	6595.79	4435.58	3383.17	4141.01	2240.67	740.97	95.8318	791.332	510.503	288.981	881.043	1179.56	175.409	227.934	640.826	3320.91	1127.12	1106.95	2757.05	308.965	796.602	1799.49	1775.5	1030.54	5222.77
200945_s_at	257.414	397.806	190.17	294.795	254.503	460.588	519.401	489.253	426.791	290.181	296.715	375.919	559.201	258.679	465.276	430.614	226.044	435.505	335.888	347.12	432.177	421.717	388.162	468.472	387.915	380.843	481.768	663.523	437.596	180.721	100.253	290.032	98.8694	169.592	90.244	146.05	162.114	64.1354	267.4	217.502	43.4235	145.335	108.6	100.875	265.849	141.087	169.425	126.695	293.56
200946_x_at	107.589	157.425	119.007	124.222	124.536	163.212	107.557	75.2872	66.8973	95.7452	85.9386	112.343	140.626	94.5622	139.383	156.246	79.7893	151.329	110.051	135.838	167.484	150.216	86.8504	176.795	98.8143	235.458	156.807	118.712	165.787	42.8925	72.8814	50.0677	54.3501	42.8697	33.6707	47.9356	46.2187	84.4168	54.0559	60.9385	58.6901	61.7027	83.0501	68.2386	50.6126	65.1566	70.3298	106.78	377.792
200947_s_at	430.844	512.129	317.521	439.716	411.203	610.051	564.457	507.019	690.415	392.74	404.119	484.198	593.421	333.13	688.028	766.224	478.813	1091.3	560.044	468.068	362.954	450.283	105.906	752.306	597.961	639.258	541.222	523.063	393.409	67.4993	29.0538	74.8636	29.7651	21.285	82.9804	46.5176	29.3521	28.9112	38.9798	138.709	65.4643	79.5715	37.0837	79.5151	83.1018	16.6416	129.793	124.327	546.867
200948_at	87.2771	88.2885	32.9907	58.4382	80.9388	135.192	46.8053	25.8863	28.0666	21.5485	22.1718	53.1416	88.1586	54.0699	75.4597	48.6567	16.9243	75.38	53.4732	52.618	55.5081	54.7062	60.7296	91.6262	50.6798	78.048	81.2786	109.019	69.0742	57.9237	22.2831	137.154	23.4236	88.1711	44.1566	25.0661	62.3603	27.9181	43.4677	31.8039	27.585	48.6387	52.1337	25.3008	101.16	34.4943	34.7894	42.2464	157.391
200949_x_at	7163.05	6692.77	7459.09	5838.57	6535.13	4672.2	9696.27	7955.83	6049.25	6916.73	3037.26	4655.12	7296.8	3585.58	5909.47	8273.34	8469.88	5986.99	6244.28	5429.65	7123.3	5902.4	2742.06	6959.1	7362.54	7007.22	5538.47	6299.42	3970.74	3469.89	1840.44	3594.48	3397.53	3105.36	3585.53	4701.78	2524.96	3925.23	3133.2	6042.67	4051.19	4732.31	5775.64	2821.44	3078.52	5628.99	3844.54	4999.25	7118.62
200950_at	81.893	88.6711	60.5172	86.7562	95.1798	79.0875	82.2496	54.5261	35.575	52.1128	49.1435	78.9671	99.8293	75.4025	105.117	128.449	69.1299	93.9319	110.459	98.401	148.049	104.924	48.1969	154.419	76.8301	96.8999	151.68	147.87	170.162	142.789	88.4947	359.448	74.5478	254.844	127.792	109.243	179.711	103.299	191.601	59.7885	69.4384	208.642	106.178	140.64	230.146	58.6918	95.6055	111.498	85.6979
200951_s_at	36.2052	35.5848	29.678	29.1836	31.0997	31.9976	31.6485	35.6577	24.7251	32.7159	30.7727	28.2332	29.9971	26.4451	26.0286	41.9307	33.5321	36.5736	28.4719	30.1993	38.8605	50.9742	32.9955	34.6741	38.3986	34.0977	35.6956	32.1951	33.0406	23.0884	33.7453	24.9546	27.5607	21.2508	29.2459	27.3364	24.4096	32.7951	17.5841	31.7081	25.3357	29.3603	23.9365	30.2766	23.4814	28.7888	17.155	24.3038	33.5921
200952_s_at	46.7815	60.2619	29.9531	67.1311	79.0167	53.4333	35.8445	26.642	21.9624	27.8732	27.6242	39.4985	39.8851	41.5801	53.1297	35.7766	37.7538	96.1257	108.913	42.2207	34.5215	32.119	37.2477	69.7732	47.6279	29.4961	75.254	101.054	84.4069	25.1021	31.3564	35.285	27.9087	41.116	35.7673	36.8086	36.6839	23.2306	33.1287	34.3131	23.5447	31.8514	42.1412	32.8292	29.8331	29.8142	34.952	35.432	37.7343
200953_s_at	987.936	1381.08	999.267	1135.86	1209.7	1182.23	2732.63	2707.84	4551	1637.2	1481.46	1473.09	2185.61	1152.56	1261.82	4551.1	5144.6	3113.43	2178.05	2182.61	2667.57	2506.15	3580.24	3304.72	4648.8	2265.63	2327.81	2519.51	1905.15	172.236	51.6336	369.874	355.855	83.3321	225.83	84.9335	158.222	86.3353	222.651	1137.91	212.187	332.61	1270.28	114.955	357.232	554.567	684.735	259.013	1710.59
200954_at	28.8746	32.14	30.5439	32.3406	32.6456	36.4648	15.2762	17.5483	12.7639	17.4854	15.4325	22.1042	20.7942	19.9144	37.3559	21.1959	14.9193	21.7251	17.0609	46.0976	52.4902	42.6578	26.4374	27.2927	40.3577	25.3884	51.2818	44.9368	36.024	302.19	136.499	258.375	140.897	918.7	82.4112	134.493	504.17	51.477	340.757	58.5219	31.0659	99.0967	296.613	117.951	369.763	63.5953	56.2694	52.1103	15.4527
200955_at	268.232	259.107	455.624	349.303	250.759	522.49	437.661	323.59	365.079	403.939	460.881	399.287	492.983	378.913	295.244	635.353	300.657	445.936	302.35	408.845	906.014	760.555	785.995	571.923	619.205	945.915	441.363	637.469	498.811	170.348	124.824	449.271	129.621	89.5377	312.78	169.897	123.443	252.33	151.809	275.534	182.209	1261.58	422.107	263.13	137.713	219.502	200.112	287.624	438.749
200956_s_at	77.4768	90.7095	98.7092	54.5457	61.741	63.5707	118.304	71.9858	156.279	102.347	66.2497	69.5971	74.6931	59.1082	80.2146	193.171	77.9337	146.769	106.267	88.8081	165.921	155.682	100.23	126.741	233.541	203.339	174.636	129.977	78.9907	65.9863	79.0981	84.7534	61.9164	64.1678	136.57	77.1695	53.2641	108.813	55.6221	90.4709	73.864	322.342	74.5208	65.662	61.0093	72.5785	52.943	77.2837	85.2515
200957_s_at	86.3524	74.356	32.0346	47.366	55.0989	95.8806	84.4087	103.935	65.7667	36.4514	33.1053	55.3441	100.625	43.1376	65.2867	253.716	58.5812	132.403	90.7011	71.2929	219.482	161.092	120.867	190.511	208.2	247.516	179.886	149.945	146.105	82.9465	58.4008	113.875	39.6806	42.2453	92.4942	57.285	47.1717	18.195	54.023	72.2205	44.2675	392.185	47.7029	36.88	38.4372	32.7855	38.6219	93.0319	75.2496
200958_s_at	1945.62	1923.67	1692.07	1814.1	2093.07	1244.44	2210.93	2536.71	2307.81	2047.3	1145.25	1574.23	1855.33	1321.21	2187.67	1984.54	1982.67	1634.5	2618.17	1816.14	2267.88	2453.66	1182.49	2616.19	2403.05	1917.19	2758.61	2701.22	3002.77	4465.71	3447.92	3660.48	3486.64	4914.36	2562.89	5374.24	3810.29	5351.11	3790.7	5137.25	2868.5	2050.55	3724.16	4128.44	3908.44	4776.54	2693.76	2789.82	1941.01
200959_at	793.24	944.67	972.214	897.593	874.747	985.77	2395.69	1211.79	2311.88	1559.11	1697.86	1306.2	2239.38	824.326	928.766	2224.6	1523.71	1642.51	1707.79	1269.98	1141.26	929.659	2774.17	1567.01	1990.89	1403.34	1030.82	1008.07	1220.97	117.438	33.4951	199.797	63.5866	35.472	252.882	64.6469	56.9933	115.777	147.726	494.215	153.908	361.574	176.576	73.8404	111.574	124.362	477.751	206.278	1488.5
200960_x_at	161.557	80.1318	85.9814	81.3148	142.425	97.3503	149.654	126.355	98.9931	50.6559	67.4719	99.0949	145.874	78.7704	124.377	139.938	69.9769	140.628	142.143	152.723	140.04	141.708	165.531	159.535	120.392	222.643	171.043	133.815	103.071	61.3662	52.4997	76.9064	43.0379	30.8945	60.7951	54.6083	38.3415	53.5097	56.7439	102.15	51.5942	183.794	78.6988	35.8652	47.21	36.709	49.6818	44.1541	399.418
200961_at	707.988	868.362	531.749	597.535	729.941	572.869	1279.99	1562.67	1618.22	581.271	725.686	772.663	1180.61	463.848	896.874	1539.73	1037.36	1151.86	1132.13	1141.68	728.715	1066.91	3890.58	1408.03	2256.78	1452.13	822.376	1102.75	1087.8	184.562	40.3856	441.255	96.0051	42.3238	133.413	108.494	31.7421	20.3176	100.923	387.126	84.4589	386.464	210.373	73.0314	67.5269	131.282	176.649	211.358	887.027
200962_at	71.9271	91.1122	41.8481	69.3963	68.2341	109.008	55.2993	49.4767	17.7166	28.4123	19.386	51.6684	85.4513	48.551	88.6124	78.2305	23.5941	77.5698	56.3831	70.1117	74.5122	43.542	59.1215	76.8802	48.4426	106.088	79.3552	62.7477	83.2865	26.2714	48.3597	40.2703	41.947	38.4813	31.5804	22.044	24.922	19.4617	31.9393	33.3461	17.0021	27.4188	54.6641	29.8957	35.0281	26.3316	48.9206	30.9842	97.7167
200963_x_at	6439.43	5393.41	6076.77	4828.86	5096.43	4013	8483.2	6937.71	5185.79	6197.96	2905.73	3840.95	5640.71	2867.97	4630.13	6882.35	6234.35	5068.14	5462.34	4864.73	5619.2	5352.68	3321.78	5667.33	6289.24	5866.44	4231.46	4771.17	3369.96	1624.17	1047.15	2064.76	1987.18	1467.55	2080.37	3348.07	1370.1	2921.8	2166.5	4994.99	2584.22	3215.32	5677	1709.09	2001.98	4712.64	2732.34	3494.18	5980
200964_at	455.191	232.931	263.495	182.605	342.514	355.274	290.377	320.075	434.114	81.8244	102.167	194.044	467.388	94.2171	315.121	356.152	131.976	261.06	317.875	543.212	421.99	426.488	32.2841	387.159	304.54	578.039	215.294	403.178	178.242	149.808	194.326	434.98	46.9229	220.56	171.323	116.163	394.009	114.975	93.1898	230.248	72.5475	241.551	42.5462	132.555	242.874	17.2417	59.9187	92.6986	773.629
200965_s_at	1416.26	1361.89	3883.03	2272.85	2447.26	2823.72	3750.27	1879.72	6151.32	9672.8	6008.72	2902.8	6564.62	1098.37	1638.81	5409.32	4604.02	6301.71	3629.78	6253.51	3762.62	4535.41	506.36	3243.93	7861.35	4182.85	4359.8	1814.15	2882.96	229.779	104.391	342.707	288.444	78.2794	167.684	277.392	269.538	42.3683	359.189	1688.05	299.062	134.921	3683.45	149.272	584.225	98.01	1781.02	480.188	2390.47
200966_x_at	122.455	107.676	122.488	112.958	160.222	175.463	399.184	294.073	239.088	94.0384	96.7019	190.095	254.856	156.692	338.148	839.964	201.036	312.068	285.545	316.164	746.051	759.516	241.855	710.302	685.619	1089.16	476.781	554.826	260.814	158.613	68.8819	139.083	44.6865	82.7329	120.33	92.6001	87.2852	52.9269	81.3817	127.453	59.1792	448.859	88.6761	83.9524	98.8179	45.9386	67.5636	86.9296	338.43
200967_at	200.275	235.153	232.305	169.365	137.754	276.493	895.749	665.414	290.191	281.697	201.411	236.233	336.38	239.757	191.724	763.86	239.774	247.595	127.682	286.379	676.953	587.481	197.06	437.357	737.218	731.542	453.838	902.818	192.756	116.265	178.314	105.845	106.807	47.0404	199.865	134.362	123.799	325.984	125.94	143.36	110.223	288.26	105.476	147.181	77.9885	90.4157	77.6897	115.817	315
200968_s_at	141.997	86.2927	108.66	114.369	61.3486	129.055	322.823	284.63	137.732	101.555	84.7164	104.02	191.283	66.1109	109.284	259.642	85.9728	147.824	42.7727	118.222	298.502	261.773	55.6035	210.021	303.509	309.27	177.389	279.93	68.6573	73.9956	118.342	72.8138	40.9683	39.609	89.5013	51.386	60.3313	121.096	68.3738	70.5209	74.3693	174.813	36.7143	48.1705	57.7139	24.608	42.882	86.8668	134.028
200969_at	321.853	482.523	253.122	369.514	354.3	567.039	956.622	553.508	1065.83	513.909	253.41	424.231	666.748	286.153	669.925	958.373	933.429	1173.48	900.038	834.993	865.328	971.637	241.74	1107.51	894.661	812.939	1205.27	1066.17	1224.48	404.397	120.032	363.811	263.867	358.235	305.945	309.373	579.441	138.717	502.103	525.391	212.273	210.844	734.796	247.103	381.856	286.27	291.521	228.667	1079.19
200970_s_at	104.398	82.9168	42.5731	73.5239	91.0455	95.4377	116.691	72.8603	62.1751	26.2705	23.538	65.1911	124.214	54.8765	112.571	125.501	44.2435	198.065	107.832	89.2266	149.241	154.121	92.0244	204.075	89.4026	118.423	187.852	253.261	253.079	135.139	22.7419	72.0717	25.3851	43.0595	65.3467	39.8104	96.619	18.9705	56.5442	44.7039	21.3085	105.078	54.1382	74.694	106.105	28.572	43.3239	69.9967	176.544
200971_s_at	214.834	324.477	126.258	170.337	234.69	341.45	219.277	391.42	177.066	262.012	138.91	236.942	316.415	194.488	368.71	288.25	175.028	270.615	148.695	193.087	266.63	366.954	763.236	370.68	400.978	549.278	316.561	341.282	196.481	175.732	75.8076	230.069	86.9277	208.129	158.742	90.1288	219.237	60.2364	89.3729	105.197	50.8545	387.215	70.027	92.431	187.711	61.8951	88.5385	185.86	234.991
200972_at	877.451	430.448	475.352	319.344	490.74	772.578	339.515	230.51	425.855	32.6201	244.935	273.29	625.008	151.004	241.307	316.096	136.651	482.824	217.388	223.514	151.692	212.095	313.718	269.787	311.1	269.396	251.228	227.234	263.847	23.9804	11.9905	60.1999	7.68147	8.57651	74.0406	14.2209	9.39021	4.6151	11.5466	89.0037	30.6436	30.4383	138.906	8.47122	26.8196	5.60652	32.5113	10.816	511.406
200973_s_at	96.0011	64.9707	45.7376	76.467	59.7706	270.219	37.3273	15.1319	17.9567	8.4586	17.6022	42.9054	131.051	28.2217	52.0543	69.7513	10.1556	69.9384	16.3131	41.6059	41.5176	40.3167	19.7163	63.712	36.8406	62.3282	69.7544	80.8885	38.192	21.4636	14.6327	17.2626	10.0516	13.7415	23.4133	14.5583	17.7254	9.04441	12.5905	20.8556	8.52971	16.927	11.2815	14.5866	12.4411	9.00017	18.5604	11.3557	59.5636
200974_at	60.9032	52.1562	39.5305	60.5956	53.427	44.7845	61.055	47.475	25.5302	75.4319	56.2809	60.876	59.4534	69.094	59.4028	56.5704	63.6634	54.8908	57.513	61.3415	70.2921	73.381	67.0722	64.1335	74.8336	72.83	57.5056	67.2519	68.7474	60.6541	54.4997	68.9951	66.6179	69.0574	59.2791	72.348	67.5071	78.1301	73.2026	73.9389	57.5086	62.9396	61.2491	75.5377	63.0971	69.2185	45.2832	54.0886	56.2589
200975_at	293.172	238.653	62.8535	145.719	170.97	232.437	380.548	256.589	241.844	121.781	237.395	333.884	320.843	242.193	673.684	342.543	150.51	439.182	159.57	178.431	297.631	261.806	101.271	361.603	332.767	693.086	202.545	290.558	164.393	40.073	39.4274	56.4449	47.9273	20.5461	35.154	44.7072	35.1923	34.2535	35.411	105.592	82.014	246.329	31.8761	38.4827	22.8898	28.8933	24.5827	67.9427	705.386
200976_s_at	234.93	172.661	168.046	203.092	217.974	365.818	189.255	120.991	146.489	216.553	179.204	266.902	317.507	174.614	510.77	165.955	48.8138	283.698	239.87	229.653	376.253	284.242	113.26	486.977	198.39	380.144	546.837	794.699	455.846	2391.88	1103.06	1311.95	1692.12	3479.23	535.92	3105.49	1717.77	2684.73	2159.16	2936.93	626.858	497.956	1682.57	2273.33	2745.77	2221.58	578.966	422.592	134.114
200977_s_at	189.948	486.225	121.008	209.211	163.404	638.674	187.234	218.173	186.581	215.614	223.985	377.146	413.498	347.917	627.869	178.269	103.223	359.666	254.462	291.851	550.28	576.035	122.069	821.797	424.39	492.703	700.825	821.839	595.224	3252.04	2174.79	2307.32	2642.52	5197.94	1080.49	5852.18	2302.67	3851.38	3020.86	4908.7	715.989	1031.09	6332.92	2881.42	3624.33	2019.13	905.287	671.414	379.485
200978_at	71.2755	71.9493	38.5497	65.7568	63.6001	112.213	91.6237	62.7275	63.4811	31.8958	24.3094	62.8342	156.476	39.6384	103.382	155.399	39.8657	186.586	106.742	96.585	172.057	161.819	60.8578	185.01	124.533	235.726	185.338	231.546	147.381	63.3372	29.4442	70.5752	23.8532	35.2125	74.723	36.5949	48.3141	19.0346	33.6774	49.9136	45.3844	201.41	137.865	21.0815	31.7575	11.8328	26.5594	59.9272	167.386
200979_at	33.1175	29.1681	21.7554	33.2486	34.1858	32.5964	28.7662	95.4652	10.7067	13.0816	18.5867	24.9195	32.1439	22.1305	29.1653	39.598	19.5514	49.1689	23.8782	31.1678	32.1407	44.9909	29.8368	51.8504	59.1377	130.149	51.7879	82.4772	42.4684	32.9901	21.2275	41.0951	19.0471	22.2729	45.9047	23.263	34.6649	27.0148	19.1644	21.7751	18.6607	69.2595	23.3359	22.1244	22.1988	20.528	29.688	29.797	20.3742
200980_s_at	189.941	127.136	79.4144	162.037	103.758	217.593	123.189	203.963	155.891	61.9405	66.6969	144.501	311.323	99.4594	211.117	309.76	102.114	304.244	174.56	183.511	219.614	254.709	104.149	501.115	249.094	471.183	258.194	442.525	255.097	219.436	58.6875	145.545	46.4321	73.2429	147.335	61.241	48.0224	42.2539	46.0692	74.9148	52.7129	409.795	310.699	37.9512	66.4166	63.0086	67.3225	86.752	94.1371
200981_x_at	857.624	1057.15	1287.55	1460.6	1197.03	1553	1861.27	1178.71	1964.83	812.897	1486.6	1315.57	1618.57	854.83	1456.3	1296.16	895.268	1105.43	1155.9	2107.53	1668.91	1818.45	1739.43	1398.11	1795.26	1580.15	1878.01	1538.78	1792.48	1558.87	1381.71	1102.61	1966.25	1854.21	669.701	4045.06	1140.01	1993.41	1840.8	3308.88	676.243	1602.08	6422.69	1308.05	1502.26	3901.64	986.33	641.964	1337.48
200982_s_at	160.448	126.262	94.6958	122.525	114.735	215.969	62.5853	46.4908	64.3876	59.7699	66.7197	99.6411	199.202	57.609	128.741	72.9393	40.8017	90.2457	51.1386	154.221	124.108	65.7346	43.9065	95.1573	207.85	298.905	55.2929	188.154	60.279	28.9325	30.7131	26.0092	29.2443	28.4169	23.1619	26.4826	26.5476	39.8873	19.581	57.5336	29.9958	22.6723	27.74	32.3525	18.114	25.6934	31.4212	20.5908	137.608
200983_x_at	62.131	54.2121	44.0859	50.1956	70.9806	65.4528	51.6152	43.4571	47.6869	27.5067	16.6798	32.0887	39.6826	32.0212	50.0244	61.4297	35.9689	89.9642	67.7998	66.9988	117.637	206.805	68.0153	262.68	103.774	100.529	185.523	345.674	143.503	1902.32	1626.39	1008.66	1475.4	1569.75	514.8	2641.54	1210.25	1271.8	1548.59	1043.67	346.112	710.033	284.931	1309.46	1392.37	1866.84	215.182	614.799	32.5827
200984_s_at	38.5272	34.0356	27.1124	27.1683	32.6683	26.0358	45.5781	17.3978	19.0616	14.2551	8.32029	14.977	26.9669	11.526	19.4557	32.7489	15.189	100.422	158.188	75.4907	48.8463	36.6784	25.131	225.684	34.322	50.5633	188.987	263.147	106.325	921.211	295.192	779.313	391.378	955.033	337.396	1425.07	868.499	801.148	1103.34	585.56	274.185	264.33	421.416	929.304	928.873	1026.77	214.152	281.408	31.9571
200985_s_at	394.208	360.377	149.151	184.723	314.871	251.477	782.848	1093.63	1145.22	436.602	144.125	226.266	440.242	100.254	412.043	916.602	542.732	1094.02	1451.4	1299.17	788.597	994.333	643.62	1371.06	1250.77	682.619	1111.79	1546.1	1740.06	3354	2598.36	2742.13	2695.77	3488.53	1982.53	4390.11	2697.8	4895.94	3531.74	3774.58	2082.17	1650.22	3474.05	3785.39	3117.02	3448.58	1234.35	1612.52	481.659
200986_at	29.9628	34.8208	19.832	25.1231	27.5168	29.9466	39.2362	33.139	27.5035	20.1006	22.4802	26.412	28.3064	25.1142	30.4508	56.254	28.0655	51.0351	35.3601	67.0601	44.604	54.2823	34.5159	36.9454	42.3303	38.4002	46.8682	41.2507	37.4022	32.4499	31.8172	30.3959	27.9996	27.5537	26.0857	30.0079	28.9281	38.3692	33.0662	47.3566	22.2001	28.9776	29.7221	27.1936	23.5329	27.1778	22.7315	23.522	37.5684
200987_x_at	100.265	76.1921	42.0292	70.9346	76.6612	65.2058	69.6248	65.3851	41.8652	32.9225	30.7698	47.4198	57.4837	37.7088	75.8104	108.722	54.497	87.3888	61.9975	64.1395	117.565	98.0728	133.421	161.765	97.6386	131.01	247.16	139.279	162.5	84.5765	75.4468	85.1403	48.6752	63.618	61.9924	76.6528	54.8515	54.516	79.8131	36.8784	100.656	142.212	72.86	52.9169	58.5259	46.7993	67.9922	53.5295	55.8957
200988_s_at	31.0225	25.9173	20.6409	27.4295	25.8184	35.9132	16.7095	15.5926	14.0157	6.88943	9.21708	13.7999	17.1173	11.9394	19.2527	18.4045	10.2019	18.4223	12.4596	15.3452	27.9956	28.8158	13.1299	41.9147	14.3914	36.8144	37.7208	38.8882	28.8061	18.3618	10.4147	17.3663	8.50443	10.275	13.5814	10.643	11.0618	8.91315	9.72257	11.7633	8.5533	15.9415	10.9145	9.70116	9.6095	7.73289	12.5353	10.0041	18.8247
200989_at	1104.35	1021.9	1244.08	1138.13	1095.73	1364.32	2031.07	1716.29	1852.79	2689.34	683.021	928.213	1364.98	720.889	1104.49	1731.54	2054.67	2011.89	1763.3	968.888	989.214	949.221	2074.63	2015.2	1801.19	1298.19	1095.02	1324.51	879.485	344.797	51.6469	332.01	73.4574	60.0596	276.256	171.96	112.707	15.6501	189.347	571.39	214.073	300.769	748.801	11.8786	225.158	122.987	580.987	352.748	1590.96
200990_at	72.3715	78.5888	30.8144	53.7118	62.4896	93.0572	122.73	35.5927	50.7929	33.3356	39.116	52.897	78.5477	49.4145	51.5682	143.053	43.5825	121.373	62.9842	162.504	162.199	148.798	136.23	133.747	135.216	194.018	140.798	155.794	141.443	41.2989	39.6195	43.4395	38.342	23.5714	55.255	33.8581	35.4671	28.5979	24.7779	77.8784	24.4917	118.879	41.487	39.3374	29.4424	26.3592	26.2512	23.97	90.5328
200991_s_at	37.0398	26.4679	24.6297	29.2545	32.2031	35.0129	22.2795	14.9458	15.1918	14.4622	10.6185	17.5961	25.1755	13.2897	26.9839	30.9199	17.6536	27.611	16.291	58.1153	30.9036	44.3138	20.4062	46.6263	38.3626	82.3529	55.5288	52.2243	40.2593	48.9662	41.2421	44.2143	20.2751	55.6131	22.023	31.658	43.9247	38.9867	48.0698	36.5033	23.5349	27.3218	25.4579	26.8826	36.1466	17.5573	21.2369	23.632	31.5742
200992_at	192.561	197.241	95.0016	144.71	209.623	282.432	307.204	120.74	218.585	146.924	82.2087	142.432	239.776	122.313	170.701	452.234	229.464	729	249.749	191.094	355.455	331.897	88.8393	521.464	393.12	398.648	458.179	388.095	673.147	97.3108	34.1597	153.138	42.6294	27.9594	77.7367	67.6603	33.6251	25.2505	73.6377	68.162	40.867	249.039	111.641	23.7155	32.6851	76.6238	39.54	94.3345	468.531
200993_at	201.558	209.005	61.5008	158.643	201.173	219.838	220.249	214.378	149.301	115.371	98.6839	136.189	157.671	128.444	172.129	294.526	133.29	437.318	168.641	149.437	222.407	249.707	124.646	308.407	203.13	265.79	360.515	294.712	253.819	44.1802	38.6229	44.4355	42.8185	19.8862	69.8045	56.3441	48.3704	20.9753	37.0307	72.5858	46.6938	111.089	38.5107	28.8813	28.5689	20.4324	28.6261	43.1247	58.1553
200994_at	126.769	104.771	93.6663	77.0647	114.975	123.271	146.63	69.8219	131.98	57.9606	45.0029	89.9659	130.311	96.1669	116.162	181.791	102.534	269.525	93.0083	117.033	178.975	165.313	79.2533	244.661	149.075	168.802	292.379	207.283	158.713	37.8782	43.2607	32.4077	46.0615	15.5574	48.5672	33.2051	22.1351	39.2929	26.0653	90.6561	36.6371	90.8306	23.1834	44.7804	31.1707	30.5847	14.2522	27.8112	315.131
200995_at	971.998	937.417	988.677	730.456	1003.57	1034.24	2346.2	3133.25	2971.2	771.964	868.917	923.236	1411.12	628.595	942.621	4139.68	3382.73	2834.19	1682.14	1272.04	1507.61	1694.11	99.6608	2545.4	2974.4	1690.78	1354.28	1365.74	1755.93	395.18	59.284	554.014	102.157	56.4882	324.365	111.504	34.4687	45.2857	154.146	607.102	305.079	687.74	1272.88	20.6817	208.947	24.1812	223.862	292.904	1392.46
200996_at	2219.98	2172.2	2527.81	2081.18	2493.53	1815.81	2227.43	2201.4	2313.97	1368.84	1587.45	1802.71	2621.52	1150.32	2206.11	1949.43	1744.92	1702.18	1574.18	2158.54	2009.46	2055.95	1464.42	3034.02	3232.46	2383.95	3143.99	3142.74	2839.53	2691.88	2013.66	2237.98	2337.42	2780.39	1745.41	4207.81	2010.63	4400.24	2834.53	4233	1892.41	1752.96	3177.24	2872.06	2473.5	4231.82	1753.05	1657.85	2222.11
200997_at	33.6515	32.0405	30.1085	32.4099	34.2779	50.1118	40.1191	17.0457	16.8125	15.1906	15.5004	26.7667	56.0192	14.7246	40.1472	32.4581	11.4999	43.1707	22.0242	17.9757	35.5552	36.8968	17.9806	58.9689	28.2853	39.7631	55.2121	50.5533	32.8122	29.7837	13.7808	63.5579	10.1569	17.3047	39.3017	16.1276	13.1878	14.3723	14.7194	16.5121	15.3071	34.7244	12.6955	15.3836	17.3447	10.4984	18.2347	26.4424	32.6929
200998_s_at	57.3904	83.1133	79.4836	71.8985	71.0576	54.0156	43.4427	48.4353	27.2291	31.1322	49.4521	67.6138	69.1444	68.5888	89.1143	47.7257	66.0944	51.9494	41.4534	47.7743	54.6095	51.1212	37.9003	89.6546	54.0795	80.1396	46.8805	50.2336	53.1379	38.47	40.5524	42.8686	43.6162	43.1375	35.7501	40.0638	34.0035	84.938	49.9105	45.9937	42.3867	45.6965	41.6954	43.5241	35.5552	47.2403	47.0696	44	40.1317
200999_s_at	248.524	194.61	74.8332	145.732	313.64	57.6861	143.154	175.713	46.7741	53.3347	169.908	223.075	271.586	136.692	392.59	49.0167	17.2167	113.417	156.751	50.3953	85.8787	64.6173	577.084	551.838	111.423	473.634	128.317	98.4778	57.5326	36.167	12.9296	18.5648	9.73676	9.53689	17.7389	18.5171	14.9599	6.44531	23.7038	18.1979	58.6466	7.75655	59.2413	13.9101	21.7867	83.6402	189.355	85.853	387.753
201000_at	35.3797	43.5115	35.2581	35.6345	36.2198	45.7165	35.0879	39.643	24.4312	21.759	19.4079	26.2833	39.1212	22.7318	27.6502	50.6158	25.5457	45.4116	32.9163	39.4973	61.9308	39.7364	32.0103	49.854	52.2034	84.2835	71.1379	65.1333	45.18	49.9135	23.9262	33.1869	18.9691	28.237	35.9005	26.218	24.1169	29.3116	20.7707	24.8154	22.1158	94.8197	33.7987	22.0063	30.5346	17.5859	23.1664	43.482	29.2119
201001_s_at	387.355	634.353	536.785	380.059	463.22	517.729	512.292	509.89	502.187	444.312	628.275	508.506	486.721	423.814	515.918	467.612	734.586	596.441	458.057	734.403	620.78	840.088	451.072	692.307	881.527	681.689	897.114	765.35	739.588	2091.81	1542.49	1369.08	1841.87	2681.95	1015.26	3001.7	1389.13	2674.91	2095	2812.47	1130.46	934.31	3808.15	1243.32	1674.8	2717.03	889.297	918.117	358.121
201002_s_at	374.081	407.931	465.457	413.015	448.841	799.107	541.756	292.963	777.187	221.578	453.13	505.751	598.251	330.921	729.317	631.453	506.056	713.324	587.253	824.721	776.541	847.087	113.427	895.921	1231.03	887.837	983.91	960.07	1327.49	2728.58	2396.18	2327.06	2674.93	3716.37	1486.62	4333.17	2151.95	3980.68	2684.54	4669.5	1333.41	1812.96	7650.43	2150.25	2371.49	3671.36	946.975	1045.94	540.724
201003_x_at	37.9693	34.5871	24.6473	37.9885	39.8732	43.4276	30.2708	41.4423	13.8354	17.8142	19.0289	31.7048	29.6025	32.3894	55.3803	30.8197	29.7177	38.3846	27.6826	39.6153	33.5347	40.7858	40.1909	33.4394	35.2635	53.8276	43.8235	39.2421	47.5539	34.2359	32.5931	30.1949	27.3604	30.2131	26.2448	26.9948	25.5863	21.2538	29.261	35.75	22.8567	32.8727	29.7494	33.6158	31.0554	24.9163	23.4705	28.3263	47.9732
201004_at	1368.57	1149.48	1468.67	1001.22	1045.54	1828.22	4002.26	3534.11	3160.75	2254.85	1209.55	1530.48	1952.38	1546.15	1502.69	2438.55	2433.02	1607.58	1886.57	1669.02	2217.75	2401.47	1661	2021.17	4129.54	2992.4	1770.54	2592.79	2490.29	661.632	444.866	816.158	624.059	641.702	583.055	1109.66	508.776	563.313	519.622	1251.44	370.941	836.019	2316.56	696.437	679.631	2359.73	884.352	997.686	2636.06
201005_at	100.441	112.061	643.546	326.946	145.023	544.509	54.2655	93.0617	56.7533	26.945	308.331	306.694	387.977	246.544	299.989	59.0251	44.5525	51.6386	46.5611	49.4462	68.928	146.359	130.591	2142.17	269.86	577.693	1861.58	369.28	481.468	59.8144	51.3263	43.4474	46.0053	73.9427	33.2298	57.1529	63.6307	33.8689	57.8577	36.8475	39.8347	37.1021	162.279	44.0202	78.8699	53.5768	278.721	49.9078	387.098
201006_at	29.2935	23.0792	21.8498	24.5051	22.1891	25.9322	20.8643	21.4833	16.9239	20.6462	17.6552	19.5809	21.2231	18.4199	21.2995	25.3309	18.9503	17.2522	20.1548	19.7046	20.6367	23.4413	21.7815	24.8708	19.3859	21.4114	25.1064	24.5679	27.5271	42.323	53.5831	65.7511	32.8975	63.2005	38.1635	40.578	49.2293	18.7918	35.8766	22.7823	17.1245	117.78	39.5405	49.8454	36.3299	26.9654	29.504	45.2862	23.2885
201007_at	160.998	126.311	61.8135	113.474	129.086	217.093	197.73	229.244	173.227	56.0689	49.8592	121.672	251.252	79.06	221.287	249.387	85.9902	327.541	158.927	255.566	192.811	234.564	86.5325	341.415	195.645	311.059	362.624	359.953	164.295	144.245	76.6363	353.578	141.026	209.307	161.579	79.0067	271.447	97.6336	116.7	137.754	74.3672	158.237	46.8157	158.987	193.919	25.6221	132.48	91.08	185.029
201008_s_at	2534.3	2752.91	4764.77	3334.97	3922.8	3059.75	1114.91	870.097	1131.99	5013.44	3404.51	2916.51	3327.18	1749.76	3650.44	925.961	784.613	2653.68	2973.89	1538.84	716.069	1195.12	560.969	3293.86	6243.7	3395.99	2571.91	1461.39	3066.3	1263.97	329.686	1563.24	369.652	604.348	1895.4	472.709	1042.63	856.774	475.117	907.553	1466.34	759.333	4847.08	845.698	1241.51	1660.87	2270.79	1842.63	2964.83
201009_s_at	1990.42	1725.94	3003.44	2127.11	2947.55	2099.2	1458.28	790.065	1272.1	3948.48	3440.56	2456.25	2664.37	1519.74	2612.76	656.08	421.568	1508.22	1514.95	1010.37	631.405	758.773	193.789	2287.96	4649.35	3024.82	1325.53	757.26	1670.37	951.575	231.588	1694.88	400.479	415.113	1352.32	377.951	957.72	504.549	326.188	666.35	1032.02	665.51	2928.15	582.164	716.589	1520.09	1615.38	1131.24	2482.29
201010_s_at	2537.87	1649.56	3437.39	2226.52	3028.5	2197.86	1881.64	1217.35	1391.88	3401.91	2460.81	2539.25	3565.89	1725.31	2746.05	946.896	829.809	1759.91	1963.1	651.814	747.935	1122.23	245.951	2973.3	5060.21	2649.24	1827.45	1102.97	2389.11	720.341	301.337	1594.65	510.697	487.832	1563.18	819.793	550.194	613.366	361.683	653.114	842.264	889.849	1976.14	546.832	792.467	1667.31	1837.6	1119.24	2624.78
201011_at	111.451	118.319	47.5472	103.8	120.171	113.188	133.252	240.057	67.1254	143.362	44.2004	121.525	238.514	96.6487	214.054	228.335	103.408	259.523	249.485	161.765	373.341	228.483	198.445	424.682	185.982	290.549	399.144	382.615	317.221	214.816	90.4401	323.764	52.8607	145.083	174.716	78.6187	116.325	29.7736	157.738	72.9068	70.7931	300.184	162.791	99.268	150.961	37.4354	85.4717	162.028	579.838
201012_at	547.535	554.125	253.548	260.834	433.308	105.317	733.382	720.247	764.76	199.713	489.094	441.728	445.675	356.643	489.749	107.191	130.119	288.607	180.761	151.011	235.393	145.685	76.1383	797.008	159.342	432.149	144.778	605.626	70.4257	10.56	15.2798	14.2393	13.3995	9.85674	13.3181	19.4779	18.3946	26.3147	14.4934	54.8949	39.5802	12.6505	15.4283	20.5474	28.4436	13.1253	47.1315	39.9587	385.445
201013_s_at	177.096	128.457	48.8431	82.9381	105.187	123.654	395.93	232.203	425.489	75.7847	41.1942	106.409	228.525	87.7515	155.2	991.926	402.132	787.563	657.682	455.802	583.069	738.529	364.518	635.99	633.071	548.598	622.869	567.665	708.933	111.408	48.8359	176.411	26.3864	26.657	83.5582	72.0348	43.2716	19.0823	92.6912	162.713	62.7169	376.797	88.0796	29.9717	54.2694	19.6316	56.4632	80.488	342.494
201014_s_at	209.589	104.918	57.9704	80.6869	87.9308	130.466	431.089	258.587	353.632	83.8866	39.5343	87.7158	193.531	71.8529	107.682	557.17	360.982	850.724	382.496	437.007	395.96	392.849	292.666	763.704	458.979	440.168	718.871	618.932	821.174	84.6084	60.9384	212.926	44.8655	43.3145	116.141	84.6047	67.0615	27.4279	85.7835	123.53	68.9616	327.617	36.7968	92.4038	46.8801	23.9271	47.537	98.9	272.13
201015_s_at	38.0027	49.6778	30.3469	55.7831	51.4186	52.0798	36.3928	42.7548	18.6118	19.2757	21.4661	36.1318	52.6297	32.6164	46.2528	24.1252	24.398	38.5958	35.0554	57.6378	32.6344	30.6863	31.1238	42.434	27.1617	55.0641	34.2591	23.651	27.7389	26.4405	21.5256	21.5969	21.4241	20.6667	29.7737	22.4146	22.9537	22.7711	19.1283	35.7891	27.3376	32.0405	21.9959	29.6961	19.8024	27.6113	25.7772	27.8363	137.597
201016_at	643.684	609.415	337.499	331.366	386.579	532.437	723.58	946.414	1136.46	345.61	371.345	412.01	643.379	270.121	446.509	1017.62	1213.03	831.423	826.637	670.141	860.665	987.275	844.577	1220.92	922.323	516.255	958.428	1279.76	1724.47	436.862	126.032	383.692	180.125	143.022	474.696	220.734	199.335	145.106	356.794	497.386	270.267	696.605	1056.09	150.059	324.183	39.7574	472.379	388.571	693.233
201017_at	143.935	155.632	164.892	120.195	215.869	268.134	486.471	345.593	455.982	340.158	108	182.334	380.868	100.141	268.323	551.397	432.145	437.738	378.691	316.957	529.38	700.288	118.426	615.346	407.09	355.923	469.669	618.17	790.383	452.671	140	275.555	123.105	86.5363	239.531	162.627	178.186	44.9233	182.265	156.113	126.905	274.977	123.452	163.6	236.811	36.5386	233.293	210.845	458.338
201018_at	151.122	174.148	73.1891	95.7158	138.399	320.517	221.718	265.814	322.217	312.772	64.8602	120.929	251.106	75.0395	174.985	272.447	224.694	375.339	270.076	229.086	261.384	329.102	349.059	487.12	262.765	188.578	296.295	347.961	430.826	94.7984	38.0441	122.918	63.9824	26.4261	174.781	86.5281	51.3639	17.629	63.1449	74.0806	69.2263	281.54	42.8426	64.525	80.2683	19.0706	73.0281	78.3507	245.801
201019_s_at	472.673	311.811	234.106	230.525	313.037	474.834	866.584	914.291	1080.02	575.708	214.774	336.257	547.565	244.641	444.364	782.119	545.549	545.609	608.963	372.959	461.159	751.802	182.546	947.327	490.759	325.702	607.467	785.68	1029.42	342.508	88.0532	464.635	127.331	151.295	299.309	239.543	295.155	108.448	254.542	268.383	256.138	404.768	300.154	222.952	416.602	93.0647	284.833	291.88	838.758
201020_at	68.8087	75.8753	94.5759	130.659	142.213	137.191	115.92	110.324	55.2756	57.4771	44.4632	95.6784	121.798	116.916	132.355	213.114	87.6665	198.409	95.2903	67.6549	292.576	297.578	211.361	407.297	243.06	421.076	204.329	470.684	337.84	263.385	125.994	268.794	125.198	116.67	235.81	185.732	155.962	92.2382	173.147	58.4649	94.2694	939.887	106.536	153.941	131.107	103.075	110.005	127.016	227.793
201021_s_at	232.725	205.491	193.964	167.514	271.975	189.468	295.095	213.103	179.945	122.483	107.721	172.756	282.005	148.885	196.934	518.59	291.895	446.365	542.126	335.936	312.429	353.859	254.451	647.311	399.168	507.69	603.285	515.483	628.073	106.367	87.8673	161.508	83.0901	76.4859	94.1812	127.272	139.54	41.1258	104.025	156.648	80.68	392.054	171.287	85.4117	110.34	72.8793	125.635	157.327	474.953
201022_s_at	522.556	616.607	600.899	414.704	862.168	458.736	1396.39	1496.83	1985.69	737.868	555.214	706.946	937.287	529.449	906.544	2555.29	1896.13	1771.2	1855.6	1802.27	1407.52	2045.27	1356.95	2493.78	3059.44	2372.61	1906.99	2029.77	1701.36	329.229	100.089	375.66	76.4736	156.267	231.258	194.558	302.099	54.2672	297.567	686.593	137.531	425.755	231.921	201.477	200.981	144.113	425.64	405.015	1175.45
201023_at	165.578	189.585	106.654	178.246	265.368	347.009	83.2546	75.8514	92.0965	122.368	128.539	205.582	250.719	161.452	343.303	235.469	59.2619	359.082	282.252	297.153	237.242	281.29	145.449	266.859	167.562	264.121	382.043	347.649	253.374	430.063	150.885	364.172	257.09	394.655	190.917	390.027	738.721	114.846	454.3	215.912	94.0577	270.884	303.869	214.004	401.575	190.595	252.16	134.847	200.684
201024_x_at	1117.38	1231.78	1314.76	872.51	675.15	677.89	2125.69	2112.35	1976.44	1194.64	1659.45	782.147	881.39	752.634	339.967	1611.11	1942.59	1092.72	310.794	1159.1	681.176	1055.4	309.741	972.875	1487.1	770.269	628.444	723.547	890.707	213.523	206.408	167.125	248.424	42.3475	528.958	132.971	51.0827	351.617	102.943	562.534	324.796	593.451	322.576	151.315	340.947	311.111	237.051	135.762	232.187
201025_at	109.276	103.999	58.1886	88.2999	110.463	151.538	97.6169	94.5086	105.839	37.1681	45.6036	97.8138	195.185	75.0065	137.106	212.006	43.6505	192.402	160.977	156.526	139.249	174.862	141.028	223.168	137.865	144.49	259.193	234.605	193.307	75.2343	67.4971	67.6268	40.4572	66.627	116.177	56.2146	69.9134	42.2792	48.2584	31.8368	44.6874	126.921	44.5421	49.2976	66.1334	20.466	37.354	122.238	395.778
201026_at	88.7137	56.333	40.2888	49.793	47.151	100.251	105.076	79.066	68.7162	56.2176	43.3805	75.7086	118.211	78.2846	81.8377	120.392	32.0575	144.954	39.9509	47.5564	73.2074	110.377	129.651	101.261	75.5781	132.453	92.735	119.011	122.393	64.2548	27.7896	38.0583	29.7094	27.463	150.693	33.5926	32.4584	15.8949	35.0224	19.0357	30.2082	153.554	35.5453	32.4422	30.664	16.7837	40.0253	67.9385	92.9619
201027_s_at	180.04	93.1643	56.2352	120.834	112.683	188.699	238.787	142.172	194.679	94.9158	81.3096	159.763	341.617	90.3286	259.653	425.85	119.875	516.798	190.816	189.953	186.277	263.633	101.771	651.564	272.551	299.643	431.872	314.72	492.313	142.09	29.1498	102.96	27.9483	40.274	157.454	64.6823	107.913	29.654	73.1361	75.026	77.2238	278.953	40.9759	23.0727	167.24	27.3891	109.279	107.75	596.693
201028_s_at	101.566	108.128	143.281	226.984	138.034	332.267	289.756	107.267	148.949	143.051	191.517	237.458	182.812	297.831	304.906	193.126	138.998	974.145	318.097	466.373	448.559	242.454	176.795	287.181	458.808	802.472	333.809	161.324	159.604	170.149	110.51	460.161	63.5991	162.43	139.916	122.833	95.3316	155.981	78.3624	187.184	119.844	181.869	87.349	112.515	92.2004	75.0689	242.006	65.2171	127.754
201029_s_at	496.116	619.434	365.758	717.833	1006.97	592.544	1446.1	1021.67	2190.77	334.818	593.24	802.015	730.474	879.442	1085.65	907.151	592.766	1808.99	2087.87	1380.65	1101.18	676.941	139.039	582.474	1295.68	1701.32	949.28	671.865	367.336	456.823	91.8267	900.15	137.22	440.252	282.281	339.053	243.296	299.012	208.726	764.179	297.587	299.198	329.85	447.634	277.716	112.914	769.495	141.852	649.039
201030_x_at	641.614	604.644	557.597	395.918	546.676	624.858	2177.9	1800.28	2924.5	1661.08	595.912	682.002	934.078	474.822	818.552	5213.61	3822.03	3020.66	1398.97	2038.14	2301.87	2521.56	1269.86	2840.47	3994.92	2180.57	2128.5	1983.23	2162.67	207.293	54.4521	313.406	66.5079	34.5608	160.129	125.392	52.0859	31.0667	206.105	722.066	93.6547	540.688	359.63	37.3859	273.259	92.4444	190.289	218.42	808.986
201031_s_at	4417.98	3723.37	4319.36	3151.63	3839.2	3020.37	5592.19	4740.48	4280.34	3823.97	1990.12	2691.19	4115.06	2122.62	3017.54	4793.94	5608.42	3561.02	4253.19	2730.58	3782.77	3083.56	1460.38	3935.36	4185.77	3344.78	2917.87	3471	2529.7	1871.68	853.671	1792.86	1286.06	990.88	1938.63	2290.68	741.164	1625.72	1337.26	3443.62	2054.54	1949.4	4060.5	986.652	1468.03	2256.65	2408.35	2469.64	4074.79
201032_at	2442.33	1942.73	3631.66	2212.09	2157.46	2825.78	1994.53	1324.19	2470.01	1168.27	2137.5	1817.68	2694.35	978.26	1937.58	1806.64	1314.53	1566.68	1408.71	2192.08	2128.1	2131.54	62.5866	1918.57	2819.54	2297.77	1871.15	1881.94	2293.11	1957.43	1699.03	1214.4	1255.89	1895.46	713.687	3147.49	1709.36	2293.87	1473.11	3057.09	779.776	804.575	3558.11	1698.56	1105.05	2878.28	754.802	707.237	1684.3
201033_x_at	1748.89	1861.45	2192.51	1435.65	1304.19	1704.65	4668.28	3791.06	3852.14	2261.28	1545.23	1442.94	2170.55	1027.99	1257.3	4277.21	4018.94	3400.53	2527.2	2239.52	2124.84	2239.04	2741.35	2758.7	4494.83	3215.33	1616.11	1777.24	1511.29	495.595	98.3754	892.514	257.391	201.487	427.628	372.066	177.74	177.535	209.812	1628.17	509.408	1069.74	687.556	172.723	281.744	1334.68	504.68	677.014	2199.53
201034_at	1512.27	1112.86	2531.8	2108.02	2244.95	2368.23	1452.22	1850.77	2478.58	3597.2	2604.41	2037.42	3318.17	1124.16	1773.72	896.776	472.166	1527.15	1316.64	528.642	369.051	592.689	120.079	2112.89	2608.11	1723.01	864.498	693.97	1083.95	174.951	96.1712	587.449	64.2837	46.4384	351.522	147.791	207.691	35.0514	121.239	292.62	192.26	479.698	186.19	96.9485	155.056	551.333	732.635	344.789	1975.51
201035_s_at	84.7762	58.8817	48.1773	61.1816	80.505	117.761	143.655	80.6281	81.9003	57.4506	56.09	102.07	250.85	77.5585	99.462	225.766	70.1364	193.743	62.8324	126.497	298.019	288.806	76.2271	167.067	202.047	317.972	187.772	241.417	130.99	57.6293	57.4433	68.5498	42.4389	32.917	38.2571	63.5159	42.6525	40.5321	43.904	115.026	37.8615	144.96	52.0399	42.3025	43.5676	28.9438	45.8929	34.2915	83.7259
201036_s_at	171.708	208.477	100.444	130.309	106.95	270.698	652.47	222.486	461.475	44.906	105.631	242.858	545.259	156.519	385.873	1474.99	438.439	1533.27	688.246	570.093	498.492	809.388	198.557	1076.88	759.728	720.847	638.3	627.414	811.338	86.294	56.26	143.992	54.8583	31.9225	175.18	83.8967	71.1283	19.8627	69.0057	231.671	80.5693	173.208	51.004	44.2427	56.2336	16.694	120.863	44.1482	880.544
201037_at	107.811	141.05	184.6	137.786	91.6835	152.762	110.247	68.0585	142.91	85.3011	90.1866	83.5192	159.504	40.1047	84.3403	161.949	81.9201	74.4242	69.2869	137.437	113.398	117.405	50.9294	85.1748	72.7967	106.401	199.641	67.5018	98.2357	33.5941	52.5213	43.2842	31.9389	31.6763	33.9254	45.8105	30.7202	31.9958	35.8133	80.2929	22.15	29.4364	59.9555	36.9414	50.0058	44.036	62.7805	31.4588	145.37
201038_s_at	624.663	557.128	543.185	463.777	535.461	818.344	1342.61	1204.58	1581.2	749.228	668.2	666.206	1077.74	398.551	686.328	1551.69	1221.33	1201.61	1244.18	731.588	889.475	854.943	423.38	1318.01	1568.45	1182.78	742.619	847.386	861.325	213.085	61.7899	374.63	50.8186	38.3695	164.852	46.9942	58.5433	23.1684	68.0845	283.471	96.7777	344.402	315.721	13.3883	94.1399	29.8002	192.099	150.007	1014.59
201039_s_at	79.9116	66.492	127.862	61.3315	47.1678	51.3553	37.3787	26.9814	89.178	66.3661	38.8481	32.3208	26.0793	27.8334	38.6986	32.8566	30.5768	28.8665	34.5991	100.358	81.6334	97.7865	52.308	208.504	117.904	45.8211	98.3064	68.1974	79.1952	2363.12	1844.58	2094.73	2067.68	4287.6	1628.85	3286.52	1738.69	3624.12	2860.81	2526.64	1104.05	792.187	3679.8	3102.49	2566.71	3694.87	1209.1	1054.93	24.6329
201040_at	698.83	511.973	342.761	374.08	613.015	467.629	430.541	460.108	518.971	295.299	577.379	589.833	498.811	494.539	849.803	277.398	189.314	365.217	487.578	364.322	244.305	205.305	643.16	320.332	419.946	525.475	426.41	413.306	440.215	54.0289	297.087	66.8701	158.792	36.4358	61.5107	65.9824	57.8322	84.5128	67.1595	165.239	86.8572	113.236	64.5701	119.087	111.327	120.927	212.567	163.719	1784.54
201041_s_at	337.74	267.689	295.425	231.019	315.916	566.413	150.693	118.678	75.2662	195.165	657.449	590.012	488.669	489.468	770.623	40.0009	21.0631	170.259	201.521	67.6554	104.438	69.2253	165.69	151.799	99.5727	234.128	148.154	117.785	398.697	95.0202	33.0455	117.424	35.5546	36.3438	84.2303	44.693	64.4476	19.7439	60.9551	38.9327	39.2461	91.0674	266.983	20.0014	41.7333	65.495	125.997	77.5962	514.75
201042_at	28.1901	31.6536	28.7668	31.2537	36.2076	31.6586	26.0855	25.8176	19.1899	27.5572	29.9947	31.0915	28.9613	30.1781	35.6462	27.4018	21.2932	29.4281	31.7227	41.9195	48.1843	53.3188	32.7934	35.8356	46.664	28.9191	50.6625	45.2292	47.4884	334.132	74.1428	546.174	108.184	609.282	148.122	124.462	592.384	191.62	328.454	192.026	56.1713	128.98	56.5625	115.877	274.766	70.7035	58.458	56.6764	22.7447
201043_s_at	259.129	226.056	253.44	188.203	199.813	179.135	168.269	236.755	132.685	154.775	276.067	173.496	172.09	126.891	150.297	270.769	253.507	57.5834	56.5612	187.739	221.878	177.02	110.665	380.093	264.131	262.216	412.371	301.136	116.052	79.8608	62.6324	34.6349	68.1098	25.6607	64.3136	64.9535	44.5149	235.774	61.3442	159.556	82.3444	167.993	158.2	58.2718	71.9272	49.0801	29.4718	71.725	55.8489
201044_x_at	33.0424	33.8635	31.3613	31.6761	27.8079	26.5984	26.9055	25.6288	21.3794	26.719	27.8268	28.4187	31.4277	26.8348	27.7935	28.2779	29.2721	20.7755	26.4193	32.226	30.8659	24.5779	28.6785	29.524	27.7501	30.5451	31.084	33.7605	24.5412	22.9006	35.7367	25.4068	26.8595	25.1187	25.5969	26.1616	30.0129	43.8655	33.1659	40.613	23.248	27.7257	26.6238	36.85	23.9666	28.9344	26.733	22.4375	29.9185
201045_s_at	25.1729	22.5487	22.8231	24.4418	23.4267	24.6187	26.0412	17.9271	38.648	19.702	17.5586	20.2097	23.7707	17.4097	22.9569	22.7816	20.1838	27.2236	24.893	22.8923	23.222	21.8537	19.4716	28.0729	20.172	25.5285	41.5358	28.2756	24.3698	25.2635	22.3697	26.6413	20.3249	33.6335	29.8063	25.8497	25.194	19.7961	28.7119	21.0109	19.0272	25.3429	25.5306	26.2038	30.7749	19.3064	22.9084	26.3503	28.5897
201046_s_at	83.0077	123.551	91.5273	98.7802	64.8839	82.5078	52.5984	54.2258	63.4835	42.6385	42.2641	48.1695	40.3617	60.1414	52.4777	65.5046	40.2123	42.197	36.8455	92.8283	85.2715	125.465	82.4742	77.7125	158.468	57.5717	83.1893	57.174	78.364	941.731	523.844	820.79	745.316	1504.59	707.462	1257.11	787.953	662.516	938.055	662.575	272.576	932.972	637.406	813.786	885.884	480.572	310.874	205.911	30.0943
201047_x_at	1550.52	1427.8	1873.44	1597.42	1822.71	1571.73	2055.59	2502.34	2656.17	1017.83	1130.29	1529.64	2187.68	1244.64	1778.87	2526.04	2691.65	1889.78	1966.7	1897.24	2357.98	2518.01	55.5378	3290.07	3326.66	2122.47	2840.69	2551.68	3436.46	3734.92	4152.63	3410.62	3396.83	4173.69	2095.5	5083.85	3506.56	5605.22	3719.88	4949.29	2030.55	1981.83	4562.26	4410.64	3609.7	5393.07	2046.1	2362.77	1973.36
201048_x_at	69.4851	54.6692	48.2337	54.961	85.995	59.1785	52.4215	47.8254	19.7909	27.003	27.1168	52.6743	112.149	39.5844	63.9492	49.7	30.7741	41.9387	50.8743	26.6345	30.2731	24.6122	26.5839	51.764	24.4791	27.5071	68.7444	36.9417	40.4493	19.3235	31.4249	25.9175	31.1673	28.2015	40.6404	32.018	27.8656	34.8742	27.2497	35.8745	24.5462	23.5634	22.247	26.9393	30.7509	27.9047	38.4675	25.7205	31.6765
201049_s_at	3038.76	2638.62	3741.37	2234.09	1796.01	3236.1	6866.65	4547.28	4350.62	3735.18	2340.75	2213.9	3225.77	1587.8	2003.76	8299.78	8460.9	5042.93	2681.04	3058.02	4053.05	4320.41	1155	3843.63	8730.77	5211.64	2531	2793.16	2089.76	566.551	426.194	651.297	654.411	153.905	520.898	160.652	184.466	218.977	268.446	1997.93	483.235	1543.48	1191.66	175.59	310.088	479.209	768.289	512.676	2619.72
201050_at	26.1859	25.9553	25.0662	22.203	30.1889	29.3926	25.4833	22.9507	25.2944	22.2372	18.8809	22.9419	23.9061	24.2437	25.3155	25.469	22.4508	26.8889	23.9072	29.1287	27.7047	27.0957	23.2331	24.9096	23.228	29.1167	22.7228	25.9085	20.6302	22.257	22.8703	25.0571	23.7846	26.1003	25.6684	23.6984	26.5127	26.0867	25.0285	26.8394	26.8932	26.1198	24.8718	24.5338	22.2764	23.4481	24.3666	25.1955	26.5162
201051_at	3037.79	2589.84	2901.32	1759.46	2249.69	2002.5	3831.69	3204.33	4703.67	1409.69	2007.58	2077.1	3221.15	1389.8	2071.06	5934.56	4899.42	4600.51	2940.32	2212.73	2625.82	2570.91	1977.88	5097.1	6157.13	3659.03	2507.24	2938.76	1932.59	574.58	61.1788	846.659	285.191	125.687	564.704	381.052	135.064	58.2284	305.899	2081.37	590.65	618.415	1391.01	46.1825	385.719	281.204	981.889	487.046	3382.73
201052_s_at	112.848	102.96	88.3336	97.5362	109.903	152.45	105.603	69.5718	58.3684	36.3766	42.5754	81.2483	118.646	65.3241	132.06	132.332	56.7207	101.506	70.3948	201.701	355.809	360.716	143.616	221.342	209.489	269.91	322.088	332.441	278.155	1569.21	2413.33	1380.6	1745	2226.07	505.448	2392.25	1447.68	2563.29	1485.26	2343.56	680.518	762.038	1269.98	1609.48	1401.2	1091.98	454.082	370.86	57.7265
201053_s_at	740.659	517.226	509.086	454.599	608.07	684.66	1163.66	993.566	1364.34	390.964	571.853	616.452	775.412	367.661	885.793	1128.01	816.333	821.89	866.985	1230.64	1083.22	1233.99	120.862	1203.48	1410.83	1096.42	1216.07	1255.57	1906.95	3549.75	4190.53	2821.13	3066.4	4082.58	1361.47	4525.39	3306.17	6110.46	3464.33	5893.94	1987.52	1616.3	6581.61	3760.3	3465.99	5217.32	1448.97	1573.69	430.743
201054_at	880.374	1063.15	897.423	779.093	661.065	671.585	2445.96	2089.28	2995.66	330.463	825.859	1006.61	1499.99	815.972	1015.71	3128.43	2892.43	2497.29	2033.86	1209.84	2161.08	1520.74	649.826	2149.7	3246.61	2141.46	1448.83	1938.84	1304.19	307.145	48.4418	294.71	39.3189	24.388	380	65.1039	132.747	29.3283	141.089	547.195	224.316	301.725	1125.72	17.3653	100.245	43.926	438.191	253.062	1466.28
201055_s_at	76.9875	64.1182	36.968	64.0061	88.3177	87.8037	99.2245	67.6041	41.628	49.0491	24.4049	60.6018	119.96	43.4777	105.965	98.3162	36.2215	146.93	96.9879	36.0386	91.8703	70.1258	74.7217	142.835	57.733	126.809	107.496	106.154	149.088	51.3323	21.3005	103.781	22.1649	36.4729	59.4799	25.2926	32.8511	10.2695	38.4371	43.9407	32.718	97.1603	86.4623	20.2686	48.9064	15.6425	39.6895	58.3	107.022
201056_at	63.3335	66.7679	57.2764	60.1422	74.1136	73.4358	63.9808	52.6953	52.917	45.2108	48.0181	54.8158	51.96	54.9674	65.8328	71.3244	57.0258	74.4098	72.8206	75.5391	59.0745	88.6433	51.5562	63.8332	66.9078	77.1379	71.3454	63.04	61.5234	58.1135	73.4702	63.752	56.346	49.1575	57.9545	49.5321	47.7574	46.4151	47.8694	47.3871	66.2282	57.7384	51.9028	51.7615	50.272	69.93	48.6437	56.6371	59.7033
201057_s_at	43.0495	54.2582	32.0053	45.7659	50.376	47.9525	38.7165	27.9672	26.7898	23.1307	17.6621	32.1309	50.8147	26.4843	44.8408	57.7917	22.3269	83.2568	41.7335	57.1114	80.1754	80.0864	35.6098	109.887	56.7672	93.9061	108.187	87.2896	56.4515	79.3235	30.9429	50.9187	32.2642	43.2468	40.2762	31.9125	43.0268	23.719	25.9411	36.5346	27.1545	42.0502	35.4218	29.331	52.1841	22.8405	33.4656	49.3807	102.128
201058_s_at	105.747	79.2774	103.499	135.945	142.326	118.623	188.484	162.706	76.2291	210.159	246.78	172.828	142.735	187.181	135.318	188.198	324.597	149.107	169.266	289.498	184.084	200.961	221.223	171.557	308.165	327.657	142.488	161.753	201.171	193.275	166.367	124.754	235.107	140.041	127.906	180.809	199.215	431	138.058	251.236	305.522	115.201	138.546	203.067	235.082	222.015	215.289	179.456	169.519
201059_at	36.9671	34.8844	114.445	126.74	125.968	120.771	174.246	157.226	114.342	124.349	104.94	140.146	154.134	136.274	175.013	192.222	146.775	224.036	168.55	139.566	161.866	248.364	278.258	1436.4	770.053	1796.93	1389.12	375.306	1102.83	1026.84	367.417	2146.37	361.485	2752.62	949.497	486.513	1077.28	584.953	521.435	128.09	721.72	1581.93	375.941	1464.99	820.926	260.592	633.672	962.537	373.022
201060_x_at	978.94	461.893	299.565	558.91	2023.55	295.473	1402.39	1114.99	2154.58	900.429	540.339	734.102	772.752	447.056	1555.81	1983.19	1395.26	1366.99	1715.63	1598.83	1755.49	2480.22	3480.84	6075.2	4493.17	3699.34	4971.56	4962.75	4018.2	7438.43	6099.95	7277.77	5866.43	7448.7	5118.92	7686.43	6003.33	9130.27	6441.36	5977.68	6038.24	4493.1	6709.51	6886.04	6731.85	5769.83	4734.28	5934.26	2690.86
201061_s_at	742.683	442.612	226.636	678.274	1891.07	272.906	1463.1	792.778	2455.64	824.436	477.142	716.344	835.87	393.537	1677.71	1719.26	1191.39	1190.49	2379.79	2401.8	1773.2	2720.21	5625.91	9892.02	6982.45	5711.43	7772.75	6855.19	5744.88	13676	12988.7	13188.5	11687.9	14451.7	9725.4	16074.1	12295.2	18605.8	12097.1	15516.1	10248.9	8413.16	14702.7	14790.7	12031	15550.7	7247.81	8749.38	2898.14
201062_at	31.797	31.8241	35.0493	31.7559	25.1012	25.2694	30.1404	23.4177	47.5392	29.7506	34.4336	27.7491	24.2601	27.7214	25.6038	25.7074	28.4333	20.9687	19.6783	37.6193	34.5837	38.0992	25.0704	29.1735	52.4515	33.1403	37.1413	41.1195	30.1185	51.4756	48.5549	58.8514	40.6382	50.3708	43.5739	59	71.5065	150.565	53.5868	63.6581	34.0784	49.9026	44.9543	45.8859	49.3706	41.7755	41.5942	56.1607	30.4449
201063_at	442.956	475.886	267.905	243.525	335.502	426.018	1248.98	1148.96	1807.4	292.166	274.737	393.24	554.156	338.849	463.527	1895	1534.09	1931.52	1754.09	1580.65	1295.67	1187.77	149.453	739.379	983.975	963.785	980.984	1147.49	1436.43	120.704	44.649	45.7024	59.702	24.6613	103.783	123.19	63.1654	51.9991	188.497	512.974	120.735	206.607	1933.01	44.2774	166.246	63.6916	114.816	99.5256	871.875
201064_s_at	90.1458	79.2292	34.6008	78.5137	57.0283	136.573	121.907	121.221	63.5727	68.1819	30.5263	61.816	112.061	56.6522	75.3458	188.615	59.3613	202.795	78.0241	73.3443	270.233	178.002	69.5734	183.522	147.404	123.746	146.773	185.557	205.812	29.2435	30.2065	40.8386	22.8444	14.2287	50.1363	27.5459	25.5474	16.4679	35.9292	25.9444	20.1041	128.617	40.5954	21.766	21.6231	14.7951	38.3464	58.8565	137.56
201065_s_at	1360.78	1538.41	1772.36	1698.44	1609.69	1594.06	1533.63	1759.81	2795.47	612.362	1419.5	1440.15	1995.41	950.524	1597.73	1841.74	1595.14	1912.38	1611.8	2313	2003.4	2124.06	609.758	1961.46	1966.72	1487.22	2413.23	2125.92	2661.64	2845.58	2344.97	2271.68	2678.71	2963.54	1555.21	3656.92	2487.52	4210.76	3327.45	3631.82	2301.43	1019.43	2228.87	3013.7	2921.86	2887.43	1790.66	1659.76	1655.28
201066_at	39.0793	26.2643	38.3257	33.0967	37.0399	35.9309	33.0066	31.7323	36.0885	24.5627	25.3966	30.5922	31.8808	31.1092	34.7735	48.7915	22.2252	43.5579	40.6357	34.8837	55.0673	69.0997	57.2736	38.6079	50.4758	51.1415	38.9023	42.1178	47.0862	38.4868	39.6047	59.8735	30.3212	45.9023	40.8702	34.3445	35.1415	28.0052	32.1339	26.2278	37.2949	95.4134	37.2031	39.7322	27.207	31.6746	32.7215	26.3452	31.6461
201067_at	38.519	43.2558	22.0726	37.9871	42.9158	45.1887	61.7201	22.8681	18.1471	12.8164	16.3166	29.5437	65.899	25.7284	27.5384	27.485	10.7728	47.3454	21.609	29.7373	19.3769	44.5907	15.044	29.6054	41.2382	36.6293	46.7974	33.3392	26.8503	18.0107	16.4657	19.0182	17.5353	10.7182	20.9597	19.4283	16.8615	15.4189	10.7762	29.2716	24.7974	42.7174	11.4807	15.0837	7.61542	6.92566	14.1056	8.63953	365.397
201068_s_at	249.863	307.397	166.013	255.432	256.256	403.506	409.292	467.607	423.223	337.563	368.302	439.183	667.664	313.933	481.928	634.827	167.696	495.667	361.847	284.261	283.634	327.899	83.9671	925.452	561.403	606.651	494.924	442.744	428.377	467.469	75.7046	927.063	88.1868	139.77	329.633	120.163	78.1582	118.461	108.653	144.329	183.419	589.591	78.7472	61.5923	57.1687	37.6937	184.858	247.856	532.09
201069_at	32.363	28.8355	23.1794	23.1727	29.4181	28.5905	82.0955	47.6347	24.6892	25.334	29.634	30.2337	31.3112	31.3818	28.6944	74.9193	29.0075	43.9891	40.4613	71.9786	78.0541	27.6683	36.7343	33.7755	31.9732	50.2211	25.394	30.2815	35.0462	33.1264	33.4024	31.8858	29.1417	30.7346	29.9724	42.3394	42.6311	25.1855	35.5632	54.4249	32.1234	34.1808	29.6675	31.6333	32.1697	29.2837	32.7405	30.2456	66.6513
201070_x_at	152.524	115.272	139.097	263.377	163.069	338.289	124.01	93.2266	120.37	355.646	133.723	194.045	302.59	134.978	259.589	68.0623	33.1009	360.698	98.1257	175.807	80.0424	81.808	59.6664	269.478	144.19	320.54	190.077	203.618	102.541	184.042	42.0352	90.6609	33.455	38.0838	195.694	50.7936	85.3695	43.8537	52.7396	65.4568	113.967	62.6424	36.1552	65.1139	89.9758	23.2153	208.78	81.7798	260.191
201071_x_at	559.621	434.844	440.037	519.181	644.968	782.357	760.133	720.028	1041.95	1198.08	551.267	550.886	900.459	278.129	667.075	959.089	615.972	1384.94	433.456	703.501	367.909	575.625	76.9489	1188.88	975.259	579.846	657.673	667.4	702.128	208.683	50.0308	347.052	182.947	202.19	392.425	67.8923	295.274	268.533	308.282	508.387	377.768	231.259	143.589	292.05	197.102	41.0587	489.185	304.398	941.566
201072_s_at	138.351	115.946	77.1647	110.083	77.7994	126.933	110.061	33.5721	84.7542	39.3122	36.3047	61.8349	131.969	38.6974	78.8529	120.43	42.3221	288.709	48.77	197.067	119.628	120.895	769.734	217.506	100.104	204.052	239.575	164.746	267.618	29.5209	22.1811	21.9094	17.6068	22.2924	58.9457	30.7587	50.3218	33.6739	31.8695	69.9427	33.2775	36.2154	30.7426	11.9645	67.0011	8.59181	19.764	21.1079	473.55
201073_s_at	72.9369	71.7145	36.4148	68.8612	71.8627	118.715	66.3738	46.8762	34.0546	29.1036	41.1743	61.436	58.9055	59.9893	97.912	103.359	30.4079	104.154	62.4498	61.9757	71.873	89.5784	61.5852	79.551	73.2361	67.8678	167.496	121.978	115.368	92.127	59.2011	53.4875	60.754	80.4697	58.8093	68.4236	49.1143	43.4412	71.7671	29.268	28.0602	64.6141	90.6784	58.4988	82.8495	45.0427	59.5639	56.0007	76.0102
201074_at	377.608	642.984	328.991	366.807	330.843	771.526	1065.9	859.903	1544.36	270.034	371.6	373.972	585.818	248.505	361.564	1334.69	1129.68	1019.92	522.278	687.888	654.136	764.02	445.719	921.908	1201.13	688.959	700.73	696.242	822.773	330.057	50.115	309.763	59.5262	100.985	121.396	89.2147	180.006	69.0586	100.633	344.448	96.0748	200.344	27.5228	38.6472	308.933	86.7623	178.994	140.955	776.271
201075_s_at	66.9788	80.6465	36.9192	60.4551	58.2285	118.37	64.6552	41.4028	39.7512	11.7509	17.5027	43.613	99.7284	32.6935	63.3983	147.733	33.125	200.235	58.0492	90.5774	130.823	140.548	37.6326	188.439	86.6106	115.29	177.814	177.298	101.512	59.4449	22.4197	46.3091	14.7348	21.2925	35.1836	24.5325	30.0635	11.6274	30.7373	45.3066	11.5151	49.2894	21.1163	20.4136	53.7247	10.7161	20.4031	35.3132	100.276
201076_at	395.546	435.732	408.102	243.273	482.843	446.353	839.703	665.636	1010.71	253.749	294.933	362.411	724.547	173.808	464.46	1372.01	742.31	1155.47	589.329	876.103	703.123	897.431	118.202	1049.67	1120.2	834.565	854.981	865.934	1293.48	313.963	68.4065	330.102	85.3801	130.364	140.994	147.475	200.881	57.1834	256.944	309.076	126.819	205.667	301.542	50.887	225.609	29.2759	299.509	122.931	970.614
201077_s_at	302.716	151.517	107.043	129.091	118.327	468.109	459.363	265.96	327.74	201.481	89.2937	185.976	369.207	124.184	292.194	984.292	415.399	676.413	376.136	407.961	615.887	688.789	105.992	620.565	829.265	890.475	449.813	441.846	478.913	121.965	68.1972	175.978	69.5999	48.1346	124.279	66.1061	62.7883	41.405	81.8907	112.24	32.233	658.087	80.0561	43.253	30.6486	26.1384	97.581	112.32	340.953
201078_at	147.884	281.598	146.665	192.718	265.328	307.572	217.667	178.04	126.312	83.0617	244.078	329.467	333.394	323.362	447.787	181.433	62.9037	297.762	193.112	118.747	134.396	143.905	95.3168	481.113	170.879	307.012	279.837	325.306	228.019	92.1715	27.665	224.049	23.0295	71.0691	138.553	45.9282	85.5203	31.521	65.0082	45.7427	41.4388	132.496	36.5376	70.3747	57.0549	17.0487	105.331	95.3114	501.199
201079_at	457.702	171.602	151.195	154.54	183.474	365.263	179.971	96.4326	138.859	38.8809	81.1485	166.489	288.892	118.669	276.182	117.751	24.5804	110.498	91.2427	134.447	143.242	137.843	35.589	255.904	142.655	328.363	184.804	217.479	211.268	88.084	32.234	145.927	20.7283	19.179	70.6073	50.1075	164.367	37.2483	37.876	65.9089	23.8408	114.674	29.5599	71.9436	34.2259	33.7797	43.1383	93.6694	377.975
201080_at	40.0001	37.5232	32.7084	33.9575	33.7901	56.0387	33.8724	17.1265	26.2999	12.6612	18.3883	25.341	41.759	14.6395	36.684	79.9906	19.8024	94.3091	34.9511	62.7898	87.5291	97.3193	32.4118	62.8936	61.1163	104.763	137.171	90.2765	63.8098	23.0219	17.955	23.0494	14.3221	12.5279	16.3843	20.3983	18.1176	25.2061	20.2297	35.2878	14.9939	18.7268	21.8176	24.3204	23.4318	14.221	17.9547	25.4686	21.8559
201081_s_at	53.7887	60.5974	70.3031	78.9993	72.8355	71.2799	53.7404	63.4779	38.2732	52.2854	51.96	72.3521	76.0826	68.4825	101.221	57.4115	48.7106	70.6814	59.9562	63.4274	82.4481	67.0641	61.8731	87.0316	50.2978	71.1723	74.1819	72.0587	89.1084	56.3589	53.8909	64.2766	57.0681	62.6238	55.9163	73.9926	69.1065	45.5576	71.5939	75.7104	38.5264	69.368	69.3051	67.058	67.9768	52.9811	71.6	55.9644	66.2849
201082_s_at	41.8124	42.437	35.0386	43.6886	36.4986	46.1085	32.2609	26.0248	56.2197	24.1597	34.6614	28.8594	30.885	22.2612	29.1077	44.6474	30.8025	36.0556	30.3599	45.385	45.0301	39.5364	25.183	36.8591	58.236	59.9176	38.7969	37.9182	36.7099	35.3027	29.8975	32.262	27.5644	31.3453	33.5575	31.0846	35.7095	42.7768	30.9142	48.8527	24.058	40.83	26.1289	27.6814	28.5953	26.4626	24.7326	33.7861	44.8528
201083_s_at	499.92	286.432	239.493	335.12	352.844	462.896	531.106	563.547	773.166	646.214	435.783	364.466	419.137	288.445	334.919	450.578	212.953	649.508	534.661	317.393	170.722	202.993	58.0787	772.781	303.91	346.429	503.879	390.301	797.179	211.508	36.1962	232.175	18.9936	44.4601	188.781	43.0028	69.2265	34.7981	35.7559	117.963	82.7744	103.087	61.5941	44.0774	150.846	34.388	125.072	159.897	1116.22
201084_s_at	285.6	290.91	157.66	244.104	262.112	503.55	384.508	455.762	431.825	234.727	252.455	301.287	463.519	193.611	363.698	746.171	409.081	793.801	393.724	336.435	347.106	411.454	180.926	746.642	549.066	449.901	507.224	508.839	653.629	142.136	54.4808	182.896	29.937	24.3782	139.323	47.532	41.4854	16.9846	31.0626	119.177	89.395	272.997	78.4431	37.3255	200.761	78.5072	46.0196	78.2235	252.06
201085_s_at	290.964	178.069	185.033	227.003	280.94	331.902	156.269	60.9814	181.983	121.267	260.467	248.093	357.173	114.147	356.747	224.199	64.1708	346.134	136.824	438.647	215.782	216.376	80.0043	311.463	264.872	464.569	329.764	418.723	169.98	483.071	117.484	640.519	121.492	267.035	222.102	104.222	267.808	254.13	170.314	264.266	265.412	260.049	61.7168	388.558	207.065	36.5278	133.757	150.947	338.157
201086_x_at	1145.52	954.49	1128.36	926.763	1154.08	1066.42	1551.48	882.744	2007.14	576.841	985.764	1026.2	1496.02	639.62	1175.68	1610.69	1192.36	1089.07	1174.73	1260.72	917.086	1102.59	283.159	1543.57	1911.87	1277.24	1257.24	1133.8	1386.61	929.877	491.698	1069.77	824.684	740.491	790.015	653.62	572.37	1450.37	757.869	1022.93	1041.35	825.057	832.118	984.761	730.544	870.723	815.25	617.871	1308.76
201087_at	23.3736	24.4886	23.8563	26.1536	27.5117	24.751	11.1483	9.48973	6.16629	8.6553	11.0413	16.267	21.5084	10.042	29.3621	9.67724	7.30243	11.104	10.1696	12.7591	11.7767	11.9624	12.4035	26.4958	12.1997	27.7418	12.3135	26.5738	18.1408	10.5472	9.47365	13.1412	8.36712	13.2992	12.0313	10.459	10.532	8.07099	9.54392	9.90998	11.3431	10.2917	13.1541	12.172	13.8311	10.865	16.0297	11.3233	18.7268
201088_at	123.826	87.9463	34.4828	54.8124	83.2573	99.1049	154.206	97.7984	101.926	57.8315	25.2398	77.9445	187.58	50.8219	153.397	177.506	29.2622	65.0722	102.878	67.8194	87.4336	76.499	58.4192	108.149	67.93	171.148	91.7439	145.897	131.12	80.8731	22.8135	116.046	26.6785	29.3297	106.483	43.7304	21.8385	11.3056	25.4788	29.7785	45.8071	207.524	347.916	16.3695	23.3184	18.8134	23.1853	16.8872	445.757
201089_at	310.05	335.419	203.456	309.133	574.449	290.721	425.849	465.5	377.139	145.645	384.826	608.866	733.461	530.691	917.496	325.578	140.297	543.629	433.367	255.089	247.972	249.138	617.609	833.205	576.395	928.903	567.174	521.163	973.45	380.818	102.094	545.35	111.481	316.296	413.129	93.6751	269.798	116.575	239.535	166.664	171.949	371.313	303.056	136.314	179.585	74.1992	431.502	401.158	1085.44
201090_x_at	842.46	638.452	444.048	407.464	691.236	458.764	3231.42	3100.25	3263.26	536.206	646.057	883.895	1104.87	783.141	1091.9	5629.23	3078.14	2123.92	2497.47	2194.65	3142.95	3224.18	4733.12	3285.91	5802.63	3449.32	2712	2360.76	2178.15	1563.38	677.16	3235.74	683.938	535.288	1776.64	1538.84	285.171	626.974	808.614	2108.15	1654.87	3275.51	1983.99	539.064	431.633	1085.63	999.429	1172.4	1908.58
201091_s_at	716.321	468.082	686.24	545.161	557.576	900.593	1671.37	1158.38	1675.44	989.055	762.678	679.687	870.102	465.143	691.413	2166.22	1784.4	1390.9	995.396	1257.99	988.965	1581	686.154	1934.81	2312.38	1170.3	1700.09	1429.53	1991.91	838.878	466.428	1184.02	660.029	322.395	797.228	863.329	582.33	741.054	501.519	1037.99	774.057	868.92	272.167	457.711	772.447	580.027	787.576	435.49	727.439
201092_at	342.113	218.376	100.286	152.17	166.065	287.057	345.339	310.334	448.056	240.628	139.743	206.261	388.684	152.156	219.003	723.991	261.107	722.766	425.495	331.758	361.561	355.328	154.184	600.102	433.74	546.71	461.938	425.906	564.768	80.9607	47.6722	311.099	38.3073	20.6239	180.217	69.1851	45.7457	34.0763	65.9619	118.923	91.3578	393.613	44.7358	32.87	40.311	25.0231	31.6392	128.696	486.21
201093_x_at	93.1329	154.183	96.2436	108.087	87.6673	243.973	96.7081	91.9071	88.0036	71.0026	41.7236	91.0786	203.779	58.3738	138.646	198.911	74.3852	299.811	201.225	237.869	261.897	233.557	111.409	267.16	203.336	307.834	312.101	368.3	405.561	188.293	77.9405	230.642	51.54	191.493	85.7262	65.4131	90.2051	52.7372	121.695	84.8011	49.0035	283.847	71.9637	163.225	129.965	23.9696	73.9502	83.0576	144.299
201094_at	5825.08	4883	5551.78	4130.21	4614.35	3464.73	7593.18	5983.58	5324.73	5554.15	2435.76	3380.41	5168.47	2585.19	4012.24	6405.47	6102.57	5223.59	4735.51	4129.54	5348.55	4844.91	3048.97	5258.04	6271.6	5421.43	4281.05	4913.34	3372.69	1826.92	1277.31	2208.57	2264.16	1751.23	2021.26	2759.08	1310.22	2450.69	1996.54	4587.78	2658.84	2861.17	3687.49	1750.62	2068.11	3662.65	2745	3339.33	6136.32
201095_at	29.9048	41.5269	37.4438	45.7267	56.0805	57.0037	29.9644	20.2494	17.7053	20.3301	20.8944	27.5627	29.225	24.356	38.8058	34.7912	17.6785	32.9008	18.5845	51.7956	46.066	57.5042	24.1804	39.2654	41.8322	51.1459	80.4628	59.8613	42.4728	180.575	78.1946	187.871	73.0149	378.309	40.8111	80.7906	222.115	72.9875	106.756	81.8493	22.3485	81.6485	121.818	42.9518	114.813	40.0231	39.7337	41.6751	29.69
201096_s_at	474.559	297.306	352.65	269.548	437.51	424.907	1027.5	1306.71	825.99	205.721	275.53	490.062	706.806	407.092	727.518	947.461	909.309	795.709	631.276	790.051	1319.57	1445.16	100.54	2487	1645.49	1029.59	2120.46	1967.96	2237.08	5249.33	4983.97	5157.77	3733.87	6054.63	2691.73	4689.38	5259.14	9076.28	3987.55	5292.46	2897.09	2798.95	4872.28	5808.79	4682.43	3969.51	2257.08	2142.05	676.296
201097_s_at	646.919	452.165	394.14	522.141	612.221	658.079	1221.22	1393.69	1235.3	267.758	427.431	607.399	957.003	411.236	809.141	1100.12	910.799	812.467	620.736	793.835	988.6	1300.29	686.871	1447.01	1492.46	938.933	1606.76	1533.89	1778.85	2166.47	2087.33	2399.62	1988.98	2747.77	1658.96	2150.83	1813.1	4356.96	2055.53	1945.6	1790.31	1332.15	1257.14	2443.11	2065.97	1176.52	1767.81	1309.22	871.57
201098_at	122.995	149.254	155.061	140.869	91.1204	146.922	196.819	196.249	233.11	117.061	93.8047	129.55	219.8	93.5046	146.105	221.694	103.226	221.904	108.253	141.375	203.365	304.158	80.3921	456.088	305.163	306.284	349.226	399.167	188.683	209.412	111.423	536.103	141.655	204.134	294.153	105.357	190.847	180.766	146.101	145.682	146.637	485.548	66.1554	146.479	260.004	33.4963	110.625	114.691	211.06
201099_at	574.104	599.675	437.403	520.872	720.964	854.292	1355.62	823.246	1490.52	1109.28	648.46	750.359	1069.73	412.332	1108.34	1162.67	879.019	843.92	982.858	1313.22	832.34	1053.92	65.9574	1282.92	1366.22	1165.2	1193.62	1064.44	1891.11	2928.5	2559.8	2629.58	2541.61	2780.33	1686.22	3741.36	2228.21	5395.38	2498.58	2938.71	2448.45	1590.69	2335.5	3888.45	2549.15	2419.02	1676.97	1237.81	902.87
201100_s_at	481.921	641.005	574.339	629.017	653.042	1004.08	1154.34	868.624	949.456	1139.63	886.476	811.066	956.41	577.796	883.362	768.508	582.385	686.787	600.871	1589.38	988.439	879.765	358.513	760.786	961.144	879.318	1127.77	885.207	1097.45	2409.52	2415.9	2187.56	2639.55	2470.03	1245.36	3423.24	1973.18	4684.44	2585.65	3674.29	1771.25	1279.96	2945.06	3033.66	2262.35	2878.96	1174.36	1098.02	1191.52
201101_s_at	133.338	98.4413	71.6355	115.354	132.81	317.454	145.123	90.1378	143.856	194.618	85.2067	138.895	192.743	101.32	223.666	210.207	65.671	319.076	119.653	94.7571	142.923	147.255	39.453	252.517	123.874	241.43	253.917	222.741	206.522	54.8622	23.5709	57.4054	31.8693	27.302	106.26	45.9443	40.8431	30.547	28.7251	39.7859	43.4086	111.65	33.2089	36.1974	36.0544	17.0909	45.667	57.1385	320.018
201102_s_at	29.9443	33.0282	27.5452	34.8385	37.7519	42.7896	25.2615	23.0476	11.8781	19.5759	19.9469	26.3977	35.8787	23.1899	29.2588	28.2499	18.5136	27.022	23.8154	22.2472	24.5605	25.9053	22.2164	29.7332	23.5713	30.5311	39.7235	30.2517	32.535	29.5953	25.792	29.9626	23.6179	33.8037	28.9401	30.3741	25.9065	17.9999	28.1264	18.4895	18.5968	37.4986	27.0363	25.4762	32.0099	18.8591	27.8078	31.0292	38.7145
201103_x_at	631.3	777.683	542.633	849.59	805.433	1004.09	1142.91	991.911	1206.93	1736	854.814	862.224	1158.32	609.408	915.947	1292.04	726.144	1243.36	813.951	572.205	505.537	577.671	375.087	952.407	1028.64	898.084	715.555	628.59	742.528	114.572	33.8008	64.867	54.3218	20.9254	68.3864	56.0005	34.3203	10.0988	33.7057	171.52	57.4823	92.2273	135.02	47.286	108.036	79.8847	225.942	214.562	1533.37
201104_x_at	50.0516	58.3476	34.6603	99.7764	58.3792	118.91	31.2722	54.3276	25.7007	52.3169	26.8436	65.7992	97.9644	71.7674	99.3222	70.8248	19.2258	150.749	66.5269	24.874	59.0463	60.3898	21.7992	109.655	39.8462	91.7019	146.228	155.581	72.2789	17.5839	15.3446	21.0099	14.5699	12.3356	19.1184	14.1767	13.8225	11.0709	13.709	15.8886	19.8973	15.5828	18.8624	25.5658	25.0886	10.7107	32.8267	69.7823	47.5736
201105_at	323.277	422.303	50.5223	141.157	185.302	97.5001	553.478	742.634	297.931	66.6731	87.1733	205.349	297.58	173.796	394.402	47.886	32.2577	142.159	320.519	162.226	108.058	79.5387	42.8419	139.716	93.0566	388.117	140.019	88.9611	79.8861	43.5377	38.1543	75.2089	19.6726	31.8981	36.3762	45.3725	43.3722	19.7394	42.843	87.4196	43.8168	40.228	255.118	33.5328	40.7176	20.401	48.1318	86.4461	320.333
201106_at	192.569	200.904	166.417	137.652	143.521	214.373	305.717	204.353	297.884	229.101	111.692	135.184	109.753	148.89	182.978	331.111	154.996	263.693	134.921	321.202	525.638	595.416	256.067	273.355	262.987	401.559	454.195	425.11	205.877	331.658	292.671	423.693	315.562	440.72	73.5269	112.321	454.947	213.025	314.499	366.622	125.24	282.326	107.92	284.898	418.975	357.767	58.4781	84.9707	224.185
201107_s_at	23.6379	26.5384	29.4742	25.494	26.2554	27.0924	48.158	42.5064	67.8229	32.459	31.6839	37.0061	35.8352	36.1187	45.731	43.5411	42.674	40.4144	47.4534	37.4346	39.8931	39.7464	44.9936	50.6116	37.589	52.6648	52.4273	40.9601	41.5347	47.1521	41.7446	42.37	38.1989	47.6107	42.2766	34.9145	37.493	42.4052	35.4862	34.575	50.8517	36.8266	37.945	39.8987	40.1779	47.1062	38.8762	40.9224	39.9794
201108_s_at	65.5235	79.8284	149.291	225.348	230.976	192.763	365.419	202.914	267.787	165.088	223.195	282.238	284.614	238.374	419.044	269.216	249.006	288.257	313.688	270.411	450.718	347.486	491.554	1458.65	586.087	1210.45	2543.99	369.766	871.466	284.784	323.921	345.851	259.521	317.563	271.41	334.97	267.623	209.737	329.729	310.13	202.741	257.601	331.838	277.441	338.725	240.003	352.351	247.154	351.716
201109_s_at	37.6165	41.2523	67.7511	60.8134	75.3374	67.6911	79.3305	93.3319	60.8772	48.42	56.5058	68.0609	60.1013	65.173	96.9498	99.2461	77.2053	86.4777	81.7352	82.5785	75.8613	91.983	137.964	461.996	93.0112	187.684	925.156	182.156	207.627	90.1654	97.0812	73.7344	151.956	84.1128	74.5844	108.948	87.0259	93.4413	109.82	86.4945	64.1598	78.4789	154.691	111.767	95.5096	82.2904	166.965	136.348	95.4469
201110_s_at	123.199	61.7187	221.859	174.636	310.991	180.247	231.663	27.1189	82.8085	39.6384	52.7167	164.611	235.951	144.584	408.267	343.453	236.823	275.583	491.761	283.331	192.238	608.128	665.306	5195.63	1836.5	1358.46	3739.99	1110.74	2209.62	58.2926	116.593	111.738	81.3507	43.5812	114.377	159.457	417.686	28.9925	163.374	181.747	83.1047	32.4672	120.457	65.3171	219.65	144.54	636.966	517.1	924.991
201111_at	146.976	93.0765	57.2861	69.1356	99.1579	96.7884	143.183	143.117	99.632	25.1927	44.9236	84.0577	158.837	70.9119	98.6654	274.001	77.7483	335.779	192.463	117.218	145.213	213.13	63.0116	327.758	161.945	250.132	184.178	211.294	446.213	80.7077	30.927	104.037	33.1396	19.3476	94.7916	49.1572	38.5164	15.8906	32.4262	28.8076	27.8499	202.549	26.3581	20.416	29.2767	13.5032	66.8302	29.5735	463.04
201112_s_at	416.589	254.562	161.716	247.22	232.474	349.241	747.594	516.779	675.142	193.887	192.215	293.613	497.978	252.087	308.001	1031.13	395.444	942.739	826.223	313.155	359.705	634.378	132.226	1243.39	961.229	735.615	603.428	569.122	918.064	339.335	40.6414	565.519	45.7315	31.678	312.139	117.033	89.4999	30.892	72.9637	255.878	123.448	446.294	34.6226	37.5998	44.6453	15.3656	156.091	182.55	540.734
201113_at	75.7247	57.7374	45.0487	44.6102	42.2338	48.1013	100.519	137.434	71.7879	30.5729	25.4933	35.1329	47.3306	31.3318	40.2999	130.833	34.1872	84.908	31.9445	46.8342	140.939	156.762	75.0668	95.5342	87.7604	144.806	132.109	90.414	85.1684	31.8963	36.5304	46.4464	28.1416	34.2565	50.9742	36.5793	37.1041	28.592	32.7325	38.9601	18.9972	214.188	37.8041	28.0797	23.1044	30.4209	20.0067	29.6243	42.2044
201114_x_at	369.782	173.356	198.591	128.372	268.965	358.118	520.299	402.767	470.313	151.768	109.123	235.616	612.867	113.02	407.741	485.468	196.359	519.738	223.292	375.252	280.283	616.147	223.835	944.989	893.94	559.588	679.628	547.756	690.184	163.588	71.5281	393.625	102.67	181.583	406.594	171.246	117.013	88.298	150.083	191.246	147.06	384.41	823.743	145.208	232.13	55.4913	237.372	117.59	1017.75
201115_at	82.2483	101.697	72.4719	64.7557	70.2158	85.753	100.106	49.9012	104.497	63.0569	25.5412	37.7014	64.0883	23.3359	52.8917	126.101	34.6578	173.414	60.7418	86.4655	80.0572	112.413	29.3976	164.016	105.92	159.668	99.8385	126.986	146.435	19.7426	24.9337	56.4708	27.3074	36.6448	49.0676	26.2645	33.287	28.9231	19.2103	31.3537	16.1587	127.21	27.169	29.7205	14.3084	13.6326	21.9015	50.4876	145.056
201116_s_at	49.3295	46.1934	48.7303	55.9342	55.833	46.1575	80.143	54.4117	57.3385	56.3433	63.5076	51.9809	44.4425	48.4184	53.4244	47.5344	72.7163	60.8911	55.3691	52.2265	58.793	55.7041	57.4997	48.1979	56.8093	57.8434	60.1093	49.3556	51.8131	60.9569	56.2688	55.6639	59.3557	54.1231	67.288	56.9626	69.136	71.5086	60.49	61.1943	58.347	58.2764	61.026	59.17	50.5541	49.756	58.6397	68.4799	58.221
201117_s_at	31.859	31.0177	21.7859	50.5889	37.6572	30.9155	29.7844	24.3919	20.3855	26.7507	26.8281	32.2975	29.3899	37.7899	36.5184	145.089	22.2105	107.989	1127.42	32.315	36.155	46.0281	43.136	35.9834	29.1528	33.9353	38.1495	44.0448	42.4713	31.8418	36.7997	31.175	29.9236	48.6249	37.2015	40.03	38.7782	24.4125	30.7773	57.812	35.5715	38.4179	53.9636	32.0818	28.1177	46.4009	37.6143	37.1511	31.7212
201118_at	46.8325	35.5279	42.295	37.3594	62.9078	34.9798	112.45	88.7377	43.2629	12.0535	17.4357	71.7514	183.264	50.2741	164.991	138.004	35.2472	317.154	62.2195	202.496	143.056	163.43	107.941	820.587	147.47	497.692	338.073	694.177	278.835	22.9067	28.2658	38.0408	22.1742	18.5991	22.2054	29.2217	29.3809	24.1298	30.4612	88.7181	19.8135	58.7773	22.4905	32.2369	28.0963	11.4077	36.1255	25.1341	76.0614
201119_s_at	2140.97	1477.52	1160.21	975.561	1370.12	974.896	3139.68	2712.48	2779.73	1961.88	872.351	1238.79	1851.51	851.93	1711.46	2719.36	1695.23	1815.96	2271.65	2008.56	1531.56	1635.55	3866.31	3194.78	3154.77	2597.63	2073.42	2306.81	2156.28	938.178	377.087	1142.47	670.74	697.087	900.543	1140.25	631.3	949.055	653.722	2066.65	1088.85	1067.25	2127.23	785.202	693.809	3458.68	901.945	1145.41	3529.56
201120_s_at	34.7703	35.8925	43.2559	40.2678	42.3715	49.0142	53.8984	72.6022	72.9759	73.3768	49.1494	57.8777	58.432	54.8799	71.1971	78.3051	63.9231	68.5916	60.9738	57.4264	66.2062	79.2815	55.7381	79.2068	83.72	71.767	86.8017	73.4573	75.7543	62.9227	63.9747	47.158	53.3217	57.7387	57.4336	50.2172	52.4429	59.0091	47.032	59.6342	56.5044	69.6648	55.9046	59.7241	57.8386	58.7026	59.2251	57.6479	71.4645
201121_s_at	348.522	409.235	313.577	593.994	1030.05	518.735	1565.84	1665.31	1909.98	531.099	499.635	706.431	813.663	516.184	1186.8	4037.57	2968.47	3891.19	1618.24	2206.7	1882.24	2740.3	545.601	4254.32	3668.88	2122.63	3599.09	2610.36	3401.81	402.013	285.533	278.651	230.36	126.346	580.638	233.729	280.595	125.058	654.953	1013.35	268.691	424.347	907.619	249.306	1116.47	156.194	1456.14	300.438	589.055
201122_x_at	103.101	132.788	67.3008	100.088	128.531	118.616	96.7599	73.3439	40.7752	61.4941	34.9597	98.5459	160.681	96.4688	174.034	139.596	64.8531	153.466	167.074	98.1442	336.434	313.7	166.127	173.55	93.4548	109.16	241.125	429.416	522.397	505.608	276.045	369.805	119.767	200.541	208.569	436.174	430.281	92.6111	297.125	63.4126	79.1316	303.637	849.257	258.331	240.644	187.007	183.369	184.714	200.487
201123_s_at	31.3496	29.8033	27.5377	31.0037	27.8871	25.8502	22.3167	18.671	49.6486	17.0904	14.73	19.5428	27.1364	16.6381	21.9327	33.3687	18.5397	29.8885	23.0848	22.07	71.9409	85.4069	23.8725	81.516	27.5633	21.6892	37.9009	89.5953	48.4708	132.156	47.7376	145.456	30.0704	46.3187	68.6662	53.3394	79.5009	39.5734	54.9421	17.4874	24.8509	92.2779	45.2569	37.7797	43.2475	25.4765	33.0238	39.7787	29.976
201124_at	28.378	31.2531	33.0394	48.7551	42.8397	48.7586	49.9981	60.3627	25.1548	46.008	45.3953	48.6582	47.2617	50.0691	52.1838	46.4707	44.5364	49.2766	39.2886	37.6924	35.6103	60.7293	54.6359	56.4849	41.6006	59.8408	76.1721	54.5439	65.3709	41.5087	44.4789	37.023	47.9655	40.4689	36.8323	44.4725	46.6888	46.403	47.5224	36.1415	36.2721	51.1276	43.5695	42.458	49.6511	47.8836	41.0335	48.3986	48.3375
201125_s_at	21.5803	31.0627	93.1892	84.1942	100.652	77.2059	117.459	83.9401	45.7747	58.5015	68.4723	93.4038	116.616	78.7806	120.995	103.06	76.8204	128.242	95.147	73.2308	88.6317	143.64	99.0061	650.615	98.6385	371.42	633.038	176.763	186.119	104.08	91.6016	144.83	90.3373	98.2687	106.312	93.5564	87.0975	67.3286	93.4484	69.7791	80.1532	104.759	97.2042	93.6536	101.677	84.8634	108.609	85.6286	138.806
201126_s_at	185.92	176.02	94.4397	99.3447	164.69	173.736	94.8879	44.244	34.5291	25.4485	56.9856	167.037	340.754	115.342	347.583	71.7133	21.1993	154.893	103.53	130.312	105.444	73.4341	56.2619	300.163	127.159	348.008	198.169	248.401	140.299	90.6616	33.2529	95.2967	17.7478	56.5016	84.1542	43.4701	65.9085	28.1735	58.3443	45.9851	50.9181	91.0673	54.6414	43.7414	44.0359	15.9954	33.6125	93.3789	265.575
201127_s_at	631.008	637.343	1449.59	760.118	434.744	622.179	1280.52	2650.61	1513.99	2160.31	2909.57	864.469	867.059	722.827	306.257	1338.98	3023.65	388.222	610.246	2327.05	852.209	1599.29	1159.71	644.209	1900.72	961.464	586.566	543.136	289.649	175.261	550.851	355.933	884.53	147.464	215.176	295.14	183.874	1542.85	165.111	1527.66	979.728	570.202	163.71	919.05	177.764	990.7	152.058	180.467	547.265
201128_s_at	603.392	611.066	407.607	388.145	550.173	653.878	952.11	1375.97	1368.35	452.564	434.264	485.378	698.373	351.222	521.074	1285.25	1070.13	864.545	883.726	875.999	1110.8	1410.69	663.181	972.888	1411.38	865.203	1039.58	1220.08	1774.41	516.25	433.603	471.484	337.774	338.224	398.431	883.481	376.174	381.597	509.919	854.445	379.127	465.689	601.748	373.692	317.539	316.017	338.409	337.625	778.739
201129_at	250.284	190.031	51.5343	114.106	153.893	188.359	652.461	326.11	465.983	317.694	159.528	189.792	325.589	112.746	221.564	688.41	251.998	556.219	336.502	305.103	270.527	353.049	88.5921	480.842	387.742	493.456	242.888	243.041	280.864	44.9165	24.8279	36.6358	18.6625	14.9515	40.6569	32.741	24.3802	8.8165	27.5451	87.4575	17.9898	133.392	25.1203	17.2518	26.5244	8.34315	56.6016	53.0002	329.975
201130_s_at	39.7772	33.0208	36.1586	50.0014	43.9874	42.4935	56.1174	44.2152	54.8058	56.9068	41.0071	49.5121	54.7665	49.4465	54.117	48.2659	38.5018	62.3535	48.4769	45.7207	39.8306	79.9838	56.8074	49.5953	43.4288	62.29	56.6904	57.8704	68.2586	51.6398	62.8723	62.6303	59.5458	57.7544	74.5225	65.7729	63.8956	40.8073	55.5509	50.3158	37.6765	61.0279	66.124	45.4433	55.0233	46.3948	45.1136	54.2166	54.7381
201131_s_at	446.834	328.742	72.8147	101.626	184.756	154.759	110.953	108.84	70.5796	82.1981	106.627	256.784	277.409	698.52	210.43	70.5607	56.7546	95.3092	94.3092	72.091	132.522	503.878	574.538	785.992	284.112	139.034	1071.94	910.56	2196.33	1218.49	388.296	2142.91	825.019	611.76	1273.99	1037.33	1155.19	556.454	627.453	349.151	856.713	1098.3	3921	735.089	1135.09	548.087	622.434	881.593	1052.33
201132_at	637.737	536.988	341.468	436.684	603.745	514.151	724.84	830.725	970.289	488.587	545.689	541.579	652.236	377.599	640.126	693.81	428.014	994.868	428.243	506.586	400.246	403.138	124.244	1108.74	772.88	658.43	602.345	551.418	662.753	160.913	54.1181	728.255	39.0039	69.442	251.19	72.3786	75.7315	48.7967	72.0122	285.72	168.982	137.821	233.253	44.9075	361.459	129.459	180.642	128.316	964.122
201133_s_at	264.784	239.333	175.817	231.498	379.381	454.562	274.921	332.438	234.81	190.375	208.425	269.281	313.806	212.245	378.771	300.882	176.421	506.451	333.932	221.36	256.024	355.426	74.2928	687.479	363.903	347.819	710.625	649.54	522.573	459.158	129.17	379.184	142.759	191.615	238.331	305.56	252.36	130.599	372.915	226.542	107.111	208.431	227.661	241.912	358.241	167.54	335.101	200.088	341.184
201134_x_at	958.995	819.646	877.567	583.637	718.975	1091.32	1253.74	1629.1	1711.91	965.501	667.841	724.279	705.225	769.327	759.471	1677.35	1665.38	1127.28	950.99	1141.78	1712.32	1868.47	879.757	1103.78	2036.44	1368.96	1301.96	1617.39	2158.02	1052.63	778.299	807.004	930.833	1154.58	678.066	1644.67	648.947	849.498	937.796	1082.69	321.55	1028.02	1066.35	496.472	993.489	507.002	879.556	661.456	1191.97
201135_at	74.9955	77.2595	41.8055	60.2951	58.353	120.686	217.041	58.9532	51.7461	15.5317	19.8393	45.6272	129.538	26.9603	62.5527	128.367	28.7646	81.0359	47.3728	76.8003	127.922	123.374	38.8094	71.9707	82.4874	153.53	91.4625	125.321	80.3373	29.0686	25.9453	32.5613	13.2194	20.5803	26.1718	23.7031	23.3958	11.4821	20.5118	52.4444	7.06484	47.9183	20.3951	20.1022	22.1415	12.4871	17.6141	22.9582	31.9984
201136_at	639.106	620.959	342.03	437.473	587.655	395.733	587.257	376.846	470.09	162.945	555.062	629.618	813.249	459.481	757.663	292.285	108.803	159.303	265.454	331.434	339.816	304.826	1208.83	912.127	460.988	1153.34	459.737	356.942	431.872	49.4779	72.3219	58.106	35.727	27.6646	109.042	50.0306	49.6835	41.0859	36.1519	124.815	62.717	159.411	54.9316	56.1071	48.9725	35.8239	101.778	21.478	630.662
201137_s_at	1582.72	2530.09	1672.46	1880.7	1815.92	1323.47	831.87	551.977	958.326	462.402	1115.71	1710.13	2489.6	1380.15	2231.04	180.078	92.8694	640.771	277.819	480.444	124.018	79.1823	44.3036	384.944	512.687	1035.92	284.61	42.6997	128.417	29.7245	31.1305	43.5496	21.0077	36.5005	17.8748	31.0344	29.5474	27.1158	22.0177	126.435	34.0668	25.0111	56.9236	33.0364	44.9008	320.405	177.47	111.03	3976.15
201138_s_at	820.751	778.275	1005.21	539.395	492.741	758.577	1050.53	591.978	1371.52	1040.23	910.828	561.834	661.068	353.456	468.183	1706.83	1623.05	1307.93	764.683	1313.03	949.733	1209.39	1189.51	1083.51	1672.28	935.843	1289.68	1069.64	1076.33	465.887	134.136	469.262	251.007	254.91	354.032	141.74	158.215	330.449	244.397	629.47	270.65	451.72	127.542	361.759	431.731	124.895	399.039	257.729	743.084
201139_s_at	1815.26	1417.31	2860.04	1172.84	1164.54	1067.46	2966.91	2123.73	2403.24	2326.28	2441.2	1341.51	1495.38	890.453	996.351	4429.56	4470.69	1801.36	1695.75	2665.36	2022.88	2766.52	2377.01	2246.11	3906.27	2110.96	1926.46	2141.92	1856.37	939.721	804.485	979.352	789.658	457.844	720.092	468.931	300.733	1748.85	455.3	2614.58	1127.39	1032.77	354.223	625.227	755.266	1028.83	630.53	377.771	1155.37
201140_s_at	300.631	185.219	126.074	225.097	243.018	397.899	129.895	62.6082	76.2511	110.139	128.722	210.194	285.169	127.848	415.944	155.286	70.6017	207.84	144.402	198.1	185.73	175.881	483.219	468.316	200.57	317.219	387.618	385.556	467.227	510.232	301.33	488.115	331.918	967.996	280.627	361.299	806.488	277.561	627.663	360.068	164.243	198.009	119.6	747.279	746.937	555.261	185.322	153.146	456.889
201141_at	68.3766	50.2757	38.3003	60.4771	71.3983	42.8168	56.7871	54.5613	33.5099	32.9516	19.2039	55.7453	165.075	39.1939	77.7218	49.1133	50.6857	60.9432	62.7882	60.0573	51.3729	68.5029	58.2586	79.7792	51.4269	79.2862	51.9957	123.791	67.8651	58.24	54.1437	59.9358	64.5944	49.1599	63.7994	77.2441	87.3626	58.6361	76.015	40.5081	61.2562	60.6996	60.0658	59.161	50.947	68.1511	57.4947	63.1514	45.1718
201142_at	358.742	163.245	140.502	158.446	203.868	364.686	540.253	489.021	641.959	192.505	66.4434	182.889	549.755	96.7565	316.552	788.947	342.752	580.556	654.764	766.335	937.76	928.762	117.052	626.599	784.58	809.431	929.903	956.004	789.679	1276.1	517.777	837.103	421.856	413.846	616.473	610.047	755.194	505.711	799.959	602.261	364.174	498.757	600.667	631.189	876.496	465.926	464.03	308.936	386.77
201143_s_at	633.65	566.853	628.703	470.173	485.291	737.556	1035.34	754.139	1267.68	523.017	509.615	533.828	712.526	390.474	572.755	1469.64	836.46	724.652	1347.2	2110.46	911.322	1778.63	4498.28	948.66	1296.44	1411.96	2023.81	1431.28	2504.35	1697.3	557.06	974.271	878.708	872.22	900.196	1495.53	932.447	1586.92	1403.28	1502.64	870.686	727.636	2788.79	964.639	977.765	3453.85	435.722	1122.47	305.847
201144_s_at	680.908	610.821	365.374	385.927	550.611	490.894	860.916	802.584	1234.35	961.226	651.109	479.563	595.982	265.888	512.622	1499.27	963.155	824.649	596.975	1005.18	1097.35	1517.11	1539.91	1261.87	1916.55	1047.61	1603	1292.42	2255.08	997.084	213.88	921.619	579.927	577.356	555.494	702.804	349.306	927.403	856.684	1709.75	546.134	886.095	1258.08	943.392	742.928	489.5	337.539	420.633	793.607
201145_at	98.076	109.47	56.5559	99.4418	116.075	172.994	175.833	90.7794	53.6753	51.5167	59.1311	98.2786	198.143	80.1306	99.3674	197.11	58.8037	84.6641	43.7845	101.991	125.731	116.526	49.0519	153.439	201.358	269.569	96.2997	159.62	68.3407	48.6098	50.1846	72.3958	36.0776	19.4442	99.1746	37.1773	27.0462	51.7445	29.5961	80.8008	53.7005	124.102	32.3841	53.1123	29.8431	15.1801	71.179	117.574	38.8963
201146_at	181.575	223.857	73.6042	176.731	200.878	224.958	73.8483	114.847	65.0715	129.52	161.192	175.519	166.856	161.413	218.611	114.889	49.873	84.8037	91.2662	83.4998	132.057	86.9827	72.5195	167.413	119.396	152.443	145.472	106.292	132.248	60.2037	59.0594	105.144	47.5151	45.5692	78.3795	64.804	82.4837	33.4062	41.4446	21.4729	49.8878	122.58	83.5667	47.3142	65.5122	511.297	60.0962	45.6818	348.78
201147_s_at	62.3113	92.7178	153.293	122.027	110.037	105.264	171.37	99.5473	90.0521	121.243	132.106	106.933	83.1001	99.6941	119.469	302.652	122.353	305.554	169.115	292.412	133.467	191.018	382.296	983.329	194.103	358.858	1588.5	461.59	303.274	104.401	100.781	83.2024	128.104	87.2922	83.4065	147.501	104.446	230.563	83.616	224.854	128.732	86.9614	91.7424	136.454	117.453	89.5571	70.8898	105.099	147.992
201148_s_at	69.1243	48.4982	116.983	112.281	95.297	62.9239	184.063	77.3393	72.0799	36.8944	38.9143	72.0312	87.161	68.7714	115.41	563.673	203.625	373.622	200.612	277.635	373.647	241.368	171.748	1406.18	513.126	852.243	1947.7	678.8	764.541	70.8037	52.04	179.398	65.7813	70.2194	71.6632	62.418	51.1246	57.1127	68.8695	125.155	104.728	82.0234	37.9055	64.9738	58.6105	34.9883	56.9224	39.6727	561.054
201149_s_at	22.9931	23.7812	32.1944	28.1985	26.8889	26.5614	27.0351	30.3011	41.8983	28.112	30.1861	28.2546	28.0761	27.8219	27.0286	35.6096	27.2049	31.2655	28.937	28.0082	29.3273	27.4699	30.6336	40.514	34.6598	31.7517	80.7729	38.1893	39.1178	33.5838	30.8114	32.1918	33.8912	32.441	30.9395	28.3768	32.4046	30.7048	27.1382	27.7673	24.3391	30.6871	32.9076	27.7825	40.4619	28.9882	28.5911	28.2484	41.1322
201150_s_at	92.2868	116.328	151.427	176.6	187.827	164.149	185.346	173.017	161.735	76.9448	68.6417	113.208	109.593	147.976	147.555	513.232	286.301	373.941	444.922	305.595	372.636	219.602	337.447	1048.46	323.011	641.91	1683.31	333.353	571.921	88.934	107.019	132.011	117.438	101.778	83.0913	139.747	101.042	63.9959	108.48	229.716	92.5209	96.1172	130.453	106.331	84.8959	124.137	88.0521	63.256	282.905
201151_s_at	256.139	246.734	220.365	424.479	399.375	570.242	267.809	305.8	307.95	346.519	193.153	275.896	384.287	184.025	424.18	218.93	222.251	471.277	461.601	161.048	308.795	415.849	75.4161	1009.64	406.41	281.275	1129.53	764.136	1303.13	805.416	529.167	388.942	512.213	1205.78	556.133	1237.57	1053.83	699.401	1258.3	765.549	193.04	181.426	1008.85	695.096	1360.6	928.074	686.129	550.082	452.046
201152_s_at	911.548	579.444	1162.43	1227.3	1128.15	1568.4	916.047	769.344	1251.66	1422.43	1083.54	962.81	1012.49	698.377	1121.6	1139.63	747.483	1747.71	1002.8	1057.26	1100.22	1571.61	321.162	1982.93	2108.58	1127.92	2717.27	2047.78	3256.66	2115.52	1557.36	1019.92	1432.81	2900.88	1109.43	3141.72	2109.82	2725.58	2826.2	2212.19	904.645	648.176	1654.03	2097.44	2621.48	1937.43	1276.18	833.546	1029.42
201153_s_at	857.422	1027.8	939.354	1388.04	1232.15	1510.11	1380.69	1164.01	1633.98	2177.78	1428.46	1262.41	1263.84	887.689	1584.8	1357.57	1026.03	1346.2	1174.94	1372.54	1196.05	1679.86	540.718	1650.38	2122.25	1321.67	1985.19	1951.77	2806.94	1832.38	1656.63	1365.81	1788.16	2522.18	1002.35	3077.18	1949.32	2852.65	2151.08	2938.19	1173.94	825.366	1707.24	2169.2	2075.54	2416	1107.02	889.608	1483.46
201154_x_at	3220.52	3523.07	4470.31	2869.31	2304.45	3342.86	6904.52	5312.91	4801.1	4871.85	2933.49	2839.26	3685.14	2199.33	2733.33	7996.91	7244.73	5609.72	3717.74	4117.68	5472.06	6021.4	4010.86	5424.76	9246.48	6059.45	4223.56	4505.9	3243.28	875.326	699.61	1227.56	777.789	388.001	973.377	711.514	312.789	1217.92	692.091	3441.8	993.761	2129.37	983.904	601.336	691.456	1607.84	1128.22	1222.56	3123.49
201155_s_at	73.0126	56.4337	56.0187	63.1353	104.811	129.911	35.9134	33.2802	38.5446	31.361	30.0989	64.5196	116.113	33.2416	149.161	97.1532	23.3892	163.265	59.3743	95.4146	121.769	189.124	55.4687	415.993	195.383	182.675	287.853	266.326	218.783	1043.47	990.229	695.656	909.662	1823.4	654.531	563.371	1413.05	845.61	1205.35	765.179	342.459	322.822	218.656	806.812	1181	354.245	344.878	287.888	207.584
201156_s_at	171.701	195.342	222.463	174.646	197.387	166.306	129.496	90.4679	71.8825	200.613	264.212	141.061	120.243	134.786	92.4625	123.834	251.486	78.9465	85.3601	132.956	118.053	199.879	88.2794	105.273	335.493	145.328	111.61	46.3379	77.6753	71.6473	86.0503	67.3342	112.797	60.1427	68.353	86.1407	116.937	331.71	81.2249	231.495	149.08	124.125	57.7204	161.949	85.6829	135.443	83.9061	89.7624	85.1314
201157_s_at	53.9155	81.0085	74.75	101.939	63.4151	89.4711	53.8861	74.9166	56.0681	60.1637	42.1535	74.4843	127.297	52.4861	109.286	101.024	48.4385	69.6034	63.0997	50.163	106.091	95.676	61.2245	133.284	148.077	210.914	175.782	158.878	113.889	112.22	87.6095	243.143	62.1313	64.7794	110.388	77.7915	165.382	51.2619	63.1708	57.7285	100.988	447.448	66.4204	56.3359	46.6302	39.3819	41.1148	119.758	71.5154
201158_at	69.0022	58.3871	45.2266	64.0776	54.7098	55.0743	40.9617	26.1037	60.4075	25.3857	25.9388	39.6713	63.1665	32.5082	46.5023	52.6359	23.5739	48.5057	28.789	38.2427	50.3303	51.0117	46.0403	70.6235	67.7585	68.6858	59.2347	55.178	52.4155	58.3878	38.911	47.7232	37.5878	35.1818	42.2884	30.0728	27.0322	28.0105	21.0467	50.0579	23.9909	67.5848	20.0922	32.7654	25.7782	20.4184	32.1456	22.4338	58.7537
201159_s_at	42.6457	37.2003	39.8964	44.1851	41.1198	37.4868	35.9362	30.3417	23.0875	34.0407	45.4635	45.0374	46.3712	43.0822	45.2984	32.1946	33.9783	40.5411	34.885	38.7543	40.3	46.0168	35.5483	39.432	33.1361	43.5529	42.0829	37.9895	32.3076	43.6825	35.1505	55.1242	31.9687	43.4225	35.7735	33.6822	39.9522	34.68	32.7889	38.003	33.2474	56.3266	45.7215	36.1319	36.255	35.0413	37.3086	29.816	40.188
201160_s_at	1283.06	1226.71	1519.6	1361.65	1666.25	1453.49	1112.24	1912.21	1853.64	207.692	973.902	1069.57	1328.45	815.306	1240.69	1426.8	1739.18	1194.05	1681.28	1563.38	1555.89	1864.56	1531.25	1475.86	1710.42	1214.56	1448.89	1283.61	2448.92	2651.33	3350.04	2088.55	3278.73	3215.68	1607.99	3495.73	2172.27	3264.5	2613	4126.96	1654.03	1308.65	5649.73	2567.93	3409.67	5880.03	2358.03	1813.02	1717.36
201161_s_at	278.01	456.136	482.914	372.976	365.646	629.566	329.514	351.633	255.57	320.743	357.45	338	258.355	309.972	455.947	212.106	273.001	339.492	338.723	365.757	661.534	828.724	253.903	252.479	244.088	334.597	487.125	573.153	254.508	2365.24	1855.43	1966.86	2930.03	3041.01	828.4	5455.35	1797.7	3701.55	3709.96	3910.17	921.696	956.025	7667.89	2449.31	3233.02	4636.17	1002.75	531.35	459.619
201162_at	57.7234	44.6516	41.866	43.3947	35.371	44.9466	62.5328	60.5985	37.2611	16.8736	23.089	34.9688	38.8793	29.6151	56.2451	52.8477	23.9292	60.4171	45.4338	40.1807	106.309	63.4377	31.7646	48.2565	39.8142	71.5882	41.9606	108.92	33.464	31.9531	28.6701	36.1371	22.8684	25.5808	24.4006	28.6302	32.732	29.065	27.0307	25.5799	25.7476	22.2335	25.3431	23.9527	28.5986	26.6698	26.9969	24.4879	47.6878
201163_s_at	180.252	200.08	152.197	114.686	146.609	165.965	574.079	617.18	541.175	172.097	105.41	163.273	183.686	176.121	208.392	276.684	207.644	393.418	439.343	285.136	420.376	226.157	53.8522	116.736	177.181	274.909	137.002	492.159	99.3846	15.3272	28.2395	12.5064	23.1912	12.4293	11.5906	30.4701	25.2985	105.504	24.1619	92.3646	30.9193	24.955	21.0871	41.6239	12.4814	33.191	82.3857	19.7948	178.854
201164_s_at	81.5396	57.3971	40.4593	65.9276	54.7381	83.7258	41.8689	49.1846	41.9789	28.8653	27.714	44.112	70.8915	30.1827	63.8523	66.5562	24.9867	68.8669	68.2227	72.8891	48.4702	58.2636	35.2028	86.2065	54.6612	75.9627	89.743	67.04	63.8623	38.7233	43.7352	85.2952	32.4715	34.6632	48.0895	27.1803	33.9629	21.7867	33.9288	26.0115	32.3978	57.6781	35.5752	35.7326	24.0433	30.3026	37.1422	44.5793	50.455
201165_s_at	388.744	505.181	308.371	537.351	473.529	737.753	758.154	855.171	1091.51	500.31	597.915	624.435	879.817	377.809	764.973	789.358	583.452	1155.4	666.451	621.651	409.008	570.91	90.6875	923.697	696.429	744.687	756.048	618.794	861.527	239.772	93.3603	572.385	128.242	148.577	362.832	214.499	158.13	61.7078	248.285	288.936	219.555	244.524	1375.65	61.4303	218.222	64.708	403.019	334.937	1151.88
201166_s_at	839.264	659.739	683.853	640.496	827.525	798.198	1586.94	1737.81	1892.84	1236.76	744.785	797.587	1196.77	506.851	895.757	1417.06	1335.01	1572.62	1220.2	884.91	793.551	847.153	74.2326	1282.57	1316.88	1143.43	805.947	878.414	1162.33	358.072	159.848	696.627	121.816	161.875	430.109	112.932	204.16	163.452	284.699	588.321	387.473	351.267	2915.88	78.1423	248.286	157.387	539.701	347.616	1283.14
201167_x_at	37.4093	40.6119	34.9098	42.8238	28.5995	35.4671	34.0902	26.991	42.8178	29.0264	42.2567	29.2174	29.0516	23.8516	24.8877	40.7882	40.8757	29.2387	27.1712	42.3903	54.6922	40.045	30.8167	41.7477	71.228	47.0339	35.9552	42.1402	41.191	24.7805	28.6094	25.4332	34.5781	26.8397	25.3903	32.5612	30.919	76.8201	33.8638	75.4929	34.2602	28.9006	24.0499	43.9509	23.1479	30.3068	21.1717	23.3857	22.2764
201168_x_at	38.4138	37.078	24.8708	34.94	31.9062	40.1329	28.6162	28.1835	18.1707	25.6532	36.5425	37.4159	41.3535	32.782	39.5621	43.2875	34.1566	34.7762	45.8888	35.3743	37.6336	41.865	30.8333	44.2584	31.614	47.2429	39.6897	45.7727	33.4645	34.1502	21.7695	26.6532	21.5766	30.6874	28.8924	29.4494	35.5437	32.6313	29.8425	39.4026	34.5977	27.2225	32.7628	32.5522	30.1162	26.831	33.1462	35.6073	29.1811
201169_s_at	39.0545	25.1606	35.0796	28.2731	27.3889	23.9476	37.4947	32.0687	68.4011	28.7746	35.0416	30.0082	31.916	25.4223	28.52	33.4057	32.2312	29.3124	27.4554	41.2703	32.3539	30.2718	28.8565	32.9568	33.1316	36.2162	27.9822	32.7493	28.8814	28.1914	32.3177	30.6277	32.5601	34.9637	29.4193	33.7886	33.2323	48.2555	27.268	45.8411	32.0265	29.2699	32.3886	30.3045	31.9908	37.0544	29.3196	33.127	32.2392
201170_s_at	57.3024	63.4929	32.7409	42.68	66.2595	49.7541	43.8732	45.6851	11.8592	25.0621	27.0001	68.3604	145.924	58.2621	95.135	18.8387	13.7311	30.2303	16.7187	21.1756	51.5789	19.1822	23.2392	24.9865	30.482	50.7413	22.4969	52.9863	31.5396	17.4833	15.663	14.75	11.2262	18.9058	12.9444	16.9713	15.0532	9.79583	15.4317	18.6112	9.09012	16.9033	17.5767	15.3205	13.7625	13.1218	21.6573	12.0601	35.5201
201171_at	663.028	410.994	544.17	659.619	615.794	648.658	579.037	400.925	466.846	237.5	551.588	638.619	733.943	475.186	864.624	574.577	191.985	396.469	448.274	854.982	640.467	951.108	213.476	1165.41	857.4	982.729	1352.68	1246.56	735.415	1327.06	575.726	844.703	545.605	1322.67	192.781	1050.67	1040.47	1165.05	883.182	1176.77	293.544	359.23	186.773	1200.86	996.901	284.399	283.2	304.323	655.27
201172_x_at	1197.78	932.448	1037.55	1182.36	1208.24	1027.77	1276.85	1515.4	1369.29	747.364	937.345	1118.24	1224.05	920.857	1479.98	1097.21	776.248	732.591	1187.33	1429.06	1030.38	1405.1	2068.76	1382.49	1700.36	1434.52	1695.76	1591.51	2042.77	1187.41	818.837	826.724	1088.62	1361.74	377.854	2096.3	804.182	1720.26	1408.87	1921.26	666.44	566.944	1843.79	1454.18	1111.75	1842.66	896.628	559.375	1470.38
201173_x_at	78.1506	101.601	38.5943	52.2348	66.6236	95.665	96.265	34.4438	49.8633	38.6102	15.3157	34.8531	105.017	15.1942	60.38	143.326	45.4232	161.617	82.0201	135.147	102.035	113.095	53.6052	169.486	149.046	199.082	138.827	117.364	200.051	82.3635	16.8471	73.9935	15.5473	14.4214	31.7282	35.701	39.9824	7.06776	31.0841	40.7015	13.3453	123.281	51.0619	14.1254	19.0231	45.7956	14.8689	37.1029	47.0361
201174_s_at	284.03	327.544	197.579	384.473	297.418	553.844	183.548	331.61	436.254	424.682	282.91	378.397	418.871	249.496	693.421	285.793	110.157	443.849	276.822	444.941	360.344	561.849	171.129	1401.36	597.566	401.914	897.492	685.103	1062.76	4956.98	3353.27	4415.43	4378.13	6322.79	1979.92	7219.94	4078.32	6206.53	5398.01	6338.04	1935.19	1466.84	3531.99	4891.66	4857.13	6269.84	2268.64	1317.79	543.633
201175_at	336.607	262.377	117.742	212.083	294.308	360.693	337.24	344.977	524.206	140.228	168.998	249.138	377.755	184.213	327.606	713.903	236.558	387.299	410.117	415.568	308.398	334.624	212.797	402.544	455.426	678.814	325.543	373.1	532.473	119.15	64.7418	210.308	67.2718	56.698	127.86	74.5617	37.5326	26.4603	88.151	256.838	95.9636	261.775	2144.74	56.8348	65.8408	534.204	49.1573	92.2338	411.81
201176_s_at	318.302	395.243	184.3	353.136	425.912	455.917	343.611	338.46	490.156	215.498	231.392	342.983	512.058	253.446	460.824	470.088	259.306	469.488	360.292	565.022	350.874	534.07	600.986	718.456	720.231	533.465	843.58	815.12	726.354	430.513	279.756	330.061	272.441	516.656	216.189	273.686	559.182	321.769	558.843	507.158	147.858	221.429	289.26	339.393	477.95	296.456	242.015	212.694	470.56
201177_s_at	235.286	225.894	132.904	184.756	213.158	316.704	380.346	344.273	453.792	205.491	139.216	220.813	374.304	137.105	332.761	643.394	484.006	486.355	451.347	319.812	304.978	380.894	298.447	529.55	494.025	366.619	378.077	367.58	522.744	104.61	32.9371	287.095	37.5876	36.163	187.205	131.286	78.42	22.068	62.8386	179.635	82.2326	263.611	75.5303	23.3814	110.317	25.0635	48.8604	128.804	446.464
201178_at	476.33	543.308	495.634	574.024	640.894	684.387	1933.47	1472.19	1955.49	789.452	480.689	492.651	555.075	319.944	690.027	1776.84	1556.67	719.373	1055.95	1509.6	1835.45	1884.68	331.557	1916.85	1853.94	1101.39	1767.74	1490.27	2663.57	5654.86	4169.48	5505.5	4676.57	5498.97	2622.88	7185.84	4682.04	8351.76	5119.85	6699.85	3359.39	3520.47	7284.65	5263.99	4779.28	6893.96	1973.29	2361.91	365.543
201179_s_at	118.796	110.577	80.6981	96.7243	98.5142	118.904	107.42	57.8258	71.1546	47.9567	39.4885	82.3724	135.546	69.4271	123.891	106.54	43.5442	141.388	88.8099	49.7453	87.7277	162.924	64.8427	314.854	96.3741	228.142	344.557	253.673	118.062	181	132.347	534.565	98.2901	408.417	159.314	74.05	402.224	89.7791	170.584	59.2302	131.676	158.229	165.983	194.504	160.789	128.802	143.875	134.148	609.424
201180_s_at	630.356	360.625	207.411	259.274	387.339	554.542	333.379	286.877	448.389	175.728	270.059	329.454	418.13	219.247	475.854	489.705	268.395	559.341	469.155	461.855	293.002	475.432	91.4004	672.279	442.914	460.49	661.753	634.201	975.732	336.644	102.046	400.929	85.3573	314.304	204.102	114.458	330.404	168.41	216.055	281.906	188.362	140.807	568.061	210.54	311.097	45.0697	300.433	125.153	626.486
201181_at	61.2321	84.982	43.1251	77.1709	63.9602	147.136	51.5398	66.8465	28.5953	23.5813	20.7673	72.4547	140.592	60.469	156.097	38.3139	21.2949	77.2121	43.7127	56.3231	78.7065	84.7258	49.1129	168.213	65.8352	109.622	153.634	228.987	81.1989	36.1591	85.2631	264.452	46.6954	250.507	79.6133	52.9677	121.165	69.4508	151.808	47.606	64.8289	51.1693	76.5359	151.053	194.574	73.4222	63.9301	99.1841	72.9633
201182_s_at	82.9419	108.336	107.761	71.7532	67.8637	96.0566	80.6076	51.7858	59.4787	48.7714	36.6764	49.2614	92.2702	30.4449	57.1563	80.3002	54.8124	106.675	57.0439	152.391	73.0071	70.5447	99.9309	161.599	81.4298	89.0367	158.628	147.464	102.355	31.9624	67.0012	28.7628	44.1291	26.3047	28.5778	35.9394	33.6758	43.615	30.3747	70.7093	80.9875	33.4433	43.9565	53.9234	41.4051	34.7781	63.0054	21.3539	100.708
201183_s_at	53.9702	65.5772	43.3049	46.0487	39.8747	74.8469	26.221	32.5433	49.3336	24.9652	29.2199	45.4767	75.6245	31.4233	61.5974	86.3833	24.2372	97.1886	31.7624	33.5914	43.5028	43.4212	32.4808	52.277	49.3431	98.4363	114.879	74.1369	78.5348	28.1935	26.579	50.2704	20.6428	30.9544	30.02	32.1553	27.6742	21.2626	26.733	80.1248	17.5475	41.1565	49.9072	19.2656	28.9846	57.0953	27.3073	28.1266	339.031
201184_s_at	40.6462	45.876	27.5827	35.5438	42.0383	48.7071	38.8223	44.0341	16.0515	20.8501	17.9219	34.4685	56.0399	30.1927	46.5488	45.2355	22.0571	36.666	35.3264	44.0506	49.3614	44.8234	51.8829	54.7933	39.592	66.7709	53.9148	59.967	55.2918	18.1743	24.4773	31.8836	21.1743	20.0942	22.7876	25.1944	22.7979	16.2575	21.1616	32.977	17.1508	29.4591	20.5377	25.3424	22.0969	15.4711	18.2302	22.793	45.3314
201185_at	30.5721	29.1461	25.1055	32.3771	31.389	31.128	30.2708	29.357	18.6334	21.4494	29.6684	30.2564	28.7178	30.4117	32.3433	27.1654	27.7028	30.2001	33.5432	27.5186	30.3442	22.6273	27.5539	30.0725	22.3956	26.3299	35.7726	32.656	27.0429	25.2549	27.6453	27.3159	26.1358	29.2041	26.974	22.5278	27.8396	27.4493	28.1888	32.9678	22.59	25.5304	30.0686	30.6145	30.4817	24.4796	29.2933	29.2577	36.0946
201186_at	39.9032	26.4927	29.4992	46.8501	24.727	59.8376	45.2948	28.1208	14.1876	10.9786	9.64923	24.3104	49.3451	21.3866	34.2995	43.0695	11.7875	39.3127	36.8376	21.4178	34.6091	31.0095	36.5465	73.1494	40.6649	55.8294	51.8378	58.4165	35.2705	18.5796	15.8115	24.1338	12.3088	17.0552	19.6373	17.9091	17.988	13.142	17.0528	17.0076	13.9161	31.3455	15.1031	16.6271	15.0958	12.2017	13.3749	42.144	21.0312
201187_s_at	25.8484	25.0681	25.3002	27.9747	32.0784	30.1818	26.9478	21.396	19.7843	27.0259	23.6629	25.8087	27.6189	25.3726	26.7561	25.2484	25.5122	34.7118	33.6089	26.8978	30.3988	25.1342	30.2634	30.6658	21.0858	25.9765	31.054	30.4243	36.1088	32.6713	23.589	26.783	29.2474	34.086	34.7472	27.9139	34.3879	27.3868	27.9835	25.9692	27.9991	27.5822	40.439	33.5593	34.6453	27.8069	35.1154	35.3082	29.289
201188_s_at	37.5255	32.9543	66.5719	49.767	28.3646	28.3797	44.12	52.5424	103.119	62.837	63.4078	40.4909	37.9662	37.9549	29.4186	42.7083	55.2005	37.3479	37.669	60.203	57.8933	47.4997	38.3852	39.0838	50.5842	50.7147	49.5359	44.0741	40.8194	50.4614	49.4327	49.9235	48.4558	47.235	47.1453	42.8671	48.7533	64.8439	39.9555	72.9766	41.8961	40.8273	42.9327	58.4144	42.3646	45.1759	44.6977	43.6635	43.3955
201189_s_at	26.2718	25.4092	24.4436	25.5126	26.6796	33.9499	28.8515	20.1108	17.6808	40.1414	30.3416	27.9282	29.3323	24.4716	27.9333	26.8395	25.6581	27.0111	24.6022	26.0803	30.2202	23.124	27.6252	25.2043	30.4417	26.1024	24.8363	28.9636	28.5708	25.2927	26.5879	28.1135	22.8986	26.6515	27.7702	25.9065	26.4554	25.1312	29.7905	25.5336	24.5113	26.9277	37.0577	26.9541	26.7914	24.7397	35.5153	28.7105	24.8743
201190_s_at	80.9863	62.0505	28.0181	46.6371	53.0717	63.4091	40.2292	10.2141	16.2927	11.0671	14.7151	35.8804	67.0969	28.7498	58.3884	34.1514	14.4742	26.3113	13.6715	14.5271	35.852	31.3124	15.5225	44.8461	26.3553	36.6746	55.6742	57.2488	32.8378	96.4402	27.8302	107.411	34.4324	73.304	54.2117	25.3221	38.0654	35.5435	65.2962	23.8508	18.3603	105.628	22.4622	55.0321	57.5499	14.2591	25.4157	41.7763	69.0417
201191_at	75.8033	65.5093	41.0676	50.1056	55.2545	73.2576	40.3487	31.2749	24.5176	16.9363	27.4592	42.1356	69.9019	32.0537	51.2322	41.1879	21.5821	35.3147	19.8014	27.1021	42.0391	56.9371	28.081	47.1624	40.6876	33.9518	65.2257	55.5407	44.4634	54.0829	63.5809	135.604	45.0376	78.4625	62.8261	41.3274	46.6115	37.7078	60.6123	24.5954	28.9072	84.5972	31.5698	68.4701	70.5047	25.1299	38.4045	39.7253	80.4695
201192_s_at	62.5687	45.3538	36.6347	41.0902	49.7603	44.2371	27.1866	41.4466	16.0302	22.4456	29.2297	39.2924	49.8697	27.465	59.5376	34.8052	21.8453	23.359	26.6438	33.98	51.354	42.0819	36.6344	31.0607	70.9384	56.1782	44.3958	35.1994	40.4668	77.5241	46.4321	188.534	43.4084	62.5951	52.0715	55.2486	83.6112	43.5255	91.9069	37.4579	40.9254	277.046	30.7184	87.3214	46.9949	71.1687	31.6294	28.6778	56.6841
201193_at	916.573	805.949	401.869	587.437	639.279	365.821	875.791	1049.92	1256.4	34.8689	462.949	679.558	868.38	702.958	754.628	1360.72	1477.42	1810.42	1266.54	588.694	628.042	832.34	208.87	1845.97	1046.77	823.421	907.368	1079.67	1246.09	97.4044	22.8973	59.9182	15.4702	19.154	93.2373	62.1697	40.2316	8.76621	134.255	206.808	61.8343	62.5672	48.8356	53.2593	157.917	19.6363	283.5	81.4419	1216.24
201194_at	45.0049	28.8363	27.8296	29.0589	30.9156	34.8434	54.3955	23.9173	16.8574	79.889	26.1638	33.3633	40.1609	31.0083	38.0272	70.8475	34.5763	66.5437	45.7158	51.8142	80.609	90.2601	37.0356	69.9376	86.6226	109.494	70.355	63.2982	53.8368	30.1111	28.8792	37.7028	25.5264	43.4363	31.3361	31.4735	37.7321	29.744	36.879	32.2276	20.3656	50.5025	36.5888	32.3651	37.6007	23.3107	40.5725	36.7616	27.4871
201195_s_at	233.054	262.258	60.6169	131.643	169.437	161.091	486.957	666.044	573.998	159.759	230.332	551.424	824.305	941.849	517.032	482.245	223.837	421.945	350.911	472.377	568.338	910.894	1055.1	1380.12	810.915	422.908	1309.53	1040.26	2550.66	7038.44	4033.98	6288.63	4789.31	8980.61	3202.58	6447.71	3169.44	11760.2	7340.97	5158.54	3821.38	2337.72	6428.54	5469.85	5141.19	8380.93	3557.4	2547.62	2068.06
201196_s_at	99.983	53.1712	40.3572	49.4785	121.075	81.4054	78.9414	99.2621	80.6195	16.6702	23.2191	46.9327	131.796	25.5718	62.0001	272.417	69.4947	277.225	90.1088	217.788	325.964	299.385	38.8663	299.873	173.835	209.089	559.26	480.051	445.783	471.412	79.8825	446.677	170.044	362.024	194.472	129.215	292.19	171.017	283.241	116.797	60.604	212.785	290.004	227.661	467.679	42.4169	86.1022	140.514	49.1401
201197_at	879.465	771.809	537.728	791.008	857.054	851.233	1913.15	2200.33	2257.65	1188.36	688.011	865.665	961.662	708.921	1197.25	2519.74	3149.05	1740.2	2172.28	2368.46	2201.72	2220.3	2977.57	1906.17	2280.74	1486.76	2433.1	2307.34	3845.27	1657.36	805.177	1307.51	1870.42	1827.87	920.919	3172.72	802.259	2230.48	2179.78	2880.61	840.993	994.612	1735.95	1795.49	1917.22	2256.2	1218.71	752.021	1650.82
201198_s_at	110.508	64.5403	38.2529	70.0895	85.7235	96.0865	60.8854	95.2104	38.6183	25.1069	25.723	53.9013	94.1353	47.0168	74.1429	126.955	34.0247	115.287	33.9805	52.0917	85.2504	102.004	64.2418	119.398	132.025	142.852	120.948	149.677	116.005	128.02	76.968	269.357	67.9802	117.734	148.834	72.3039	49.2793	50.6759	87.1632	36.3214	81.6927	485.228	42.3625	116.442	75.0006	27.1434	67.7948	62.4328	126.828
201199_s_at	245.156	145.203	70.9015	132.107	151.856	247.842	159.772	187.571	104.222	49.7561	37.3195	111.171	302.174	96.3837	140.532	360.646	129.858	327.295	80.7854	111.273	312.669	277.763	86.2994	476.206	429.039	423.102	332.12	331.135	346.279	312.986	97.1485	658.938	154.428	238.06	317.937	126.243	110.319	113.317	160.526	145.041	124.996	723.933	97.6075	180.44	129.695	198.406	98.012	161.135	876.175
201200_at	574.721	268.687	208.37	217.997	449.529	241.815	2004.9	1188.07	1798.95	230.365	149.898	325.494	352.688	283.105	749.963	1438.23	1031.47	774.886	880.217	1401.08	1574.2	2138.85	1917.44	1371.13	1725.12	1300.89	1585.08	2064.68	2022.08	3622.39	2569.2	3031.83	3645.9	4319.85	1409.15	5236.59	3166.36	5539.31	3646.14	6245.02	2388.1	1573.13	4832.79	4099.59	3657.72	6765.12	1479.2	1205.64	1249.34
201201_at	95.6989	82.9986	35.6285	92.1112	76.0408	101.355	123.483	143.053	66.0246	43.378	49.0441	110.533	180.88	76.3591	220.356	142.349	33.6703	87.385	74.8483	79.6931	200.418	282.941	64.038	108.863	146.421	362.69	118.159	172.761	114.163	177.236	75.4454	110.851	52.222	34.6095	55.9384	71.9959	64.1305	49.4045	62.0322	40.8026	51.1406	350.629	137.326	124.212	72.3551	48.386	45.3483	162.539	176.662
201202_at	208.69	81.9954	54.5538	57.8623	70.9293	116.025	219.234	257.782	234.752	130.481	36.299	83.8335	182.489	64.9612	114.785	762.574	295.051	671.847	435.734	207.214	330.954	475.042	738.663	796.411	455.169	519.556	389.858	470.193	492.255	339.43	45.9189	810.149	51.1989	35.9323	394.006	92.5504	41.5432	22.6478	49.5951	119.013	238.738	999.464	238.478	26.0624	68.7957	30.062	171.598	144.443	296.166
201203_s_at	42.3644	47.0181	79.8388	38.7823	39.3284	40.2668	47.3264	45.0182	116.622	59.9245	66.2003	42.1204	35.4806	39.5649	33.8694	49.1456	66.0176	43.8194	50.231	49.66	52.0181	65.6105	40.705	41.6538	66.5546	44.7108	46.8611	44.7853	45.6268	43.3967	63.2819	52.7356	51.2742	53.1815	53.1984	49.3704	52.2115	131.617	52.1436	93.2838	62.0238	40.043	47.528	48.5868	43.5043	60.0962	46.2804	44.0231	41.923
201204_s_at	72.6693	77.0239	71.5639	72.445	77.545	80.3342	107.657	117.847	76.6848	69.9146	47.1811	69.6659	90.8014	62.6911	87.7031	86.8571	54.6903	73.3472	92.0053	129.932	137.045	101.545	167.184	76.0528	78.8129	164.397	87.4596	93.7743	62.4063	63.2887	67.4594	47.227	72.2619	41.5133	26.1149	45.257	38.6321	57.447	40.055	86.7746	48.606	56.927	109.569	58.9707	41.903	83.0752	26.742	57.5303	90.9944
201205_at	44.7725	55.257	38.6942	52.8083	63.7465	54.4491	43.0055	34.8339	11.9871	26.82	36.1538	53.0692	72.5312	48.3538	62.555	50.8898	24.9948	51.4172	41.905	49.6274	48.6924	33.3996	34.6226	42.7438	35.1357	40.301	50.2017	43.6524	41.9952	37.3109	33.036	35.8667	30.2227	42.816	30.3382	33.3615	36.546	23.6149	33.1572	33.6317	33.6709	28.4693	35.7497	34.7662	37.4737	31.3418	35.3157	27.6099	44.5368
201206_s_at	46.6498	34.6768	99.8581	31.6265	29.7012	31.6405	41.8145	48.7668	64.5455	116.366	99.6176	42.0394	35.5669	27.2412	32.3608	39.1805	43.92	39.2111	38.9769	40.321	35.8927	50.9837	36.2222	33.4318	65.7634	50.9957	39.2145	39.8104	54.621	38.0094	34.3931	32.9035	39.3918	38.6833	35.3198	38.828	34.4832	73.8169	29.9764	102.861	40.3545	30.8048	38.3657	43.9618	33.08	38.5577	31.1791	35.6926	39.3846
201207_at	52.8672	65.0271	47.4339	64.9795	82.3934	78.8911	30.5518	47.1519	46.2916	18.4303	24.8241	45.8704	76.0335	36.4258	64.3934	49.6035	22.2633	72.214	51.19	43.2018	67.4729	53.857	39.133	65.539	43.7063	64.3386	99.347	70.6079	70.906	52.0925	34.1114	86.9675	28.5236	32.9648	47.403	31.5938	30.5173	23.8912	28.7585	17.6694	25.7454	72.0518	32.4443	28.3243	45.5584	16.7859	45.029	74.9946	48.5648
201208_s_at	33.7459	28.3422	28.7046	33.2424	33.8747	30.9788	30.8499	23.5487	21.5399	23.2502	21.9152	26.3718	30.644	25.5001	28.2441	26.3417	21.5413	30.8867	24.3188	31.5789	29.3788	27.8232	23.3937	32.0565	21.7605	27.5505	26.2731	29.1646	26.9808	23.6975	26.2214	26.1947	27.4853	27.9706	30.0202	27.938	29.0498	26.4265	22.9559	20.3351	19.855	35.9652	24.759	27.5512	27.8271	27.1158	25.662	27.091	29.4049
201209_at	697.628	318.88	387.061	251.46	585.676	738.937	611.36	421.447	921.299	250.566	402.609	436.498	732.014	262.834	468.647	618.59	247.966	753.76	409.861	525.118	264.527	402.168	76.9605	748.215	638.545	673.138	463.105	485.178	466.914	188.35	60.5482	570.148	115.927	122.28	421.169	83.8894	67.065	83.6568	206.419	207.732	108.948	461.055	811.322	262.584	268.227	250.955	193.693	183.562	767.39
201210_at	1661.53	1111.59	1549.45	823.958	1239.4	1440.99	2287.29	2152.64	2542.86	2552.88	816.522	1102.45	1647.34	790.683	1388.93	1553.52	2084.71	1768.24	1153.16	1510.65	1969.48	2138.36	143.166	2050.52	2060.46	1383.43	1841.62	2107.65	3187.36	3241.48	3323.91	2470.16	2481.98	3277.09	1612.14	3390.25	2955.67	4206.56	3183.89	3127.96	1660.68	1677.26	2418.98	2961.79	2838.93	3066.73	1805.83	1433.63	1736.26
201211_s_at	42.1755	59.0194	92.3783	35.9529	44.7233	98.2832	61.7816	16.8188	55.6724	41.7037	30.184	53.1024	120.017	40.891	53.6794	31.6075	24.0789	124.194	33.2777	36.7722	91.2058	92.2792	22.6189	166.596	27.3932	43.7447	216.501	179.288	84.3561	410.314	139.977	195.742	82.3745	309.227	118.542	74.3867	554.525	130.957	335.772	39.9272	53.8956	100.531	54.9326	328.949	460.672	201.107	233.519	138.641	244.915
201212_at	56.6528	61.5324	64.9735	68.5191	44.0962	52.5287	39.0812	34.1687	47.8282	63.0105	33.8028	49.082	55.2403	57.2333	54.304	39.9874	40.1249	33.2763	33.4841	36.2656	39.5723	45.3444	40.5776	70.618	53.422	60.6585	76.0362	39.3533	61.4359	37.3086	36.4326	33.3984	34.9683	35.8698	37.198	46.8865	40.7546	45.5275	35.9267	42.4354	33.2711	34.2543	46.4459	43.7783	51.5135	47.5168	37.3318	41.8704	154.522
201213_at	29.344	31.2694	24.0951	37.7475	31.9252	34.0269	30.2517	24.9733	16.9625	29.1053	30.0779	32.6303	31.5532	31.0154	38.5138	26.5844	23.6578	29.8836	31.3826	25.7348	38.8018	25.3531	29.6236	26.5487	22.457	34.0112	30.6903	30.3152	34.7907	28.6364	27.9892	30.1266	26.3044	26.6333	27.1003	26.9834	30.5654	19.3201	27.3633	25.9483	22.5208	28.1015	24.9371	27.0715	22.996	24.7095	26.2188	27.4692	27.9848
201214_s_at	49.6542	50.8523	35.0028	41.4423	48.4041	49.8706	74.6378	28.2426	38.4638	25.3678	34.3908	45.8371	79.5138	34.8384	46.3366	60.6832	34.5197	29.8846	27.8232	40.6805	45.9339	46.4563	64.5849	36.9116	56.1588	84.5613	45.7262	50.7621	42.5555	45.6169	47.8031	40.9304	40.4705	30.5417	33.1898	38.164	39.4979	37.7645	37.0896	72.5595	41.6453	91.2844	33.4815	73.5662	29.4463	43.4807	27.4016	42.1057	34.2541
201215_at	156.392	233.191	34.8923	48.1637	69.317	65.4867	322.271	116.32	248.473	38.848	56.1789	121.223	418.497	110.224	83.3304	648.733	146.417	1076.28	551.028	532.363	309.087	283.667	91.0472	275.957	207.615	534.774	548.657	258.824	130.065	55.1865	61.0839	41.3607	45.4928	42.1037	42.9018	93.0928	63.3985	39.5386	51.3148	338.621	77.8361	52.0532	64.4064	48.8693	38.0351	45.7377	43.6499	38.0098	45.9421
201216_at	637.098	751.656	551.876	438.392	506.124	689.78	556.385	378.751	608.512	518.502	812.33	777.051	985.299	521.178	874.002	523.074	178.507	647.806	314.301	489.731	363.476	359.002	605.379	562.244	611.141	1009.83	589.189	647.095	568.797	91.3886	92.0948	253.204	74.0048	56.9949	150.1	147.276	53.2991	40.561	142.486	173.896	109.246	363.541	663.822	43.1687	77.8355	60.9344	230.122	120.422	801.058
201217_x_at	1235.87	1392.33	1695.75	1085.89	925.459	1720.2	3867.87	3052.36	3288.61	3013.31	1606.88	1272.66	1828.28	842.859	1059.43	4885.99	4815.34	3444.99	1622.34	2467.92	2670.69	3037.85	1251.19	2250.3	5274.1	3377.56	1738.03	1795.84	1856.87	335.921	143.954	697.138	286.769	94.637	262.636	177.65	179.158	127.993	169.752	1035.63	249.4	1149.73	151.882	178.736	214.675	197.821	362.95	400.828	1586.3
201218_at	190.345	140.676	57.9249	81.2358	201.764	126.294	114.6	112.374	136.584	18.0768	97.5849	188.964	210.408	176.112	352.602	312.025	144.927	300.496	352.239	337.155	272.496	288.653	473.414	405.018	318.704	286.623	568.191	410.613	512.978	437.305	141.912	649.348	243.672	159.76	413.537	210.45	259.284	271.916	383.926	172.887	265.605	235.568	550.432	346.271	395.506	430.027	460.336	231.49	516.424
201219_at	191.099	115.673	82.9205	144.881	163.142	138.62	184.271	205.329	198.71	49.4703	98.0485	190.405	231.385	164.721	351.71	227.367	110.735	290.639	238.735	489.894	332.23	568.071	78.9632	481.396	387.327	387.069	671.847	496.218	638.455	1452.42	1380.36	1022.08	1500.17	1731.37	579.049	3042.55	1533.62	1941.51	2237.68	1477.4	641.264	402.69	2674.28	1340.04	730.604	1374.71	445.131	480.827	117.92
201220_x_at	295.253	383.732	112.293	161.611	304.612	224.656	238.555	130.497	160.725	66.4479	321.034	384.011	305.856	364.121	608.218	360.397	209.601	342.574	611.718	362.252	284.855	294.279	2047.61	411.212	334.201	449.694	591.092	484.219	372.501	557.843	158.965	676.727	275.585	332.158	724.092	556.242	270.756	383.263	283.593	356.991	440.169	445.866	500.676	374.373	691.863	145.367	651.323	342.599	450.16
201221_s_at	107.479	136.983	57.7482	129.844	97.3803	150.706	86.5788	73.6059	37.6226	28.7897	27.6243	69.4522	177.989	53.8907	87.8103	67.9662	20.4904	98.7369	61.9572	55.4995	82.8172	86.7667	24.6973	66.8559	62.479	119.52	69.5092	68.0057	90.868	41.483	19.5055	41.6783	14.7272	25.6468	33.1115	52.6243	41.0282	24.2054	33.4624	36.8442	32.1172	95.7035	142.36	16.9033	29.6639	18.6429	36.5325	26.7637	208.731
201222_s_at	341.559	202.326	212.462	256.378	286.129	412.435	354.025	293.655	438.442	86.4801	124.529	193.13	323.984	123.964	278.167	438.601	237.061	434.219	242.461	391.863	329.049	526.302	66.3139	695.799	552.4	369.857	782.054	607.42	1036.81	563.16	332.596	498.92	497.98	730.454	352.833	769.348	493.554	937.945	771.62	763.98	220.409	295.721	1076.18	677.817	629.924	843.032	212.177	276.929	271.374
201223_s_at	1354.01	1333.25	1530.22	1226.77	1277.94	1140.94	1426.43	2088.71	2212.32	588.867	834.239	899.839	1174.07	592.059	1130.61	2394.21	1961.27	1449.39	1526.14	1732.22	2049.64	2350.3	429.786	1819.9	2732.67	1688.37	2117.26	2121.21	2172.01	1667.31	1303.5	1198.78	1130.82	1411.89	924.332	2517.97	1458.86	2445.56	1405	2729.02	963.355	1047.13	959.193	1464.65	1203.73	1851.38	697.059	776.52	1215.31
201224_s_at	104.448	82.0574	94.3569	98.1297	67.5581	109.103	196.171	127.18	93.5552	104.922	86.0571	98.5477	138.835	88.2552	89.446	114.714	68.6379	116.92	137.668	99.0468	106.868	94.6852	48.9666	104.013	107.657	113.795	112.94	76.9772	74.6454	30.2674	37.2326	20.3121	31.7811	22.252	29.3424	26.8891	32.3686	49.3416	21.5683	45.5878	79.2266	46.9506	45.5803	40.2774	23.5089	23.4196	42.2507	40.9792	28.6347
201225_s_at	1449.79	1469.1	1234.49	1223.85	926.161	1341.43	2435.69	2716.65	2667.27	1837.86	1419.5	1526.63	1878.54	1497.5	1360.24	3583.74	3877.7	2843.05	2340.7	996.97	1747.4	1878.84	154.043	3203.68	3271	1781.33	1766.57	1589.1	2341.44	914.572	120.823	1073.38	202.76	199.054	791.839	1001.24	254.493	142.925	366.782	629.49	436.531	717.482	1642.35	34.3809	480.9	648.18	875.253	597.742	1973.75
201226_at	95.6655	54.8597	40.6396	54.4798	46.1901	125.216	85.02	49.3462	59.0491	38.4652	22.9874	47.1247	86.2572	29.8296	83.3801	183.686	47.5521	141.11	46.9945	91.6943	150.865	144.121	67.4569	241.323	168.334	233.097	215.644	203.582	148.538	195.367	46.513	280.096	77.5408	160.039	109.52	86.7699	118.673	76.7839	127.203	55.4345	44.5918	458.739	33.5855	86.9013	96.3896	22.2823	39.7385	127.053	84.175
201227_s_at	592.618	557.613	292.548	427.265	484.742	665.241	957.294	549.828	850.168	631.842	486.305	551.945	800.478	393.799	605.409	923.567	575.778	562.964	794.279	789.084	755.599	670.527	124.437	765.029	976.781	829.985	674.98	810.45	626.903	392.044	142.823	603.038	297.998	360.964	387.344	197.684	267.559	215.353	256.632	415.542	219.598	911.873	1247.59	259.611	252.941	76.3547	232.489	226.387	293.232
201228_s_at	32.8161	35.8324	46.526	37.6969	46.3981	39.1214	28.7955	16.49	29.4966	16.6783	24.237	29.6707	27.2574	30.4507	38.5259	30.6129	16.15	25.0074	18.9763	35.575	38.4648	36.4964	23.7042	31.1591	31.3032	36.7622	60.0996	57.0101	46.036	226.127	40.5887	170.176	42.8713	85.3324	47.5621	60.4187	84.7693	71.1443	79.2191	77.4886	21.0318	65.7999	41.1715	152.981	181.908	35.8666	41.1525	49.6756	20.7573
201229_s_at	126.714	176.34	234.909	176.131	128.496	138.332	163.263	208.077	271.034	271.302	347.535	153.968	129.825	163.118	76.3585	227.972	517.456	88.235	78.5346	153.761	213.623	174.777	189.074	166.572	290.775	145.102	173.665	145.192	179.785	371.33	189.219	294.49	302.948	282.29	179.553	177.868	155.506	410.023	167.109	349.932	139.037	220.106	131.084	184.317	177.373	142.19	90.6062	155.42	109.614
201230_s_at	52.5057	41.2218	33.8249	38.9284	53.3978	81.8393	52.0319	18.3372	24.3249	28.8317	16.3928	31.0723	58.6493	20.541	47.2018	63.0638	14.9429	55.155	29.5256	54.4618	56.7631	69.8458	20.1068	85.858	58.4675	77.2987	100.855	89.5929	67.2929	110.356	38.3388	158.111	39.6167	163.307	100.991	54.0902	141.342	43.8004	80.7599	38.2056	22.7716	95.9147	45.3539	97.2846	126.858	18.6222	49.8083	33.7968	25.0361
201231_s_at	115.718	76.8643	52.2698	58.0115	78.8723	123.05	180.152	71.8947	117.073	31.1942	29.93	79.0348	105.175	67.6539	183.215	288.385	99.8288	218.453	207.703	167.324	267.076	280.485	192.15	138.423	221.431	388.307	189	355.631	201.094	76.5283	36.0111	45.9178	26.1391	40.4457	27.8517	53.2122	56.9237	20.0407	34.0146	65.853	24.3975	71.8537	97.8415	29.9141	70.7941	20.7648	40.0324	42.8623	390.439
201232_s_at	77.9173	110.412	55.0059	107.625	83.304	210.29	198.074	103.931	140.972	51.7845	25.5481	86.448	358.69	39.2628	155.224	237.669	28.9355	182.211	186.838	149.44	167.006	204.475	47.3985	271.86	228.294	359.297	249.259	190.271	237.418	107.495	41.6959	174.405	36.175	48.85	108.357	58.948	49.7001	55.9034	40.7207	45.9182	48.8551	270.455	112.432	43.1607	41.4427	14.5907	58.1084	147.487	516.25
201233_at	225.231	185.639	134.657	153.918	260.571	267.878	192.985	97.946	155.428	96.0907	77.3558	171.494	383.173	101.209	288.331	255.75	54.8471	267.896	186.911	194.32	122.209	161.866	80.7235	335.45	239.756	391.817	378.801	235.932	412.514	182.462	77.6435	265.97	63.108	146.304	168.511	69.3627	67.3894	67.1583	73.6927	90.5289	82.0673	239.247	466.596	147.361	96.3399	73.0949	79.2224	180.641	769.886
201234_at	36.2852	34.8772	68.9148	64.3922	69.9227	68.1532	75.1139	71.4111	23.5222	37.9301	30.6628	61.6678	130.85	42.2881	85.2374	102.291	50.6552	72.1275	58.6649	74.1633	104.932	141.284	75.9323	342.742	174.902	475.468	288.511	131.669	141.227	74.0719	81.4154	115.981	74.019	55.3931	135.991	69.7443	73.1167	60.5022	75.8624	66.8198	67.3838	292.028	48.2033	106.372	53.7246	35.729	97.1509	52.8302	60.8105
201235_s_at	29.9369	28.7814	35.1015	26.1848	24.4955	29.9501	28.5231	30.424	15.2788	30.4303	22.9019	27.7991	33.1313	26.8691	29.2925	30.1393	25.4516	30.2017	30.2986	28.8581	27.9396	31.708	27.3222	24.5093	26.1705	27.621	27.8538	25.3961	25.75	29.4249	29.5844	42.652	29.2563	30.3542	33.3549	28.1955	28.6317	30.8266	23.4586	26.2731	32.8042	31.108	23.675	28.7983	26.4682	30.2999	30.229	27.5598	28.7271
201236_s_at	679.942	788.954	615.325	527.397	871.511	1188.64	122.277	144.682	70.3325	295.935	729.768	939.339	1270.03	930.031	903.217	21.3346	10.6797	77.9406	206.4	73.9109	51.3233	16.314	809.55	130.449	171.432	239.791	73.5833	77.6391	62.5461	451.267	83.5556	835.036	131.946	255.012	722.448	169.802	191.116	165.354	48.8721	96.5892	473.825	682.144	559.538	317.262	155.688	471.855	452.317	479.691	618.272
201237_at	553.619	952.115	555.977	1164.85	868.114	872.568	923.455	1101.53	1222.87	516.641	630.193	875.151	1171.38	687.454	1155.89	1510.08	1673.43	1400.78	1850.79	843.739	1233.43	1508.39	811.676	2266.03	1602.73	1272.48	2050.71	1570.32	2228.43	956.109	337.966	957.728	440.551	589.071	1040.4	1524.17	467.426	818.039	884.515	849.269	860.035	627.572	1486.32	697.797	883.265	1481.21	1409.46	1050.01	1652.22
201238_s_at	347.146	324.791	250.527	357.571	530.12	409.073	398.832	536.214	421.895	263.389	257.51	426.175	539.371	339.354	699.872	520.746	348.255	556.318	537.812	418.058	355.626	566.981	516.211	1100.29	771.638	622.257	949.98	524.932	977.592	578.155	144.378	676.685	336.949	429.047	630.447	668.341	326.793	425.855	402.255	505.551	379.688	432.825	511.868	484.348	606.731	388.895	640.657	382.291	598.499
201239_s_at	131.797	186.411	97.3142	170.087	134.385	255.732	161.279	94.2461	77.0669	69.567	88.5711	177.401	291.587	134.276	285.605	142.528	74.8438	211.328	156.851	101.697	107.734	98.2242	113.361	351.115	131.934	264.5	305.65	278.857	189.4	192.278	45.3489	173.893	55.2677	60.5439	163.565	78.0833	167.603	36.0331	77.9595	77.3354	78.4611	316.832	123.057	57.6262	78.1786	80.1662	102.312	221.993	739.546
201240_s_at	530.032	607.399	357.522	497.739	509.086	814.403	635.622	650.441	919.759	229.594	448.926	525.833	863.565	382.219	515.952	818.308	434.434	776.231	760.64	383.788	382.695	465.146	494.317	923.521	889.195	740.193	538.719	604.853	734.886	263.762	46.0538	570.462	53.9996	124.508	332.854	153.126	84.3984	77.8841	114.79	267.171	203.494	327.14	372.61	55.9325	136.539	165.548	195.774	193.223	1246.16
201241_at	201.216	121.221	76.2556	154.821	144.936	236.32	573.829	435.518	672.765	387.063	109.734	174.592	374.39	96.1302	235.272	870.164	411.939	835.755	504.406	424.409	334.038	422.087	92.6249	851.132	576.33	620.694	610.414	465.931	957.578	207.191	35.7839	550.595	47.0738	43.8433	281.12	103.512	65.8514	52.5326	100.955	199.824	98.3022	438.513	59.9553	35.4623	142.161	28.8254	128.66	144.269	429.106
201242_s_at	60.9493	52.3522	93.4799	70.4356	64.6492	79.9228	38.1801	59.5137	77.9055	34.6421	32.7286	38.8154	29.5626	36.9666	63.4651	107.295	64.4435	49.6625	19.745	88.4075	71.3079	159.845	52.9087	62.364	140.516	79.3323	94.4363	46.9524	55.2315	31.6678	30.0228	19.1951	27.0774	19.5807	18.6487	39.5015	38.4183	48.0662	41.9639	130.763	24.84	27.3044	25.7109	33.2461	64.6839	27.1628	26.4617	20.4878	283.331
201243_s_at	785.469	584.016	232.713	798.842	469.743	534.655	1104.78	1450.26	1348.16	66.0295	426.566	630.899	522.437	915.008	776.95	2116.08	2916.85	2644.79	1761.25	989.093	1015.81	1300.25	119.353	3106.54	1196.87	1168.73	1579.22	611.249	1416.83	321.525	66.7312	72.8923	23.7841	63.0346	158.58	84.0249	155.638	12.6528	137.662	270.839	114.714	163.464	56.8591	49.3424	284.036	16.914	420.528	198.535	920.907
201244_s_at	56.5525	63.1905	33.0959	83.2726	55.934	109.252	62.2314	36.251	37.2621	43.2802	28.0552	61.5002	177.873	29.4956	97.1907	96.4481	26.1875	142.538	45.7805	56.885	99.4352	78.432	124.029	167.557	100.597	192.346	135.953	124.438	158.299	42.6793	26.0123	175.633	21.7318	21.8777	161.916	34.3437	36.8604	17.5004	51.8685	24.3448	43.9202	145.478	53.5866	43.9684	61.4112	32.4047	73.5498	50.7884	77.7055
201245_s_at	23.4671	28.7087	23.1806	20.5876	21.4628	23.1692	15.7598	29.9235	19.9498	9.0902	12.9555	17.0157	26.3204	12.1092	20.3017	35.1583	18.3804	29.6553	17.0882	29.4289	43.4844	37.5557	19.0685	28.6144	61.7971	62.2777	28.7849	31.0419	29.3208	22.3905	21.0995	21.6928	14.7052	29.9684	25.7767	18.7107	20.1121	21.6296	20.9853	17.828	16.0019	41.3145	19.4385	20.7876	20.8752	15.5764	20.6459	20.7572	16.2532
201246_s_at	22.3193	19.541	21.9033	21.5272	24.4586	23.8933	22.491	16.8894	10.4719	19.8332	13.9617	18.3617	21.8513	16.4073	22.7089	20.3391	15.5195	23.3365	21.9767	18.6327	24.9854	17.6641	16.5455	23.01	19.2264	22.144	26.4463	29.079	24.7346	29.2393	25.0605	39.8243	18.5457	35.9534	23.4291	21.2208	21.8682	18.3183	25.691	16.5174	15.2534	25.2966	23.1838	20.1048	24.9018	22.7493	21.3145	22.0172	20.9219
201247_at	30.2709	35.3437	30.1956	34.0674	39.5808	39.7171	27.6076	24.7572	17.07	15.605	10.7397	17.9743	24.0805	16.5439	24.3956	29.879	14.7979	50.2435	33.6172	36.6436	36.8522	43.7057	19.3059	89.0072	29.1916	47.4522	85.379	74.7901	50.5461	25.2901	18.3824	82.4685	20.0834	22.9122	31.615	28.6064	27.0632	13.3406	25.6351	29.4785	19.2724	89.2595	27.5858	22.1071	22.5356	14.2299	19.6481	34.4487	42.0979
201248_s_at	35.7177	31.2339	27.5285	29.9327	31.2517	35.2397	42.6282	28.4064	31.6957	20.2313	24.7951	28.2651	30.3035	26.0828	32.5679	30.8319	21.1203	31.1746	26.5521	31.3561	25.2437	29.3721	26.0231	46.4516	27.4783	37.5852	44.0658	46.4658	43.759	30.5036	24.2331	41.4471	25.0374	26.5496	33.6301	25.8451	24.7357	22.4685	22.2101	25.8879	25.005	37.5042	32.6091	27.6285	29.6018	18.5837	21.8629	27.2589	32.812
201249_at	26.9004	27.0822	23.3406	27.0072	29.488	31.8908	26.563	27.2991	17.7172	22.7718	27.1724	29.1198	27.8117	29.3302	32.4403	30.3786	30.4449	30.6291	28.1968	28.0339	29.4105	32.1833	33.9979	38.1034	35.8868	26.1402	32.4748	38.0285	31.9675	588.252	304.763	932.731	519.244	883.247	580.989	157.966	899.755	314.033	421.034	248.558	451.227	568.083	116.593	267.487	528.127	73.112	221.471	341.322	27.5581
201250_s_at	63.4114	54.1375	43.1845	63.0929	71.4088	85.7078	23.8501	50.9322	27.165	12.9881	15.1597	33.9722	66.5452	30.9864	42.6106	23.3566	14.4397	27.5979	31.309	37.7179	40.7227	72.4289	97.1849	160.023	92.948	39.1921	61.7462	66.5974	86.7917	1490.64	1414.11	2290.91	1411.96	2257.46	1352.94	1468.14	1985.79	4336.63	1414.35	1777.16	2030.61	1462.26	1658.5	2152.99	1476.42	1958.06	1234.18	1066.86	27.4713
201251_at	164.122	117.333	142.511	165.871	201.459	213.732	253.146	162.144	118.361	64.3315	70.5009	175.068	322.839	147.345	280.097	396.474	83.692	240.144	86.5446	181.573	347.955	327.591	125.892	370.173	359.242	739.259	360.912	586.163	194.608	96.0385	97.8449	100.575	89.0842	67.6684	50.6634	92.6432	71.5977	132.516	100.025	156.667	66.2626	61.9029	71.8722	102.842	91.9241	92.0584	114.265	77.0611	462.929
201252_at	50.0655	40.1246	35.9895	42.6048	49.8783	73.5922	19.8408	24.7864	54.5497	18.9802	18.3497	31.1166	56.9955	20.4738	43.7828	73.5743	28.8633	48.7477	28.8812	29.0462	80.5702	52.7006	47.6463	166.354	89.7319	78.2081	113.508	111.523	75.5864	102.646	39.7942	204.368	38.0686	164.93	95.7229	66.2284	57.3638	44.6641	85.0518	69.6794	25.7053	306.345	79.5179	34.5239	97.8824	33.2189	45.1295	79.082	184.575
201253_s_at	38.0168	31.6589	20.5025	32.3229	38.4403	47.3478	11.4529	9.18015	8.26607	11.7178	8.34052	16.7537	34.2789	9.81025	28.0894	35.2942	9.53126	22.4936	20.2856	33.9401	71.4591	58.3899	14.7084	42.462	36.234	63.9433	84.417	94.547	35.5745	259.435	115.861	300.015	152.544	703.409	91.2157	206.457	439.766	88.199	311.458	128.552	23.5806	121.077	685.603	177.9	331.303	109.469	60.2759	34.5851	18.7262
201254_x_at	3763.96	3063.02	4195.6	2727.47	2661.48	3029.76	6518.42	4985.19	4791.14	4226.6	2092.92	2409.37	4061.8	1638.11	2419.93	6848.93	6895.98	4962.01	3599.07	3051.82	4197.5	3723.32	2070.77	3949.64	6822.77	4508.97	2566.48	3632.97	2055.86	740.761	431.103	1048.75	1091.59	443.802	969.743	717.196	294.595	844.307	593.134	3363.46	1141.08	1654.41	1992.11	382.03	674.634	1574.33	1343.48	1326.9	3684.66
201255_x_at	185.909	94.3654	195.957	103.14	83.7713	237.461	131.433	55.8994	120.743	58.073	77.874	114.7	206.141	68.0083	158.541	143.495	95.2478	133.441	56.7739	306.844	285.877	371.14	92.7336	188.87	214.262	238.129	344.519	341.908	130.353	605.469	568.095	703.866	648.781	1193.47	192.044	901.62	660.294	784.948	850.92	876.078	102.458	577.006	1095.83	738.396	755.655	375.114	185.239	180.495	123.974
201256_at	1876.15	1490.53	1477	1227.3	1451.85	1321.09	2176.06	2138.71	2838.38	1637.86	1101.17	1450.63	2018.81	1064.27	1871.64	1929.38	1774.44	1977.38	2251.73	2012.12	2077.45	2083.1	1542.61	2915.12	2645.08	2086.27	2556.73	2682.7	3043.57	1491.67	899.855	1375.18	1315.33	1783.87	988.321	2221.05	1275.17	2532.53	1925.06	2364.89	1223.59	1069.39	2658.33	1801.01	1509.19	3174.24	1352.81	1397.09	2254.23
201257_x_at	5003.14	4520.3	6072.07	3949.98	4242.11	3372.4	8532.6	6411.63	5037.36	5609.52	2688.45	3443.13	5667.51	2345.01	3933.44	7608.13	7556.66	5825.49	4881.64	4567.13	5551.22	4784.43	2047.07	5839.7	7000.83	5757.32	4038.48	4787.01	2891.9	1230.6	699.08	1570.1	1446.44	755.519	1251.22	2003.43	638.549	1791.76	1013.12	4785.33	1918.33	2354.84	2333.1	866.373	1238.37	2712.75	1823.8	2136.38	4789.02
201258_at	4703.97	3544.82	4071	2262.19	2556.53	2580.89	6656.39	5622.78	4549.12	4945.89	2319.14	2730.05	3936.85	2195.99	2770.64	6374.42	4538.03	4417.08	4604.45	3088.76	3592.19	3393.45	2624.98	4278.31	6593.51	4940.98	2642.02	3104.69	2410.04	939.221	159.548	1231.8	561.259	311.415	780.937	888.346	239.857	452.35	589.606	2904.55	1159.05	1520.83	3347.23	380.86	418.02	2813.42	1035.73	1736.3	4553.4
201259_s_at	75.1935	111.165	48.428	85.5506	84.3602	208.2	55.6616	33.2324	24.8484	21.7867	28.7446	53.4546	129.089	34.2972	64.1558	108.859	32.8405	140.905	97.4648	69.8696	83.2403	101.836	51.8502	186.371	73.4326	117.753	151.522	124.517	138.761	39.9625	22.6998	34.8738	21.5724	28.5741	39.3381	28.5182	30.4432	14.8622	24.8611	40.3815	15.7234	37.1804	31.9751	20.1565	24.4851	17.3223	25.3865	26.917	173.895
201260_s_at	410.241	377.821	328.169	312.92	364.094	499.935	445.786	640.988	812.807	128.169	247.758	287.497	543.103	162.35	312.731	893.852	746.377	888.313	996.1	566.72	421.159	617.007	632.436	793.551	758.817	569.461	532.205	527.471	518.067	63.7862	22.3941	85.4196	15.7113	14.2459	84.0416	50.6476	46.2446	7.99354	28.594	196.74	42.5274	82.177	36.2574	13.9337	93.5763	14.1274	105.207	82.4106	276.904
201261_x_at	26.1504	24.7481	22.2846	24.1149	25.7846	27.5921	25.5649	24.2654	13.3387	21.6596	17.3714	25.8253	31.8868	26.1233	30.74	24.9761	22.9572	32.2515	33.2869	27.0059	22.9969	26.6371	23.9364	29.4115	19.4367	25.3199	33.4667	30.5539	28.9498	27.8197	28.9466	34.3839	22.8947	27.9979	31.3271	24.887	27.1457	17.7242	29.2728	24.893	23.6204	26.2567	36.4986	26.215	32.0638	21.0762	25.5289	37.288	30.3249
201262_s_at	27.8088	37.2939	57.1922	33.8214	26.6748	25.4722	48.7694	42.9642	114.734	55.9405	64.4494	34.3975	27.8702	33.4514	23.2988	45.3355	67.4553	34.639	30.6199	62.4443	53.5574	52.7831	39.7409	44.6595	105.22	46.2968	41.5117	40.0777	38.4034	42.9931	39.8872	33.1157	51.4587	43.8544	35.6581	49.9624	53.1362	133.011	41.699	76.1725	59.6401	42.3052	42.4209	52.3766	39.7202	54.1337	40.4123	40.9505	33.0339
201263_at	709.729	331.875	519.594	257.731	424.75	307.2	627.695	704.273	855.681	326.726	400.58	377.984	564.298	251.343	359.276	949.045	921.253	1179.38	664.383	592.188	525.732	628.153	117.22	1357.07	928.681	669.207	904.598	848.278	1292.52	494.338	111.608	564.285	93.9144	181.545	404.384	234.591	268.292	195.903	278.591	396.577	190.238	425.893	150.478	188.614	423.581	503.033	233.255	361.21	1205.21
201264_at	68.3436	48.3788	90.2521	39.1159	32.3486	54.0803	34.3785	25.1934	53.9259	30.6518	45.2622	35.636	31.8942	32.9595	33.8944	55.9623	25.6315	32.3535	19.3335	38.216	48.9085	75.3739	26.691	56.9045	86.1472	91.3992	39.8136	76.579	42.7273	34.4115	43.5863	62.6748	25.3761	55.9624	34.4974	38.3277	43.9029	40.0945	31.7239	40.0073	23.9285	111.125	38.8262	27.6365	33.8615	18.8101	17.5301	31.9379	65.2835
201265_at	37.7465	38.1352	30.5443	46.1201	41.6616	44.0633	47.4109	39.0121	20.8162	43.7293	44.7395	48.2164	46.6313	51.4541	50.349	41.7882	46.0549	55.099	46.4791	37.5366	48.0992	41.4354	46.4672	48.7034	42.2698	50.4386	65.8235	46.1049	41.8602	51.2124	59.1175	62.5152	52.8335	52.636	49.5053	56.5804	44.5105	36.3843	43.8644	55.9801	34.7001	67.5596	40.649	46.7025	55.4855	43.5726	53.4855	39.9082	43.5863
201266_at	611.101	277.359	256.371	254.027	312.748	481.253	629.678	453.658	700.802	63.164	252.665	387.984	553.691	314.88	514.397	1007.79	802.322	834.444	696.569	848.752	1049.1	1251.56	584.622	1081.5	1288.96	710.783	1504.71	1450.22	1958.79	968.218	770.242	1020.31	733.523	951.336	849.402	1248.53	1141.45	1978.23	1334.29	1183.05	597.071	565.917	719.884	1623.23	1272.66	500.455	708.271	585.03	420.104
201267_s_at	64.0108	50.7841	53.3006	61.2344	58.0481	61.5401	59.7484	74.5264	128.592	129.434	76.1753	58.7763	61.9245	49.4469	51.1673	102.295	93.5083	75.4636	81.4325	109.036	106.729	91.1171	82.6509	80.9481	125.247	99.323	90.4942	101.593	104.332	88.8891	77.2411	103.78	79.1087	88.0928	84.1714	122.299	88.1347	207.274	91.8706	78.9881	66.9774	187.028	103.224	71.935	75.7639	118.665	74.3126	81.11	66.0109
201268_at	461.348	532.409	557.294	200.881	246.668	618.077	820.923	794.731	909.891	501.327	371.249	362.742	584.353	202.505	394.104	1746.3	1548.09	963.188	538.353	1052.66	1110.07	1257.6	198.989	572.919	1540.2	1081.17	580.244	716.876	806.772	67.7511	101.229	108.184	53.7311	29.9417	67.4418	80.7832	38.3913	34.9715	80.0152	210.542	40.8734	377.118	115.858	45.2769	69.7064	49.5132	82.3258	78.5428	772.168
201269_s_at	38.9538	28.2828	46.9313	26.0376	27.4308	25.0123	21.9188	21.4441	43.4568	21.3567	25.7564	20.1396	17.2416	20.8522	17.766	23.9768	33.0739	22.4544	19.8135	22.6206	26.7434	24.3587	18.9855	19.0884	22.975	22.4227	26.6208	20.8992	19.4847	22.6382	18.6481	29.6007	18.094	21.1866	20.9437	22.8502	20.9422	23.0903	24.3755	22.5554	25.2445	18.7784	20.4445	21.9215	23.019	24.3743	21.7178	22.7373	17.5554
201270_x_at	457.486	475.638	364.08	362.318	442.38	800.81	704.277	413.022	769.61	315.498	386.069	491.945	613.359	389.573	634.889	1311.1	754.244	1184.49	828.914	1143.94	895.869	896.16	363.302	1161.38	1229.37	1100.32	898.436	907.489	916.168	768.707	342.519	550.234	266.141	272.776	312.476	409.737	618.631	183.278	572.15	662.724	188.343	479.899	107.596	197.787	457.758	691.514	206.283	365.927	650.835
201271_s_at	53.551	67.1388	74.4091	55.6128	41.5322	70.6372	61.3963	63.4548	74.156	46.3591	53.2244	56.3858	63.7147	60.1001	49.5969	86.6755	58.5544	73.3883	59.2368	72.8285	115.474	104.386	64.5893	127.804	179.836	148.354	90.4835	85.7271	83.6776	66.6208	68.8763	57.3726	48.9415	59.4997	112.469	48.5648	63.2131	62.9992	39.1467	53.8961	63.0737	193.43	58.1741	54.5198	49.3742	43.1322	32.7237	62.0337	34.3889
201272_at	611.008	425.154	291.036	346.895	374.101	742.625	772.467	929.657	807.343	542.523	413.477	453.524	472.508	329.413	657.357	696.134	467.463	1097.48	938.915	654.246	590.659	542.498	118.427	626.199	457.098	685.353	477.476	449.754	458.838	55.3901	101.018	163.56	72.4257	60.369	51.844	59.3145	53.8279	48.4376	48.5018	444.662	43.9913	123.354	295.599	109.568	93.1705	79.8837	162.187	96.9622	1212.74
201273_s_at	881.85	785.199	743.725	822.59	771.955	1097.85	1760.21	1526.51	2418.95	809.139	888.802	856.361	1283.31	534.646	881.911	2131.84	1973.79	1671.58	1623.35	1113.11	947.307	1057.84	1023.13	1852.85	1924.84	1321.79	1159.69	1412.56	1106.86	552.609	72.9738	722.156	225.294	226.303	519.742	643.546	161.858	218.501	250.34	1019.87	466.45	502.142	361.941	174.861	323.541	552.606	581.109	500.96	1264.36
201274_at	219.925	210.188	148.859	137.423	201.487	185.191	319.95	278.827	360.117	106.162	154.583	259.507	428.497	211.128	324.295	515.118	206.8	573.395	397.927	364.355	341.554	432.62	150.967	725.881	477.231	583.379	642.903	492.354	725.83	115.907	59.2389	287.005	54.9323	65.5369	221.092	110.986	84.9162	64.9482	96.3235	118.412	80.2213	446.865	279.937	80.1259	72.4161	55.4267	113.153	137.821	645.021
201275_at	399.798	201.298	179.018	304.758	269.296	327.729	877.759	502.784	681.469	231.461	211.354	371.368	674.675	281.55	473.762	1412.55	978.303	792.674	731.119	797.627	983.219	1130.68	202.406	1145.87	1066.41	1413.96	844.629	968.45	770.23	205.482	144.052	533.8	130.197	58.4002	562.609	116.73	63.947	131.353	106.288	247.757	322.104	1522	3690.93	97.9069	266.103	218.217	179.803	148.945	472.515
201276_at	97.4601	135.56	78.9796	177.325	130.151	222.105	64.1397	54.0442	39.4801	27.1334	41.9855	105.27	172.799	88.5563	191.141	70.4464	34.1642	129.094	104.143	91.2492	220.736	164.346	374.347	267.267	92.3712	186.876	275.02	646.686	260.261	610.697	465.757	559.716	298.31	1183.3	206.071	406.391	1030.73	336.492	669.728	244.055	177.073	191.257	497.78	433.863	763.926	313.736	216.137	201.174	160.614
201277_s_at	184.458	124.311	59.955	73.6719	115.461	133.788	262.613	111.377	147.098	29.6372	28.7959	85.8916	207.212	85.892	106.195	327.158	104.258	333.354	129.416	133.459	216.326	253.111	95.8458	436.524	291.698	297.376	323.681	322.798	470.625	91.4582	32.8627	341.179	33.733	27.5683	192.58	64.6253	51.7525	18.0486	56.0157	51.6908	49.9592	324.187	97.5551	22.1918	46.7423	26.2594	51.399	86.5357	214.841
201278_at	468.855	530.027	193.325	393.044	473.925	423.604	361.773	226.306	360.986	236.506	580.005	975.276	1338.23	934.556	1247.22	390.911	324.557	707.916	478.654	635.045	394.943	449.544	173.442	825.534	791.23	1338.37	1032.98	295.368	900.865	102.895	152.577	154.58	135.792	64.6488	64.2499	145.848	112.852	138.495	111.304	381.852	239.945	88.3304	589.388	114.407	268.132	114.838	202.511	170.582	681.313
201279_s_at	30.1874	47.7182	37.0216	45.2976	50.9802	44.9247	45.0861	42.0595	15.0652	31.9769	39.8862	54.0785	72.397	57.539	51.4745	38.6622	36.8596	42.8881	38.5072	37.3141	33.9345	34.4378	44.4768	39.9949	52.8394	45.6226	46.5965	36.533	41.2683	33.3966	42.7579	38.3374	34.7565	42.781	36.8727	34.2787	29.4552	35.5465	33.1292	37.4978	28.2854	40.7256	35.2574	38.6442	36.6492	78.1285	34.7639	33.4672	44.1077
201280_s_at	67.242	73.7918	72.4387	80.0403	80.3148	90.1181	151.265	95.4158	129.328	164.864	125.149	143.193	234.355	119.591	119.864	122.411	302.02	80.6367	90.2547	147.618	103.691	133.095	98.5311	90.3243	242.378	220.122	119.326	94.0312	97.1132	69.0358	99.0308	65.4285	92.9069	76.9629	63.3207	110.089	87.3179	385.635	94.7656	260.542	182.361	90.2499	71.4883	95.8129	56.5835	101.474	74.836	131.207	104.009
201281_at	27.7369	31.1349	24.1032	30.3044	22.3069	33.7887	26.9389	21.9292	44.1737	21.5037	23.6596	23.9274	30.6851	19.3941	23.2797	36.1959	27.26	25.4895	19.5539	24.05	41.2363	40.066	20.5855	34.4659	56.9054	64.9033	29.8247	33.6145	24.5747	23.8034	21.2281	38.8226	17.9833	23.4757	27.931	29.0895	29.0385	28.2521	23.2166	32.394	22.1396	75.5658	24.6898	22.9646	21.3615	24.6053	23.1797	24.365	37.3233
201282_at	36.4955	37.7603	52.615	32.3441	40.1564	37.626	40.2891	25.965	19.7685	28.7594	21.534	30.3336	31.9065	29.7284	41.4495	31.9975	19.9689	34.8214	38.9864	43.2046	41.5942	44.3332	713.537	29.6675	17.0902	53.8331	53.2742	41.2633	51.5066	67.3289	53.699	158.704	34.0234	84.2553	53.7617	49.2287	54.9757	50.8474	55.9425	43.7611	36.2955	105.924	28.3783	36.0103	56.0732	31.2462	38.4606	51.896	41.4953
201283_s_at	87.7783	91.3625	111.948	71.5153	51.4559	52.9118	61.5323	65.7075	95.5313	91.3356	143.754	70.5743	55.8778	58.9871	52.3564	61.723	128.936	54.1685	38.0676	61.5956	84.6281	85.2977	65.5477	53.1534	158.063	51.1822	50.2117	61.28	55.3677	50.1627	74.5392	46.9492	75.6622	76.6732	44.1027	78.1282	62.0242	178.59	86.7611	56.6119	113.194	52.5432	68.5314	60.6338	60.9443	77.9549	43.394	54.2071	70.6237
201284_s_at	57.212	78.1244	67.7746	47.5502	57.7227	73.7455	71.8719	58.0398	41.3836	53.4765	66.4441	66.6793	64.0072	63.5257	73.1693	92.4671	54.9281	69.4391	74.8778	90.7392	131.894	117.275	78.8589	96.0915	186.517	137.76	78.6652	107.802	98.8107	78.3122	100.115	149.845	63.6298	78.4367	105.327	85.1943	109.218	61.6429	59.1882	85.0912	71.4296	264.944	84.0214	66.8188	67.7782	55.4124	49.0343	55.2186	315.619
201285_at	1705.77	1677.4	1524.36	1755.3	2550.21	1464.66	1982.42	2007.22	3260.32	2072.25	1300.16	1622.16	1999.5	1189.47	2239.25	1532.24	1560.44	1468.98	2025.03	2414.39	2444.26	2746.71	1060.29	4648.49	3733.05	2247.02	2750.13	2639.23	4066.47	8586.88	8065.53	7686.76	7119.5	9161.31	4477.61	9036.42	7324.77	9558.14	7169.53	8910.99	5381.67	4674.71	9832.19	8221.89	7248.16	9659.78	4413.7	5825.1	2173.22
201286_at	21.1916	20.8561	22.6634	23.6694	21.9303	22.0926	27.8279	20.4629	29.1148	19.8733	17.9338	20.9607	24.7804	21.3795	20.3162	23.0328	22.8755	24.5798	25.6822	18.0859	18.1533	16.9429	21.8278	22.0781	25.7866	24.877	22.1832	21.6944	21.5034	36.0073	24.2229	22.0686	23.5391	29.6948	23.1981	21.7575	24.6814	21.2096	24.5385	17.4733	16.3764	17.9778	27.4143	22.4979	29.9949	27.6387	47.311	324.721	29.7856
201287_s_at	40.7249	49.4278	40.6306	49.0079	53.6412	47.1501	51.0431	38.023	20.0628	52.9523	28.4399	46.8406	52.6269	55.9475	57.4877	42.7864	43.3722	52.4878	47.7336	34.9351	34.0046	37.3097	47.4856	57.9804	43.4327	56.3053	47.9705	56.3746	54.8308	77.3317	47.103	52.0604	58.8079	56.6593	40.9515	60.6787	59.4277	29.3561	77.2441	32.515	29.7632	48.6504	46.8286	34.8804	51.0877	41.7211	68.6126	640.617	48.8022
201288_at	1743.08	1468.27	2429.96	1582.98	1893.5	1895.1	2764.43	2707.08	3269.49	2037.26	1961.26	2023	2622.09	1368.14	2380.53	5003.31	5564.31	3306.59	1977.26	2289.36	1986.75	2358.01	4323.51	5009.13	6679.41	3438.3	2220.47	3190.92	1443.44	65.9624	191.335	150.816	300.063	54.9592	147.487	126.613	183.808	41.9833	122.017	886.888	318.449	305.608	248.264	81.5015	413.85	276.745	975.395	451.211	2155.13
201289_at	38.0721	32.8237	27.2354	35.4307	33.243	41.3869	40.8907	34.5351	26.4907	35.8671	37.4157	38.7671	34.3312	41.6723	42.1953	74.268	37.9344	42.8592	58.431	40.3051	42.7586	55.1159	42.9421	43.9951	34.7496	42.3509	50.8786	46.2494	44.6299	46.0581	44.4799	50.5009	42.5045	39.0359	45.7223	39.2054	41.1743	38.8511	36.3508	49.4675	31.1949	46.9397	49.4907	40.6005	44.7025	42.6581	35.8822	38.5566	42.5455
201290_at	1551.66	1296.09	1114.8	954.27	1406.08	1198.87	3317.26	2964.13	3040.28	1374.38	872.014	1314.2	1957.98	1023.67	1706.67	3501.63	3858.43	2714.81	1965.67	1371.56	1495.98	1762.65	785.619	3546.79	3895.79	2491.03	1646.98	2143.53	1444.21	410.676	42.7605	733.235	246.465	123.045	472.773	468.188	131.382	48.0135	332.385	1097.16	428.987	540.807	1356.63	129.908	313.935	721.629	743.384	561.659	2489.33
201291_s_at	205.109	195.008	202.885	147.292	162.142	175.555	324.33	701.649	380.235	289.826	133.139	181.65	231.449	183.917	192.112	1544.4	449.777	204.774	254.38	405.183	475.847	428.606	876.379	1272.05	867.057	935.738	877.084	704.907	497.112	1076.69	398.352	1671.3	1066.14	110.407	2059.84	572.784	198.077	388.695	328.238	476.716	1018.25	2601.39	804.19	356.682	319.512	450.645	407.912	504.255	106.432
201292_at	51.0127	33.0645	33.4298	30.1929	28.6276	35.5311	114.021	39.2933	56.452	21.9415	17.7915	35.1552	70.5669	36.4828	33.3471	457.937	43.9249	117.196	49.3618	17.3482	129.993	178.388	67.3074	306.923	179.312	219.255	188.933	393.211	271.061	512.847	58.7474	1158.21	53.4956	34.4793	666.537	72.6316	35.9708	39.4122	59.7537	57.3441	164.275	708.71	45.7708	39.5533	53.283	14.7178	36.2731	191.779	160.698
201293_x_at	3016.72	2617.86	3087.98	1833.85	2067.85	2092.05	4778.95	4409.47	4751.3	1757.64	1508.84	2052.13	3171.32	1742.12	2127.45	7441.81	7259.26	4963.27	3056.6	2389.83	3385.93	3501.76	4908.87	5965.21	7927.46	4595.95	3324.71	3578.76	2158.88	793.684	166.021	1191.98	389.658	244.681	762.233	891.183	147.766	89.1292	675.359	2079.99	740.335	1297.59	1484.85	88.378	439.711	766.011	1221.74	884.077	2804.9
201294_s_at	68.6578	50.0292	33.0928	84.1921	64.0079	71.3061	118.813	38.5384	37.5951	31.8929	49.4283	106.757	165.718	113.757	139.399	76.5851	55.0201	132.671	147.512	29.238	60.5235	57.3369	33.7221	297.567	30.6298	91.3698	127.456	100.621	97.0463	39.9001	29.6453	32.95	35.909	27.587	78.1108	34.5505	46.4018	22.3447	40.0392	32.1041	42.9356	72.837	43.1032	25.4616	34.3453	18.6921	66.3922	59.23	217.696
201295_s_at	78.383	63.2158	63.7427	92.4781	113.347	97.0558	48.2195	39.3918	50.7657	66.298	92.0547	101.711	130.578	75.4301	118.035	33.2112	35.6842	63.2021	60.177	28.6565	37.1911	33.3643	29.2976	192.749	38.751	55.6427	73.6177	93.36	88.8578	29.9125	32.2014	25.4089	40.0757	20.4518	60.8596	50.9205	36.9724	37.6816	57.6753	36.1434	40.8692	39.3073	39.1538	27.6603	38.2112	30.6616	95.4249	91.2581	101.601
201296_s_at	302.627	315.907	264.373	285.227	312.835	501.092	857.541	719.457	905.387	440.822	377.612	520.858	688.95	457.715	618.083	358.779	253.7	736.104	698.113	256.5	235.816	272.402	79.1118	703.526	422.499	666.677	349.203	343.913	457.801	284.818	33.0979	338.072	31.8616	31.5117	282.951	43.6424	70.8797	22.7063	34.9145	67.7925	95.8865	262.203	297.931	30.6581	103.114	43.8124	193.121	223.192	930.397
201297_s_at	304.991	317.528	227.985	437.007	460.516	485.535	140.476	339.814	197.023	127.36	224.248	347.238	530.593	237.186	515.147	180.271	92.9686	476.048	292.632	124.767	242.169	262.853	393.27	946.388	384.76	303.275	815.827	566.468	814.382	347.677	79.3935	239.734	89.9447	236.997	276.499	196.363	183.626	76.6446	307.198	123.758	77.5331	124.661	137.585	184.612	463.445	191.476	401.191	233.925	644.542
201298_s_at	492.3	315.411	404.79	630.491	556.091	587.67	330.788	127.521	307.321	98.0244	395.864	502.142	585.466	455.046	602.841	265.126	90.4564	494.676	228.926	178.764	287.455	415.093	507.192	1173.95	519.096	514.396	747.651	507.444	606.666	201.484	74.9827	225.688	78.3517	106.241	240.574	125.337	176.011	84.2752	206.2	98.5724	60.1144	123.194	75.6603	41.8377	234.125	416.165	264.939	161.607	171.485
201299_s_at	397.613	354.701	312.565	533.506	398.163	748.853	238.13	208.412	223.371	155.07	455.649	537.938	581.056	431.739	732.588	303.982	211.809	1061.55	411.199	121.87	236.933	382.413	113.593	1323.58	379.209	407.493	1244.87	701.266	1363.29	240.508	45.4958	88.1584	32.2874	115.978	258.841	43.25	114.832	51.6008	211.225	38.069	69.8443	174.012	1142.54	129.983	390.841	58.5655	358.423	311.972	900.668
201300_s_at	201.327	91.7177	72.4182	101.566	93.3841	178.521	105.045	31.5035	43.3138	55.3657	85.7161	135.362	272.198	74.7534	192.491	57.6254	18.3772	60.9257	31.4434	33.8963	67.0305	66.8419	65.1278	154.389	103.855	167.054	124.805	100.686	173.717	28.1015	28.2323	60.9456	19.5785	18.8513	34.3432	44.7898	26.3863	10.9529	27.4272	15.8174	21.923	201.122	29.0021	20.9459	22.8325	13.4072	15.4679	23.0359	243.755
201301_s_at	115.433	112.518	93.3146	117.331	98.7028	107.868	68.71	51.977	66.3221	44.3755	45.7173	74.8134	117.332	52.6738	110.873	38.7447	47.062	86.3323	57.3057	71.5546	70.5048	69.6188	38.4664	157.112	50.4111	86.7385	83.2045	116.636	65.4511	27.1029	54.4016	26.0271	50.2959	23.6407	33.4667	31.418	30.1709	40.6317	24.0297	72.4883	30.8206	33.8341	63.3472	31.774	54.3316	44.7146	30.8052	26.0657	67.975
201302_at	330.213	286.352	223.759	313.475	186.674	341.28	448.467	397.577	391.39	45.7863	166.444	253.16	427.875	154.914	372.308	169.787	96.9368	455.505	319.729	207.678	115.558	234.367	32.9357	628.557	163.187	353.527	194.802	233.732	100.83	21.9956	14.0399	15.2972	14.7375	6.2016	8.17893	13.6892	11.623	9.04726	7.86763	42.1679	11.1662	6.92404	17.3471	15.492	10.8163	13.7401	131.465	115.248	409.672
201303_at	332.107	380.29	116.169	121.915	179.676	341.048	465.217	404.707	593.464	291.164	220.928	347.697	504.738	280.4	467.422	570.542	175.185	809.175	316.712	349.059	330.318	343.454	239.733	663.122	558.991	571.536	462.165	512.335	707.209	121.825	46.5146	351.348	24.6144	24.4835	297.295	52.8216	36.7224	9.79689	75.4445	115.593	101.59	367.889	374.192	27.3326	50.5926	13.0151	133.722	115.997	1210.3
201304_at	614.771	570.031	577.26	655.977	610.929	1111.92	922.995	936.17	1056	739.895	425.407	562.734	790.252	411.769	724.416	901.85	1156.04	811.216	1029.77	746.366	752.754	1037.05	83.4012	952.677	1023.61	679.344	1131.36	903.632	1338.02	1079.03	712.815	763.292	808.47	1054.07	584.348	1947.6	947.381	1423.34	969.544	1626.59	516.102	599.512	1635.39	1103.16	1226.81	1601.69	578.943	770.728	420.563
201305_x_at	2435.41	1952.84	3554.26	1423.48	1443.99	1691.92	3720.06	2912.23	4144.9	2876.94	1553.54	1494.44	2135.57	946.916	1587.68	4442.99	3728.59	3479.66	2194.35	3997.12	3447.65	4453.12	764.74	4084.7	4681	3434.45	3939.22	3969.74	3941.18	4241.8	3186.31	3867.73	3099.24	4834.58	3089.55	4240.43	4141.73	7065.12	4017.5	5404.14	3929.53	3700.96	4361.1	4761.58	3861.43	4549.53	2723.14	2710.99	2950.05
201306_s_at	1007.24	759.41	855.05	569.693	675.67	840.074	2067.95	1792.59	2947.57	1315.76	639.075	767.758	1116.53	449.411	1083.51	3164.36	2285.32	1983.03	1283.66	2698.92	1864.08	2596.45	198.149	2485.64	3071.77	2109.11	2115.6	1957.03	2744.3	2303.29	2286.06	2261.44	2004.94	3060.65	1791.71	2741.57	2438.72	5468.34	2284.91	4078.41	2328.35	2331.78	3228.69	3489.47	2072	3612.77	1167.67	1228.82	2113.18
201307_at	123.79	147.036	57.0954	80.4556	132.02	110.444	300.197	187.687	291.104	32.0075	66.7999	157.239	344.664	138.045	192.332	852.697	237.75	916.859	543.258	352.245	396.879	552.241	98.6011	803.052	409.205	558.27	665.442	497.426	642.563	68.0339	58.8611	58.8895	29.0509	25.053	83.3771	52.0812	37.1819	22.9636	33.3701	138.561	60.334	74.0617	37.6598	35.0772	46.4066	16.914	55.9042	20.7195	265.171
201308_s_at	62.0767	79.2607	44.746	98.5501	86.6575	71.9681	111.389	118.567	73.1825	97.7251	180.855	116.025	93.5877	116.287	92.0701	121.04	132.079	108.838	76.1168	91.5989	113.428	116.366	175.969	133.814	145.68	139.138	211.666	139.814	131.623	61.5498	95.6762	81.8836	96.6869	51.7893	60.0952	81.713	54.38	137.732	66.0734	134.15	75.3082	78.8391	53.8712	92.1597	52.6847	121.909	49.9085	66.9657	70.022
201309_x_at	73.5063	150.502	59.6768	86.5278	87.0949	83.2018	152.152	40.6631	73.2021	37.5887	50.4184	85.3887	174.559	73.4621	82.2254	124.24	58.8136	227.419	92.1334	120.709	107.52	86.5937	70.8661	91.2567	75.1115	107.399	134.766	196.349	103.378	17.4554	18.7678	14.154	19.1318	10.9298	32.5448	25.1605	16.5995	40.8212	35.159	79.1172	23.7621	17.3533	14.4318	30.9269	14.3401	21.6801	28.8995	15.8613	167.721
201310_s_at	1648.55	1574.7	934.199	591.295	748.9	793.866	2547.76	2527.24	4192.57	67.4366	850.194	1136.71	2154.62	899.804	1012.9	4147.17	4024.82	4446.47	2239.09	1505.61	1543.73	1456.4	1182.21	2992.35	3154.54	1685.19	1334.22	1616.81	894.924	37.9473	41.4151	43.8242	23.9629	19.3555	120.099	45.086	31.3938	11.2614	92.7184	480.902	71.9441	53.6913	39.8511	24.0239	53.5159	48.5851	339.745	84.3421	1436.74
201311_s_at	171.904	157.336	171.322	166.634	184.212	285.976	193.854	145.193	133.994	50.7779	118.014	235.698	333.47	170.514	459.913	281.241	123.66	327.294	237.336	411.199	615.859	562.8	98.04	541.782	301.799	478.198	896.12	763.015	508.458	1506.1	822.516	863.507	982.224	1709.1	326.984	2611.26	1158.75	1426.61	1486.49	1199.64	350.149	328.395	1785.87	1164.44	1081.46	924.669	431.252	321.027	209.118
201312_s_at	501.521	427.268	421.103	473.163	747.614	607.731	834.673	772.374	1093.42	339.644	354.782	495.842	631.273	293.711	918.914	1085.23	782.983	587.796	904.032	1315.11	969.561	1177.81	513.411	766.34	1147.78	862.608	1070.61	1268.35	1099.98	1192.23	884.336	976.723	1363.76	1462.31	444.519	2314.1	1191.57	1978.33	1300.95	2737.31	631.062	457.839	2037.12	1350.69	1161.55	1796.6	570.64	561	548.83
201313_at	32.6089	26.8595	60.2986	47.4373	47.4468	67.8066	144.098	420.051	216.434	299.74	51.3422	70.6882	196.239	37.3868	66.284	683.551	96.2614	399.442	424.291	478.678	307.918	322.479	102.688	731.926	256.558	824.437	605.724	287.505	349.776	404.291	90.0465	533.14	96.285	171.406	373.568	110.645	93.8231	32.7944	178.045	147.15	149.713	358.995	2163.76	83.2861	322.991	211.529	123.903	416.816	93.367
201314_at	29.8016	25.939	22.9188	28.5348	29.9256	39.5571	21.5448	26.275	12.1485	20.5127	19.1534	27.357	37.1682	25.0595	31.3968	29.6456	16.9686	30.3231	24.7856	18.0229	48.1442	44.2619	24.0677	38.6123	33.2014	41.0864	37.0422	46.4357	50.665	37.6494	29.1162	31.4124	22.4678	29.9967	30.7589	28.5766	27.2137	20.9107	25.7936	16.1186	12.4655	58.4997	25.745	22.947	25.2257	21.0193	21.4025	41.5828	34.7418
201315_x_at	303.178	359.739	299.47	244.22	375.751	562.801	493.043	421.921	209.651	273.864	371.227	450.127	373.791	566.07	522.639	294.215	316.626	300.411	156.083	85.1423	364.892	619.862	431.998	305.588	733.485	593.371	185.03	134.973	346.357	24.4535	20.4386	19.6638	39.1326	19.9896	25.8959	29.5366	26.2953	18.698	29.5327	28.3966	23.1726	165.54	79.3688	19.9432	54.8968	16.644	104.091	177.644	231.166
201316_at	62.7006	142.716	27.0791	93.346	111.191	89.2876	57.0692	87.1184	28.4174	16.6414	16.4442	60.9931	172.422	61.5267	79.3331	124.713	26.6966	129.811	71.1535	73.2005	94.132	117.484	43.1495	217.434	111.894	174.427	141.983	178.2	87.8412	54.3303	17.0468	52.2655	14.7447	15.4644	39.7706	31.0736	26.8975	11.5014	22.5712	59.7808	24.3597	72.2189	15.6708	21.0458	23.0807	10.369	18.4883	45.8262	26.398
201317_s_at	669.873	658.773	453.132	470.354	533.882	587.813	1050.99	953.284	1027.15	656.776	439.55	530.403	685.318	419.575	626.203	1159.11	578.42	1164.04	741.009	613.963	458.833	773.418	697.794	1373.45	1146.18	713.814	983.837	872.277	1304.99	343.167	65.2668	561.094	228.402	188.269	382.183	134.743	147.148	113.763	227.709	360.732	230.064	435.131	317.649	258.942	235.605	201.565	400.167	203.551	861.637
201318_s_at	1527.17	1151.49	2097.86	1360.71	1540.48	1769.76	1339.76	1253.7	1453.62	1512.8	1418.3	1520.78	1923.64	1179.82	1661.72	1351.09	1296.29	1224.73	1380.58	1553.5	1352.76	1602.22	479.57	2366.17	2643.21	1892.27	2593.09	1953.94	2384.77	1232.41	537.077	1008	945.361	1191.07	683.994	1778.25	800.294	1675.85	1162.09	1635.89	637.807	680.271	1776.65	1361.14	1019.77	1273.39	1232.72	559.896	1815.58
201319_at	274.262	251.992	182.783	328.344	438.695	439.948	181.293	159.559	106.227	217.655	208.354	366.425	492.118	284.032	619.018	170.315	85.6131	291.787	272.823	195.082	215.932	239.368	125.652	559.975	294.237	374.405	534.632	513.695	653.839	379.885	197.076	309.608	197.364	310.809	163.338	454.366	364.916	116.746	361.631	165.905	92.5452	128.788	444.798	244.156	296.371	283.943	331.978	176.861	707.835
201320_at	90.4561	111.467	55.4221	67.9551	59.8149	76.4468	68.1958	34.2376	46.0605	42.115	35.9184	52.2686	62.8094	53.1273	62.2738	49.9534	23.4119	160.448	50.3665	41.2182	82.5687	56.4953	30.6493	138.984	44.4259	67.3088	180.588	116.684	86.2922	81.7652	23.6686	79.1334	25.734	61.082	114.641	33.8294	44.0878	33.1624	54.0793	13.7419	37.0098	45.1692	30.5785	20.8517	47.8698	14.6763	27.2669	44.1432	77.2352
201321_s_at	45.0004	39.8265	59.2647	42.229	29.4741	37.5259	37.6385	31.0841	46.9931	30.1582	32.0075	31.954	43.402	23.6215	31.7711	40.244	27.2856	29.3949	29.3292	44.2327	33.3768	36.4569	31.9517	34.552	55.9941	52.0623	36.8333	35.2476	28.0235	26.8721	29.2085	37.4245	24.23	29.2198	26.6739	23.6949	24.4788	40.1408	18.7352	33.5856	47.5161	37.2898	23.8428	26.4579	23.5095	25.4432	26.7113	20.9731	34.353
201322_at	485.834	535.737	364.132	381.539	386.022	696.738	1088.81	1064.07	1440.27	626.031	605.686	606.37	806.995	357.417	773.851	1512.68	921.653	873.095	706.556	1184.62	1260.57	1322.22	188.918	882.999	1454.93	1061.77	1304.17	1318.05	1647.46	1139.26	774.864	948.46	908.704	1070.55	414.265	1377.37	818.739	1533.77	885.209	1867.08	437.232	666.054	958.989	1112.08	796.921	838.856	526.563	365.921	705.888
201323_at	368.793	328.475	494.902	252.752	285.8	242.194	375.509	364.613	605.637	211.13	220.215	186.33	269.457	149.354	136.012	484.37	369.308	281.076	326.01	492.78	237.082	448.481	554.31	392.897	575.747	522.951	425.322	531.172	515.102	126.183	45.9923	264.288	84.6794	23.2221	150.671	90.6697	48.4375	80.4755	45.9987	196.396	81.885	433.298	314.785	67.4763	70.6613	114.836	60.8328	240.378	206.479
201324_at	76.4708	91.7041	42.0695	71.3799	58.6887	47.0408	100.715	82.9352	100.425	33.158	14.5335	26.8788	70.5201	19.5688	26.0253	25.7716	11.0103	283.76	388.937	51.4861	30.2266	15.1773	15.6217	10.7245	30.9717	112.216	9.36651	11.4234	13.9865	9.29295	9.32966	9.90868	8.4099	7.12803	8.26496	14.4606	11.1059	16.5549	9.39409	87.2672	12.6156	9.47925	9.75976	10.7902	7.96977	12.6233	19.0787	8.05218	112.47
201325_s_at	68.398	131.048	71.0107	122.427	124.361	93.0964	66.767	117.764	67.4349	86.2587	92.6835	92.7153	68.2775	138.724	84.1729	65.6243	47.8236	124.652	189.77	75.6058	59.9927	62.6101	74.0267	34.3704	68.5595	99.2379	43.8279	57.9582	59.2021	45.79	60.5874	51.1445	49.2453	48.3222	36.196	56.0968	53.8352	67.5627	62.8606	69.1768	83.646	59.4375	44.4432	56.1873	36.5729	55.6102	61.4166	40.8347	243.473
201326_at	256.123	204.97	113.312	160.15	209.015	261.19	254.108	168.458	249.215	40.6866	140.724	208.357	312.72	164.092	260.988	536.654	259.176	407.076	402.167	332.907	254.257	344.038	581.612	529.439	447.089	362.031	506.595	373.326	654.66	151.081	22.2592	234.336	30.1614	49.0981	160.011	55.9341	63.5967	31.1413	54.823	155.642	73.1468	242.386	42.2903	121.567	98.7112	18.4383	96.2544	102.847	833.764
201327_s_at	552.345	413.811	311.139	340.662	473.806	376.953	1395.25	1186.33	1377.45	483.244	434.057	454.017	705.692	290.79	477.032	1217.06	1033.85	1029.33	748.406	730.359	655.8	736.894	1243.23	1014.66	1391.05	1043.12	797.753	825.013	1117.59	275.705	37.4826	379.932	46.5169	39.1418	325.065	88.9395	82.837	51.5769	80.239	312.622	155.641	504.157	182.713	41.0933	201.422	30.3624	199.742	190.552	573.884
201328_at	478.055	796.129	191.895	256.9	440.172	181.871	1100.4	1184.49	1272.95	95.0593	337.656	513.161	514.111	664.314	601.326	2810.46	1918.37	1839.2	1093.08	1114.13	901.876	979.477	422.697	1325.1	1428.41	1135.31	832.5	637.937	705.903	21.9264	21.2987	33.3258	24.7195	13.6736	48.2444	26.9467	21.918	12.3202	58.569	324.81	41.5019	13.9558	37.3544	20.0607	34.2407	11.5765	195.802	146.581	357.424
201329_s_at	43.5189	36.6879	61.5206	29.5319	32.5229	25.1416	32.2585	55.1552	41.0093	29.4952	15.8591	26.625	33.5353	26.9588	35.0494	45.4637	28.8921	47.5787	41.259	33.3721	49.4072	38.3665	29.6969	53.8098	22.1103	39.3772	78.8419	52.9083	50.1342	28.4318	24.4795	27.2023	22.6343	19.8385	28.7695	18.2222	22.7441	19.0551	19.5273	35.4493	18.317	19.1434	36.8645	22.1174	27.4157	18.8973	28.6924	32.1832	100.667
201330_at	93.8567	101.759	58.1526	73.8389	103.293	132.689	141.316	74.3175	87.0849	80.2822	40.1396	82.3554	101.725	75.7023	148.819	163.05	63.1841	189.179	144.106	123.93	166.836	128.662	101.032	184.352	105.244	232.739	213.697	185.532	210.267	112.531	68.7326	75.0609	61.0888	50.3038	87.4601	42.7911	86.4002	24.7072	67.8667	69.4619	34.3874	87.9019	87.598	60.8052	68.5382	78.9379	39.132	61.4069	148.193
201331_s_at	430.545	314.323	326.525	512.562	319.856	534.656	115.132	45.0506	69.2054	50.5994	239.715	248.622	242.066	192.616	341.852	104.72	39.2958	149.714	102.125	160.086	166.272	127.427	26.7961	100.268	180.137	281.849	216.09	160.614	163.374	150.253	224.414	193.751	103.113	178.273	75.4574	191.671	518.148	72.7566	248.56	161.278	57.5089	159.098	40.5681	121.05	142.247	29.5494	65.6869	103.819	230.569
201332_s_at	29.2232	36.5406	56.574	33.0736	38.5849	44.1152	35.2843	27.5091	66.27	17.7971	28.3986	32.6924	40.245	26.9666	37.0639	25.684	24.7879	42.7173	30.4406	37.3954	32.5207	42.4712	33.9437	28.8746	35.2486	42.7445	33.3989	38.897	38.4033	36.6509	40.568	38.0568	31.8141	35.7201	38.029	37.8991	37.2848	29.5897	42.6464	34.6155	37.1937	32.3643	44.7806	41.9567	32.8329	31.1491	32.205	33.5325	28.6919
201333_s_at	28.151	26.8974	26.8025	31.4639	30.1247	33.6815	24.3786	30.6078	24.877	28.8143	31.9472	28.4616	25.7265	25.9826	30.7285	25.5946	24.6345	28.7727	31.7389	54.7861	53.8585	44.8859	31.9151	61.4723	31.5479	28.2475	66.3815	46.7874	37.3864	743.303	486.865	681.931	451.333	2081.55	177.318	401.497	973.689	551.373	1396.48	517.114	265.303	99.2975	122.638	914.654	1107.05	556.066	105.893	389.781	25.7521
201334_s_at	71.1366	146.482	125.747	156.264	196.596	295.921	115.478	67.0918	179.462	35.8905	101.414	175.957	423.451	93.8876	237.746	371.965	94.7645	297.538	241.836	280.475	483.786	764.84	148.291	3094.7	1322.26	839.547	2090.48	1092.27	2475.72	8541.75	8030.23	7075.57	7599.44	9347.82	4149.55	10875.3	7545.78	10812.7	8774.96	9159.64	4476	3037.74	7183.93	7962.01	8353.73	7131.27	3643.66	3877.57	83.8597
201335_s_at	50.493	98.8723	101.284	143.311	148.036	161.607	75.019	53.481	69.8391	56.9213	45.0417	77.8889	77.6106	72.5834	145.054	92.4624	40.3436	73.0827	87.8705	133.711	188.66	280.035	135.728	807.399	131.891	120.757	545.104	224.877	317.336	5866.24	3756.77	4135.58	5790.51	9182.61	2394.89	10863.3	5528.31	9197.64	8668.29	9999.73	3553.11	967.813	2627.62	6970.83	7081.17	2801.43	2306.64	1360.85	49.8811
201336_at	200.209	309.073	295.901	237.856	272.063	263.086	661.592	726.038	488.915	348.02	270.035	304.58	279.057	241.319	473.263	399.306	262.195	382.773	253.437	501.808	321.635	433.832	350.21	847.894	735.725	1063.92	630.413	524.996	270.75	137.596	94.3629	186.368	129.546	46.9361	190.743	178.698	95.6369	140.084	77.5438	214.81	169.414	501.874	133.005	81.6349	57.0896	86.4202	99.6757	272.251	144.655
201337_s_at	78.9518	84.3016	83.0288	80.1388	86.9798	92.1468	93.424	63.3277	48.0866	81.205	33.7858	60.5506	75.703	56.2716	93.3979	89.7067	61.034	87.5751	80.7026	65.8152	91.3451	83.2731	78.7941	181.828	116.254	106.4	158.971	131.071	130.91	113.232	94.5962	76.5029	53.7111	67.8899	72.8533	117.459	80.5495	50.5953	73.902	57.7076	53.2161	228.929	42.5294	72.7991	75.003	56.6026	44.5345	66.0543	51.2574
201338_x_at	232.366	168.959	185.648	244.093	297.417	531.735	300.363	245.27	380.536	243.723	187.476	246.908	472.12	127.721	328.758	403.001	134.666	516.857	181.509	256.202	371.215	405.009	91.4776	296.283	404.312	421.734	379	426.271	348.095	172.402	46.9291	352.029	71.0741	83.3962	96.6383	57.3179	56.4848	40.0121	116.251	114.747	35.889	362.889	355.394	60.0876	72.7502	14.6679	76.4676	144.915	283.657
201339_s_at	167.886	170.633	104.483	246.124	167.533	330.529	244.633	217.817	207.995	97.4409	157.064	244.662	365.509	198.298	314.756	212.725	68.2449	403.94	122.157	156.499	182.327	228.711	149.686	929.515	281.923	392.707	598.297	587.229	240.283	93.0851	62.6077	95.0702	43.1334	73.5937	37.8119	73.6814	40.4695	39.3263	43.0732	63.933	53.9123	93.6425	52.3116	72.0523	151.099	81.7266	123.705	67.4452	761.745
201340_s_at	43.2935	34.2928	85.6187	35.9326	31.4005	32.8512	31.6777	31.8502	67.6542	28.6805	40.8622	32.8662	33.5556	30.0467	28.3213	31.2565	32.8769	29.9405	27.7013	29.412	33.5686	29.6475	27.2366	36.3933	38.5483	30.1881	25.4539	27.6747	26.1652	27.5661	25.2304	20.7866	23.9942	22.7017	24.9786	28.8015	25.6442	39.222	25.066	32.1669	47.7419	27.1192	22.868	24.9509	27.9361	31.7901	27.0603	28.5207	29.655
201341_at	35.1262	46.9777	24.6653	66.7691	55.006	104.565	41.5689	36.3794	20.4305	23.9439	29.4505	67.5206	113.503	48.9929	126.915	29.5681	22.4429	28.474	21.4678	27.0434	28.6474	37.963	42.1704	63.382	132.063	90.6347	46.5933	47.4488	43.8758	30.2246	25.6909	22.2178	28.3982	24.9116	22.3927	33.8619	28.4988	23.3586	33.4335	19.0751	49.3353	24.3728	37.4383	24.9415	38.3935	25.3534	73.0195	53.4257	95.5122
201342_at	68.9233	67.8389	37.6838	52.0181	59.2858	112.485	95.6156	53.1235	39.6943	34.7865	15.6083	39.793	90.949	26.5852	66.4411	135.282	29.562	102.962	89.551	53.9131	98.3214	78.9512	40.0233	137.001	67.3843	113.14	104.814	108.215	94.9404	23.1405	24.5614	33.0221	14.8302	21.3778	47.7492	25.1829	23.9495	13.2836	21.7223	24.3291	21.8253	83.1351	43.2603	20.3449	25.7455	14.7247	27.8839	56.4917	120.54
201343_at	363.952	211.723	202.164	222.864	300.303	714.615	255.85	161.675	194.664	90.989	275.981	310.42	494.6	184.766	368.165	348.754	126.509	301.835	120.577	173.74	214.209	245.197	248.315	401.499	338.886	292.298	255.777	243.673	379.001	153.886	42.5986	251.076	83.516	103.388	137.932	63.7878	56.0553	44.8559	95.403	146.126	104.485	213.487	126.69	89.6712	135.267	53.4851	101.125	51.378	246.549
201344_at	59.8278	75.3477	60.0143	61.7051	75.8646	117.324	23.9973	33.1337	13.3959	22.4249	29.9022	46.8794	102.489	32.0301	49.203	53.8019	23.3471	47.5847	17.4165	55.8628	80.9551	51.7291	39.6314	74.4152	59.7863	43.3133	52.4849	66.441	44.0748	20.7195	32.0173	21.4292	22.7165	27.1095	28.2095	17.4194	14.7403	15.7088	24.2671	32.2207	19.6293	34.3191	14.0161	23.1364	44.1143	18.8136	19.2072	16.72	45.947
201345_s_at	270.92	213.903	169.858	284.32	258.284	530.449	164.314	89.4962	123.172	215.938	176.088	262.755	297.21	238.35	382.115	256.177	100.535	246.158	277.885	205.548	322.302	272.26	78.4384	340.667	346.557	384.162	367.872	318.234	325.337	303.541	194.507	456.171	157.209	258.517	237.956	204.538	286.888	112.125	224.501	204.849	92.4393	457.428	243.912	369.732	243.242	553.116	112.698	145.042	300.083
201346_at	185.269	211.067	160.091	178.421	291.665	310.485	254.596	159.701	137.984	61.3663	119.275	221.913	330.458	149.4	411.825	305.728	113.796	381.164	307.463	210.833	218.336	273.382	155.049	595.203	351.595	489.564	379.075	413.696	714.965	449.045	89.0183	747.349	123.877	192.891	429.589	124.043	292.406	115.324	269.611	185.141	268.193	574.812	851.569	183.095	259.355	262.987	252.555	273.703	611.738
201347_x_at	99.5091	69.4591	60.6258	65.7398	76.443	133.497	107.268	87.4578	39.736	25.3929	33.8686	59.4637	104.166	41.2725	85.8668	166.689	48.8395	144.841	80.2013	97.1539	209.63	232.419	58.8672	166.287	116.735	190.095	168.968	108.878	130.338	48.6274	54.3352	82.1085	30.8439	26.1051	53.912	34.2651	48.1031	22.3256	58.2943	54.4242	20.0652	183.796	38.7782	34.2022	30.047	29.524	25.122	36.5875	47.6536
201348_at	30.8698	32.4408	25.9125	36.159	33.2533	35.328	31.9287	39.3367	15.0328	33.7418	28.9595	32.7177	29.3705	38.0045	35.448	30.9462	31.1475	27.9669	26.9925	29.149	29.0181	33.4081	33.5766	34.8567	25.1927	36.7616	32.4723	38.1648	33.9866	33.5479	28.6672	32.2581	33.2063	30.408	30.5609	42.632	37.1302	26.7956	33.8983	24.8145	23.9217	43.3618	40.1424	33.1422	32.1338	34.7864	37.1785	31.6466	35.8664
201349_at	166.057	67.3966	71.2315	84.624	160.718	136.225	143.942	76.255	123.726	81.6337	78.3404	170.212	270.082	100.059	396.483	135.554	32.5463	257.215	166.379	115.117	132.398	117.856	87.1069	294.018	193.171	355.707	258.777	240.776	194.829	54.7171	48.7568	79.6642	39.753	74.3849	55.4092	56.148	59.447	22.1651	50.8842	65.9061	36.7965	66.0322	117.901	93.1207	88.5701	38.1057	120.185	68.9403	274.578
201350_at	101.361	79.8075	52.2587	99.4797	106.583	97.2902	33.1626	25.205	30.1176	21.9119	19.0538	47.631	98.8005	31.1563	87.7554	35.7193	15.0268	29.9418	36.3207	84.074	73.8404	83.77	188.932	131.286	63.2727	176.808	145.953	183.048	116.028	317.007	98.0169	313.517	116.397	359.491	117.852	279.57	404.143	105.952	234.973	141.316	55.3876	123.476	169.14	330.343	179.368	172.13	81.1855	65.7485	237.506
201351_s_at	161.601	123.57	79.376	159.544	188.009	218.634	119.329	87.5735	111.96	90.7354	63.5366	138.782	273.897	94.5899	225.357	181.232	58.3819	255.204	83.1194	158.089	188.188	221.325	110.986	408.461	250.665	266.288	519.83	453.729	342.429	518.434	100.651	248.242	76.3518	377.57	201.293	304.129	599.693	123.078	349.623	191.012	83.7122	266.063	359.902	160.375	390.592	138.425	124.759	267.594	232.541
201352_at	586.212	508.339	469.934	394.96	510.115	635.706	822.741	1028.66	1296.75	1092.51	478.903	571.395	901.631	305.207	808.863	899.141	688.573	739.326	843.256	970.702	700.846	688.48	118.587	803.351	910.553	894.002	767.329	864.186	987.737	439.738	357.584	405.598	302.074	482.444	308.059	745.96	512.641	393.422	408.084	1111.42	369.731	359.567	1038.68	382.506	344.918	896.628	95.2354	289.615	1065.49
201353_s_at	29.97	29.5867	31.0066	34.929	39.3082	36.8163	29.0341	33.1507	23.0015	30.0904	23.3364	29.096	35.981	26.8182	31.8273	25.7039	24.2923	26.7538	23.11	33.2171	30.8243	40.5861	23.6021	30.405	27.4763	29.4205	29.6432	30.0248	26.6845	33.4661	31.579	64.9685	34.2059	46.1444	39.6254	32.5055	37.3527	32.6611	30.1372	29.9425	29.8403	31.053	60.4322	34.9249	43.6002	31.3557	30.0923	27.8336	25.6532
201354_s_at	164.93	264.563	164.394	283.066	315.441	509.473	252.721	88.3677	151.086	89.8189	178.834	292.672	486.939	236.007	357.006	149.361	67.0697	470.372	239.004	207.787	201.494	201.969	123.816	415.057	226.322	245.408	443.121	296.667	480.502	522.698	202.348	536.167	156.021	347.421	452.948	180.586	483.86	282.236	438.925	171.253	236.81	182.634	210.662	257.875	452.867	295.901	366.398	296.726	401.25
201355_s_at	252.605	145.285	178.253	130.741	216.973	200.3	181.86	249.364	124.077	126.76	121.118	164.271	205.929	129.31	225.78	128.163	92.9986	200.302	140.787	191.739	166.719	165.792	76.4484	190.026	153.394	173.631	178.214	193.003	160.355	181.406	222.861	157.475	157.781	111.375	178.874	113.407	216.121	120.464	174.583	95.7054	104.197	133.337	163.728	154.103	197.944	141.521	185.904	124.634	152.089
201356_at	274.496	179.292	136.318	211.253	329.907	425.85	533.898	247.116	488.498	292.071	133.834	245.481	384.586	165.348	426.689	470.147	222.851	488.402	315.703	372.787	401.578	461.487	375.755	609.633	718.255	581.447	658.963	612.489	1265.43	513.219	263.713	909.252	500.741	559.837	489.362	983.287	585.24	468.306	742.505	488.967	284.123	624.689	472.314	642.3	546.579	1622.71	317.877	273.216	180.318
201357_s_at	66.7263	51.041	85.7648	49.8655	81.0939	54.8473	52.4261	59.4859	84.9979	69.545	113.219	57.6389	49.6088	44.2747	44.3846	80.471	125.783	60.3003	46.2517	83.6341	115.504	127.578	46.4491	43.6397	219.771	78.5928	47.5706	45.4763	53.4491	48.906	68.4345	74.0089	59.1842	42.4863	51.7223	70.6706	57.1991	167.445	57.1093	119.988	78.5357	139.618	36.9189	60.3043	38.6742	55.2489	37.409	39.1917	40.8334
201358_s_at	947.942	425.703	389.809	366.493	593.633	574.629	883.259	1108.59	1153.92	486.598	389.024	490.549	908.82	313.643	522.203	917.64	678.686	678.631	614.521	564.214	442.268	586.83	498.929	871.462	1184.36	850.877	575.886	522.869	690.255	128.772	51.2715	425.816	48.8707	71.4533	283.217	78.1303	115.025	83.5303	67.0397	209.138	113.469	380.776	71.3059	52.107	153.956	191.196	79.0391	165.389	914.206
201359_at	125.932	102.23	65.8354	87.1598	96.325	207.395	134.954	148.348	77.2572	58.6377	36.1941	100.813	271.173	85.6064	122.935	209.458	52.8434	172.06	84.8524	85.6578	153.914	190.004	74.7685	329.771	170.415	257.328	289.411	218.522	160.395	79.3249	40.7933	97.8002	33.906	51.1777	119.382	41.2916	53.6282	19.3306	23.7839	50.4877	44.374	190.317	39.9547	40.5395	86.0298	20.0051	20.6949	59.022	236.952
201360_at	76.4639	78.7368	43.1935	59.2905	60.7803	75.1371	46.5572	82.981	20.3117	23.5456	16.9793	55.9929	92.4937	66.3912	94.274	40.4585	20.0303	43.2902	19.5983	24.531	39.3253	60.3602	30.3077	37.084	59.6813	276.464	41.9764	41.1344	60.2074	33.075	39.0757	31.8219	24.7618	32.8101	32.9245	24.1713	35.3146	20.4512	31.6824	24.8333	20.209	42.325	43.0328	33.0786	32.7128	26.4173	35.1305	41.4281	265.569
201361_at	98.8929	88.2372	65.9966	78.8392	87.3767	78.4756	47.4814	42.4681	32.7357	30.2718	39.0978	64.8032	109.948	45.8093	89.5557	45.6987	34.296	59.6423	42.9708	51.8509	52.8885	62.8145	62.154	81.9699	54.996	65.3971	125.963	86.4836	98.2397	50.4887	35.9783	41.3578	34.163	39.1936	41.1013	43.3011	39.5118	34.3055	38.9713	33.1679	23.9705	48.3869	39.8719	46.044	46.7146	29.6328	25.8065	45.9674	61.0779
201362_at	708.565	819.316	803.941	736.686	1008.73	887.662	1111.95	1404.52	1387.05	681.905	842.526	933.256	1098.39	683.968	1198.47	1683.38	1293.41	1391.81	1394.75	985.727	968.718	1109.94	101.846	1829.29	1889.27	1311.93	1042.01	996.153	1128.95	613.766	219.993	918.116	385.447	233.171	603.018	141.638	431.127	482.44	667.096	846.063	506.138	442.332	399.194	524.115	465.147	573.852	823.232	431.383	1537.8
201363_s_at	227.839	256.067	213.123	264.13	524.521	497.172	246.614	191.503	182.65	113.527	239.438	421.809	527.926	335.339	746.81	473.851	225.793	610.928	385.486	311.238	375.61	438.958	198.187	1031.41	746.832	564.257	829.284	735.571	613.195	471.449	144.076	595.652	275.87	272.22	455.845	147.339	322.132	218.285	654.793	220.913	262.508	314.888	156.845	523.966	504.35	173.131	439.849	225.206	370.199
201364_s_at	36.7283	42.0943	31.1012	41.1895	42.7702	42.4965	20.2794	20.0487	8.36442	17.0574	12.8221	22.8869	24.2061	20.6759	42.7563	23.5157	15.4014	40.3341	22.2993	66.0084	66.8154	74.6369	29.18	31.423	26.2278	31.8346	64.7524	47.8803	44.4891	224.626	53.5796	242.392	113.441	638.011	40.3347	116.973	388.719	83.3153	296.237	89.7788	22.935	92.1514	96.3645	244.618	194.989	57.1943	56.4392	41.063	42.0009
201365_at	682.565	743.468	494.12	592.456	811.498	537.334	1331.18	782.988	1514.18	521.279	604.022	862.563	968.965	625.582	1511.88	1438.8	811.353	1375.63	1345.12	3201.09	1794.76	2060.99	154.253	1797.71	1460.42	1671.51	2077.9	1422.64	2371.84	6227.81	5658.06	5089.17	5010.4	7237.22	1778.34	10028.6	5649.43	10830.4	5817.63	9788.48	2472.55	1500.57	9103.93	8172	5049.08	10667.5	1712.52	1995.27	866.135
201366_at	513.23	299.807	278.642	391.117	454.248	617.009	1111.33	1747.44	1616.62	801.033	378.426	525.425	687.611	362.062	808.979	988.647	888.895	991.172	769.598	1250.04	1380.44	1882.82	1144.85	1369.31	1203.61	964.04	1882.48	1525.81	2181.25	3134.29	2592.26	1838.59	2446.01	3902.52	1318.32	4172.21	2703.21	4875.63	3544.82	4393.16	1402.44	781.7	2431.21	3685.73	3264.03	2871.35	917.974	1108.95	1224.68
201367_s_at	33.6109	35.1217	82.1571	38.6084	35.2534	29.7975	45.4824	48.9333	125.459	66.1933	88.7314	42.9233	30.6646	37.8269	32.9807	37.9541	41.9847	47.5626	39.9296	59.9926	49.9021	56.5089	52.6082	44.0032	82.4773	42.8617	37.5652	55.1657	42.6962	43.9796	55.1279	33.2553	45.826	45.1875	44.0014	45.2666	53.0567	119.802	46.9064	75.0222	54.7688	34.7958	53.4451	56.2635	48.3803	57.5769	39.7709	44.4838	43.3941
201368_at	2733.01	2418.71	2914.36	1806.71	2258.06	2183.39	3856.42	2987.87	4535.32	1215.3	2054.18	2401.3	3108.79	1990.82	2615.32	5426.48	5087.87	5637.6	3020.73	2201.67	2634.22	2500.1	1602.3	4005.54	5832.23	3187.29	2277.19	2675.12	1738.28	363.999	73.4734	894.185	359.784	118.029	527.846	179.243	192.831	117.86	253.5	1676.43	428.635	473.561	271.663	138.186	430.972	267.735	1377.06	481.393	2453.49
201369_s_at	35.7051	47.7932	44.2027	40.3753	30.5388	28.2123	37.9832	26.7947	87.0059	40.9187	58.8877	36.466	30.4955	32.2863	30.4982	36.7444	37.7626	48.0245	41.8456	60.3326	41.4793	35.6928	28.4301	47.6422	40.5484	41.2821	41.9798	35.5701	28.7528	33.3125	21.1274	33.2555	29.0901	31.4879	32.3852	33.0597	29.6869	53.7284	35.3935	84.8707	47.7091	32.2046	28.1434	34.3877	33.7724	27.6788	41.3699	35.5787	42.7073
201370_s_at	90.5181	181.872	70.8164	87.0269	154.416	258.241	154.927	73.5003	72.7676	20.4166	72.9962	133.702	264.131	92.8538	178.496	134.19	80.8637	234.155	265.504	93.4764	140.946	155.919	40.4697	274.067	145.725	133.061	268.088	238.788	265.104	241.928	88.3968	264.168	37.0103	164.32	223.634	74.7621	105.385	41.9857	140.06	82.5643	70.0516	257.554	46.4027	99.2969	170.437	18.3385	63.2456	59.0608	440.16
201371_s_at	187.048	252.701	335.946	394.906	255.068	768.573	209.057	172.52	292.234	522.613	479.564	362.828	498.158	183.603	395.102	297.494	125.092	399.157	236.886	356.381	248.061	284.961	65.2616	405.946	321.929	377.797	519.659	457.312	432.456	254.119	102.181	401.759	66.9395	285.822	177.674	90.1764	434.021	145.038	263.308	202.711	124.287	232.86	169.828	304.974	240.234	64.7446	253.409	155.884	301.803
201372_s_at	48.6543	34.527	63.0911	32.3937	31.9415	31.2516	31.0409	33.4613	101.179	57.4306	47.6159	38.0028	33.7953	38.9949	33.239	45.2205	29.2537	36.2362	30.9209	44.1358	37.9436	52.7694	34.2474	34.0527	70.6819	44.9941	32.793	32.7708	33.2814	30.6782	35.1041	35.0473	32.251	26.4665	32.2756	39.7456	33.9447	55.5361	28.5196	39.0983	42.2704	41.3659	31.2233	37.9195	31.6443	35.2228	30.1722	36.4971	33.1953
201373_at	22.4043	23.2789	24.5742	24.276	25.3687	32.3297	22.9343	18.5266	12.3006	21.026	15.9785	20.068	25.0832	18.6418	21.7074	17.5146	15.6357	25.2538	21.8716	18.1888	18.4548	16.9739	18.6686	20.3988	14.6181	20.4022	27.6519	29.2468	27.6423	20.985	21.2096	21.591	19.6059	22.6984	23.7389	20.5108	24.6914	16.553	25.0461	15.6623	16.1707	21.9733	24.9118	20.249	23.5886	15.2495	26.2012	28.6815	24.7239
201374_x_at	26.1538	25.0797	24.7171	22.0904	20.3371	23.6229	22.0733	24.9219	21.7128	20.8838	21.8917	24.1195	25.8039	23.4712	25.5252	24.4844	19.8229	20.4844	26.3246	25.8805	24.1125	20.7232	23.6886	23.8398	24.8503	22.3777	25.5139	24.2866	22.1321	25.7766	22.3576	26.5928	21.2841	30.9992	24.797	24.318	28.2971	18.4208	26.3024	23.9094	23.1374	22.4548	32.7859	25.8914	31.6507	23.5155	27.9004	31.4474	23.0305
201375_s_at	78.0344	71.8956	50.5761	83.8305	87.1554	144.109	96.3178	119.459	61.9184	60.5168	35.0486	105.524	155.102	108.212	210.788	196.015	53.1122	199.811	167.355	81.571	144.9	185.436	126.452	298.908	127.541	304.338	250.257	224.779	171.162	55.972	35.227	82.4396	54.9275	41.3623	52.8039	68.5555	54.8881	18.8144	45.4804	84.3087	39.7391	152.489	59.0854	42.0488	37.8519	28.9211	34.7277	67.3375	135.42
201376_s_at	40.6402	45.192	55.0082	40.1565	43.8894	39.9181	39.824	38.5997	31.1085	40.2355	26.0477	37.4372	42.211	35.8955	49.7714	45.5786	28.8959	42.9741	35.0426	33.6557	52.4402	56.3907	40.2897	81.4648	47.8422	61.4543	96.8184	66.9334	60.2705	35.4746	41.3031	41.4409	40.777	43.0282	46.0645	39.7657	37.5437	45.3518	35.1052	32.7447	32.9205	54.4713	40.6403	41.8864	37.1919	28.5546	33.694	34.0394	45.3583
201377_at	144.145	111.573	56.2439	157.737	192.169	299.571	625.14	526.736	302.011	298.965	99.8925	146.119	236.857	65.0946	295.98	442.422	49.4633	298.153	200.13	164.699	248.193	177.837	58.7661	332.197	338.323	337.779	249.432	280.885	156.859	55.9279	59.5555	126.145	41.5366	23.3687	121.755	43.0114	43.6906	23.6089	36.7821	78.4698	70.909	202.9	58.2577	36.087	60.1324	20.4047	86.5826	41.1226	47.4677
201378_s_at	81.5378	81.3317	63.8041	96.1238	90.869	82.3621	67.2617	54.0729	57.7517	65.71	50.645	52.4723	54.5716	49.3823	55.5452	145.099	41.3024	89.6575	70.0821	82.733	109.588	120.649	119.276	101.664	116.451	119.909	137.123	158.938	119.1	64.1741	65.0705	73.5725	47.7564	47.6881	68.5769	54.1227	43.8311	87.8305	48.4763	61.4558	59.8181	116.938	51.8607	46.2257	79.1014	53.0587	44.8313	55.1703	51.3585
201379_s_at	104.381	70.9785	38.8711	62.514	104.136	68.2768	110.217	27.0215	31.4655	18.0382	26.1643	67.3261	92.083	61.1355	139.493	108.75	22.1084	90.3048	57.5128	133.563	140.477	124.368	442.871	191.026	131.272	276.958	199.324	217.798	214.424	52.5323	42.2394	85.2553	28.4461	40.2446	54.1823	61.8609	70.6653	24.0703	48.9708	69.0719	40.6029	148.115	38.9322	80.9223	60.222	16.6807	32.9723	71.3219	178.589
201380_at	67.4622	125.317	47.3176	63.6474	80.0156	88.0953	187.372	286.791	87.262	42.0359	48.8682	125.326	157.568	84.8996	377.37	123.256	70.0198	152.265	73.9892	213.959	276.937	239.319	183.962	295.789	203.009	309.822	313.211	346.764	128.446	49.6061	78.1359	49.6533	50.0087	30.0501	30.3422	68.4408	48.1799	42.0239	40.6425	204.922	43.5135	60.7437	41.8981	106.507	73.1748	42.5657	37.8542	34.6275	626.047
201381_x_at	171.727	204.336	145.058	129.449	205.662	107.35	176.814	158.781	199.276	107.362	85.2435	124.953	155.834	102.497	179.043	260.284	116.476	255.211	225.301	173.228	171.241	248.291	212.193	379.03	226.924	233.999	304.787	292.994	297.017	58.3552	42.1866	151.519	37.5526	20.792	99.5943	69.0259	48.099	43.8443	37.2557	77.484	55.2671	233.662	58.4136	34.2352	47.7153	67.768	32.7079	41.1058	172.177
201382_at	292.978	257.89	402.471	277.305	258.727	221.335	537.6	612.46	576.994	545.288	523.093	385.59	485.713	337.64	257.685	671.383	633.468	407.364	420.492	771.298	578.882	588.868	560.799	388.806	319.74	467.781	472.443	509.089	232.943	68.8887	99.5882	126.168	365.362	51.2415	129.789	113.086	88.1931	513.798	120.344	347.598	233.183	150.836	92.4784	280.99	154.033	193.681	286.154	58.317	247.509
201383_s_at	57.8007	36.0536	33.7085	43.5555	60.5923	49.2341	44.8811	51.2461	40.4508	36.737	38.7492	44.3273	56.127	37.2488	47.6582	49.4512	43.5991	45.7697	31.0212	55.8074	39.6822	43.1057	38.9869	51.1683	43.0499	37.0829	47.2239	54.1904	36.1581	62.1792	55.7143	81.0495	61.0077	72.1079	67.461	50.8758	54.8744	78.5205	77.1848	56.9805	67.5366	55.6845	41.8503	105.424	59.6471	63.4786	44.6071	43.6353	34.5499
201384_s_at	563.869	259.362	347.334	329.988	513.441	633.335	325.733	146.367	286.144	78.2992	295.706	477.547	732.633	293.014	819.276	445.81	265.019	637.073	227.565	664.449	532.479	912.117	118.815	1317.27	1579.34	979.33	1245.98	970.675	1663.89	4775.4	3947.42	4033.78	3520.52	5871.77	1972.96	6566.68	3710.01	7249.26	3900.38	5197.63	2062.92	1673.11	1943.44	4290.49	3534.16	2450.65	1272.97	1026.18	231.172
201385_at	468.427	405.098	271.935	356.438	401.458	582.4	763.236	777.821	1019.23	706.284	495.805	463.496	635.159	308.202	475.502	1122.21	521.968	859.258	701.388	612.167	498.678	465.02	113.062	870.951	714.3	712.36	513.137	594.071	624.174	165.875	48.7002	635.438	29.16	35.6348	231.116	90.0098	78.064	46.5817	189.858	293.058	169.717	318.428	92.0803	29.4042	171.39	24.1474	148.495	202.374	641.855
201386_s_at	378.917	317.77	317.154	329.922	256.285	531.2	732.936	344.208	670.392	666.457	375.914	407.183	641.979	341.785	333.269	962.993	471.842	983.298	394.652	477.325	413.673	515.001	87.7723	831.573	722.598	742.578	490.501	613.106	527.943	51.597	40.5515	373.676	25.2314	24.9315	237.087	57.9533	33.18	17.7135	45.8989	129.913	58.9534	256.446	62.1612	46.4162	104.344	16.1893	144.587	113.337	532.396
201387_s_at	35.7988	30.9198	23.7799	24.3853	27.4753	31.6474	29.4231	29.4809	62.9863	25.5736	36.3885	34.4217	31.2179	35.6741	34.6425	47.7629	30.4773	50.2273	37.6211	100.366	42.9822	48.4167	31.9986	40.1872	30.4983	48.2652	36.9132	35.1962	39.2696	33.2968	25.7887	36.211	26.4799	29.1069	29.5004	31.8736	28.9574	24.95	26.7277	41.9461	23.4227	27.3396	30.0127	28.0803	28.0264	26.0804	25.0775	33.294	30.8065
201388_at	42.4153	35.5987	34.827	36.6301	39.0041	32.5527	39.4301	51.9833	29.9077	20.0143	24.3276	31.5295	44.8067	25.6295	35.3744	53.8901	28.8587	43.5378	29.4072	43.2553	58.2582	46.6957	28.2007	54.4401	40.1387	67.7952	40.1902	67.8887	68.1796	50.7419	31.2459	53.275	29.3346	38.7904	31.8213	38.3267	29.7895	34.6837	33.6732	37.3727	24.1307	57.2429	36.2216	38.036	26.9783	37.101	29.5111	31.7179	42.1866
201389_at	89.7566	91.7912	143.861	90.7365	105.592	68.2685	100.65	91.0157	84.617	129.215	77.7558	95.5397	119.297	65.0675	138.041	115.105	89.3592	92.5003	166.152	154.337	139.909	130.88	80.6395	78.2248	172.414	228.769	85.5181	136.605	95.2439	107.204	111.833	95.0389	92.679	138.069	74.7637	97.9914	90.6983	142.469	114.668	134.443	78.6931	67.1873	106.997	83.877	90.5241	75.3158	101.451	68.9721	85.6202
201390_s_at	254.936	342.971	210.053	182.884	175.239	488.786	629.439	443.807	448.199	139.676	195.192	295.879	522.556	221.461	339.284	816.183	395.751	555.325	334.963	668.516	906.703	830.66	2343.42	554.428	1114.83	902.12	610.418	705.975	627.833	438.519	222.294	361.52	121.606	299.084	216.785	75.4131	286.721	116.67	250.409	292.891	124.4	671.148	111.599	264.894	149.113	58.8882	110.836	179.912	655.102
201391_at	72.8177	42.3759	32.7947	50.7765	45.7931	74.0554	64.6898	26.0789	37.9121	18.6741	27.4745	35.3257	63.8255	23.6439	37.5596	74.9847	25.8528	102.209	63.8691	74.4722	112.691	112.22	42.9448	229.127	93.9136	80.6413	227.907	214.001	202.169	38.0248	44.5596	56.2174	23.2434	28.6219	42.1147	60.276	60.8107	28.7421	41.1568	47.5959	22.6014	195.37	32.3994	34.992	44.5548	13.6455	38.6371	29.3891	75.3326
201392_s_at	41.4453	48.0579	59.3036	36.1648	46.4783	35.7176	28.6718	30.6726	29.1584	38.2324	41.7525	34.4236	33.0537	28.765	35.3718	27.805	53.4737	25.9234	21.8533	37.8877	30.2492	32.742	28.32	27.3161	54.4348	33.3346	34.0261	36.2858	29.5542	25.2935	30.217	31.8382	28.6773	24.8491	27.8018	24.0941	24.9922	45.41	26.1452	85.0265	23.7799	27.8019	30.1453	31.0849	25.5761	23.0779	28.6537	28.5375	25.8529
201393_s_at	53.4217	51.9717	45.1695	50.7178	54.6371	65.6209	8.60101	7.01844	3.39893	11.7911	16.9406	51.9371	87.4274	51.5765	95.2544	10.7895	11.1827	11.7795	9.27748	10.5052	10.4099	11.1276	21.4067	97.8731	69.4801	59.7235	26.0467	35.0819	32.8818	26.5826	18.3829	57.8165	10.1036	30.4081	78.236	23.5667	20.4702	14.0345	65.581	6.00836	36.5485	62.0513	26.7757	14.5392	93.8102	10.6665	50.9337	48.519	33.9558
201394_s_at	114.267	132.196	168.52	182.263	138.338	270.627	177.832	117.17	82.0158	123.249	141.002	182.29	329.187	169.904	140.019	210.154	84.5962	222.719	71.982	158.179	198.09	145.645	93.8942	166.384	232.856	325.907	184.172	190.778	118.495	70.1951	70.8572	123.04	64.8843	44.7599	225.491	89.266	62.4339	92.1989	67.5578	75.5026	101.784	259.572	50.3158	70.4102	54.4082	53.2738	74.8317	71.5075	114.834
201395_at	133.073	200.074	128.4	246.247	265.828	413.315	346.478	178.695	196.316	283.161	210.797	264.365	404.234	178.623	320.912	325.247	125.613	327.552	346.081	239.984	295.396	285.906	210.645	286.111	291.339	503.656	255.596	312.002	243.979	105.592	97.2847	264.323	69.4109	74.3539	209.062	163.644	119.537	26.5786	91.872	92.036	98.178	390.748	118.894	72.8699	99.7381	38.2727	144.88	94.4038	555.426
201396_s_at	42.1109	43.0713	26.2548	40.174	35.8237	39.8878	28.8103	36.882	20.0213	21.7442	23.9765	35.6711	45.488	34.3518	43.2149	43.9873	23.3969	35.8809	44.3036	50.8295	33.5768	35.3229	52.2804	50.0617	57.7459	47.0483	53.2144	43.8328	49.3419	37.46	30.6958	44.7467	23.9779	38.9389	44.1039	25.5245	30.0135	20.2286	25.0052	30.9127	29.3679	42.7074	34.1868	28.6508	35.8526	20.4122	27.408	35.3062	41.7326
201397_at	30.496	27.7206	27.3082	26.3985	33.9801	31.434	31.4695	27.0681	44.4164	28.6573	21.2926	25.6686	26.0465	26.2367	29.8346	36.8266	25.5296	56.0787	35.5919	40.2285	47.456	35.1401	33.0436	29.9415	29.0945	42.0351	39.8477	38.7376	37.6303	31.2433	27.7976	31.2983	25.6047	37.2766	29.1962	34.9315	28.2795	23.1607	37.6401	39.8142	25.9459	31.4377	33.8995	30.2512	27.173	28.6107	39.7943	31.8827	39.84
201398_s_at	929.544	757.012	813.555	893.826	898.536	1552.59	1714.2	1752.25	2145.23	1086.97	781.106	1068.44	1767.87	770.924	1224.12	1722.87	1331.98	1687.66	1342.2	1065.83	1073.59	1196.87	173.167	2311.18	2194.93	1484.06	1468.54	1447.15	1561.52	386.268	97.5559	698.046	117.161	235.805	320.924	273.928	153.535	116.927	361.133	490.887	153.013	300.893	491.345	132.945	320.144	120.726	444.161	534.481	1582.13
201399_s_at	449.593	521.401	363.007	702.691	803.424	852.09	676.402	448.834	536.202	542.839	519.998	624.986	612.986	541.464	884.016	332.457	304.078	702.081	776.591	529.845	473.978	562.605	500.708	1359.38	486.063	645.881	1411.02	1194.19	1427.26	1627.5	513.315	1041.6	875.379	1584.19	648.328	2455.87	812.545	1883.91	1333.99	1651.95	502.727	616.503	1945.32	1549.27	1123.12	3986.37	594.598	667.361	431.536
201400_at	172.167	165.314	63.3339	182.431	89.5661	175.448	295.875	186.771	90.8501	64.9226	72.5567	157.607	274.597	143.154	216.336	469.62	80.3226	208.878	93.5957	104.523	257.116	300.105	78.7163	303.493	361.9	565.3	251.867	252.427	191.058	105.739	62.8872	143.512	51.6657	83.9887	160.974	103.506	79.2943	60.1634	63.2221	63.6935	69.425	517.674	73.9965	67.252	68.3139	75.4086	28.7607	179.14	496.376
201401_s_at	29.6448	27.3319	29.4218	27.1587	27.0786	33.2568	25.6685	22.1213	22.5419	22.3249	21.0698	24.4855	33.1156	18.8477	27.333	28.4298	18.5582	27.9214	24.9859	28.1508	26.3043	26.6142	25.1631	32.9938	22.1188	32.3653	29.3683	41.8338	27.6078	32.6539	31.1356	27.523	18.5415	25.0759	25.5981	20.3713	24.0683	17.9023	25.3718	20.3844	24.867	20.6011	23.8956	25.3087	24.2663	18.014	23.8958	26.9989	43.0925
201402_at	25.9683	30.8673	24.9052	27.3807	34.3183	32.532	25.7168	23.541	14.7606	30.5548	21.1748	29.1465	35.5072	26.3378	36.4447	24.4574	23.1191	25.9114	29.7718	24.0728	31.4952	28.2946	27.5281	39.5897	21.4943	43.252	36.3059	30.5724	30.84	34.2056	30.5709	33.4506	31.1361	34.9885	32.2243	27.3719	30.9031	22.0804	24.7032	22.4976	20.9019	30.3779	27.7718	24.6429	30.4746	26.1537	29.0053	37.3804	32.5997
201403_s_at	335.102	381.867	182.327	193.238	386.114	305.392	974.247	405.501	815.6	233.963	301.768	515.102	601.908	597.507	648.673	440.179	150.762	571.87	507.753	442.809	362.039	488.471	467.075	1995.82	2055.89	947.929	842.07	550.764	1957.96	2569.8	994.379	3911.27	1660.64	1641.29	3112.27	2458.84	830.064	2842.68	1130.42	1157.73	3268.39	3343.29	5259.34	1964.13	1611.24	3690.36	2143.04	2390.33	1952.19
201404_x_at	666.93	799.926	773.535	624.871	1197.19	645.919	1182.15	1092.67	1200.7	1090.81	816.864	928.305	755.803	1038.1	1158.68	809.666	1197.79	1260.63	1048.44	584.102	616.568	514.617	1286.01	789.853	510.067	553.005	758.282	823.672	1570.03	418.229	537.029	388.855	572.626	527.375	613.583	1052.85	511.681	331.811	751.635	399.539	442.798	351.934	1498.53	386.989	661.758	1026.75	1038.62	685.596	776.346
201405_s_at	110.468	118.656	92.7249	62.595	71.438	189.153	248.673	155.026	191.493	163.725	47.6803	104.22	181.845	89.9426	151.284	343.527	89.5708	256.628	164.976	150.766	292.915	285.741	95.5947	399.318	333.243	532.345	335.289	288.99	460.702	105.535	70.2152	281.722	83.4593	57.4825	238.64	71.2474	95.7472	52.4494	97.9502	80.6088	62.6511	560.29	53.1304	62.0177	48.8364	46.644	38.558	85.1237	102.928
201406_at	5358.88	3926.35	5155.44	3077.06	3002.74	3208.18	8549.01	6414.15	5635.81	5263.99	2430.57	3036.14	4632.76	2171.47	3475.25	7611.15	6831.69	5878.07	5148.54	4364.95	5617.02	5073.79	3292.42	5569.56	7904.13	6213.22	3916.17	5098.83	2932.81	1242.98	518.685	1452.74	1043.52	688.917	1705.15	1571.13	665.895	1291.73	1377.24	4448.59	1887	2372.85	3493.43	904.425	1147.47	2496.04	1916.07	2869.36	5890.88
201407_s_at	1484.76	1593.54	1834.51	1391.59	1534.89	1372.19	2207.36	2129.13	2264.29	1197.57	818.55	1174.01	1627.35	959.979	1485.59	2104.7	2231.39	1715.67	1817.81	1661.37	2102.61	2322.91	790.04	2240.01	2132.7	1702.56	2443.73	2563.28	2710.76	3161.23	3070.54	2843.89	3005.82	3750.44	1955.47	3710.42	2779.81	3828.71	3157.71	4481.5	1907.39	1613.45	4272.02	2954.58	3120.13	4130.45	1945.41	2205.54	1777.55
201408_at	805.136	701.375	587.375	772.553	715.586	1229.7	1008.99	787.572	1542.95	732.183	667.382	828.895	795.547	794.609	1118.93	818.88	913.321	1087.45	840.235	1374.54	1211.18	1760.61	552.09	1307.06	1405.25	788.606	1960.05	1557.36	1414.41	2789.22	2003.68	1710.71	2103.8	3547.67	975.967	5226.58	2052.41	4080.6	3016.03	3965.02	945.365	784.545	1394.9	2944.11	2680.26	1613.33	1276.07	1022.41	741.569
201409_s_at	1788.21	1584.01	2439.17	1655.05	1388.19	1364.13	1724.86	1728.17	1749.76	1413.05	1227.45	1415.01	1527.29	1213.14	1762.8	1938.38	2186.02	1671.3	1372	1464.38	2124.8	2320.45	77.6663	2219.32	2587.02	1472.54	2495.84	2305.86	2983.42	4075.66	4329.51	3146.79	3181.68	4287.6	1882.22	5962.28	3093.62	5463.39	3769.64	4982.73	1712.51	1783.17	5014.55	4416.52	3206.54	4369.63	1745.76	2207.2	1449.83
201410_at	799.573	503.434	383.215	475.087	641.993	657.191	343.545	358.11	450.055	283.315	552.942	619.868	668.851	373.167	1069.76	663.905	404.822	506.857	569.363	674.583	713.572	820.258	138.263	861.341	851.253	746.079	1363.23	1222.82	1408.65	1145.71	472.956	1073.23	869.922	1325.13	276.171	1778.75	790.976	1394.17	1028.76	1557.44	270.352	430.107	1821.95	940.407	1294.63	655.379	390.421	289.701	662.758
201411_s_at	288	233.275	178.559	260.729	370.861	319.332	341.136	184.539	283.325	249.285	215.031	294.446	318.621	184.762	593.789	377.866	107.069	219.122	228.252	474.139	422.024	471.431	1014.51	499.264	674.124	714.598	766.701	683.112	1096.72	874.875	518.883	553.525	898.674	1006.86	146.423	1561.76	627.316	1118.28	931.542	1116.72	259.37	263.889	789.811	831.388	901.997	738.412	477.291	405.842	415.586
201412_at	53.5539	75.442	62.3899	64.7879	86.5376	95.1152	29.5932	36.3125	18.2058	30.537	29.4814	55.2283	90.1497	40.3841	86.6806	28.5273	30.525	25.5628	30.6655	68.8943	43.8624	61.7982	69.6736	76.112	41.6926	91.041	83.6265	78.8047	69.764	335.592	371.569	346.245	294.758	769.551	197.016	372.924	576.234	150.207	550.525	251.484	137.4	219.583	770.247	314.124	341.127	368.724	122.263	109.423	58.1334
201413_at	550.631	486.335	655.525	635.47	487.927	495.515	472.162	470.8	619.728	361.218	593.549	506.367	599.716	387.255	476.939	489.29	398	767.079	343.645	420.069	392.963	559.591	175.293	855.381	483.185	584.677	832.772	658.517	570.193	385.581	253.145	324.779	174.836	378.163	335.101	124.888	709.241	189.693	560.989	371.633	247.609	319.692	380.735	238.03	406.79	279.001	260.141	214.663	234.783
201414_s_at	220.088	227.578	153.795	227.692	341.297	515.694	447.067	265.288	375.556	193.814	172.805	270.079	500.188	160.067	384.564	606.823	202.563	622.51	403.275	919.719	1205.94	1223.36	157.355	710.16	1056.39	868.708	1008.05	948.117	1434.34	4055.78	4032.71	2785.73	2399.1	2883.13	1094.6	4051.82	3335.06	5337.52	3220.04	3140.78	1213.64	1390.98	1803.97	4018.89	2577.48	2674.31	693.523	943.503	401.722
201415_at	36.2396	32.7046	24.3779	22.5738	26.6871	27.4403	72.3669	27.8214	19.677	9.21057	7.01489	15.451	33.343	12.087	20.1596	64.6735	12.6383	54.8692	67.6554	42.1726	77.3198	73.3988	27.2411	62.9531	62.3888	70.6828	71.3848	49.6376	41.4721	22.6391	16.4102	21.916	13.7728	14.048	14.9458	26.3784	20.4632	10.8518	20.024	31.0357	15.3356	157.228	13.1585	16.1181	13.4636	9.67139	14.6504	57.6515	13.1171
201416_at	36.3186	32.3381	19.4642	25.5784	33.5247	26.3842	117.675	67.4885	66.0984	22.2279	30.3402	36.9412	48.2587	31.9876	39.762	99.3114	41.6664	78.4745	62.8551	97.4676	221.2	101.363	66.4504	63.6524	77.7494	85.6683	54.4718	85.7564	44.3958	51.8905	48.2272	40.3929	33.7616	45.6258	29.1841	42.0861	45.469	30.7929	36.2383	105.926	23.4874	31.7025	51.4092	57.7383	33.198	50.6935	28.54	31.9794	49.1974
201417_at	203.39	413.607	187.337	207.497	164.389	318.989	811.854	736.348	1019.02	35.6045	196.34	241.073	397.036	238.079	181.984	1461.54	1976.83	1646.75	603.831	749.093	1230.68	1002.31	63.4152	919.401	726.44	421.011	680.329	688.757	520.222	10.2901	21.8898	12.111	7.8432	9.44836	29.5511	34.3491	17.4613	8.09004	310.704	186.938	28.885	20.314	66.0758	12.9751	42.6658	10.7546	109.571	14.0712	384.927
201418_s_at	468.978	717.93	248.638	193.256	278.107	259.67	1593.12	674.775	1391.02	132.895	549.639	558.086	685.379	498.958	516.097	890.504	864.552	1640.24	1160.55	1853.75	1193.25	899.078	151.21	762.66	626.072	994.924	741.859	917.708	827.968	40.9576	61.6633	47.8243	44.4296	28.3801	75.0695	85.8693	73.4182	38.1079	86.9344	458.732	49.2408	37.8337	555.931	59.8125	76.9099	36.4514	194.527	50.5532	890.898
201419_at	27.6381	31.8595	25.4127	27.5633	32.8137	32.8089	50.5166	23.5305	20.0976	15.1016	21.2481	27.9227	31.8459	25.274	35.5455	39.9926	23.8504	33.4399	30.0907	45.0286	35.966	28.5931	34.567	39.3519	32.5557	36.1401	33.9971	45.2362	35.6017	37.143	32.306	53.7663	28.457	46.2668	45.6789	47.8907	45.8504	24.1836	55.2474	30.545	19.1647	113.375	54.8648	38.9594	55.2163	236.904	25.9963	50.3875	32.7611
201420_s_at	27.1696	23.9031	22.4687	24.3104	21.8184	30.8007	19.6936	15.6379	9.91667	11.0371	14.2356	22.3993	48.7773	14.6748	24.7041	28.723	12.8966	19.7554	14.7859	20.5228	24.6161	23.9066	14.0431	21.8205	17.6713	25.5834	33.5414	40.834	22.5227	12.3649	15.5788	10.5565	13.2799	10.6173	15.3871	11.1648	15.5971	12.6858	11.4574	15.119	8.92308	16.3942	15.4876	13.4809	15.6385	10.9338	11.0577	12.8255	28.4377
201421_s_at	249.904	377.923	193.166	236.974	243.439	418.417	258.281	262.237	409.119	86.5705	350.254	304.069	476.736	149.688	342.008	446.777	169.021	396.961	291.195	289.838	260.571	221.664	38.8957	313.663	309.315	344.811	254.601	274.131	295.888	21.7666	27.9884	57.891	43.2323	19.5083	32.8506	28.1867	22.2842	16.1066	21.5472	96.4542	21.8002	92.8583	80.8298	33.7066	21.715	11.923	46.9469	97.8487	375.241
201422_at	749.452	541.402	402.709	511.155	575.141	399.55	53.186	133.147	30.3382	34.071	341.281	550.714	445.054	633.941	955.28	34.1767	42.8544	29.701	70.8053	18.2276	32.22	41.2009	68.4784	294.585	83.4943	650.763	243.319	49.3266	285.273	48.7108	29.0415	57.5845	23.8326	43.4719	21.0849	35.2702	38.2364	35.0883	51.6857	24.4122	33.9067	89.803	49.4368	45.0255	67.2199	17.3888	103.433	393.701	756.016
201423_s_at	153.583	156.859	82.954	128.051	90.2919	289.454	72.18	74.3994	78.8274	37.227	43.2438	92.2649	181.07	61.7413	149.899	156.729	51.8873	200.959	171.521	107.315	215.226	385.676	92.8627	334.559	152.936	115.538	376.334	354.239	394.528	993.633	503.861	831.955	850.135	1550.38	582.451	1703.9	679.535	1177.46	1205.73	873.679	322.155	425.137	205.486	1325.67	1575.1	168.893	476.174	264.252	301.91
201424_s_at	569.661	469.308	321.708	458.554	426.676	708.036	723.705	754.192	1051.68	508.216	348.526	460.133	741.058	268.964	645.285	818.206	775.895	823.127	769.846	508.809	656.714	929.999	37.4231	965.673	833.188	482.698	948.444	904.033	1766.74	1692.12	1341.03	1350.01	1496.53	1850.66	989.47	2171.08	1463.92	2017.41	1764.88	1468.88	863.399	674.988	1885.46	1573.28	1796.3	1421.8	1009.63	715.416	670.482
201425_at	139.458	112.444	59.0828	61.1453	92.4131	59.3557	74.8961	111.176	53.5262	32.615	25.0356	103.802	193.83	79.8483	299.626	82.6825	38.4866	70.2651	62.2949	57.6138	113.171	75.3344	62.6418	184.69	75.8202	364.245	76.0595	229.071	90.1135	28.5162	37.6999	25.4127	35.4608	25.1205	33.5219	39.8611	33.5213	33.9971	25.2905	57.9314	40.8991	33.9611	44.6452	42.9339	27.9605	34.931	27.1324	33.9257	326.97
201426_s_at	1291.96	1195.48	446.949	520.772	686.17	316.485	1267.36	1979.8	1382.76	702.947	597.575	701.674	856.212	519.629	911.749	609.505	425.729	970.369	1136.53	896.809	650.992	600.109	137.269	887.143	331.681	978.161	426.173	357.44	196.498	35.0192	43.3724	24.3347	25.4176	14.9276	34.5917	40.7897	39.7061	50.9762	29.5248	255.94	66.4435	39.2547	36.6577	43.6799	27.2447	20.3892	79.1617	48.5641	1110.21
201427_s_at	1127.76	65.4172	29.9216	94.1114	127.811	136.27	311.165	166.048	97.9599	29.7445	20.7645	40.9263	43.5059	60.2322	51.5595	102.082	38.7442	720.482	813.842	179.023	338.537	224.877	62.2309	129.91	70.1888	92.6034	209.054	322.943	125.286	482.41	146.731	58.0517	192.02	106.009	70.4162	102.544	660.038	47.362	260.318	33.4133	159.741	36.1696	73.4241	47.4927	135.632	31.1509	207.158	203.324	22.9663
201428_at	43.0611	36.0531	40.6227	33.8061	40.2313	40.6175	39.1027	44.8859	57.0669	33.761	43.5704	41.508	38.6102	43.0586	40.9801	45.9556	39.4298	52.8594	45.7464	39.3014	42.1959	32.7319	55.9916	39.6101	35.1677	44.7324	46.6577	44.4911	53.3635	42.0287	36.5512	44.0398	35.605	44.4209	44.2669	37.9292	39.9534	29.7667	38.9271	35.4529	38.8152	42.372	43.2003	36.6505	56.0056	40.7345	45.6477	56.041	50.2061
201429_s_at	6808.48	6251.51	6825	5055.96	4658.26	5091.01	11406	8903.58	6600.06	7426.6	3635.21	4582.89	6779.76	3716.54	4815.85	11081.5	10596	8074.93	5687.43	5315.39	7719.46	7216.19	3851.67	8202.47	10820.3	8629	5515.13	6815.74	3903.46	1871.73	895.578	2619.63	2456.76	1356.84	2560.98	2489.35	1027.07	1890.19	1638.59	5602.71	2644.45	3947.24	5421.99	952.312	2143.24	4504.25	2610.57	4014.97	6901.94
201430_s_at	25.3587	31.0142	22.6818	28.4178	33.1161	26.9757	28.8836	29.505	22.9287	28.8077	32.6386	33.1958	31.9486	31.9337	36.4669	36.5498	31.4357	34.8356	29.4864	33.2522	34.3371	30.9367	31.8247	34.0613	28.3282	32.623	28.6087	31.7073	31.5601	30.6515	27.9955	26.8332	23.355	29.2689	27.9942	26.997	24.1634	26.5903	25.8847	46.0725	29.1528	35.0668	29.3667	27.0854	24.972	30.7047	32.014	29.2335	27.3597
201431_s_at	24.1256	25.4677	19.3832	26.1044	22.9519	26.9846	22.2119	18.2223	32.4423	21.331	21.1239	21.9541	23.2444	22.3521	21.1667	26.0654	21.1326	29.283	24.2452	30.8152	22.7515	22.4736	20.8839	24.2615	19.3379	26.0321	34.2039	26.0445	25.0903	22.5255	24.9028	25.2949	19.0704	20.8863	21.8635	20.6031	20.5706	20.0027	20.9828	25.2733	20.4708	23.8564	21.0683	22.1686	20.904	21.6646	24.4063	21.8903	27.5685
201432_at	286.032	289.76	106.982	228.624	189.16	254.681	403.102	243.182	332.959	33.1603	129.895	246.542	362.165	216.107	363.41	530.147	305.026	544.571	641.854	616.233	789.681	776.369	172.884	817.05	670.931	484.919	926.169	1237.85	1098.37	3692.95	2045.75	3284.87	2317.41	2736.73	1564.59	5038.16	1907.38	6236.66	2879.56	2548.61	1545.51	1750.37	2146.73	3443.78	2139	1687.29	1353.89	1074.92	274.389
201433_s_at	1986.75	1670.37	1878.27	1287.05	1737.03	1320.95	3074.28	2863.03	4068.06	1652.62	1571.09	1563.12	2056.79	1073.01	1721.73	3422.26	3115.28	2729.75	2236.53	1761.65	1911.03	1955.18	2329.97	3097.31	4125.16	3030.96	1629	2141.68	1330.53	323.035	92.5562	495.69	204.402	118.174	379.906	197.618	91.1439	50.2075	188.262	1052.96	354.146	565.67	2313.32	79.2399	209.663	494.282	490.699	344.562	2301.9
201434_at	89.2416	90.4049	55.6271	80.2827	70.2391	160.606	39.2478	49.2325	44.1233	18.988	23.9752	52.7128	105.671	39.3357	77.4746	106.947	27.0329	144.275	47.6549	146.512	243.459	204.557	62.569	215.547	132.122	199.089	305.32	275.837	154.132	893.653	338.481	659.565	592.065	1156.78	153.758	622.23	880.091	749.238	658.319	646.132	142.041	271.127	314.332	813.274	748.224	1046.11	179.838	123.431	89.6255
201435_s_at	226.407	390.533	220.638	380.744	465.406	408.492	394.437	475.452	358.556	257.995	235.479	318.793	403.111	300.908	361.599	477.744	628.626	488.803	589.836	454.983	554.007	733.68	200.073	621.017	505.829	388.375	960.639	701.697	1330.11	656.903	450.563	522.014	463.571	795.582	366.711	1024.7	406.72	636.581	593.044	604.486	294.643	373.213	1021	675.349	520.29	182.776	492.926	412.944	282.132
201436_at	157.852	200.843	155.3	247.386	227.274	430.303	621.87	509.474	666.783	167.469	148.66	269.891	491.933	192.835	376.24	693.997	572.85	624.7	505.454	798.155	617.429	662.739	1053.63	880.643	769.307	603.084	1018.35	855.762	880.442	566.721	243.333	594.823	330.945	473.568	623.097	269.288	305.586	260.606	485.288	649.029	323.566	458.91	1179.75	433.825	428.067	171.929	481.511	450.117	739.232
201437_s_at	1567.98	1433.63	2321.86	1157.08	1532.18	1219.02	2610.6	2311.99	2602.24	1522.08	1108.6	1233.15	1721.01	973.247	1245.33	2516.98	2721.8	1712.85	2002.57	1771.85	2150.7	2076.77	1138.11	2108.09	2407.94	1875.7	2161.45	2341.08	2340.66	1384.1	1084.79	1181.09	1153.12	1248.45	1140.59	1653.43	827.564	1942.91	1205.3	2226.78	1311.73	1207.37	2038.14	1165.25	1081.11	1646.53	1107.45	1109.84	1595.25
201438_at	39.1899	42.0809	54.7479	92.7572	78.0807	56.2297	46.569	53.1742	33.7423	47.4651	56.7641	64.7609	62.7717	67.8386	72.7675	58.4338	45.8807	57.8779	56.9286	44.722	40.6871	47.8022	64.2274	153.448	104.044	131.717	91.2005	79.9052	115.327	41.257	56.8882	39.3807	45.858	43.4802	40.8717	47.6017	47.2481	42.1048	45.1773	39.766	88.6949	62.6286	45.8896	38.3189	70.652	34.0862	80.9772	50.9972	48.5069
201439_at	58.7985	36.742	90.7479	34.9225	69.1657	34.0629	54.2666	53.8725	59.4274	51.7183	50.8802	41.5309	40.1563	37.2978	39.039	48.8677	48.3815	35.2864	41.0529	51.4923	48.4986	61.3297	47.2705	38.2803	82.5557	62.6159	41.5577	53.3856	37.6248	40.5057	48.4023	35.8742	53.9627	38.1593	44.8622	48.6069	47.9398	66.2391	31.9855	88.7433	55.1276	44.3244	41.2325	42.132	37.9882	37.2348	39.0237	46.3273	32.6636
201440_at	35.1417	33.9683	24.445	30.8499	33.854	35.7683	32.8915	36.5421	21.019	19.6673	19.5386	29.6165	40.7903	26.1289	36.9454	42.4951	19.7863	37.034	25.6146	27.358	36.0609	45.0523	81.2588	37.5469	40.629	47.1657	63.2522	43.7208	46.6569	34.2224	24.3308	26.0973	26.2994	27.2537	39.6001	35.1639	37.2103	18.5685	34.3509	29.4477	23.6785	68.7548	23.383	27.863	36.3797	21.8505	22.9836	25.7785	26.2085
201441_at	448.245	345.735	235.047	195.031	276.202	564.04	1008.51	843.158	1017.54	294.481	232.453	352.48	493.653	279.798	480.772	1015.43	736.219	607.153	622.24	788.856	918.546	1149.9	542.951	640.15	1313.52	1003.5	664.266	823.208	1431.26	671.07	792.522	538.815	872.308	701.307	404.856	1182.04	434.25	563.244	532.606	874.544	254.897	844.724	1165.54	477.325	565.797	716.699	366.194	361.527	735.711
201442_s_at	73.9241	37.562	86.1891	38.8196	70.4953	41.3083	25.7777	23.9232	61.0357	30.5006	39.5584	30.5228	23.4723	28.1728	33.1796	31.5698	56.0545	35.0703	19.1492	75.4189	34.0123	58.5016	23.919	71.5513	46.3819	35.5385	78.4549	41.6347	38.3673	54.0638	39.1192	61.7239	43.6169	52.2521	48.9968	43.5293	48.0788	87.6342	91.8601	66.4608	28.2901	45.5908	89.037	44.3244	123.946	30.8596	47.7761	38.7461	19.2924
201443_s_at	598.325	322.265	388.967	344.89	673.979	459.772	663.01	739.385	700.883	551.881	301.768	448.567	568.219	323.538	729.782	507.091	369.718	549.434	457.256	656.297	461.087	673.037	145.165	803.448	841.179	663.948	824.304	1007.88	1067.13	1072.42	1103.48	882.967	1015.34	1205.11	629.194	1882.35	1228.55	1876.38	1134.75	1549.19	702.475	500.328	1385.48	1280.32	1081.94	1077.17	607.064	583.255	617.693
201444_s_at	48.1642	53.1835	51.3335	58.7798	82.3882	80.2929	22.4742	21.9084	10.8206	12.8604	12.1667	32.4862	47.6918	28.3209	67.7753	33.1264	18.3345	43.4194	22.8958	28.1459	40.0204	62.6767	32.632	125.147	21.2025	54.8392	89.6579	181.689	61.8262	302.704	65.2473	185.178	72.2965	244.509	94.0735	99.535	328.766	109.972	221.114	44.3969	30.5861	86.9218	66.0424	157.516	309.884	106.745	64.0836	176.578	33.5452
201445_at	29.1594	35.2833	24.8743	42.4799	30.9867	34.627	28.9825	74.4845	40.6844	28.8825	37.1191	32.319	24.4485	42.2149	28.4786	33.2691	33.1031	34.9645	31.9707	39.4609	57.6361	51.3429	30.1414	29.1218	41.0721	32.1954	31.9816	32.571	29.1597	69.4505	39.5775	83.3562	33.6548	44.5519	162.716	39.2582	41.5905	66.8731	55.3726	47.387	38.0288	44.3271	71.7575	53.4008	45.1291	33.3928	30.2302	62.5582	22.1387
201446_s_at	72.6248	66.6389	78.9299	129.334	123.091	100.769	86.1624	47.2756	17.9593	9.311	32.9554	65.1659	142.726	43.9222	87.2909	50.2688	20.9964	167.605	95.4358	27.6514	46.9172	53.0488	26.5075	131.465	34.7684	58.119	138.03	112.977	37.6789	31.0582	17.8149	23.613	13.1933	17.9413	32.6186	14.4507	17.6333	10.1111	16.148	33.6808	14.8174	20.3186	22.0088	18.0031	21.8507	8.54266	67.6025	16.3351	260.82
201447_at	98.5601	89.8105	97.9507	97.1523	74.5563	135.867	126.684	155.231	117.426	53.6847	50.7552	92.6252	227.101	55.1238	115.845	138.457	89.5938	282.893	220.111	100.344	146.17	155.77	26.4451	261.872	110.476	150.84	174.691	153.839	120.953	19.1008	16.0782	30.7053	18.7105	10.2662	37.7109	21.2242	17.4125	23.0835	20.575	42.5244	13.624	39.8057	14.9458	17.0364	15.7549	11.513	19.2551	22.3499	84.3222
201448_at	198.95	228.901	149.564	280.149	212.972	417.367	540.229	247.839	527.405	85.3153	166.859	223.101	455.304	138.009	236.292	363.063	247.965	592.526	492.3	195.869	219.426	217.198	46.1924	388.106	192.853	325.216	270.805	253.118	116.951	11.9679	19.3713	34.9034	23.286	9.42652	37.8539	24.0192	16.6935	13.0538	16.5771	81.6121	14.6915	47.3821	14.999	18.0799	12.4572	13.5902	42.5268	27.0301	435.676
201449_at	334.258	513.706	375.543	517.72	398.281	939.474	1187.72	552.849	1075.97	424.444	439.7	521.459	1012.4	320.945	517.535	828.964	700.403	805.767	1018.41	345.968	533.204	496.199	257.639	654.035	602.28	638.013	441.422	446.742	394.98	79.5551	34.3873	140.042	36.9589	36.3938	144.225	37.2201	49.0928	25.2794	31.6763	118.616	77.5795	168.864	431.459	21.8009	64.7104	58.4597	106.02	135.42	742.836
201450_s_at	237.483	231.801	124.961	220.864	317.822	388.314	392.365	310.555	381.084	185.341	182.126	243.183	427.044	153.54	292.868	290.75	163.06	442.822	328.632	272.16	193.352	181.528	58.3088	457.739	219.064	328.45	328.637	317.946	226.44	100.635	31.0614	147.518	33.4964	27.3263	104.119	43.6267	39.8903	15.1327	45.6541	122.974	38.18	109.655	34.7913	65.7625	37.9946	17.2977	57.208	68.7228	284.681
201451_x_at	40.8124	57.2833	91.7107	45.0324	38.285	64.884	45.7262	44.2495	61.9007	47.9746	31.8969	34.3442	33.8761	31.5223	40.8464	72.748	47.8326	47.2852	26.5452	56.5018	58.9774	113.52	37.9047	92.0605	72.7309	84.2318	111.002	76.8928	49.7445	50.7661	30.3484	61.0242	27.6047	41.0468	74.1826	46.022	53.9156	98.6953	48.2339	60.3077	45.7088	67.6903	60.726	52.8716	70.9277	29.2477	42.7719	31.269	42.8296
201452_at	28.9289	26.5688	29.2389	26.4568	29.06	29.6382	27.1224	27.4684	18.4582	35.1074	24.4651	32.0173	35.8432	31.1638	38.4533	27.4684	22.3248	46.5327	35.5576	25.9324	30.6954	26.7686	33.9154	33.2235	23.3851	31.8122	39.0549	40.0173	47.6515	45.1288	35.3054	44.1114	34.1266	48.2099	37.7746	38.1511	37.0062	24.151	37.2565	23.8205	26.8779	56.7503	55.4784	34.8114	40.8834	32.456	34.237	46.38	38.7462
201453_x_at	346.619	379.164	197.471	414.178	412.339	460.222	888.226	630.056	988.196	737.035	207.126	358.358	617.156	231.129	558.19	956.515	651.729	1114.54	738.338	607.967	660.193	953.42	78.101	1512.98	997.69	790.012	1334.8	1120.06	1326.27	496.057	191.461	879.261	343.74	455.706	971.811	861.244	496.899	247.274	466.836	562.078	488.783	776.868	2684.99	556.193	687.988	119.285	562.614	376.088	892.392
201454_s_at	109.467	101.126	72.9178	141.692	152.924	170.204	88.3922	47.2394	66.2373	45.2022	57.575	105.117	184.194	75.9716	151.541	113.648	33.3829	177.131	88.5675	196.578	83.0883	74.0042	34.6093	226.29	52.9877	161.51	215.444	157.722	65.113	49.3889	21.9416	41.4811	25.2838	43.3841	31.5281	42.1609	36.1894	30.526	69.5978	51.5949	39.9898	53.6812	31.0662	44.422	63.3281	20.9797	30.8221	64.7458	140.874
201455_s_at	1265.43	1482.54	1458.25	1472.73	932.767	1462.88	1756.59	1185.94	1939.96	544.619	1412.24	1368.61	1530.06	1301.88	1247.18	2548.45	1808.65	2758.75	1830.46	1147.92	1263.54	2102.26	226.504	2696.68	2609.27	1473.11	1672.74	1344.23	1504.32	330.717	63.6488	844.883	87.9107	190.107	261.035	125.146	101.189	88.3215	324.306	397.182	113.066	545.098	57.5138	233.442	390.597	37.2037	452.778	309.773	1563.97
201456_s_at	315.897	515.104	274.139	300.254	408.749	630.398	603.89	620.246	844.984	1004.97	639.342	616.23	829.234	427.011	636.973	1004.39	540.274	1248.29	805.085	422.658	447.697	625.691	118.161	1184.67	877.441	676.167	848.876	619.826	990.267	463.785	36.2995	393.218	49.6307	24.1781	478.616	74.293	52.6397	12.1388	50.6855	71.1431	117.043	414.883	1207.06	20.7814	137.244	38.2147	198.993	353.928	1230.7
201457_x_at	58.0762	65.0009	75.4896	51.1171	63.4374	85.13	52.1054	40.3875	23.6365	49.2304	36.6661	51.0492	84.3199	42.21	52.0412	111.399	30.6506	50.0028	39.5611	55.5744	60.4659	49.6511	38.6462	127.299	79.3754	136.375	91.6164	93.5399	46.2617	70.7792	24.1504	51.0248	21.3322	18.3742	56.1522	23.8004	18.5261	24.0771	27.4161	41.4992	32.6376	152.594	16.4875	18.5731	14.2239	11.2438	27.1227	39.6428	44.6261
201458_s_at	1132.44	1410.81	1472.07	987.965	1304.11	1252.65	2384.62	2370.3	2576.27	2051.56	1408.83	1377.76	1965.8	1009.89	1288.32	3866.23	2691.43	1965.2	1811.14	1320.43	1654.16	2006.82	2499.66	1980.89	3371.18	2156.2	1456.98	1789.91	1329.26	580.804	36.6772	697.545	287.459	76.2284	746.54	481.354	54.6233	68.3269	233.094	905.032	454.845	789.503	2615.9	103.903	147.223	451.722	699.74	278.987	1710.16
201459_at	51.6387	48.547	67.9734	33.4037	41.9171	42.3256	82.2544	110.866	61.6827	50.4952	39.5422	44.207	42.4217	45.6715	49.8504	157.655	56.6817	69.6762	47.9425	62.3694	125.724	121.003	74.0658	72.3754	181.387	150.427	109.207	91.2395	112.462	48.6607	45.1506	72.2326	35.1466	48.5607	54.5517	54.771	61.5407	61.3828	43.3572	50.5025	27.8075	432.845	69.7425	41.1775	36.7674	34.7052	28.7836	52.213	43.395
201460_at	439.829	594.555	304.574	456.907	670.776	760.341	485.039	349.094	507.454	339.497	589.953	857.708	1084.46	777.189	1088.43	245.348	74.0221	475.921	351.595	701.22	290.007	277.26	228.449	961.156	487.008	788.367	674.907	743.525	538.485	476.64	112.269	587.819	205.939	775.501	161.113	346.77	562.829	308.801	385.111	653.471	265.775	135.701	510.655	504.312	411.229	368.294	306.164	222.815	1142.01
201461_s_at	113.517	170.733	164.607	124.772	72.3963	147.508	108.217	217.764	222.159	163.121	320.598	149.534	131.93	181.193	65.2404	170.696	384.089	74.6446	75.1965	116.148	105.118	206.652	104.087	65.997	447.377	87.9518	69.0562	65.8493	89.1351	75.5243	101.206	59.3187	120.726	64.9278	70.451	125.572	98.6073	469.497	100.665	429.162	210.254	82.7375	81.1706	117.332	72.1863	136.693	56.6844	64.4543	63.2185
201462_at	68.7359	49.0285	31.1985	47.6741	82.8184	46.3895	35.711	57.226	32.2776	20.0629	21.276	52.9907	84.6722	47.7503	91.6628	75.5611	23.4339	77.3933	45.2348	55.1078	63.0824	44.0185	36.252	110.5	59.4894	98.8189	86.6773	56.5674	73.4995	32.585	21.7522	26.9152	22.2869	23.7221	23.6882	25.3558	21.6742	20.8714	19.551	42.2773	25.0384	17.8233	23.1164	25.8095	25.7699	17.5335	29.3522	27.1419	39.3402
201463_s_at	339.089	239.137	327.619	208.256	342.708	353.646	1036.61	965.533	815.231	187.849	176.289	359.985	500.207	250.1	761.469	1366.88	1044.65	777.462	679.568	1168.33	1825.89	2314.33	3632.19	1323.61	2387.95	1758.44	1510.48	1762.04	1892.68	3599	3261.85	2641.03	3150.91	5040.95	1781.24	4147.01	2331.32	5404.16	3346.89	3895.41	1154.61	2030.38	1972.25	3716.33	3093.91	2736.37	1503.52	898.782	884.513
201464_x_at	63.6413	73.1009	48.4098	90.4557	69.6067	200.487	45.068	35.8511	25.9896	280.002	29.4688	59.8388	77.1248	56.6263	99.6223	62.4876	29.4983	143.097	172.385	141.711	78.7827	57.9805	75.337	77.7289	53.65	70.8396	112.73	168.174	94.5412	46.9544	54.8338	58.6412	30.7084	48.8069	43.9828	57.4377	51.8024	37.5111	42.3716	77.6188	23.7983	46.1745	109.087	51.7446	53.1181	59.9808	81.3403	60.0581	86.6724
201465_s_at	78.2408	74.7195	128.833	119.422	48.3846	122.391	68.4418	60.3638	190.289	247.069	148.59	70.8952	63.7516	59.6233	44.727	95.1444	107.691	81.7639	75.3729	136.949	96.0923	118.934	80.139	65.3426	207.893	95.2725	85.4038	54.1719	72.8106	56.8205	81.5609	52.1297	50.7422	58.1655	60.4596	78.4182	62.6875	239.858	54.8919	160.24	115.152	62.6869	56.3571	78.2947	36.1883	66.5141	85.7423	62.4488	345.975
201466_s_at	152.293	113.335	144.765	174.509	164.839	549.058	295.452	240.017	204.135	1556.79	67.8796	110.667	135.756	77.1377	211.01	433.666	68.1759	741.246	1143.37	650.58	532.761	350.185	174.719	240.737	285.099	424.444	615.59	763.407	231.242	124.208	93.4371	100.475	44.4843	50.3874	50.1117	99.7468	74.5399	88.3298	51.2248	417.156	42.9952	57.2837	73.0747	95.3683	38.1898	56.476	73.3404	207.338	148.105
[truncated: 21,221 more rows]
[truncated: 69 more columns]

## Sheet: MixedProfiles
	Lin-_1	Lin-_2	MNC_1	MNC_2
1007_s_at	72.1192	87.1131	149.697	139.931
1053_at	568.023	563.842	319.543	321.281
117_at	93.6954	82.5143	2595.57	2470.03
121_at	105.725	93.6998	82.9519	79.2029
1255_g_at	14.2415	12.8664	12.3657	13.6362
1294_at	1343.61	1227.76	833.033	845.019
1316_at	106.647	116.087	109.846	104.327
1320_at	42.1482	48.7133	53.7045	49.5515
[truncated: 22,207 more rows]
